# Supplementary material
Source: PubMed Central journal article supplement (PMC4051237)

## I. Supplementary Methods

|                                                                        |     |
|------------------------------------------------------------------------|-----|
| 1. General materials and methods.....                                  | S2  |
| 1.1 General materials.....                                             | S2  |
| 1.2 General methods.....                                               | S2  |
| 2. Synthesis of 2-chloro-4-nitrophenyl glycosides ( <b>2-20</b> )..... | S2  |
| 3. 2-chloro-4-nitrophenyl glycoside library screening.....             | S16 |
| 4. Single enzyme coupled reaction.....                                 | S17 |

## II. Supplementary Results

### Supplementary Figures

|                                                                                                                                     |     |
|-------------------------------------------------------------------------------------------------------------------------------------|-----|
| <b>Figure S1.</b> Library of synthesized 2-chloro-4-nitrophenyl glycoside donors .....                                              | S18 |
| <b>Figure S2.</b> HPLC chromatogram of UDP-sugar forming reactions.....                                                             | S19 |
| <b>Figure S3.</b> HPLC chromatogram of TDP-sugar forming reactions.....                                                             | S20 |
| <b>Figure S4.</b> HPLC of OleD Loki-catalyzed transglycosylation reactions<br>with 2-chloro-4-nitrophenyl glycosides.....           | S21 |
| <b>Figure S5.</b> HPLC of OleD Loki-catalyzed transglycosylation reactions<br>with 2-chloro-4-nitrophenyl glycoside HCl salts ..... | S22 |

### Supplementary Tables

|                                                                                                   |     |
|---------------------------------------------------------------------------------------------------|-----|
| <b>Table S1.</b> Summary of 2-chloro-4-nitrophenyl aminosugar donors syntheses.....               | S23 |
| <b>Table S2.</b> Percentage conversion and retention time of the NDP-sugars.....                  | S24 |
| <b>Table S3.</b> HRMS of the synthesized NDP-sugars.....                                          | S25 |
| <b>Table S4.</b> Characterization data of the glycosylated 4-methylumbelliferone.....             | S26 |
| <b>Table S5.</b> <sup>1</sup> H NMR, gCOSY, <sup>13</sup> C NMR of the synthesized compounds..... | S27 |

## III. Supplementary reference

|                                       |     |
|---------------------------------------|-----|
| <b>Supplementary references</b> ..... | S31 |
|---------------------------------------|-----|

## 1. General materials and methods.

**1.1. General Materials.** Unless otherwise stated, all chemicals and reagents were purchased from Sigma-Aldrich (St. Louis, MO, USA) and utilized as received. Compound **1** was previously synthesized from glucose,<sup>[S1]</sup> Compound **22**<sup>[S2]</sup>, **24**,<sup>[S3]</sup> **26**,<sup>[S4]</sup> **28**,<sup>[S5]</sup> were synthesized following prior published protocols.

**1.2. General Methods.** High resolution mass spectrometric data were obtained on a Waters (Milford, MA) LCT time-of-flight spectrometer for electrospray ionization (ESI) or AB SCIEX TripleTOF<sup>®</sup> 5600 System. NMR spectra were obtained on either a Varian Unity Inova 400 or 500 MHz instrument (Palo Alto, CA) using 99.8% CDCl<sub>3</sub> with 0.05% v/v TMS or 99.8% CD<sub>3</sub>OD from Cambridge isotopes (Cambridge Isotope Laboratories, MA, USA). <sup>1</sup>H and <sup>13</sup>C chemical shifts were referenced to internal solvent resonances. Multiplicities are indicated by s (singlet), d (doublet), t (triplet), q (quartet), and m (multiplet) and br (broad). Chemical shifts are reported in parts per million (ppm) and coupling constants *J* are given in Hz. Routine <sup>13</sup>C NMR spectra were fully decoupled by broad-broad WALTZ decoupling. All NMR spectra were recorded at ambient temperature. Normal phase flash chromatography was performed on 40 – 63 μm, 60 Å silica gel (from Silicycle, Quebec, Canada). Analytical TLC was performed on silica gel glass TLC plates (from EMD chemical Inc). TLC visualization was accomplished with UV light (254 nm) followed by staining with diluted sulfuric acid (5% in ethanol) solution and heating.

## 2. Synthesis of 2-chloro-4-nitrophenyl glycosides (2-20).

**2.1. General procedure of bromination with TiBr<sub>4</sub>/EtOAc.** The per-*O*-acylated glycoside (1 eq) was dissolved in CH<sub>2</sub>Cl<sub>2</sub>/EtOAc (100/1) to a final concentration of 200 mM. To this solution was added TiBr<sub>4</sub> (2 eq) and the reaction was stirred under room temperature for 12 h or until TLC indicated completion of the reaction. The reaction was quenched by adding NaOAc (1 eq) and stirred for 15 mins, then filtered through celite and washed with CH<sub>2</sub>Cl<sub>2</sub> (50 mL, x3). The brown filtrate was washed with water until the organic layer became colorless. The organic layer was then washed with brine and dried over Na<sub>2</sub>SO<sub>4</sub>. After the removal of the solvent, the per-*O*-acetylated-1-bromo-glycosides were purified by normal phase column chromatography (using a gradient from 100:0 to 40:60 hexanes:EtOAc) and subjected to glycosylation reaction immediately upon isolation.

**2.2. General procedure for Koenigs-Knorr glycosylation reaction.** To the per-*O*-acylated glycosyl bromide (1.0 eq) in anhydrous 150 mM CH<sub>3</sub>CN solution was added 2-chloro-4-nitrophenol (2.0 eq) and 4 Å molecular sieves. The mixture was stirred for 30 min before Ag<sub>2</sub>O (1.5 eq) was added to the solution. The reaction was stirred under room temperature for 12 h or until TLC indicated the completion of the reaction. The reaction was quenched by filtering through celite and was subsequently washed with EtOAc to recover all material. After the removal of the solvent under vacuum, the 2-chloro-4-nitrophenyl glycoside was purified by normal phase column chromatography (using a gradient from 100:0 to 40:60 hexanes:EtOAc) to afford the desired per-*O*-acylated 2-chloro-nitrophenyl glycoside as the pure product.

**2.3. General procedure for deacetylation.** A solution of per-*O*-acylated 2-chloro-4-nitrophenyl glycoside (100 mM) and NaOMe (2 eq) in MeOH was stirred at room temperature until the complete consumption of starting material (~ 2 h). The reaction was quenched by adding Amberlite 120 (H<sup>+</sup>) (4 eq) and stirred for 30 min. The reaction mixture was filtered through celite and was subsequently washed with EtOAc to recover all material. After the removal of solvent under vacuum, the desired 2-chloro-4-nitrophenyl glycoside was purified by normal phase column chromatography (using a gradient from 100:0 to 80:20 CH<sub>2</sub>Cl<sub>2</sub>:MeOH) to afford the 2-chloro-4-nitrophenyl glycoside as the pure product.

**2.4. General procedure for azide reduction.** To a 100 mM solution of 2-chloro-4-nitrophenyl azidosugar glycoside (1 eq) in THF was added PPh<sub>3</sub> (1.2 eq) or PMe<sub>3</sub> in THF (1.2 eq) and the reaction was stirred at 50 °C for 1 h. After removal of the solvent under reduced pressure, the residue was purified by normal-phase column chromatography (using a gradient from 100:0 CH<sub>2</sub>Cl<sub>2</sub>:MeOH to 80:20 CH<sub>2</sub>Cl<sub>2</sub>:MeOH) to afford the desired 2-chloro-4-nitrophenyl aminosugar glycoside as the pure product.

**2.5. General procedure for 2-chloro-4-nitrophenyl aminosugar glycoside HCl formation.** The purified 2-chloro-4-nitrophenyl aminosugar glycoside was dissolved into water (4 mM) and acidified to pH 4 using 1 M HCl solution. After the removal of the solvent by reduced pressure, the 2-chloro-4-nitrophenyl aminosugar glycoside hydrochloride salt was obtained and used without further purification.

**2.6. General procedure azidosugar formation.** Tf<sub>2</sub>O (1.5 eq) was slowly added to a 125 mM CH<sub>2</sub>Cl<sub>2</sub> solution of suitably-protected glycoside (1.0 eq) and pyridine (1.6 eq) under 0 °C and the reaction was stirred at 0 °C for 30 min. The reaction was diluted with CH<sub>2</sub>Cl<sub>2</sub> and washed with water, sat. NaHCO<sub>3</sub>, and brine and dried over Na<sub>2</sub>SO<sub>4</sub>. After filtration, the CH<sub>2</sub>Cl<sub>2</sub> solution was concentrated in *vacuo* to less than 4 mL and transferred to 100 mL DMF solution containing NaN<sub>3</sub> (2.0 eq). The reaction mixture was stirred at room temperature for 12 h and filtered through a celite pad. The filtrate was concentrated under reduced pressure and purified by normal-phase column chromatography (using a gradient from 90:10 to 30:70 hexanes:EtOAc).

### 2.7. Synthesis of (2-chloro-4-nitrophenyl)-6-deoxy-6-amino-β-D-glucopyranoside (2).

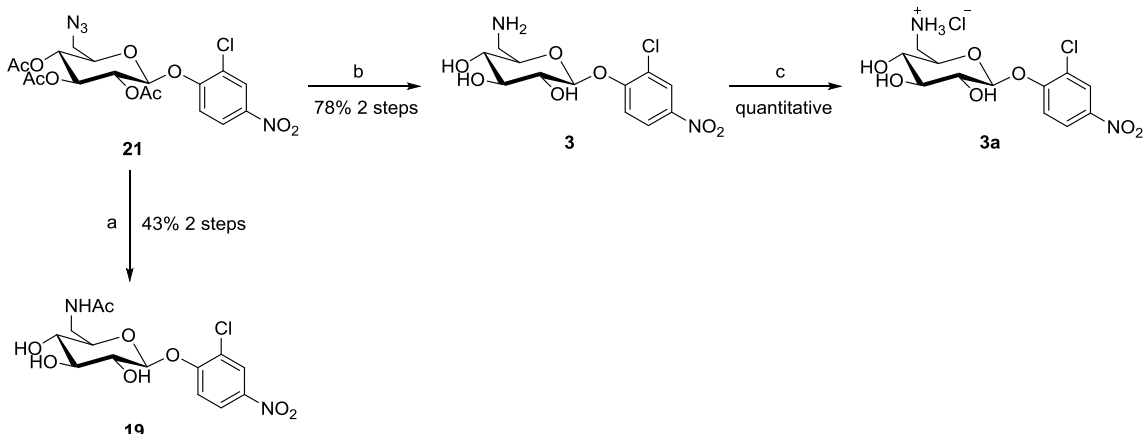

(a) (1) PPh<sub>3</sub>, CH<sub>3</sub>CN/water=10/1, (2) NaOMe, MeOH; (b) (1) NaOMe, MeOH, (2) PMe<sub>3</sub> in toluene, THF; (c) HCl, Water

**(2-chloro-4-nitrophenyl)-6-deoxy-6-amino-β-D-glucopyranoside (3).** To a 10 mL MeOH solution of **21**<sup>[S1]</sup> (58.3 mg, 0.12 mmol) was added 80 μl 1 M NaOMe/MeOH solution and according to general protocol **2.3**, (2-chloro-4-nitrophenyl)-6-deoxy-6-azido-β-D-glucopyranoside **2**<sup>[S1]</sup> (43.0 mg, 0.12 mmol) was obtained. The subsequent **2.4** general protocol for reduction of **2** yielded **3** (33.2 mg, 78% yield after 2 steps) as a white solid. <sup>1</sup>H NMR (CD<sub>3</sub>OD, 500 MHz) δ ppm 8.32 (d, *J* = 2.7 Hz, 1 H), 8.19 (dd, *J* = 9.2, 2.8 Hz, 1 H), 7.41 (d, *J* = 9.3 Hz, 1 H), 5.20 (d, *J* = 7.6 Hz, 1 H), 3.57 (dd, *J* = 9.5, 7.6 Hz, 1 H), 3.42 - 3.52 (m, 3 H), 3.09 (dd, *J* = 13.6, 3.1 Hz, 1 H), 2.79 (dd, *J* = 13.7, 7.6 Hz, 1 H). <sup>13</sup>C NMR (D<sub>2</sub>O, 125 MHz) δ ppm 157.4, 142.7, 126.5, 124.5, 123.6, 115.6, 99.9, 76.1, 75.4, 72.8, 71.1, 41.5. HRMS-ESI (*m/z*): [M+Na]<sup>+</sup> calcd for C<sub>12</sub>H<sub>15</sub>ClN<sub>2</sub>O<sub>7</sub>Na, 357.0460; found 357.0457.

**(2-chloro-4-nitrophenyl)-6-deoxy-6-amino-β-D-glucopyranoside hydrochloride (3a).** According to general protocol **2.5**, **3** (30.0 mg, 0.08 mmol) yielded **3a** (33 mg, quantitative yield) as a light yellow solid. <sup>1</sup>H NMR (D<sub>2</sub>O, 500 MHz) δ ppm 8.48 (dd, *J* = 2.8, 1.3 Hz, 1 H), 8.27 (dd, *J* = 9.3, 2.9 Hz, 1 H), 7.41 (d, *J* = 9.3 Hz, 1 H), 5.44 (d, *J* = 7.8 Hz, 1 H), 3.8 - 4.0 (m, 1 H), 3.79 (t, *J* = 8.3 Hz, 1 H), 3.70 (t, *J*

= 9.3 Hz, 1 H), 3.5 (m, 2 H), 3.21 (dd,  $J = 13.7, 8.5$  Hz, 1 H).  $^{13}\text{C}$  NMR ( $\text{D}_2\text{O}$ , 125 MHz)  $\delta$  157.3, 142.6, 126.5, 124.5, 123.6, 115.6, 99.9, 75.1, 72.6, 71.1, 62.8, 40.6. HRMS-ESI ( $m/z$ ):  $[\text{M}]^+$  calcd for  $\text{C}_{12}\text{H}_{16}\text{ClN}_2\text{O}_7$ , 335.0646; found 335.0647.

**(2-chloro-4-nitrophenyl)-6-deoxy-6-*N*-acetylamino- $\beta$ -D-glucopyranoside (19).** To a 10 mL  $\text{CH}_3\text{CN}/\text{H}_2\text{O}$  (10/1) solution of (2-chloro-4-nitrophenyl)-2,3,4-triacetyl-6-deoxy-6-azido-glucoside **21** <sup>[S1]</sup> (30 mg, 0.06 mmol) was added  $\text{PPh}_3$  (25 mg, 0.09 mmol) and the reaction was stirred under room temperature for 12 h. The solvent was removed in *vacuo* and the residue was purified by column chromatography (using a gradient from 50:50 to 90:10 EtOAc:MeOH) to give the amine. To a 10 mL MeOH solution of this amine was added 60  $\mu\text{l}$  1 M NaOMe/MeOH solution and according to **2.3** general protocol for deacetylation reaction **19** (10 mg, 0.03 mmol) was obtained in 43% after two steps.  $^1\text{H}$  NMR ( $\text{CD}_3\text{OD}$ , 400 MHz)  $\delta$  ppm 8.31 (d,  $J = 2.7$  Hz, 1 H), 8.18 (dd,  $J = 9.5, 3.0$  Hz, 1 H), 7.38 (d,  $J = 9.4$  Hz, 1 H), 5.18 (d,  $J = 7.6$  Hz, 1 H), 3.5 - 3.6 (m, 3 H), 3.4 - 3.5 (m, 2 H), 3.25 (t,  $J = 9.0$  Hz, 1 H), 1.94 (s, 3 H).  $^{13}\text{C}$  NMR ( $\text{CD}_3\text{OD}$ , 100 MHz)  $\delta$  172.5, 157.7, 142.1, 125.3, 123.34, 123.31, 115.2, 100.0, 75.9, 74.8, 73.1, 70.9, 39.9, 20.9. HRMS-ESI ( $m/z$ ):  $[\text{M}+\text{Na}]^+$  calcd for  $\text{C}_{14}\text{H}_{17}\text{ClN}_2\text{O}_8\text{Na}$ , 399.0566; found 399.0566.

## 2.8. Synthesis of (2-chloro-4-nitrophenyl)-2-deoxy-2-amino- $\beta$ -D-glucopyranoside (5).

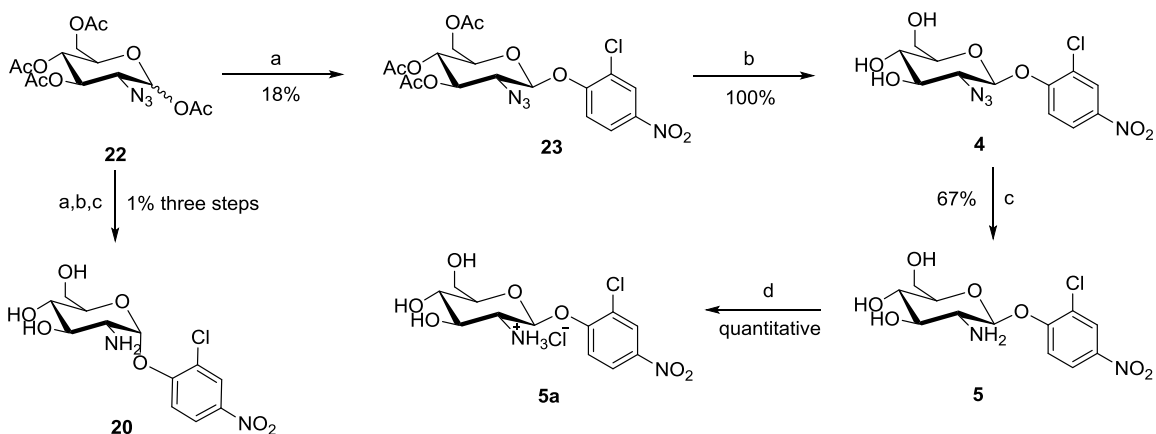

(a) (1)  $\text{TiBr}_4$ ,  $\text{CH}_2\text{Cl}_2/\text{EtOAc}$ , (2) 2-chloro-4-nitrophenol,  $\text{Ag}_2\text{O}$ ,  $\text{CH}_3\text{CN}$ , M.S., R. T., 12 hours; (b) NaOMe, MeOH; (c)  $\text{PMe}_3$  in toluene, THF; (d) HCl, Water

**(2-chloro-4-nitrophenyl)-3,4,6-tri-*O*-acetyl-2-deoxy-2-azido- $\beta$ -D-glucopyranoside (23).** According to general procedure **2.1** and **2.2**, **22** (1.42 g, 3.81 mmol) yielded **23** (0.33g, 18% yield after two steps) as a white solid.  $^1\text{H}$  NMR ( $\text{CDCl}_3$ , 400 MHz)  $\delta$  8.35 (d,  $J = 2.7$  Hz, 1 H), 8.15 (dd,  $J = 9.2, 2.7$  Hz, 1 H), 7.18 (d,  $J = 9.2$  Hz, 1 H), 5.1 (m, 2 H), 5.05 (d,  $J = 8.0$  Hz, 1 H), 4.30 (dd,  $J = 12.4, 5.6$  Hz, 1 H), 4.17 (dd,  $J = 12.4, 2.4$  Hz, 1 H), 3.8 (m, 2 H), 2.13 (s, 3 H), 2.09 (s, 3 H), 2.05 - 2.07 (m, 3 H).  $^{13}\text{C}$  NMR ( $\text{CDCl}_3$ , 125 MHz)  $\delta$  ppm 170.5, 170.0, 169.7, 157.0, 143.5, 126.6, 125.0, 123.7, 115.9, 99.9, 72.8, 72.2, 68.2, 64.0, 61.9, 20.9, 20.9, 20.8. HRMS-ESI ( $m/z$ ):  $[\text{M}+\text{Na}]^+$  calcd for  $\text{C}_{18}\text{H}_{19}\text{ClN}_4\text{O}_{10}\text{Na}$ , 509.0682; found 509.0679.

**(2-chloro-4-nitrophenyl)-2-deoxy-2-azido- $\beta$ -D-glucopyranoside (4).** According to general procedure **2.3**, **23** (0.16 g, 0.33 mmol) yielded **4** (0.13 g, 100% yield) as a light yellow solid.  $^1\text{H}$  NMR ( $\text{CD}_3\text{OD}$ , 500 MHz)  $\delta$  ppm 8.33 (d,  $J = 2.7$  Hz, 1 H), 8.19 (dd,  $J = 9.0, 2.7$  Hz, 1 H), 7.44 (d,  $J = 9.3$  Hz, 1 H), 5.21 (d,  $J = 7.8$  Hz, 1 H), 3.91 (dd,  $J = 12.2, 2.2$  Hz, 1 H), 3.71 (dd,  $J = 12.2, 5.6$  Hz, 1 H), 3.5 (m, 2 H), 3.4 - 3.5 (m, 2 H).  $^{13}\text{C}$  NMR ( $\text{CD}_3\text{OD}$ , 125 MHz)  $\delta$  157.5, 142.7, 125.5, 123.8, 123.4, 115.8, 99.4, 77.4, 75.0, 69.8, 66.9, 61.0. HRMS-ESI ( $m/z$ ):  $[\text{M}+\text{Na}]^+$  calcd for  $\text{C}_{12}\text{H}_{13}\text{ClN}_4\text{O}_7\text{Na}$ , 383.0365; found 383.0385.



**(2-chloro-4-nitrophenyl)-2-deoxy-2-amino-β-D-glucopyranoside (5).** According to general procedure **2.4**, **4** (62.3 mg, 0.17 mmol) yielded **5** (39.8 mg, 67% yield) as a yellow solid. <sup>1</sup>H NMR (CD<sub>3</sub>OD, 400 MHz) δ ppm 8.33 (d, *J* = 2.7 Hz, 1 H), 8.20 (dd, *J* = 9.2, 2.7 Hz, 1 H), 7.49 (d, *J* = 9.4 Hz, 1 H), 5.05 (d, *J* = 8.0 Hz, 1 H), 3.92 (dd, *J* = 12.1, 2.1 Hz, 1 H), 3.72 (dd, *J* = 12.2, 5.8 Hz, 1 H), 3.5 (m, 1 H), 3.40 (dd, *J* = 9.4, 8.2 Hz, 2 H), 2.99 (dd, *J* = 9.4, 8.0 Hz, 1 H). <sup>13</sup>C NMR (CD<sub>3</sub>OD, 100 MHz) δ 157.9, 142.6, 125.4, 123.8, 123.5, 116.1, 101.9, 77.6, 75.8, 70.0, 61.1, 56.8. HRMS-ESI (*m/z*): [M+H]<sup>+</sup> calcd for C<sub>12</sub>H<sub>16</sub>ClN<sub>2</sub>O<sub>7</sub>, 335.0641; found 335.0622.

**(2-chloro-4-nitrophenyl)-2-deoxy-2-amino-β-D-glucopyranoside hydrochloride (5a).** According to general procedure **2.5**, **5** (17 mg, 0.05 mmol) yielded **5a** (18.8 mg, quantitative yield) as a yellow oil. <sup>1</sup>H NMR (D<sub>2</sub>O, 500 MHz) δ ppm 8.43 (d, *J* = 2.9 Hz, 1 H), 8.24 (dd, *J* = 9.3, 2.7 Hz, 1 H), 7.45 (d, *J* = 9.3 Hz, 1 H), 5.66 (d, *J* = 8.5 Hz, 1 H), 3.97 (dd, *J* = 12.5, 2.2 Hz, 1 H), 3.9 (m, 2 H), 3.77 (d, *J* = 2.2 Hz, 1 H), 3.65 (t, *J* = 9.8 Hz, 1 H), 3.57 (dd, *J* = 10.6, 8.4 Hz, 1 H). <sup>13</sup>C NMR (D<sub>2</sub>O, 125 MHz) δ 156.3, 143.2, 126.5, 124.5, 124.0, 116.6, 96.7, 77.0, 72.1, 69.6, 60.3, 55.5. HRMS-ESI (*m/z*): [M]<sup>+</sup> calcd for C<sub>12</sub>H<sub>16</sub>ClN<sub>2</sub>O<sub>7</sub>, 335.0641; found 335.0642.

**(2-chloro-4-nitrophenyl)-2-deoxy-2-amino-α-D-glucopyranoside (20).** According to general procedure **2.1-2.4**, **22** (1.42 g, 3.81 mmol) yielded **20** (5.7 mg, 1% yield after three steps) as minor product. <sup>1</sup>H NMR (CD<sub>3</sub>OD, 500 MHz) δ ppm 8.34 (d, *J* = 2.7 Hz, 1 H), 8.20 (dd, *J* = 9.3, 2.7 Hz, 1 H), 7.60 (d, *J* = 9.3 Hz, 1 H), 5.74 (d, *J* = 3.4 Hz, 1 H), 3.75 (dd, *J* = 12.2, 2.4 Hz, 1 H), 3.7 (m, 2 H), 3.57 (ddd, *J* = 5.2, 2.3, 2.0 Hz, 1 H), 3.42 (dd, *J* = 10.0, 8.8 Hz, 1 H), 2.85 (dd, *J* = 10.0, 3.4 Hz, 1 H). <sup>13</sup>C NMR (CD<sub>3</sub>OD, 100 MHz) δ 157.1, 142.3, 125.2, 125.1, 123.6, 115.6, 99.3, 74.5, 74.4, 69.8, 60.8, 55.5. HRMS-ESI (*m/z*): [M+H]<sup>+</sup> calcd for C<sub>12</sub>H<sub>16</sub>ClN<sub>2</sub>O<sub>7</sub>, 335.0641; found 335.0622.

## 2.9. Synthesis of (2-chloro-4-nitrophenyl)-3-deoxy-3-amino-β-D-glucopyranoside (7).

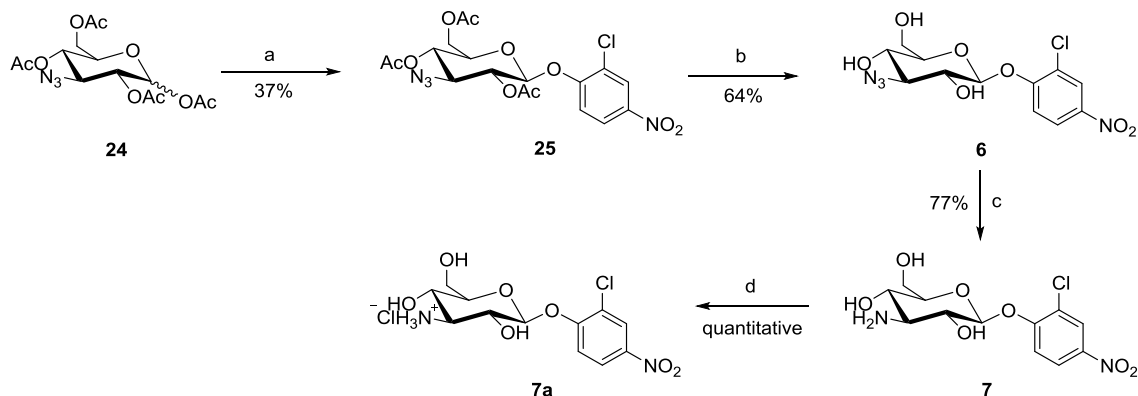

(a) (1) TiBr<sub>4</sub>, CH<sub>2</sub>Cl<sub>2</sub>/EtOAc; (2) 2-chloro-4-nitrophenol, Ag<sub>2</sub>O, CH<sub>3</sub>CN, M.S., R. T., 12 hours; (b) NaOMe, MeOH; (c) PMe<sub>3</sub> in toluene, THF; (d) HCl, Water

**(2-chloro-4-nitrophenyl)-2,4,6-tri-O-acetyl-3-deoxy-3-azido-β-D-glucopyranoside (25).** According to general procedure **2.1** and **2.2**, **24** (0.40 g, 1.07 mmol) yielded **25** (0.19 g, 37% yield for two steps) as a white solid. <sup>1</sup>H NMR (CDCl<sub>3</sub>, 400 MHz) δ 8.30 (d, *J* = 2.5 Hz, 1 H), 8.12 (dd, *J* = 9.0, 2.7 Hz, 1 H), 7.24 (d, *J* = 9.0 Hz, 1 H), 5.32 (dd, *J* = 10.2, 7.9 Hz, 1 H), 5.07 (d, *J* = 7.8 Hz, 1 H), 5.09 (t, *J* = 9.2 Hz, 1 H), 4.1 - 4.2 (m, 2 H), 3.8 (m, 1 H), 3.77 (t, *J* = 10.0 Hz, 1 H), 2.17 (s, 3 H), 2.16 (s, 3 H), 2.11 (s, 3 H). <sup>13</sup>C NMR (CDCl<sub>3</sub>, 100 MHz) δ 170.6, 169.3, 168.9, 157.4, 143.5, 126.4, 125.3, 123.7, 116.8, 99.8, 73.6, 70.4, 68.3, 64.0, 61.9, 20.9, 20.82, 20.80. HRMS-ESI (*m/z*): [M+Na]<sup>+</sup> calcd for C<sub>18</sub>H<sub>19</sub>ClN<sub>4</sub>O<sub>10</sub>Na, 509.0682; found 509.0692.

**(2-chloro-4-nitrophenyl)-3-deoxy-3-azido-β-D-glucopyranoside (6).** According to general procedure **2.3**, **25** (0.19 g, 0.39 mmol) yielded **6** (0.09 g, 64% yield) as a white solid. <sup>1</sup>H NMR (CD<sub>3</sub>OD, 400 MHz) δ ppm 8.30 (d, *J* = 2.7 Hz, 1 H), 8.18 (dd, *J* = 9.2, 2.7 Hz, 1 H), 7.43 (d, *J* = 9.2 Hz, 1 H), 5.24 (d, *J* = 7.6

Hz, 1 H), 3.88 (dd,  $J = 12.1, 2.1$  Hz, 1 H), 3.70 (dd,  $J = 12.1, 5.5$  Hz, 1 H), 3.5 (m, 2 H), 3.4 - 3.5 (m, 2 H).  $^{13}\text{C}$  NMR ( $\text{CD}_3\text{OD}$ , 100 MHz)  $\delta$  157.9, 142.4, 125.5, 123.7 (2 carbons), 115.6, 100.5, 77.8, 72.1, 69.9, 68.4, 60.8. HRMS-ESI ( $m/z$ ):  $[\text{M}+\text{Na}]^+$  calcd for  $\text{C}_{12}\text{H}_{13}\text{ClN}_4\text{O}_7\text{Na}$ , 383.0365; found 383.0348.

**(2-chloro-4-nitrophenyl)-3-deoxy-3-amino- $\beta$ -D-glucopyranoside (7).** According to general protocol **2.4**, **6** (35.7 mg, 0.096 mmol) yielded **7** (25.6 mg, 77% yield) as a yellow solid.  $^1\text{H}$  NMR ( $\text{CD}_3\text{OD}$ , 400 MHz)  $\delta$  ppm 8.28 (d,  $J = 2.7$  Hz, 1 H), 8.14 (dd,  $J = 9.2, 2.7$  Hz, 1 H), 7.42 (d,  $J = 9.4$  Hz, 1 H), 5.18 (d,  $J = 7.8$  Hz, 1 H), 4.66 (br. s., 1 H), 3.44 (t,  $J = 6.8$  Hz, 3 H), 3.24 (t,  $J = 8.6$  Hz, 1 H), 3.09 (t,  $J = 9.2$  Hz, 1 H), 2.64 (t,  $J = 9.5$  Hz, 1 H).  $^{13}\text{C}$  NMR ( $\text{DMSO}-d_6$ , 100 MHz)  $\delta$  158.3, 142.1, 126.1, 124.8, 122.9, 116.3, 100.7, 78.8, 73.3, 69.9, 61.0, 59.8. HRMS-ESI ( $m/z$ ):  $[\text{M}+\text{H}]^+$  calcd for  $\text{C}_{12}\text{H}_{16}\text{ClN}_2\text{O}_7$ , 335.0641; found 335.0626.

**(2-chloro-4-nitrophenyl)-3-deoxy-3-amino- $\beta$ -D-glucopyranoside hydrochloride (7a).** According to general procedure **2.5**, **7** (8.9 mg, 0.03 mmol) yielded **7a** (12.0 mg, quantitative yield) as a white solid.  $^1\text{H}$  NMR ( $\text{D}_2\text{O}$ , 500 MHz)  $\delta$  ppm 8.43 (d,  $J = 2.7$  Hz, 1 H), 8.24 (dd,  $J = 9.2, 2.8$  Hz, 1 H), 7.43 (d,  $J = 9.3$  Hz, 1 H), 5.44 (d,  $J = 7.6$  Hz, 1 H), 3.9 (m,  $J = 10.5$  Hz, 2 H), 3.8 - 3.9 (m, 3 H), 3.42 - 3.49 (m, 1 H).  $^{13}\text{C}$  NMR ( $\text{D}_2\text{O}$ , 100 MHz)  $\delta$  157.2, 142.8, 126.4, 124.5, 123.6, 115.9, 100.2, 77.4, 69.2, 65.7, 60.0, 57.7. HRMS-ESI ( $m/z$ ):  $[\text{M}]^+$  calcd for  $\text{C}_{12}\text{H}_{16}\text{ClN}_2\text{O}_7$ , 335.0646; found 335.0628.

## 2.10. Synthesis of (2-chloro-4-nitrophenyl)-4-deoxy-4-amino- $\beta$ -D-glucopyranoside (9).

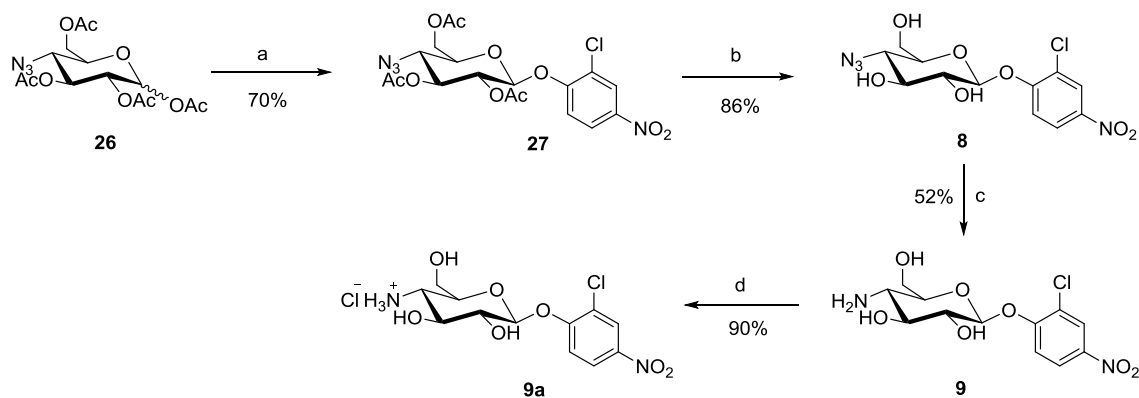

(a) (1)  $\text{TiBr}_4$ ,  $\text{CH}_2\text{Cl}_2/\text{EtOAc}$ , (2) 2-chloro-4-nitrophenol,  $\text{Ag}_2\text{O}$ ,  $\text{CH}_3\text{CN}$ , M.S., R. T., 12 hours; (b)  $\text{NaOMe}$ ,  $\text{MeOH}$ ; (c)  $\text{PPh}_3$ ,  $\text{THF}$ ; (d)  $\text{HCl}$ , Water

**(2-chloro-4-nitrophenyl)-2,3,6-tri-O-acetyl-4-deoxy-4-azido- $\beta$ -D-glucopyranoside (27).** According to general procedure **2.1** and **2.2**, **26** (1.38 g, 3.7 mmol) yielded **27** (1.26 g, 70% yield for two steps) as a white solid.  $^1\text{H}$  NMR ( $\text{CDCl}_3$ , 500 MHz)  $\delta$  ppm 8.29 (d,  $J = 2.7$  Hz, 1 H), 8.13 (dd,  $J = 9.2, 2.8$  Hz, 1 H), 7.23 (d,  $J = 9.0$  Hz, 1 H), 5.2 - 5.3 (m, 2 H), 5.13 (d,  $J = 7.6$  Hz, 1 H), 4.50 (dd,  $J = 12.2, 2.2$  Hz, 1 H), 4.31 (dd,  $J = 12.3, 5.0$  Hz, 1 H), 3.81 (t,  $J = 10.0$  Hz, 1 H), 3.70 (ddd,  $J = 5.1, 2.6, 1.8$  Hz, 1 H), 2.15 (s, 3 H), 2.12 (s, 3 H), 2.09 (s, 3 H).  $^{13}\text{C}$  NMR ( $\text{CDCl}_3$ , 125 MHz)  $\delta$  170.5, 170.0, 169.5, 157.4, 143.5, 126.4, 125.2, 123.8, 116.7, 99.5, 73.3, 73.1, 71.0, 62.6, 59.8, 20.9, 20.83, 20.81. HRMS-ESI ( $m/z$ ):  $[\text{M}+\text{Na}]^+$  calcd for  $\text{C}_{18}\text{H}_{19}\text{ClN}_4\text{O}_{10}\text{Na}$ , 509.0682; found  $m/z$  509.0699.

**(2-chloro-4-nitrophenyl)-4-deoxy-4-amino- $\beta$ -D-glucopyranoside (8).** According to general procedure **2.3**, **27** (1.26 g, 2.59 mmol) yielded **8** (0.80 g, 86% yield) as a white solid.  $^1\text{H}$  NMR ( $\text{CD}_3\text{OD}$ , 400 MHz)  $\delta$  ppm 8.33 (d,  $J = 2.7$  Hz, 1 H), 8.17 (dd,  $J = 9.2, 3.7$  Hz, 1 H), 7.40 (d,  $J = 8.8$  Hz, 1 H), 5.18 (d,  $J = 7.0$  Hz, 1 H), 3.8 (m, 1 H), 3.73 (dd,  $J = 12.1, 4.1$  Hz, 1 H), 3.65 (t,  $J = 8.8$  Hz, 1 H), 3.61 (t,  $J = 9.2$  Hz, 1 H), 3.4 - 3.5 (m, 2 H).  $^{13}\text{C}$  NMR ( $\text{CD}_3\text{OD}$ , 100 MHz)  $\delta$  157.9, 142.4, 125.5, 123.6 (2 carbons), 115.5, 100.3, 76.0, 75.4, 73.4, 61.5, 60.8. HRMS-ESI ( $m/z$ ):  $[\text{M}+\text{Na}]^+$  calcd for  $\text{C}_{12}\text{H}_{13}\text{ClN}_4\text{O}_6\text{Na}$ , 383.0365; found 383.0344.

**(2-chloro-4-nitrophenyl)-4-deoxy-4-amino- $\beta$ -D-glucopyranoside (9).** According to general procedure **2.4**, **8** (130 mg, 0.36 mmol) yielded **9** (62.1 mg, 52% yield) as a white solid.  $^1\text{H}$  NMR ( $\text{CD}_3\text{OD}$ , 400 MHz)  $\delta$  8.30 (d,  $J = 2.7$  Hz, 1 H), 8.18 (dd,  $J = 9.3, 2.8$  Hz, 1 H), 7.42 (d,  $J = 9.2$  Hz, 1 H), 5.17 (d,  $J = 7.8$  Hz, 1 H), 3.85 (dd,  $J = 12.2, 2.8$  Hz, 1 H), 3.71 (dd,  $J = 12.3, 5.3$  Hz, 1 H), 3.57 (dd,  $J = 9.1, 7.7$  Hz, 1 H), 3.48 (ddd,  $J = 8.0, 5.3, 2.7$  Hz, 1 H), 3.38 (d,  $J = 9.7$  Hz, 1 H), 2.79 (t,  $J = 9.8$  Hz, 1 H).  $^{13}\text{C}$  NMR ( $\text{CD}_3\text{OD}$ , 100 MHz)  $\delta$  158.1, 142.3, 125.4, 123.6 (2 carbons), 115.5, 100.7, 77.6, 76.5, 73.6, 61.5, 53.0. HRMS-ESI ( $m/z$ ):  $[\text{M}+\text{H}]^+$  calcd for  $\text{C}_{12}\text{H}_{16}\text{ClN}_2\text{O}_7$ , 335.0641; found 335.0626.

**(2-chloro-4-nitrophenyl)-4-deoxy-4-amino- $\beta$ -D-glucopyranoside hydrochloride (9a).** According to general procedure **2.5**, **9** (36.0 mg, 0.11 mmol) yielded **9a** (36.0 mg, 90% yield) as a yellow solid.  $^1\text{H}$  NMR ( $\text{D}_2\text{O}$ , 500 MHz)  $\delta$  ppm 8.32 (d,  $J = 2.7$  Hz, 1 H), 8.15 (dd,  $J = 9.3, 2.7$  Hz, 1 H), 7.35 (d,  $J = 9.3$  Hz, 1 H), 5.36 (d,  $J = 7.6$  Hz, 1 H), 4.07 (ddd,  $J = 10.3, 9.3, 4.9$  Hz, 1 H), 3.97 (dd,  $J = 12.7, 3.9$  Hz, 1 H), 3.8 - 3.9 (m, 2 H), 3.81 (t,  $J = 8.1$  Hz, 1 H), 3.43 (t,  $J = 10.3$  Hz, 1 H).  $^{13}\text{C}$  NMR ( $\text{D}_2\text{O}$ , 125 MHz)  $\delta$  157.3, 142.6, 126.4, 124.5, 123.6, 115.8, 100.0, 73.0, 72.7, 71.9, 60.7, 52.6. HRMS-ESI ( $m/z$ ):  $[\text{M}]^+$  calcd for  $\text{C}_{12}\text{H}_{16}\text{ClN}_2\text{O}_7\text{Na}$ , 335.0646; found 335.0628.

### 2.11. Synthesis of (2-chloro-4-nitrophenyl)-2-deoxy-2-amino- $\beta$ -D-xylopyranoside (11).

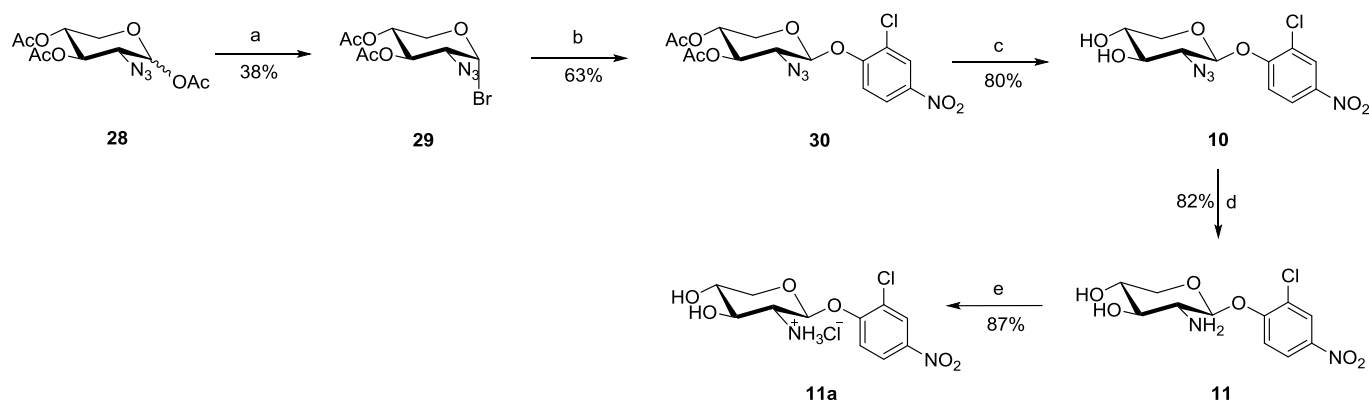

(a)  $\text{TiBr}_4$ ,  $\text{CH}_2\text{Cl}_2/\text{EtOAc}$ ; (b) 2-chloro-4-nitrophenol,  $\text{Ag}_2\text{O}$ ,  $\text{CH}_3\text{CN}$ , M.S., R. T., 12 hours; (c)  $\text{NaOMe}$ ,  $\text{MeOH}$ ; (d)  $\text{PMe}_3$  in toluene,  $\text{THF}$ ; (e)  $\text{HCl}$ , Water

**1-bromo-3,4-di-O-acetyl-2-deoxy-2-azido- $\alpha$ -D-xylopyranoside (29).** According to general procedure **2.1**, **28** (0.20 g, 0.66 mmol) yielded **29** (0.08 g, 38% yield) as a white solid.  $^1\text{H}$  NMR ( $\text{CDCl}_3$ , 400 MHz)  $\delta$  ppm 6.39 (d,  $J = 3.7$  Hz, 1 H), 5.51 (t,  $J = 9.8$  Hz, 1 H), 5.04 (ddd,  $J = 10.9, 9.4, 6.0$  Hz, 1 H), 4.04 (dd,  $J = 11.5, 6.0$  Hz, 1 H), 3.91 (t,  $J = 11.3$  Hz, 1 H), 3.71 (dd,  $J = 10.1, 3.9$  Hz, 1 H), 2.13 (s, 3 H), 2.06 (s, 3 H).  $^{13}\text{C}$  NMR ( $\text{CDCl}_3$ , 100 MHz)  $\delta$  ppm 170.1, 169.7, 88.6, 71.1, 68.4, 63.0, 62.7, 20.8, 20.8. HRMS-ESI ( $m/z$ ):  $[\text{M}+\text{Na}]^+$  calcd for  $\text{C}_9\text{H}_{12}\text{ClN}_3\text{O}_5\text{Na}$ , 343.9853; found 343.9865.

**(2-chloro-4-nitrophenyl)-3,4-di-O-acetyl-2-deoxy-2-azido- $\beta$ -D-xylopyranoside (30).** According to general procedure **2.2**, **29** (80 mg, 0.25 mmol) yielded **30** (64.9 mg, 63% yield) as a white solid.  $^1\text{H}$  NMR ( $\text{CDCl}_3$ , 400 MHz)  $\delta$  ppm 8.34 (d,  $J = 2.7$  Hz, 1 H), 8.15 (dd,  $J = 9.2, 2.7$  Hz, 1 H), 7.21 (d,  $J = 9.2$  Hz, 1 H), 5.15 (t,  $J = 6.44$  Hz, 1H), 5.12 (d,  $J = 8.0$  Hz, 1H), 5.03 (td,  $J = 7.8, 4.8$  Hz, 1 H), 4.23 (dd,  $J = 12.2, 4.8$  Hz, 1 H), 3.90 (dd,  $J = 9.0, 6.6$  Hz, 1 H), 3.57 (dd,  $J = 12.1, 7.8$  Hz, 1 H), 2.17 (s, 3 H), 2.09 (s, 3 H).  $^{13}\text{C}$  NMR ( $\text{CDCl}_3$ , 100 MHz)  $\delta$  ppm 170.0, 169.8, 156.9, 143.2, 126.5, 124.7, 123.8, 115.9, 99.8, 70.7, 68.5, 62.8, 62.3, 20.92, 20.91. HRMS-ESI ( $m/z$ ):  $[\text{M}+\text{Na}]^+$  calcd for  $\text{C}_{15}\text{H}_{15}\text{ClN}_4\text{O}_8\text{Na}$ , 437.0471; found 437.0459.

**(2-chloro-4-nitrophenyl)-2-deoxy-2-amino- $\beta$ -D-xylopyranoside (10).** According to general procedure **2.3**, **30** (65 mg, 0.16 mmol) yielded **10** (41.4 mg, 80% yield) as a light yellow solid.  $^1\text{H}$  NMR ( $\text{CD}_3\text{OD}$ , 500 MHz)  $\delta$  ppm 8.32 (d,  $J = 2.7$  Hz, 1 H), 8.17 (dd,  $J = 9.2, 2.8$  Hz, 1 H), 7.36 (d,  $J = 9.3$  Hz, 1 H),

5.13 (d,  $J = 7.8$  Hz, 1 H), 3.98 (dd,  $J = 11.5, 5.4$  Hz, 1 H), 3.64 (ddd,  $J = 10.4, 8.9, 5.4$  Hz, 1 H), 3.53 (dd,  $J = 9.8, 7.8$  Hz, 1 H), 3.3 (m, 2 H).  $^{13}\text{C}$  NMR ( $\text{CD}_3\text{OD}$ , 125 MHz)  $\delta$  ppm 157.4, 142.8, 125.6, 123.7 (2 carbons), 115.6, 100.0, 75.0, 69.5, 66.8, 66.1. HRMS-ESI ( $m/z$ ):  $[\text{M}+\text{Na}]^+$  calcd for  $\text{C}_{11}\text{H}_{11}\text{ClN}_4\text{O}_6\text{Na}$ , 353.0259; found 353.0276.

**(2-chloro-4-nitrophenyl)-2-deoxy-2-amino- $\beta$ -D-xylopyranoside (11).** According to general procedure 2.4, **10** (26.5 mg, 0.08 mmol) yielded **11** (20.0 mg, 82% yield) as a white solid.  $^1\text{H}$  NMR ( $\text{CD}_3\text{OD}$ , 400 MHz)  $\delta$  ppm 8.32 (d,  $J = 2.7$  Hz, 1 H), 8.19 (dd,  $J = 9.2, 2.9$  Hz, 1 H), 7.41 (d,  $J = 9.2$  Hz, 1 H), 5.04 (d,  $J = 7.8$  Hz, 1 H), 4.00 (dd,  $J = 11.4, 5.2$  Hz, 1 H), 3.6 (m, 1 H), 3.45 (dd,  $J = 11.4, 10.0$  Hz, 1 H), 3.3 (m, 1 H), 2.98 (dd,  $J = 9.6, 7.7$  Hz, 1 H).  $^{13}\text{C}$  NMR ( $\text{CD}_3\text{OD}$ , 100 MHz)  $\delta$  ppm 157.7, 142.6, 125.5, 123.7 (2 carbons), 115.9, 102.3, 75.4, 69.6, 66.1, 56.5. HRMS-ESI ( $m/z$ ):  $[\text{M}+\text{H}]^+$  calcd for  $\text{C}_{11}\text{H}_{14}\text{ClN}_2\text{O}_6$ , 305.0535; found 305.0543.

**(2-chloro-4-nitrophenyl)-2-deoxy-2-amino- $\beta$ -D-xylopyranoside hydrochloride (11a).** According to general procedure 2.5, **11** (13.3 mg, 0.08 mmol) yielded **11a** (13.0 mg, 87% yield) as a white solid.  $^1\text{H}$  NMR ( $\text{D}_2\text{O}$ , 400 MHz)  $\delta$  ppm 8.36 (d,  $J = 2.7$  Hz, 1 H), 8.16 (dd,  $J = 9.2, 2.7$  Hz, 1 H), 7.37 (d,  $J = 9.2$  Hz, 1 H), 5.56 (d,  $J = 7.8$  Hz, 1 H), 4.11 (dd,  $J = 12.0, 4.2$  Hz, 1 H), 3.7 (m, 2 H), 3.5 (m, 2 H).  $^{13}\text{C}$  NMR ( $\text{D}_2\text{O}$ , 100 MHz)  $\delta$  ppm 156.1, 143.2, 126.5, 124.4, 124.0, 116.6, 97.1, 71.6, 69.1, 65.7, 55.0. HRMS-ESI ( $m/z$ ):  $[\text{M}]^+$  calcd for  $\text{C}_{11}\text{H}_{14}\text{ClN}_2\text{O}_6\text{Na}$ , 305.0535; found 305.0544.

## 2.12. Synthesis of (2-chloro-4-nitrophenyl)-4-deoxy-4-amino- $\beta$ -L-xylopyranoside (15).

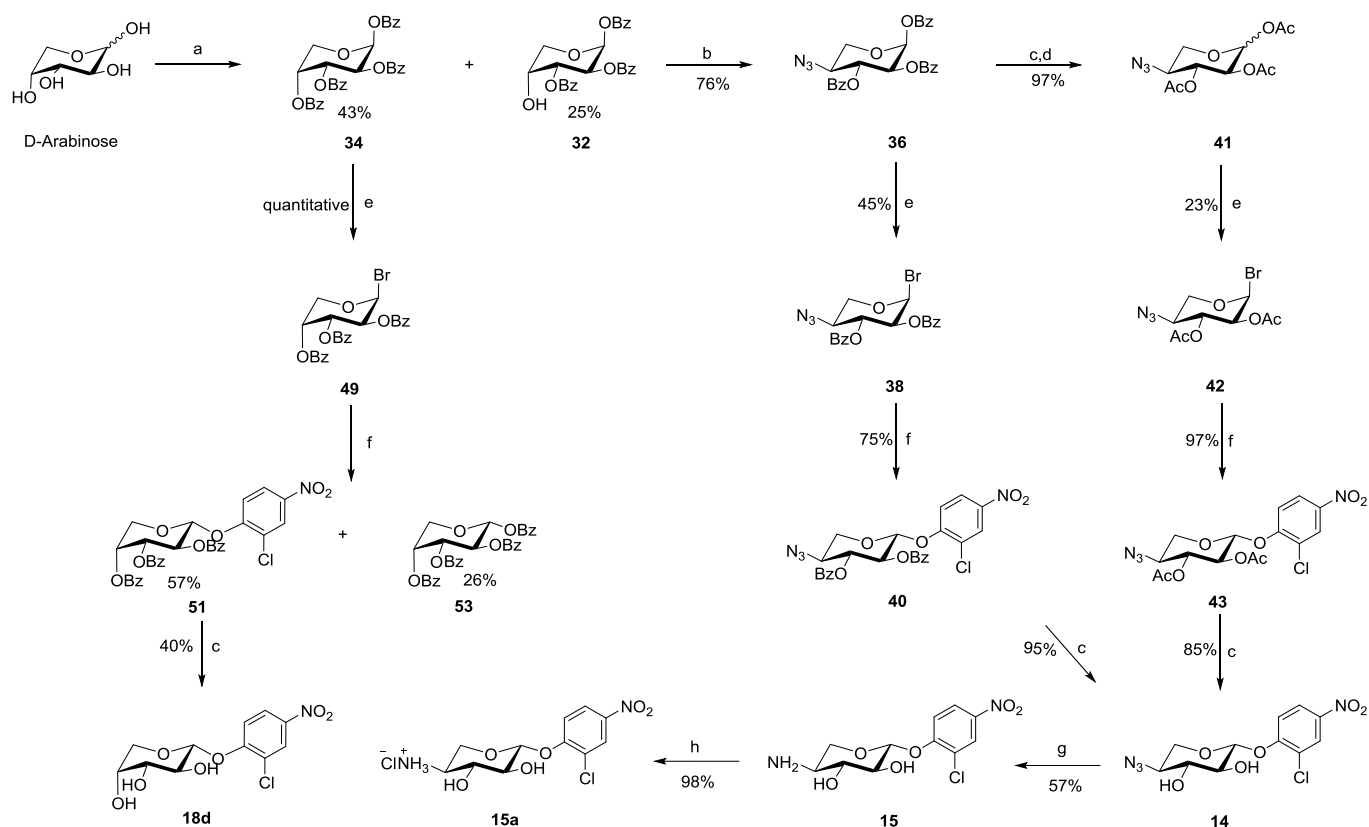

(a)  $\text{BzCl}$ , Pyridine,  $-78^\circ\text{C}$ -RT; (b) (1)  $\text{TiF}_2\text{O}$ , pyridine,  $\text{CH}_2\text{Cl}_2$ , (2)  $\text{NaN}_3$ , DMF; (c)  $\text{NaOMe}$ ,  $\text{MeOH}$ ; (d)  $\text{Ac}_2\text{O}$ ,  $\text{Et}_3\text{N}$ , DMAP,  $\text{CH}_2\text{Cl}_2$ ; (e)  $\text{TiBr}_4$ ,  $\text{CH}_2\text{Cl}_2/\text{EtOAc}$   
 (f) 2-chloro-4-nitrophenol,  $\text{Ag}_2\text{O}$ ,  $\text{CH}_3\text{CN}$ , M.S., R. T., 12 hours; (g)  $\text{PPh}_3$ , THF; (h)  $\text{HCl}$ , Water

**1,2,3-tri-O-benzoyl- $\alpha$ -D-arabinopyranoside (32).** To a solution of D-arabinose (1.0 g, 6.7 mmol) in anhydrous pyridine (20 mL) at  $-50^\circ\text{C}$  with stirring was added benzoyl chloride (2.48 mL, 21.3 mmol) in a dropwise fashion. The reaction was held below  $-20^\circ\text{C}$  for 2 h and then allowed to slowly warm to

room temperature. The reaction was quenched by removing pyridine in *vacuo* and the residue was diluted with EtOAc and washed with 1N HCl, NaHCO<sub>3</sub> (sat), water, and brine. The organic phase was dried over Na<sub>2</sub>SO<sub>4</sub> and purified by normal-phase column chromatography (using a gradient from 100:0 Hexanes:EtOAc to 70:30 Hexanes:EtOAc). Compound **32** (0.76 g, 1.64 mmol) was obtained in 25% as a white solid along with **34** (1.62 g, 2.86 mmol, 43% yield). **32**: <sup>1</sup>H NMR (CDCl<sub>3</sub>, 500 MHz) δ ppm 8.1 (m, 2 H), 8.0 (m, 2 H), 7.9 (m, 2 H), 7.6 (m, 2 H), 7.4 - 7.5 (m, 5 H), 7.3 (m, 2 H), 6.76 (d, *J* = 3.7 Hz, 1 H), 6.03 (dd, *J* = 10.5, 3.7 Hz, 1 H), 5.85 (dd, *J* = 10.5, 3.2 Hz, 1 H), 4.49 (br. s., 1 H), 4.26 (dd, *J* = 12.9, 1.2 Hz, 1 H), 4.04 (dd, *J* = 12.8, 2.1 Hz, 2 H). <sup>13</sup>C NMR (CDCl<sub>3</sub>, 100 MHz) δ ppm 166.14, 165.79, 164.96, 133.94, 133.84, 133.55, 130.09 (3 carbons), 130.05 (3 carbons), 129.95 (3 carbons), 128.91, 128.78 (2 carbons), 128.59 (3 carbons), 91.56, 71.08, 68.00, 67.58, 64.99. HRMS-ESI (*m/z*): [M+Na]<sup>+</sup> calcd for C<sub>26</sub>H<sub>22</sub>O<sub>8</sub>Na, 485.1207; found 485.1232.

**1,2,3,4-tetra-O-benzoyl-α-D-arabinopyranoside (34)**. <sup>1</sup>H NMR (CDCl<sub>3</sub>, 400 MHz) δ ppm 8.15 (ddd, *J* = 8.1, 4.0, 1.1 Hz, 3 H), 7.8 (m, 3 H), 7.5 - 7.6 (m, 2 H), 7.3 - 7.5 (m, 10 H), 7.26 (t, *J* = 7.6 Hz, 2 H), 6.95 (d, *J* = 2.3 Hz, 1 H), 6.3 (m, 2 H), 5.97 (s, 1 H), 4.46 (d, *J* = 12.5 Hz, 1 H), 4.21 (dd, *J* = 13.5, 1.9 Hz, 1 H). <sup>13</sup>C NMR (CDCl<sub>3</sub>, 100 MHz) δ ppm 165.97, 165.94, 165.83, 164.93, 134.08, 133.80, 133.70 (2 carbons), 133.65 (3 carbons), 130.15 (3 carbons), 129.98 (3 carbons), 129.41, 129.23, 129.07, 129.00 (2 carbons), 128.88 (2 carbons), 128.67 (2 carbons), 128.64 (2 carbons), 91.41, 69.81, 68.53, 68.15, 63.34. HRMS-ESI (*m/z*): [M+Na]<sup>+</sup> calcd for C<sub>33</sub>H<sub>26</sub>O<sub>9</sub>Na, 589.1469; found 589.1491.

**1,2,3-tri-O-benzoyl-4-deoxy-4-azido-α-L-xylopyranoside (36)**. According to general procedure **2.6**, **32** (0.76 g, 1.64 mmol) yielded **36** (0.61 g, 76% yield) as a white oil. <sup>1</sup>H NMR (CDCl<sub>3</sub>, 500 MHz) δ ppm 8.1 (m, 2 H), 8.0 (m, 2 H), 7.9 (m, 2 H), 7.63 (tt, *J* = 7.5, 1.3 Hz, 2 H), 7.4 - 7.6 (m, 5 H), 7.2 - 7.3 (m, 2 H), 6.70 (d, *J* = 3.7 Hz, 1 H), 6.01 (t, *J* = 9.6 Hz, 1 H), 5.50 (dd, *J* = 10.0, 3.7 Hz, 1 H), 4.0 (m, 2 H), 3.90 (d, *J* = 12.9 Hz, 1 H). <sup>13</sup>C NMR (CDCl<sub>3</sub>, 100 MHz) δ ppm 165.97, 165.70, 164.78, 134.18 (3 carbons), 133.88 (3 carbons), 133.79, 130.23, 130.10, 129.17, 129.12, 129.04, 128.82 (2 carbons), 128.77 (2 carbons), 128.70 (2 carbons), 90.50, 71.33, 70.69, 62.26, 59.76. HRMS-ESI (*m/z*): [M+Na]<sup>+</sup> calcd for C<sub>26</sub>H<sub>21</sub>N<sub>3</sub>O<sub>7</sub>Na, 510.1272; found 510.1279.

**1-bromo-2,3-di-O-benzoyl-4-deoxy-4-azido-α-L-xylopyranoside (38)**. According to general procedure **2.1**, **36** (27 mg, 0.054 mmol) yielded **38** (11 mg, 45 % yield) as a white oil. <sup>1</sup>H NMR (CDCl<sub>3</sub>, 400 MHz) δ ppm 8.0 (m, 3 H), 7.6 (m, 3 H), 7.4 (m, 4 H), 6.74 (d, *J* = 3.9 Hz, 1 H), 5.96 (t, *J* = 9.6 Hz, 1 H), 5.15 (dd, *J* = 9.9, 3.9 Hz, 1 H), 4.0 (m, 1 H), 3.9 - 4.0 (m, 2 H). <sup>13</sup>C NMR (CDCl<sub>3</sub>, 100 MHz) δ ppm 165.56 (2 carbons), 134.02, 133.80, 130.27 (2 carbons), 130.03 (2 carbons), 129.02, 128.77 (2 carbons), 128.73 (2 carbons), 128.53, 87.83, 71.58, 71.36, 63.98, 59.07. HRMS-ESI (*m/z*): [M+Na]<sup>+</sup> calcd for C<sub>19</sub>H<sub>16</sub>BrN<sub>3</sub>O<sub>5</sub>Na, 468.0166; found 408.0176.

**(2-chloro-4-nitrophenyl)-4-deoxy-4-azido-2,3-di-O-benzoyl-β-L-xylopyranoside (40)**. According to general procedure **2.2**, **38** (11 mg, 0.025 mmol) yielded **40** (10.0 mg, 75% yield) as a white solid. <sup>1</sup>H NMR (CDCl<sub>3</sub>, 500 MHz) δ ppm 8.26 (d, *J* = 2.7 Hz, 1 H), 8.0 - 8.1 (m, 5 H), 7.6 (m, 3 H), 7.4 (m, 3 H), 7.34 (d, *J* = 9.0 Hz, 1 H), 5.63 (dd, *J* = 5.9, 4.4 Hz, 1 H), 5.58 (t, *J* = 6.2 Hz, 1 H), 5.54 (d, *J* = 4.4 Hz, 1 H), 4.41 (dd, *J* = 12.5, 3.9 Hz, 1 H), 3.97 (td, *J* = 6.3, 3.9 Hz, 1 H), 3.80 (dd, *J* = 12.3, 6.2 Hz, 1 H). <sup>13</sup>C NMR (CDCl<sub>3</sub>, 125 MHz) δ ppm 167.32, 167.15, 159.23, 145.04, 135.91, 135.80, 132.18 (2 carbons), 132.15 (2 carbons), 132.03, 132.00, 130.83, 130.68, 130.65, 130.61, 128.28, 126.84, 125.79, 118.19, 100.54, 72.12, 71.12, 63.71, 59.00. HRMS-ESI (*m/z*): [M+Na]<sup>+</sup> calcd for C<sub>25</sub>H<sub>19</sub>ClN<sub>4</sub>O<sub>8</sub>Na, 561.0784; found 561.0802.

**1,2,3-tri-O-acetyl-4-deoxy-4-azido-L-xylopyranoside (41)**. To a solution of **36** (0.55g, 1.13 mmol) in 20 mL was added MeOH 1 M NaOMe in MeOH (2 mL, 2 mmol) and the reaction was stirred at room temperature for 2 h. The reaction was quenched by adding Amberlite 120 (H<sup>+</sup>) (0.1 g) and stirred for 30 min. The reaction mixture was filtered through celite and the celite subsequently washed with MeOH (5 mL, x3). After removal of solvent from collected organics, the residue was dried under vacuum. The

dried residue was dissolved into 40 mL CH<sub>2</sub>Cl<sub>2</sub> solution and to this Et<sub>3</sub>N (1.27 mL, 9.04 mmol), DMAP (34 mg, 0.28 mmol), Ac<sub>2</sub>O (0.53 mL, 5.64 mmol) were added and the reaction was stirred at room temperature for 6 h. To the reaction was added 50 mL ethyl acetate and 50 mL NaHCO<sub>3</sub> (sat) solution and it was stirred vigorously until the evolution of gas halted. The organic layer was washed with water, brine and dried over Na<sub>2</sub>SO<sub>4</sub>. After the removal of the solvent under vacuum the recovered material was purified by normal phase column chromatography (using a gradient from 100:0 Hexanes:EtOAc to 70:30 Hexanes:EtOAc) to give **41** (0.30 g, 1.1 mmol, 97%) as a white powder. <sup>1</sup>H NMR (CDCl<sub>3</sub>, 500 MHz) δ ppm 6.24 (d, *J* = 3.7 Hz, 1 H), 5.64 (d, *J* = 7.6 Hz, 1 H), 5.39 (t, *J* = 9.8 Hz, 1 H), 5.14 (t, *J* = 9.0 Hz, 1 H), 4.9 (m, 2 H), 4.09 (dd, *J* = 12.1, 5.2 Hz, 1 H), 3.88 (dd, *J* = 11.2, 5.4 Hz, 1 H), 3.7 (m, 2 H), 3.65 (t, *J* = 11.5 Hz, 1 H), 3.43 (dd, *J* = 12.0, 10.3 Hz, 1 H), 2.17 (s, 3 H), 2.12 (s, 3 H), 2.11 (s, 3 H), 2.10 (s, 3H), 2.05 (s, 3 H), 2.02 (s, 3 H). <sup>13</sup>C NMR (CDCl<sub>3</sub>, 125 MHz) δ ppm 170.11, 170.09, 170.01, 169.76, 169.26, 169.16, 92.45, 89.64, 73.29, 70.70, 70.33, 69.71, 64.29, 61.86, 59.36, 58.76, 21.13, 21.02, 20.98, 20.91, 20.83, 20.74. HRMS-ESI (*m/z*): [M+Na]<sup>+</sup> calcd for C<sub>11</sub>H<sub>15</sub>N<sub>3</sub>O<sub>7</sub>Na, 324.0802; found 324.0809.

**1-bromo-2,3-di-O-acetyl-4-deoxy-4-azido-α-L-xylopyranoside (42)**. According to general procedure **2.1**, **41** (0.30 g, 1.1 mmol) yielded **42** (80 mg, 23 % yield) as a white oil. <sup>1</sup>H NMR (CDCl<sub>3</sub>, 400 MHz) δ ppm 6.55 (d, *J* = 3.9 Hz, 1 H), 5.50 (t, *J* = 9.7 Hz, 1 H), 4.75 (dd, *J* = 9.9, 3.9 Hz, 1 H), 4.00 (dd, *J* = 10.9, 5.5 Hz, 1 H), 3.84 (t, *J* = 11.5 Hz, 1 H), 3.7 (m, 1 H), 2.13 (s, 3 H), 2.10 (s, 3 H). <sup>13</sup>C NMR (CDCl<sub>3</sub>, 100 MHz) δ ppm 170.1, 169.6, 87.6, 71.0, 70.7, 63.7, 58.7, 20.8 (2 carbons). HRMS-ESI (*m/z*): [M+Na]<sup>+</sup> calcd for C<sub>9</sub>H<sub>12</sub>BrN<sub>3</sub>O<sub>5</sub>Na, 343.9853; found 343.9863.

**(2-chloro-4-nitrophenyl)-4-deoxy-4-azido-2,3-di-O-acetyl-β-L-xylopyranoside (43)**. According to general procedure **2.2**, **42** (80 mg, 0.25 mmol) yielded **43** (100 mg, 97% yield) as a yellow solid. <sup>1</sup>H NMR (CDCl<sub>3</sub>, 500 MHz) δ ppm 8.30 (d, *J* = 2.7 Hz, 1 H), 8.14 (dd, *J* = 9.0, 2.7 Hz, 2 H), 7.25 (d, *J* = 9.0 Hz, 1 H), 5.27 (d, *J* = 5.6 Hz, 1 H), 5.23 (dd, *J* = 7.3, 5.6 Hz, 1 H), 5.19 (d, *J* = 7.3 Hz, 1 H), 4.22 (dd, *J* = 12.2, 4.4 Hz, 1 H), 3.76 (td, *J* = 7.6, 4.6 Hz, 1 H), 3.57 (dd, *J* = 12.2, 8.1 Hz, 1 H), 2.16 (s, 3 H), 2.13 (s, 3 H). <sup>13</sup>C NMR (CDCl<sub>3</sub>, 125 MHz) δ ppm 169.95, 169.62, 157.23, 143.26, 126.48, 124.88, 123.99, 116.20, 98.78, 71.06, 69.45, 62.70, 57.46, 20.99, 20.91. HRMS-ESI (*m/z*): [M+Na]<sup>+</sup> calcd for C<sub>15</sub>H<sub>15</sub>ClN<sub>4</sub>O<sub>8</sub>Na, 437.0471; found 437.0485.

**1-bromo-2,3,4-tri-O-benzoyl-α-D-arabinopyranoside (49)**. According to general procedure **2.1**, **34** (0.40 g, 0.71 mmol) yielded **49** (0.47 g, quantitative yield) as a white solid. <sup>1</sup>H NMR (CDCl<sub>3</sub>, 400 MHz) δ ppm 8.1 (m, 3 H), 8.0 (m, 2 H), 7.8 (m, 2 H), 7.4 - 7.6 (m, 6 H), 7.2 (m, 2 H), 6.96 (d, *J* = 3.9 Hz, 1 H), 6.04 (dd, *J* = 10.4, 3.4 Hz, 1 H), 5.9 (m, 1 H), 5.75 (dd, *J* = 10.5, 3.9 Hz, 1 H), 4.47 (d, *J* = 12.9 Hz, 1 H), 4.24 (dd, *J* = 13.5, 1.9 Hz, 1 H). <sup>13</sup>C NMR (CDCl<sub>3</sub>, 100 MHz) δ ppm 165.82, 165.78, 165.67, 133.99, 133.97, 133.87, 133.63, 130.44, 130.25 (2 carbons), 130.13 (2 carbons), 129.99 (2 carbons), 129.63, 129.49, 129.17, 128.89, 128.80, 128.71, 128.62, 90.14, 69.18, 68.98, 68.86, 65.29. HRMS-ESI (*m/z*): ([M+Na]<sup>+</sup> calcd for C<sub>26</sub>H<sub>21</sub>ClO<sub>7</sub>Na, 547.0363; compound decomposed during MS analysis.

**(2-chloro-4-nitrophenyl)-2,3,4-tri-O-benzoyl-β-D-arabinopyranoside (51)**. According to general procedure **2.2**, **49** (0.47 g, 0.90 mmol) yielded **51** (0.29 g, 57% yield) and **53** (0.12 g, 26%) both as white crystals. <sup>1</sup>H NMR (CDCl<sub>3</sub>, 500 MHz) δ ppm 8.23 (d, *J* = 2.7 Hz, 1 H), 8.12 (dd, *J* = 9.3, 2.7 Hz, 1 H), 8.0 (m, 3 H), 7.5 - 7.6 (m, 4 H), 7.4 - 7.5 (m, 9 H), 5.98 (dd, *J* = 6.1, 4.2 Hz, 1 H), 5.8 (m, 2 H), 5.61 (d, *J* = 4.2 Hz, 1 H), 4.47 (dd, *J* = 12.2, 6.3 Hz, 1 H), 4.1 (m, 1 H). <sup>13</sup>C NMR (CDCl<sub>3</sub>, 125 MHz) δ ppm 165.84, 165.81, 165.34, 157.70, 143.12, 134.07, 133.90, 130.32 (2 carbons), 130.21 (2 carbons), 130.13 (2 carbons), 129.36, 129.25, 129.06, 128.89, 128.85 (2 carbons), 128.75 (2 carbons), 126.41, 124.99, 124.71, 124.01, 116.54, 116.45, 98.70, 69.56, 69.29, 67.09, 61.38. HRMS-ESI (*m/z*): [M+Na]<sup>+</sup> calcd for C<sub>32</sub>H<sub>24</sub>ClNO<sub>10</sub>Na, 640.0981; found 640.0989.

**1,2,3,4-tetra-O-benzoyl-β-D-arabinopyranoside (53)**. According to general procedure **2.2**, **49** (0.47 g, 0.90 mmol) yielded **51** (0.29 g, 57% yield) and **53** (0.12 g, 26%) both as white crystals. <sup>1</sup>H NMR (CDCl<sub>3</sub>,

500 MHz)  $\delta$  ppm 8.0 (m, 7 H), 7.5 - 7.6 (m, 4 H), 7.3 - 7.5 (m, 9 H), 6.27 (d,  $J = 5.4$  Hz, 1 H), 5.95 (dd,  $J = 7.2, 5.5$  Hz, 1 H), 5.8 (m, 2 H), 4.43 (dd,  $J = 12.5, 5.1$  Hz, 1 H), 4.14 (dd,  $J = 12.6, 2.8$  Hz, 1 H).  $^{13}\text{C}$  NMR ( $\text{CDCl}_3$ , 125 MHz)  $\delta$  ppm 165.82, 165.73, 165.38, 165.00, 133.98, 133.87, 133.78, 133.76, 130.41, 130.17, 129.54, 129.35, 129.11, 129.05, 128.82 (2 carbons), 128.79 (2 carbons), 128.76 (2 carbons), 128.74, 92.68, 70.18, 69.17, 67.83, 63.01. HRMS-ESI ( $m/z$ ):  $[\text{M}+\text{Na}]^+$  calcd for  $\text{C}_{33}\text{H}_{26}\text{O}_9\text{Na}$ , 589.1469; found 589.1477.

**(2-chloro-4-nitrophenyl)-4-deoxy-4-azido- $\beta$ -L-xylopyranoside (14).** According to general procedure **2.3, 43** (100 mg, 0.24 mmol) yielded **14** (67 mg, 85% yield) or with **40** (10 mg, 0.018 mmol) yielded **14** (5.8 mg, 95% yield) as a light yellow solid.  $^1\text{H}$  NMR ( $\text{CD}_3\text{OD}$ , 400 MHz)  $\delta$  ppm 8.29 (d,  $J = 2.7$  Hz, 1 H), 8.16 (dd,  $J = 9.2, 2.7$  Hz, 1 H), 7.35 (d,  $J = 9.4$  Hz, 1 H), 5.12 (d,  $J = 7.0$  Hz, 1 H), 4.00 (dd,  $J = 11.1, 4.9$  Hz, 1 H), 3.5 - 3.6 (m, 3 H), 3.4 (m, 1 H).  $^{13}\text{C}$  NMR ( $\text{CD}_3\text{OD}$ , 100 MHz)  $\delta$  ppm 157.8, 142.4, 125.5, 123.6 (2 carbons), 115.5, 101.0, 75.7, 73.3, 63.9, 61.3. HRMS-ESI ( $m/z$ ):  $[\text{M}+\text{Na}]^+$  calcd for  $\text{C}_{11}\text{H}_{11}\text{ClN}_4\text{O}_6\text{Na}$ , 353.0259; found 353.0270.

**(2-chloro-4-nitrophenyl)-4-deoxy-4-amino- $\beta$ -L-xylopyranoside (15).** According to general procedure **2.4, 14** (49.2 mg, 0.15 mmol) yielded **15** (25.6 mg, 57% yield) as a yellow solid.  $^1\text{H}$  NMR ( $\text{CD}_3\text{OD}$ , 500 MHz)  $\delta$  ppm 8.31 (d,  $J = 2.7$  Hz, 1 H), 8.18 (dd,  $J = 9.2, 2.8$  Hz, 1 H), 7.38 (d,  $J = 9.3$  Hz, 1 H), 5.15 (d,  $J = 7.3$  Hz, 1 H), 3.98 (dd,  $J = 11.5, 4.9$  Hz, 1 H), 3.57 (dd,  $J = 8.7, 7.2$  Hz, 1 H), 3.43 (dd,  $J = 11.6, 10.1$  Hz, 1 H), 3.37 (t,  $J = 8.9$  Hz, 1 H), 2.89 (ddd,  $J = 10.0, 9.0, 5.1$  Hz, 1 H).  $^{13}\text{C}$  NMR ( $\text{CD}_3\text{OD}$ , 100 MHz)  $\delta$  ppm 157.9, 142.4, 125.5, 123.7, 123.6, 115.5, 101.3, 76.0, 73.3, 65.8, 52.1. HRMS-ESI ( $m/z$ ):  $[\text{M}+\text{H}]^+$  calcd for  $\text{C}_{11}\text{H}_{14}\text{ClN}_2\text{O}_6$ , 305.0535; found  $m/z$  305.0548.

**(2-chloro-4-nitrophenyl)-4-deoxy-4-amino- $\beta$ -L-xylopyranoside hydrochloride (15a).** According to general procedure **2.5, 15** (8.6 mg, 0.02 mmol) yielded **15a** (9.0 mg, 98% yield) as a yellow solid.  $^1\text{H}$  NMR ( $\text{D}_2\text{O}$ , 400 MHz)  $\delta$  ppm 8.3 (m, 1 H), 8.1 (m, 1 H), 7.34 (d,  $J = 9.4$  Hz, 1 H), 5.33 (d,  $J = 5.5$  Hz, 1 H), 4.26 (dd,  $J = 12.0, 4.8$  Hz, 1 H), 3.7 - 3.8 (m, 3 H), 3.4 (m, 1 H).  $^{13}\text{C}$  NMR ( $\text{DMSO}-d_6$ , 100 MHz)  $\delta$  ppm 157.9, 142.5, 126.3, 124.9, 123.2, 116.6, 100.9, 73.3, 72.3, 62.3, 51.2. HRMS-ESI ( $m/z$ ):  $[\text{M}]^+$  calcd for  $\text{C}_{11}\text{H}_{14}\text{ClN}_2\text{O}_6\text{Na}$ , 305.0535; found 305.0550.

**(2-chloro-4-nitrophenyl)- $\beta$ -D-arabinopyranoside (18d).** According to general procedure **2.2, 51** (140 mg, 0.25 mmol) yielded **18d** (30 mg, 40% yield) as a yellow solid.  $^1\text{H}$  NMR ( $\text{CD}_3\text{OD}$ , 500 MHz)  $\delta$  ppm 8.31 (d,  $J = 2.7$  Hz, 1 H), 8.18 (dd,  $J = 9.2, 2.8$  Hz, 1 H), 7.40 (d,  $J = 9.3$  Hz, 1 H), 5.14 (d,  $J = 6.8$  Hz, 1 H), 3.9 (m, 1 H), 3.9 (m, 2 H), 3.77 (dd,  $J = 12.0, 1.5$  Hz, 1 H), 3.67 (m,  $J = 3.4$  Hz, 1 H).  $^1\text{H}$  NMR (500 MHz,  $\text{DMSO}-d_6$ )  $\delta$  ppm 8.35 (d,  $J = 2.7$  Hz, 1 H), 8.23 (dd,  $J = 9.3, 2.9$  Hz, 1 H), 7.5 (m, 1 H), 5.37 (br. s., 1 H), 5.22 (d,  $J = 6.6$  Hz, 1 H), 4.93 (br. s., 1 H), 4.77 (br. s., 1 H), 3.6 - 3.8 (m, 4 H), 3.53 (d,  $J = 8.1$  Hz, 1 H).  $^{13}\text{C}$  NMR ( $\text{DMSO}-d_6$ , 125 MHz)  $\delta$  ppm 158.4, 142.1, 126.2, 124.9, 123.1, 116.4, 101.2, 72.9, 70.6, 67.8, 66.4. HRMS-ESI ( $m/z$ ):  $[\text{M}+\text{Na}]^+$  calcd for  $\text{C}_{11}\text{H}_{12}\text{ClNO}_7\text{Na}$  328.0195; found 328.0210.

## 2.13. Synthesis of (2-chloro-4-nitrophenyl)-4-deoxy-4-amino- $\beta$ -D-xylopyranoside (13).

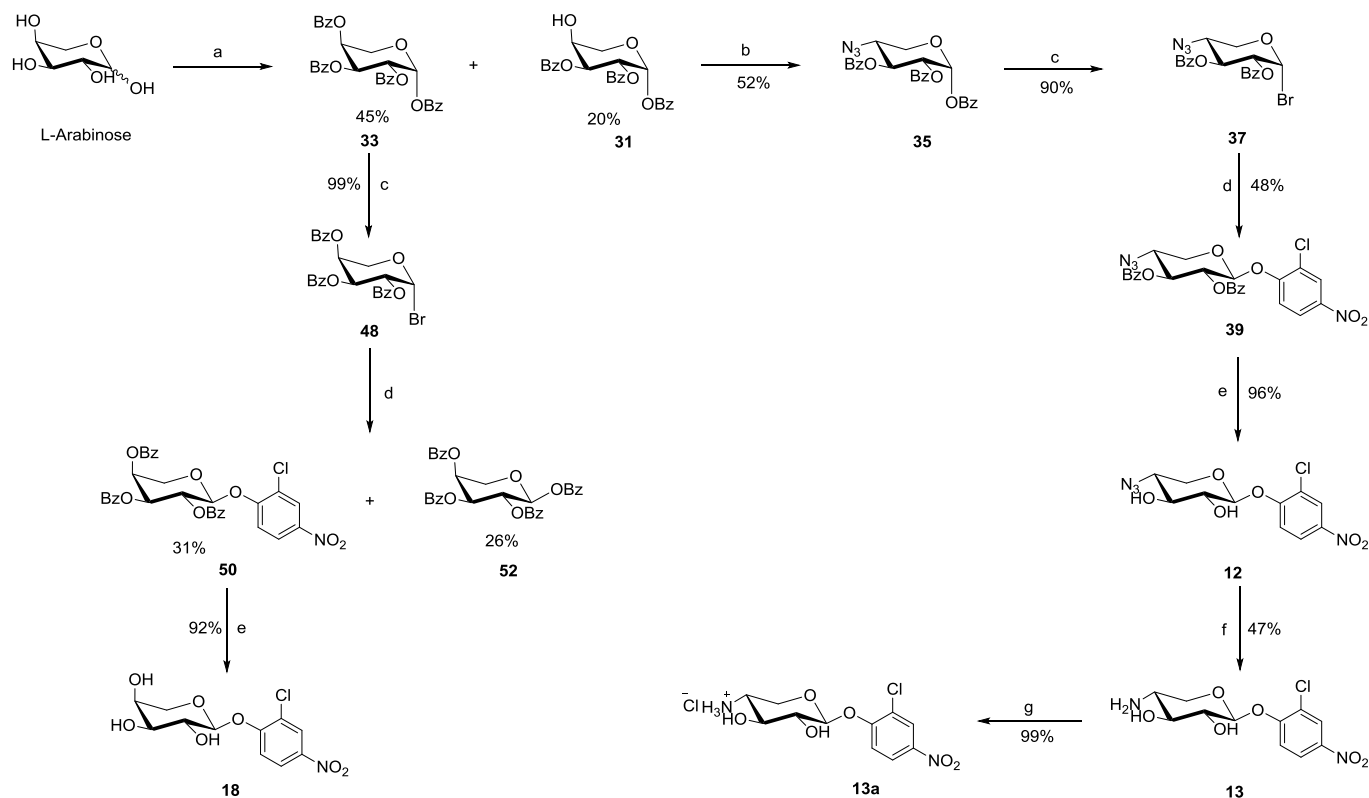

**1,2,3-tri-O-benzoyl- $\beta$ -L-arabinopyranoside (31).** To a magnetically-stirred solution of L-arabinose (2.0 g, 13.3 mmol) in anhydrous pyridine (40 mL) at  $-50^{\circ}\text{C}$  was added benzoyl chloride (4.64 mL, 40.0 mmol) in a dropwise fashion with stirring. The reaction temperature held below  $-20^{\circ}\text{C}$  for 2 h and was slowly allowed to room temperature. The reaction was quenched by removing pyridine in *vacuo* and the residue was diluted with EtOAc and was washed with 1N HCl,  $\text{NaHCO}_3$  (sat), water, and brine. The organic phase was dried over  $\text{Na}_2\text{SO}_4$  and resulting residue was purified by normal phase column chromatography (using a gradient from 100:0 to 70:30 hexanes:EtOAc). Compound **31** (1.22 g, 2.64 mmol) was obtained with a yield of 20% as a white solid along with **33** (3.36 g, 5.94 mmol, 45% yield). **31**:  $^1\text{H}$  NMR ( $\text{CDCl}_3$ , 500 MHz)  $\delta$  ppm 8.12 (d,  $J = 7.3$  Hz, 2 H), 8.03 (d,  $J = 7.3$  Hz, 2 H), 7.87 (d,  $J = 7.3$  Hz, 2 H), 7.5 (m, 1 H), 7.3 - 7.5 (m, 4 H), 7.2 - 7.3 (m, 4 H), 6.79 (d,  $J = 3.7$  Hz, 1 H), 6.12 (dd,  $J = 10.5$ , 3.7 Hz, 1 H), 5.88 (dd,  $J = 10.5$ , 2.9 Hz, 1 H), 4.55 (br. s., 1 H), 4.26 (d,  $J = 12.5$  Hz, 1 H), 4.0 - 4.1 (m, 2 H).  $^{13}\text{C}$  NMR ( $\text{CDCl}_3$ , 100 MHz)  $\delta$  ppm 166.1, 165.6, 164.9, 133.7, 133.5, 133.3, 129.9 (2 carbons), 129.8 (2 carbons), 129.7 (2 carbons), 129.2, 129.0, 128.8, 128.7 (2 carbons), 128.4 (2 carbons), 128.3 (2 carbons), 91.4, 70.9, 67.6, 67.5, 65.0. HRMS-ESI ( $m/z$ ):  $[\text{M}+\text{Na}]^+$  calcd for  $\text{C}_{26}\text{H}_{22}\text{O}_8\text{Na}$ , 485.1207; found 485.1238.

**1,2,3,4-tetra-O-benzoyl- $\beta$ -L-arabinopyranoside (33).**  $^1\text{H}$  NMR ( $\text{CDCl}_3$ , 500 MHz)  $\delta$  ppm 8.28 (d,  $J = 2.0$  Hz, 1 H), 7.9 - 8.2 (m, 8 H), 7.2 - 7.6 (m, 10 H), 7.11 (d,  $J = 9.0$  Hz, 1 H), 6.27 (d,  $J = 5.4$  Hz, 1 H), 5.95 (t,  $J = 6.0$  Hz, 1 H), 5.7 (m, 2 H), 4.44 (dd,  $J = 12.3$ , 5.3 Hz, 1 H), 4.15 (m, 1 H).  $^{13}\text{C}$  NMR ( $\text{CDCl}_3$ , 100 MHz)  $\delta$  ppm 165.75, 165.71, 165.6, 164.7, 133.8, 133.59, 133.49, 133.44, 129.9 (3 carbons), 129.7 (3 carbons), 129.3, 129.1, 128.9, 128.8 (2 carbons), 128.7 (2 carbons), 128.6 (3 carbons), 128.44 (2 carbons), 128.42 (2 carbons), 91.1, 69.5, 68.2, 67.9, 63.1. HRMS-ESI ( $m/z$ ):  $[\text{M}+\text{Na}]^+$  calcd for  $\text{C}_{33}\text{H}_{26}\text{O}_9\text{Na}$ , 589.1469; found 589.1481.



**1,2,3-tri-O-benzoyl-4-deoxy-4-azido- $\alpha$ -D-xylopyranoside (35).** According to general procedure **2.6**, **31** (1.22 g, 2.64 mmol) yielded **35** (0.67 g, 52% yield) as a white oil.  $^1\text{H}$  NMR ( $\text{CDCl}_3$ , 500 MHz)  $\delta$  ppm 8.1 (m, 2 H), 8.0 (m, 2 H), 7.8 - 7.9 (m, 2 H), 7.6 (m, 1 H), 7.5 (m, 3 H), 7.4 (m, 3 H), 7.30 (t,  $J = 7.8$  Hz, 2 H), 6.73 (d,  $J = 3.7$  Hz, 1 H), 6.04 (t,  $J = 9.7$  Hz, 1 H), 5.53 (dd,  $J = 10.0, 3.7$  Hz, 1 H), 4.0 - 4.2 (m, 2 H), 3.9 (m, 1 H).  $^{13}\text{C}$  NMR ( $\text{CDCl}_3$ , 100 MHz)  $\delta$  ppm 165.7, 165.4, 164.5, 133.9, 133.6, 133.5, 129.94 (4 carbons), 129.81 (3 carbons), 128.77 (3 carbons), 128.8, 128.55 (2 carbons), 128.43 (2 carbons), 90.2, 71.0, 70.4, 61.9, 59.4. HRMS-ESI (m/z):  $[\text{M}+\text{Na}]^+$  calcd for  $\text{C}_{26}\text{H}_{21}\text{N}_3\text{O}_7\text{Na}$ , 510.1272; found 510.1273.

**1-bromo-2,3-di-O-benzoyl-4-deoxy-4-azido- $\alpha$ -D-xylopyranoside (37).** According to general procedure **2.1**, **35** (0.67 g, 1.18 mmol) yielded **37** (0.47 mg, 90 % yield) as a white oil.  $^1\text{H}$  NMR ( $\text{CD}_3\text{Cl}$ , 400 MHz)  $\delta$  ppm 7.9 - 8.0 (m, 5 H), 7.5 (m, 2 H), 7.3 - 7.4 (m, 3 H), 6.74 (d,  $J = 3.9$  Hz, 1 H), 5.9 (m, 1 H), 5.16 (dd,  $J = 9.8, 3.9$  Hz, 1 H), 4.1 (m, 1 H), 3.9 - 4.0 (m, 2 H).  $^{13}\text{C}$  NMR ( $\text{CDCl}_3$ , 100 MHz)  $\delta$  ppm 165.3, 133.8, 133.6, 130.0 (2 carbons), 129.8 (2 carbons), 128.7 (2 carbons), 128.6 (2 carbons), 128.5 (2 carbons), 128.2, 87.6, 71.3, 71.1, 63.7, 58.7. HRMS-ESI (m/z): compound decomposed during MS analysis.

**(2-chloro-4-nitrophenyl)-2,3-di-O-benzoyl-4-deoxy-4-azido- $\beta$ -D-xylopyranoside (39).** According to general procedure **2.2**, **37** (0.38 mg, 0.85 mmol) yielded **39** (0.22 g, 48% yield) as a white solid.  $^1\text{H}$  NMR ( $\text{CDCl}_3$ , 400 MHz)  $\delta$  ppm 8.21 (dd,  $J = 2.7, 1.2$  Hz, 1 H), 7.9 - 8.1 (m, 5 H), 7.5 - 7.6 (m, 2 H), 7.3 - 7.4 (m, 5 H), 5.63 (dd,  $J = 5.5, 4.3$  Hz, 1 H), 5.58 (t,  $J = 6.3$  Hz, 1 H), 5.53 (d,  $J = 4.3$  Hz, 1 H), 4.39 (dd,  $J = 12.5, 3.5$  Hz, 1 H), 3.9 - 4.0 (m, 1 H), 3.78 (dd,  $J = 12.5, 6.3$  Hz, 1 H).  $^{13}\text{C}$  NMR ( $\text{CDCl}_3$ , 100 MHz)  $\delta$  ppm 165.2, 165.0, 157.1, 142.8, 133.8, 133.7, 130.03 (2 carbons), 129.87 (2 carbons), 129.8, 129.8, 128.5 (2 carbons), 128.5 (2 carbons), 126.1, 124.6, 123.7, 116.0, 98.4, 70.1, 69.0, 61.6, 56.9. HRMS-ESI (m/z):  $[\text{M}+\text{Na}]^+$  calcd for  $\text{C}_{25}\text{H}_{19}\text{ClN}_4\text{O}_8\text{Na}$ , 561.0784; found 561.1366.

**1-bromo-2,3,4-tri-O-benzoyl- $\beta$ -L-arabinopyranoside (48).** According to general procedure **2.1**, **33** (0.65 g, 1.15 mmol) yielded **48** (0.60 g, 100% yield) as a white solid.  $^1\text{H}$  NMR ( $\text{CDCl}_3$ , 500 MHz)  $\delta$  ppm 8.1 (m, 1 H), 8.05 (d,  $J = 8.3$  Hz, 1 H), 7.88 (d,  $J = 8.3$  Hz, 1 H), 7.62 (d,  $J = 0.7$  Hz, 2 H), 7.3 - 7.6 (m, 8 H), 7.30 (t,  $J = 7.6$  Hz, 2 H), 6.97 (d,  $J = 3.7$  Hz, 1 H), 6.04 (dd,  $J = 10.5, 3.4$  Hz, 1 H), 5.87 (d,  $J = 1.7$  Hz, 1 H), 5.75 (dd,  $J = 10.3, 3.9$  Hz, 1 H), 4.49 (d,  $J = 13.4$  Hz, 1 H), 4.26 (d,  $J = 13.2$  Hz, 1 H).  $^{13}\text{C}$  NMR ( $\text{CDCl}_3$ , 100 MHz)  $\delta$  ppm 172.2, 165.6, 165.55, 165.4, 133.77, 133.6, 133.4, 130.20 (2 carbons), 130.0, 129.87 (2 carbons), 129.7, 129.3, 129.2, 128.9, 128.63, 128.58, 128.55, 128.47, 128.37, 89.8, 68.9, 68.9, 68.7, 65.0. HRMS-ESI (m/z): compound decomposed during MS analysis.

**(2-chloro-4-nitrophenyl)-2,3,4-tri-O-benzoyl- $\alpha$ -L-arabinopyranoside (50).** According to general procedure **2.2**, **48** (0.60 g, 1.15 mmol) yielded **50** (0.22 g, 31% yield) and **52** (0.17 g, 26%) both as white crystals.  $^1\text{H}$  NMR ( $\text{CDCl}_3$ , 500 MHz)  $\delta$  ppm 8.2 - 8.3 (m, 1 H), 7.9 - 8.2 (m, 7 H), 7.3 - 7.6 (m, 9 H), 7.1 (m, 1 H), 5.96 (dd,  $J = 4.9, 3.7$  Hz, 1 H), 5.8 (m, 2 H), 5.59 (d,  $J = 3.7$  Hz, 1 H), 4.47 (dd,  $J = 11.7, 6.6$  Hz, 1 H), 4.1 (m, 1 H).  $^{13}\text{C}$  NMR ( $\text{CDCl}_3$ , 100 MHz)  $\delta$  ppm 165.54, 165.51, 165.0, 157.4, 156.9, 142.81, 133.79, 133.6, 130.02 (2 carbons), 129.90 (2 carbons), 129.85 (2 carbons), 129.8, 128.7, 128.6, 128.54, 128.50, 128.44, 126.1, 125.3, 124.7, 124.5, 123.7, 116.2, 116.1, 98.3, 69.2, 68.9, 66.7, 60.9. HRMS-ESI (m/z):  $[\text{M}+\text{Na}]^+$  calcd for  $\text{C}_{32}\text{H}_{24}\text{ClNO}_{10}\text{Na}$ , 640.0981; found 640.0995.

**1,2,3,4-tetra-O-benzoyl- $\alpha$ -L-arabinopyranoside (52).** According to general procedure **2.2**, **48** (0.60 g, 1.15 mmol) yielded **50** (0.22 g, 31% yield) and **52** (0.17 g, 26%) both as white crystals.  $^1\text{H}$  NMR ( $\text{CDCl}_3$ , 500 MHz)  $\delta$  ppm 8.2 (m, 1 H), 7.9 - 8.2 (m, 8 H), 7.2 - 7.6 (m, 10 H), 7.1 (m, 1 H), 6.27 (d,  $J = 5.4$  Hz, 1 H), 5.95 (t,  $J = 6.0$  Hz, 1 H), 5.7 - 5.8 (m, 2 H), 4.44 (dd,  $J = 12.6, 5.0$  Hz, 1 H), 4.08 - 4.19 (m, 1 H).  $^{13}\text{C}$  NMR ( $\text{CDCl}_3$ , 100 MHz)  $\delta$  ppm 165.6, 165.5, 165.2, 164.8, 156.9, 133.8, 133.64, 133.55, 133.53, 130.10 (2 carbons), 129.86 (3 carbons), 129.13 (2 carbons), 128.94 (2 carbons), 128.69 (2 carbons), 128.6, 128.5, 128.51, 128.48, 128.46, 125.4, 124.5, 116.2, 92.3, 69.9, 68.8, 67.5, 62.7. HRMS-ESI (m/z):  $[\text{M}]^+$  calcd for  $\text{C}_{33}\text{H}_{26}\text{O}_9\text{Na}$ , 589.1469; found m/z 589.1479.

**(2-chloro-4-nitrophenyl)-4-deoxy-4-azido- $\beta$ -D-xylopyranoside (12).** According to general procedure **2.3**, **39** (0.22 g, 0.41 mmol) yielded **12** (0.13 g, 96% yield) as a light yellow solid.  $^1\text{H}$  NMR ( $\text{CD}_3\text{OD}$ , 400 MHz)  $\delta$  ppm 8.27 (d,  $J = 2.7$  Hz, 1 H), 8.14 (dd,  $J = 9.0, 2.7$  Hz, 1 H), 7.33 (d,  $J = 9.4$  Hz, 1 H), 5.09 (d,  $J = 7.0$  Hz, 1 H), 3.98 (dd,  $J = 11.5, 4.5$  Hz, 1 H), 3.5 - 3.6 (m, 3 H), 3.3 (m, 1 H).  $^{13}\text{C}$  NMR ( $\text{CD}_3\text{OD}$ , 100 MHz)  $\delta$  ppm 157.6, 142.2, 125.3, 123.4, 123.3, 115.2, 100.7, 75.5, 73.1, 63.6, 61.1. HRMS-ESI ( $m/z$ ):  $[\text{M}+\text{Na}]^+$  calcd for  $\text{C}_{11}\text{H}_{11}\text{ClN}_4\text{O}_6\text{Na}$ , 353.0259; found 353.0234.

**(2-chloro-4-nitrophenyl)-4-deoxy-4-amino- $\beta$ -D-xylopyranoside (13).** According to general procedure **2.4**, **12** (70 mg, 0.19 mmol) yielded **13** (27.6 mg, 47% yield) as a yellow solid.  $^1\text{H}$  NMR ( $\text{CD}_3\text{OD}$ , 400 MHz)  $\delta$  ppm 8.29 (d,  $J = 2.7$  Hz, 1 H), 8.16 (dd,  $J = 9.0, 2.7$  Hz, 1 H), 7.36 (d,  $J = 9.4$  Hz, 1 H), 5.12 (d,  $J = 7.0$  Hz, 1 H), 3.95 (dd,  $J = 11.5, 4.9$  Hz, 1 H), 3.54 (dd,  $J = 8.8, 7.2$  Hz, 1 H), 3.40 (dd,  $J = 11.5, 10.4$  Hz, 1 H), 3.3 (m, 1 H), 2.85 (ddd,  $J = 10.3, 9.3, 5.1$  Hz, 1 H).  $^{13}\text{C}$  NMR ( $\text{CD}_3\text{OD}$ , 100 MHz)  $\delta$  ppm 157.7, 142.1, 125.3, 123.4, 123.3, 115.2, 101.1, 76.1, 73.1, 65.8, 51.9. HRMS-ESI ( $m/z$ ):  $[\text{M}+\text{H}]^+$  Calcd for  $\text{C}_{11}\text{H}_{14}\text{ClN}_2\text{O}_6$ , 305.0535; found 305.0545.

**(2-chloro-4-nitrophenyl)-4-deoxy-4-amino- $\beta$ -D-xylopyranoside hydrochloride (13a).** According to general procedure **2.5**, **13** (8.3 mg, 0.03 mmol) yielded **13a** (10.0 mg, 100% yield) as a yellow solid.  $^1\text{H}$  NMR ( $\text{D}_2\text{O}$ , 400 MHz)  $\delta$  ppm 8.22 (d,  $J = 2.7$  Hz, 1 H), 8.03 (dd,  $J = 9.4, 2.7$  Hz, 1 H), 7.22 (d,  $J = 9.0$  Hz, 1 H), 5.21 (d,  $J = 6.7$  Hz, 1 H), 4.15 (dd,  $J = 12.1, 4.7$  Hz, 1 H), 3.6 - 3.7 (m, 3 H), 3.32 (td,  $J = 9.3, 4.5$  Hz, 1 H).  $^{13}\text{C}$  NMR ( $\text{D}_2\text{O}$ , 100 MHz)  $\delta$  ppm 156.8, 142.3, 126.0, 124.1, 123.4, 115.5, 99.9, 71.8, 70.7, 61.4, 50.4. HRMS-ESI ( $m/z$ ):  $[\text{M}]^+$  calcd for  $\text{C}_{11}\text{H}_{14}\text{ClN}_2\text{O}_6$ , 305.0535; found 305.0847.

**(2-chloro-4-nitrophenyl)- $\alpha$ -L-arabinopyranoside (18).** According to general procedure **2.2**, **50** (0.22 g, 0.36 mmol) yielded **18** (0.10 g, 92% yield) as a yellow solid.  $^1\text{H}$  NMR ( $\text{CD}_3\text{OD}$ , 400 MHz)  $\delta$  ppm 8.32 (d,  $J = 2.4$  Hz, 1 H), 8.18 (dd,  $J = 9.3, 2.4$  Hz, 1 H), 7.41 (d,  $J = 8.8$  Hz, 1 H), 5.14 (d,  $J = 6.6$  Hz, 1 H), 3.9 (m, 3 H), 3.8 (m, 1 H), 3.67 (dd,  $J = 8.6, 2.9$  Hz, 1 H).  $^{13}\text{C}$  NMR ( $\text{DMSO}-d_6$ , 100 MHz)  $\delta$  ppm 158.1, 141.8, 125.9, 124.6, 122.8, 116.0, 100.9, 72.6, 70.3, 67.5, 66.1. HRMS-ESI ( $m/z$ ):  $[\text{M}+\text{Na}]^+$  calcd for  $\text{C}_{11}\text{H}_{12}\text{ClNO}_7\text{Na}$ , 328.0195; found 328.0192.

## 2.14. Synthesis of (2-chloro-4-nitrophenyl)-3-deoxy-3-amino- $\beta$ -D-xylopyranoside (17).

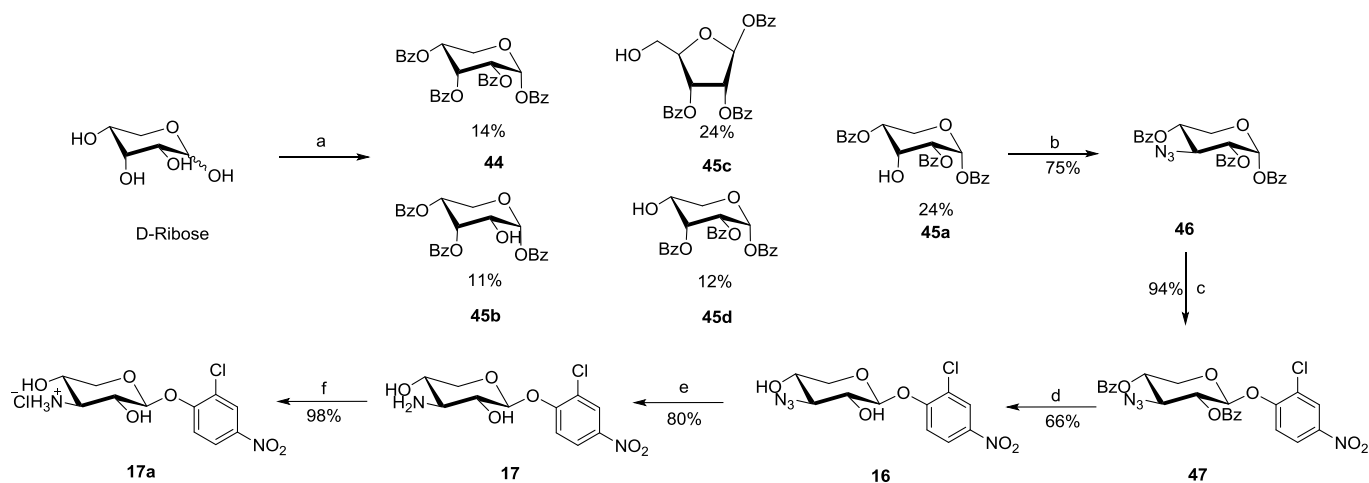

(a)  $\text{BzCl}$  (3.2 eq), Pyridine,  $-50^\circ\text{C}$ -R. T.; (b) (1)  $\text{TiF}_2\text{O}$ , Pyridine,  $\text{CH}_2\text{Cl}_2$ , (2)  $\text{NaN}_3$ , DMF; (c) (1)  $\text{TiBr}_4$ ,  $\text{CH}_2\text{Cl}_2/\text{EtOAc}$ , (2) 2-chloro-4-nitrophenol,  $\text{Ag}_2\text{O}$ ,  $\text{CH}_3\text{CN}$ , M.S., R. T., 12 hours; (d)  $\text{NaOMe}$ ,  $\text{MeOH}$ ; (e)  $\text{PPh}_3$ , THF,  $50^\circ\text{C}$ ; (f)  $\text{HCl}$ , Water

**1,2,3,4-tetra-O-benzoyl- $\alpha$ -D-ribose (44).** To a solution of D-ribose (1.1 g, 7.33 mmol) in anhydrous pyridine (10 ml) at  $-50^\circ\text{C}$  with stirring was added benzoyl chloride (2.72 ml, 23.5 mmol) in

dropwise fashion. The reaction temperature held below  $-20\text{ }^{\circ}\text{C}$  for 2 h and then allowed to slowly warm to room temperature. The solvent was removed in *vacuo* and the residue was diluted with EtOAc and was washed with 1N HCl,  $\text{NaHCO}_3$ , water, and brine. The organic phase was dried over  $\text{Na}_2\text{SO}_4$  and purified by normal phase chromatography (using a gradient of 100:0 Hexanes:EtOAc to 70:30 Hexanes:EtOAc) to afford **44** (0.56 g, 0.99 mmol, 14%) as a white solid, together with **45a** (0.82 g, 1.77 mmol, 24%), **45b** (0.37 g, 0.80 mmol, 11%), **45c** (0.82 g, 1.77 mmol, 24%), and **45d** (0.40 g, 0.86 mmol, 12%). **48**:  $^1\text{H}$  NMR ( $\text{CDCl}_3$ , 500 MHz)  $\delta$  ppm 8.1 (m, 3 H), 8.0 (m, 3 H), 7.8 - 7.9 (m, 3 H), 7.4 - 7.6 (m, 7 H), 7.3 - 7.4 (m, 4 H), 6.63 (d,  $J = 3.4$  Hz, 1 H), 6.06 (t,  $J = 3.8$  Hz, 1 H), 5.74 (td,  $J = 3.8, 0.7$  Hz, 1 H), 5.71 (q,  $J = 3.3$  Hz, 1 H), 4.41 (dd,  $J = 12.9, 2.9$  Hz, 1 H), 4.29 (dd,  $J = 12.9, 4.2$  Hz, 1 H).  $^{13}\text{C}$  NMR ( $\text{CDCl}_3$ , 100 MHz)  $\delta$  ppm 166.18, 165.81, 165.57, 164.56, 134.17, 133.68, 133.65, 133.52 (2 carbons), 130.40 (2 carbons), 130.28 (4 carbons), 130.18 (3 carbons), 130.02, 128.93, 128.72, 128.69, 128.64 (3 carbons), 128.61 (3 carbons), 92.39, 68.04, 67.38, 66.90, 63.41. HRMS-ESI ( $m/z$ ):  $[\text{M}+\text{H}]^+$  calcd for  $\text{C}_{33}\text{H}_{26}\text{O}_9\text{Na}$ , 589.1469; found 589.1498.

**1,2,4-tri-O-benzoyl- $\alpha$ -D-ribose (45a)**.  $^1\text{H}$  NMR ( $\text{CDCl}_3$ , 500 MHz)  $\delta$  ppm 8.0 (m, 3 H), 7.5 (m, 5 H), 7.4 (m, 2 H), 7.3 - 7.4 (m, 5 H), 6.42 (d,  $J = 3.2$  Hz, 1 H), 5.5 (m, 1 H), 5.34 (dt,  $J = 7.5, 3.9$  Hz, 1 H), 4.65 (q,  $J = 3.6$  Hz, 1 H), 4.41 (dd,  $J = 11.7, 7.8$  Hz, 1 H), 4.20 (d,  $J = 3.2$  Hz, 1 H), 3.92 (dd,  $J = 11.6, 3.8$  Hz, 1 H).  $^{13}\text{C}$  NMR ( $\text{CDCl}_3$ , 100 MHz)  $\delta$  ppm 166.10, 165.93, 165.04, 134.05, 133.86, 133.71, 133.67, 133.60, 130.34 (2 carbons), 130.25 (2 carbons), 130.19 (2 carbons), 130.15, 129.63, 129.43, 129.41, 128.87 (2 carbons), 128.79 (2 carbons), 128.69 (2 carbons), 128.65, 128.59, 90.52, 69.42, 68.83, 67.55. HRMS-ESI ( $m/z$ ):  $[\text{M}+\text{Na}]^+$  calcd for  $\text{C}_{26}\text{H}_{22}\text{O}_8\text{Na}$ , 485.1207; found 485.1216.

**1,3,4-tri-O-benzoyl- $\alpha$ -D-ribose (45b)**.  $^1\text{H}$  NMR ( $\text{CDCl}_3$ , 500 MHz)  $\delta$  ppm 8.1 (m, 3 H), 8.0 (m, 3 H), 7.9 (m, 2 H), 7.3 - 7.7 (m, 7 H), 6.49 (d,  $J = 3.2$  Hz, 1 H), 5.79 (t,  $J = 3.5$  Hz, 1 H), 5.7 (m, 1 H), 4.32 (dd,  $J = 13.1, 2.3$  Hz, 1 H), 4.25 (dt,  $J = 3.4, 1.7$  Hz, 1 H), 4.20 (dd,  $J = 13.1, 3.5$  Hz, 1 H).  $^{13}\text{C}$  NMR ( $\text{CDCl}_3$ , 125 MHz)  $\delta$  ppm 165.85, 165.65, 164.71, 134.10, 133.90, 133.78, 130.36, 130.27, 130.20, 130.13, 130.10, 130.03, 129.91, 129.18 (2 carbons), 128.96 (2 carbons), 128.74 (2 carbons), 128.67, 128.63, 94.67, 69.25, 68.42, 68.04, 63.29. HRMS-ESI ( $m/z$ ):  $[\text{M}+\text{H}]^+$  calcd for  $\text{C}_{26}\text{H}_{22}\text{O}_8\text{Na}$ , 485.1207; found 485.1212.

**1,2,3-tri-O-benzoyl- $\alpha$ -D-ribose (45c)**.  $^1\text{H}$  NMR ( $\text{CDCl}_3$ , 500 MHz)  $\delta$  ppm 7.9 - 8.1 (m, 3 H), 7.5 - 7.6 (m, 5 H), 7.4 (m, 2 H), 7.0 - 7.4 (m, 5 H), 6.57 (d,  $J = 3.2$  Hz, 1 H), 5.50 (t,  $J = 3.8$  Hz, 1 H), 5.45 (q,  $J = 3.2$  Hz, 1 H), 4.66 (t,  $J = 3.8$  Hz, 1 H), 4.20 (m,  $J = 2.9$  Hz, 2 H), 3.6 (s, broad, 1H).  $^{13}\text{C}$  NMR ( $\text{CDCl}_3$ , 125 MHz)  $\delta$  ppm 167.03, 166.63, 164.57, 134.10, 133.75, 133.64, 130.39 (3 carbons), 130.29 (3 carbons), 130.22, 129.86, 129.56, 129.24, 128.92 (2 carbons), 128.67 (2 carbons), 128.64, 92.29, 70.31, 69.95, 65.53, 63.18. HRMS-ESI ( $m/z$ ):  $[\text{M}+\text{H}]^+$  calcd for  $\text{C}_{26}\text{H}_{22}\text{O}_8\text{Na}$ , 485.1207; found 485.1217.

**1,2,3-tri-O-benzoyl- $\alpha$ -D-ribose (45d)**.  $^1\text{H}$  NMR ( $\text{CDCl}_3$ , 500 MHz)  $\delta$  ppm 7.9 - 8.1 (m, 4 H), 7.5 - 7.8 (m, 4 H), 7.3 - 7.5 (m, 7 H), 6.53 (d,  $J = 3.9$  Hz, 1 H), 5.81 (t,  $J = 3.4$  Hz, 1 H), 5.66 (td,  $J = 3.8, 1.0$  Hz, 1 H), 4.3 (m, 1 H), 4.23 (dd,  $J = 12.3, 2.6$  Hz, 1 H), 4.1 (m, 1 H).  $^{13}\text{C}$  NMR ( $\text{CDCl}_3$ , 125 MHz)  $\delta$  ppm 166.07, 165.46, 164.65, 134.19, 133.98, 133.84, 130.30 (2 carbons), 130.15 (2 carbons), 130.11 (2 carbons), 129.49, 129.26, 129.05, 128.96 (2 carbons), 128.95 (2 carbons), 128.82 (2 carbons), 92.20, 69.37, 69.03, 66.93, 66.08. HRMS-ESI ( $m/z$ ):  $[\text{M}+\text{H}]^+$  calcd for  $\text{C}_{26}\text{H}_{22}\text{O}_8\text{Na}$ , 485.1207; found 485.1221.

**3-deoxy-3-azido-1,2,4-tri-O-benzoyl-D-xylopyranoside (46)**. According to general procedure **2.6**, **45a** (0.82 g, 1.77 mmol) yielded **46** (0.65 g, 75% yield) as a white solid.  $^1\text{H}$  NMR ( $\text{CDCl}_3$ , 500 MHz)  $\delta$  ppm ( $\alpha/\beta=2/1$ ) ppm 8.1 (m, 5 H), 7.3 - 7.7 (m, 10 H), 6.70 (d,  $J = 3.7$  Hz, 0.7 H), 6.21 (d,  $J = 6.1$  Hz, 0.3 H), 5.46 (dd,  $J = 8.1, 6.1$  Hz, 0.3 H), 5.34 (dd,  $J = 10.5, 3.7$  Hz, 0.7 H), 5.27 (td,  $J = 10.3, 5.7$  Hz, 0.7 H), 5.22 (td,  $J = 7.6, 4.4$  Hz, 0.3 H), 4.4 (m, 1 H), 4.2 (m, 1 H), 3.94 (m,  $J = 11.0, 11.0$  Hz, 0.7 H), 3.81 (dd,  $J = 12.2, 7.6$  Hz, 0.3 H).  $^{13}\text{C}$  NMR ( $\text{CDCl}_3$ , 125 MHz)  $\delta$  ppm 165.53, 165.42, 164.69, 134.18, 134.05, 133.95 (2 carbons), 130.39 (2 carbons), 130.19, 130.15, 129.03, 128.93, 128.91, 128.89, 128.86 (2

carbons), 128.83 (2 carbons), 128.80 (2 carbons), 89.89, 70.98, 70.20, 61.84, 61.32. HRMS-ESI (m/z): [M+Na]<sup>+</sup> calcd for C<sub>26</sub>H<sub>21</sub>N<sub>3</sub>O<sub>7</sub>Na, 510.1272; found 510.1281.

**(2-chloro-4-nitrophenyl)-3-deoxy-3-azido-2,4-di-O-benzoyl-β-D-xylopyranoside (47).** According to general procedure **2.2, 46** (0.26 g, 0.53 mmol) yielded **47** (0.27 g, 94% yield) as a white solid. <sup>1</sup>H NMR (CDCl<sub>3</sub>, 500 MHz) δ ppm 8.28 (d, *J* = 2.7 Hz, 1 H), 8.13 (dd, *J* = 9.2, 2.8 Hz, 1 H), 7.9 (m, 2 H), 7.6 (m, 2 H), 7.4 (m, 3 H), 7.3 (m, 3 H), 7.32 (d, *J* = 9.3 Hz, 1 H), 5.60 (d, *J* = 4.4 Hz, 1 H), 5.52 (dd, *J* = 6.3, 4.2 Hz, 1 H), 5.14 (td, *J* = 5.9, 3.7 Hz, 1 H), 4.43 (dd, *J* = 12.5, 3.7 Hz, 1 H), 4.31 (t, *J* = 6.3 Hz, 1 H), 3.83 (dd, *J* = 12.5, 5.1 Hz, 1 H). <sup>13</sup>C NMR (CDCl<sub>3</sub>, 125 MHz) δ ppm 165.69, 165.23, 157.16, 143.20, 134.05, 134.01, 130.20 (2 carbons), 130.18 (2 carbons), 129.20, 128.95, 128.85 (2 carbons), 128.80 (2 carbons), 126.51, 125.26, 123.88, 116.26, 98.33, 69.10, 68.94, 61.72, 59.69. HRMS-ESI (m/z): [M+Na]<sup>+</sup> calcd for C<sub>25</sub>H<sub>19</sub>ClN<sub>4</sub>O<sub>8</sub>Na, 561.0784; found 561.0801.

**(2-chloro-4-nitrophenyl)-3-deoxy-3-azido-β-D-xylopyranoside (16).** According to general procedure **2.3, 47** (270 mg, 0.50 mmol) yielded **16** (119.5 mg, 66% yield) as a light yellow solid. <sup>1</sup>H NMR (CD<sub>3</sub>OD, 500 MHz) δ ppm 8.31 (d, *J* = 2.7 Hz, 1 H), 8.18 (dd, *J* = 9.0, 2.7 Hz, 1 H), 7.38 (d, *J* = 9.3 Hz, 1 H), 5.18 (d, *J* = 7.6 Hz, 1 H), 3.95 (dd, *J* = 11.2, 5.1 Hz, 1 H), 3.5 (m, 2 H), 3.50 (dd, *J* = 11.2, 10.0 Hz, 1 H), 3.40 (t, *J* = 9.5 Hz, 1 H). <sup>13</sup>C NMR (CD<sub>3</sub>OD, 125 MHz) δ ppm 157.9, 142.5, 125.6, 123.7, 123.6, 115.6, 101.1, 71.9, 69.6, 68.3, 66.6. HRMS-ESI (m/z): [M+Na]<sup>+</sup> calcd for C<sub>11</sub>H<sub>11</sub>ClN<sub>4</sub>O<sub>6</sub>Na, 353.0259; found 353.0268.

**(2-chloro-4-nitrophenyl)-3-deoxy-3-amino-β-D-xylopyranoside (17).** According to general procedure **2.4, 16** (56 mg, 0.16 mmol) yielded **17** (41.8 mg, 80% yield) as a white solid. <sup>1</sup>H NMR (CD<sub>3</sub>OD, 500 MHz) δ ppm 8.32 (d, *J* = 2.7 Hz, 1 H), 8.19 (dd, *J* = 9.2, 2.8 Hz, 1 H), 7.40 (d, *J* = 9.3 Hz, 1 H), 5.17 (d, *J* = 7.3 Hz, 1 H), 3.94 (dd, *J* = 10.9, 4.5 Hz, 1 H), 3.4 - 3.5 (m, 3 H), 2.81 (t, *J* = 9.0 Hz, 1 H). <sup>1</sup>H NMR (500 MHz, DMSO-*d*<sub>6</sub>) δ ppm 8.35 (d, *J* = 2.9 Hz, 1 H), 8.22 (dd, *J* = 9.3, 2.7 Hz, 1 H), 7.51 (d, *J* = 9.3 Hz, 1 H), 5.49 (br. s., 1 H), 5.26 (d, *J* = 7.3 Hz, 1 H), 5.15 (br. s., 1 H), 3.79 (dd, *J* = 11.0, 5.1 Hz, 1 H), 3.43 (t, *J* = 10.5 Hz, 1 H), 3.3 (m, 1H), 3.29 (t, *J* = 8.5 Hz, 1 H), 3.19 (s, 1 H), 3.19 (s, 1 H), 2.64 (t, *J* = 9.3 Hz, 1 H), 1.84 (s, 1 H). <sup>13</sup>C NMR (DMSO-*d*<sub>6</sub>, 125 MHz) δ ppm 158.3, 142.2, 126.2, 124.9, 123.1, 116.4, 101.4, 73.4, 70.0, 67.5, 60.0. HRMS-ESI (m/z): [M+H]<sup>+</sup> calcd for C<sub>11</sub>H<sub>14</sub>ClN<sub>2</sub>O<sub>6</sub>, 305.0535; found 305.0536.

**(2-chloro-4-nitrophenyl)-3-deoxy-3-amino-β-D-xylopyranoside hydrochloride (17a).** According to general procedure **2.5, 17** (2 mg, 0.006 mol) yielded **17a** (2 mg, 98% yield) as a yellow solid. <sup>1</sup>H NMR (D<sub>2</sub>O, 500 MHz) δ ppm 8.42 (d, *J* = 2.7 Hz, 1 H), 8.23 (dd, *J* = 9.2, 2.8 Hz, 1 H), 7.42 (d, *J* = 9.3 Hz, 1 H), 5.37 (d, *J* = 7.3 Hz, 1 H), 4.19 (dd, *J* = 11.5, 5.4 Hz, 1 H), 4.03 (td, *J* = 10.1, 5.4 Hz, 1 H), 3.97 (dd, *J* = 10.6, 7.4 Hz, 1 H), 3.68 (dd, *J* = 11.5, 10.5 Hz, 1 H), 3.38 (t, *J* = 10.4 Hz, 1 H). <sup>13</sup>C NMR (D<sub>2</sub>O, 125 MHz) δ ppm 157.2, 142.9, 126.5, 124.5, 123.7, 115.9, 100.7, 69.1, 66.6, 65.7, 57.8. HRMS-ESI (m/z): [M]<sup>+</sup> calcd for C<sub>11</sub>H<sub>14</sub>ClN<sub>2</sub>O<sub>6</sub>, 305.0535; found 305.0539.

### 3. 2-chloro-4-nitrophenyl glycoside library screening

**In Vitro 2-chloro-4-nitrophenyl glycoside screening with OleD variant** Reactions containing 10 μM purified wtOleD, OleD TDP-16, or OleD Loki, 2 mM UDP or 5 mM TDP, and 2 mM of (2-chloro-4-nitrophenol)-glycosides (**1-20**) in Tris-HCl (50 mM, pH 8.0) with a final volume of 100 μL were incubated at 25°C for 12 h and the absorbance of the reactions were monitored at 410 nm using a Fluostar Omega microplate reader (BMG LABTECH GmbH, Ortenberg, Germany). Reactions noted as positives based upon absorbance change where subsequently analyzed via HPLC as follows. To the reaction was added 50 μL MeOH and 50 μL H<sub>2</sub>O and the mixture filtered through MultiScreen Filter Plate (from Millipore, Billerica, MA, USA) according to manufacturer's instructions. Sugar nucleotide formation was assessed by analytical reverse-phase HPLC using an Agilent 1260 system equipped with a DAD detector with a 250 mm x 4.6 mm Gemini-NX 5μ C18 column (Phenomenex, Torrance, CA, USA) and a

linear gradient of 1% B to 71% B over 30 min, 71% B for 5 min, 71% B to 1% B over 1 min, 1% B for 4 min (Solvent A = 50 mM  $\text{PO}_4^{2-}$ , 5 mM tetrabutylammonium bisulfate, 2% acetonitrile, pH adjusted to 6.0 with KOH; Solvent B = acetonitrile); flow rate = 1 mL  $\text{min}^{-1}$ ;  $A_{254}$  nm; injection volume 10  $\mu\text{L}$ . The percent conversion was calculated based on the peak area of NDP and NDP-sugar integrated with Agilent 1260 workstation and each assay was repeated at least two times. The percentage conversion with the three enzymes and the retention time of the NDP-sugars are presented in Table S2. All 2-chloro-4-nitrophenyl aminosugar glycoside hydrochloride salts (**3a**, **5a**, **7a**, **9a**, **11a**, **13a**) were tested with OleD Loki iva the same protocol above and the percentage conversion was listed in Table S2.

**Purification and characterization of NDP-sugars.** Reactions containing 10  $\mu\text{M}$  purified OleD Loki, 2 mM UDP or 2 mM TDP, and 2 mM of 2-chloro-4-nitrophenyl glycoside (**3**, **5**, **7**, **9**, **11**, **13**, **18**, **19**) in Tris-HCl (50 mM, pH 8.0) with a final volume of 100  $\mu\text{L}$  were incubated at 25°C for 6 h. To the reactions was added 50  $\mu\text{L}$  MeOH and 50  $\mu\text{L}$   $\text{H}_2\text{O}$  and the mixtures filtered through Vivaspin 500 centrifugal concentrators. The recovered filtrate from each reaction was completely injected into reverse-phase HPLC using an Agilent 1260 system equipped with a DAD detector with a 250 mm x 4.6 mm Gemini-NX 5 $\mu$  C18 column (Phenomenex, Torrance, CA, USA) with a gradient of 1% B for 4min, 1% B to 20% B over 9 min, 20% B to 80% B over 2 min, 80% B for 7 min, 80% B to 1% B over 2 min, 1% B for 4 min (Solvent A = 50 mM triethylammonium acetate buffer, pH 7.0; Solvent B = acetonitrile; flow rate = 1 mL  $\text{min}^{-1}$ ;  $A_{254}$  nm). The sugar nucleotide peak was collected automatically by Agilent sample collector. The desired fractions were frozen at -80 °C, and lyophilized. The following samples were dissolved into 200  $\mu\text{L}$  70% acetonitrile/  $\text{H}_2\text{O}$  and submitted for mass analysis. The high resolution mass data are presented in Table S3.

**4. Single enzyme coupled reaction of 4-methylumbelliferone 54.** Reactions containing 10  $\mu\text{M}$  of purified OleD Loki, 0.1 mM UDP, 1 mM 4-methylumbelliferone **54**, and 1 mM 2-chloro-4-nitrophenyl glycosides (**1**, **2**, **3**, **5**, **7**, **9**, **11**, **13**, **18**) in Tris-HCl (50 mM, pH 8.0) with a final volume of 100  $\mu\text{L}$  were incubated at 25°C for 8 h and the fluorescence of the reactions were monitored ( $\lambda_{\text{ex}}=355$  nm;  $I_{\text{em}}=460$  nm) using a Fluostar Omega microplate reader (BMG LABTECH GmbH, Ortenberg, Germany). To the reaction was added 50  $\mu\text{L}$  MeOH and 50  $\mu\text{L}$   $\text{H}_2\text{O}$  and the mixture filtered through a MultiScreen Filter Plate (from Millipore, Billerica, MA, USA) according to manufacturer's instructions. The filtrate was analyzed for the formation of related glycosylated 4-methylumbelliferone by analytical reverse-phase HPLC using an Agilent 1260 system equipped with a DAD detector with a 250 mm x 4.6 mm Gemini-NX 5 $\mu$  C18 column (Phenomenex, Torrance, CA, USA) with a linear gradient of 1% B to 71% B over 30 min, 71% B for 5 min, 71% B to 1% B over 1 min, 1% B for 4 min (Solvent A = 50 mM  $\text{PO}_4^{2-}$ , 5 mM tetrabutylammonium bisulfate, 2% acetonitrile, pH adjusted to 6.0 with KOH; Solvent B = acetonitrile; flow rate = 1 mL  $\text{min}^{-1}$ ;  $A_{254}$  nm; injection volume 10  $\mu\text{L}$ ). Percent conversion was calculated based on the peak area of glycosylated 4-methylumbelliferone and 4-methylumbelliferone integrated with Agilent 1260 workstation and was repeated at least two times for each glycoside donor. Retention times for the glycosylated 4-methylumbelliferones are listed in Table S4.

**Purification and characterization of 4-methylumbelliferone glycosides.** Reactions containing 2.6  $\mu\text{M}$  of purified OleD Loki, 0.2 mM UDP, 2 mM 4-methylumbelliferone **54**, and 2 mM of (2-chloro-4-nitrophenyl)-glycoside (**1**, **2**, **3**, **5**, **7**, **9**, **13**) in Tris-HCl (50 mM, pH 8.0) with a final volume of 200  $\mu\text{L}$  were incubated at 25°C for 12 h. To the reactions was added 10  $\mu\text{L}$  5/1 MeOH/HCl, 40  $\mu\text{L}$  MeOH and 50  $\mu\text{L}$   $\text{H}_2\text{O}$  and the mixture filtered through Vivaspin 500 centrifugal concentrators. The entire filtrate was purified by semi-preparative reverse-phase HPLC with a Gemini C-18 (5  $\mu\text{m}$ , 250 x 10 mm) column (from Phenomenex, Torrance, California, USA) using a gradient of 5% B to 55% B over 27 min, 55% B to 100% B over 1 min, 100% B for 5 min, 100% B to 5% B over 1 min, 5% B for 4 min (A = dd $\text{H}_2\text{O}$  with 0.1% TFA; B = acetonitrile; flow rate = 5 mL  $\text{min}^{-1}$ ;  $A_{254}$  nm). The desired fractions were collected, frozen at -80 °C, and lyophilized. The recovered samples were dissolved into 200  $\mu\text{L}$  70% acetonitrile/ $\text{H}_2\text{O}$  and submitted for mass analysis. The high resolution mass data for all glycosylated 4-methylumbelliferones is presented in Table S4.

R=

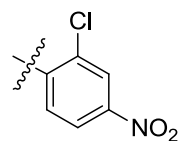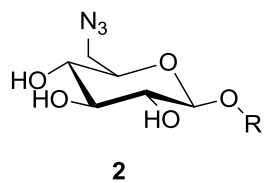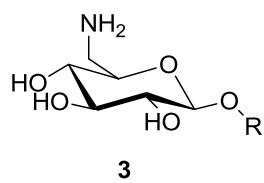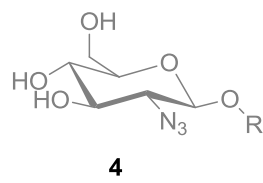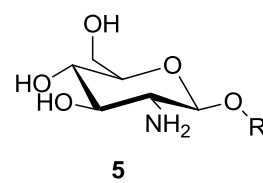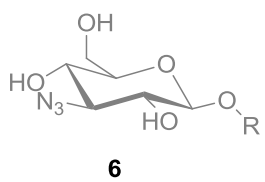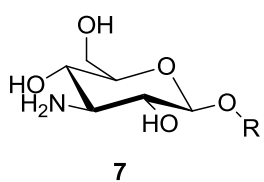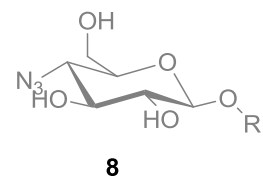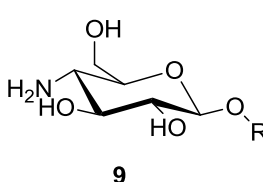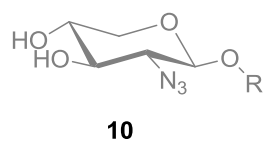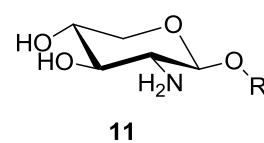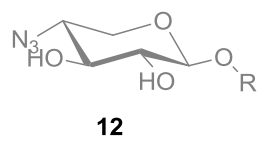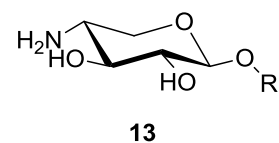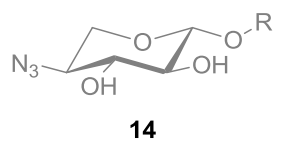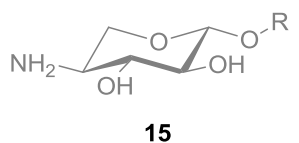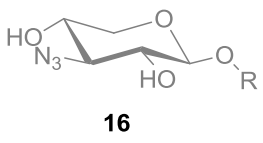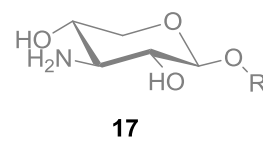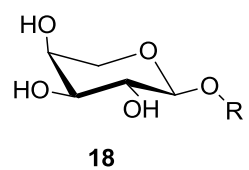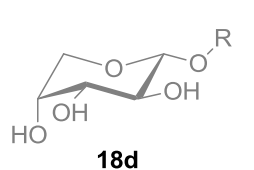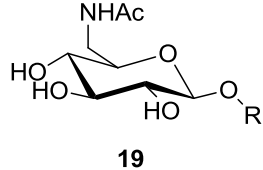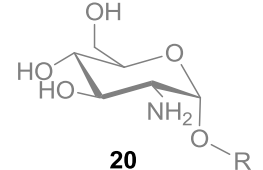

**Figure S1.** Library of synthesized 2-chloro-4-nitrophenyl glycoside donors (grey indicates no detectable turn-over in wtOleD-, OleD TDP-16-, or OleD Loki-catalyzed reactions).

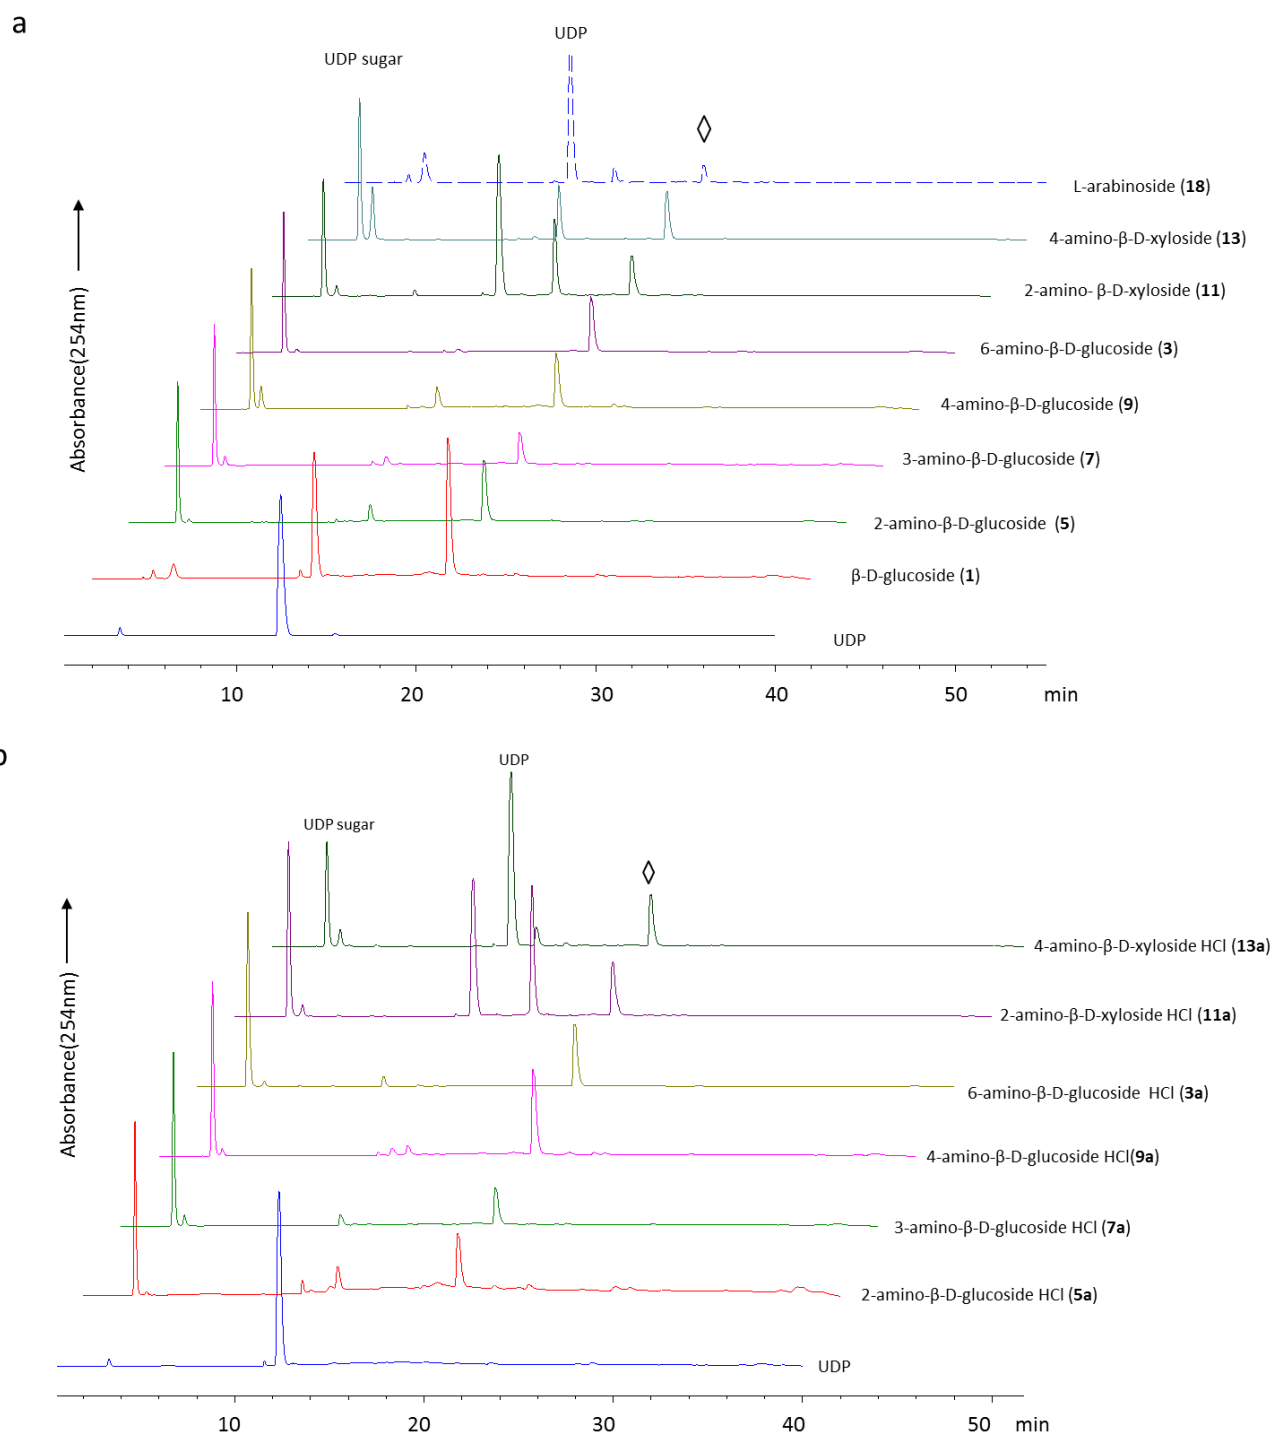

**Figure S2.** HPLC chromatograms of UDP-sugar forming reactions. Reactions contained 10  $\mu$ M purified OleD Loki, 2 mM UDP, and 2 mM of 2-chloro-4-nitrophenyl glycoside in Tris-HCl (50 mM, pH 8.0) in a final volume of 100  $\mu$ l. (a) reaction of (2-chloro-4-nitrophenyl)- $\beta$ -D-glucoside (1) and 2-chloro-4-nitrophenyl glucosamino/xylosaminosides (5, 7, 9, 3, 11, 13, 18) with UDP. (b) reaction of 2-chloro-4-nitrophenyl glucosamino/xylosaminoside hydrochloride salts (5a, 7a, 9a, 3a, 11a, 13a) with UDP. (◇) denotes the corresponding phenolate by product.

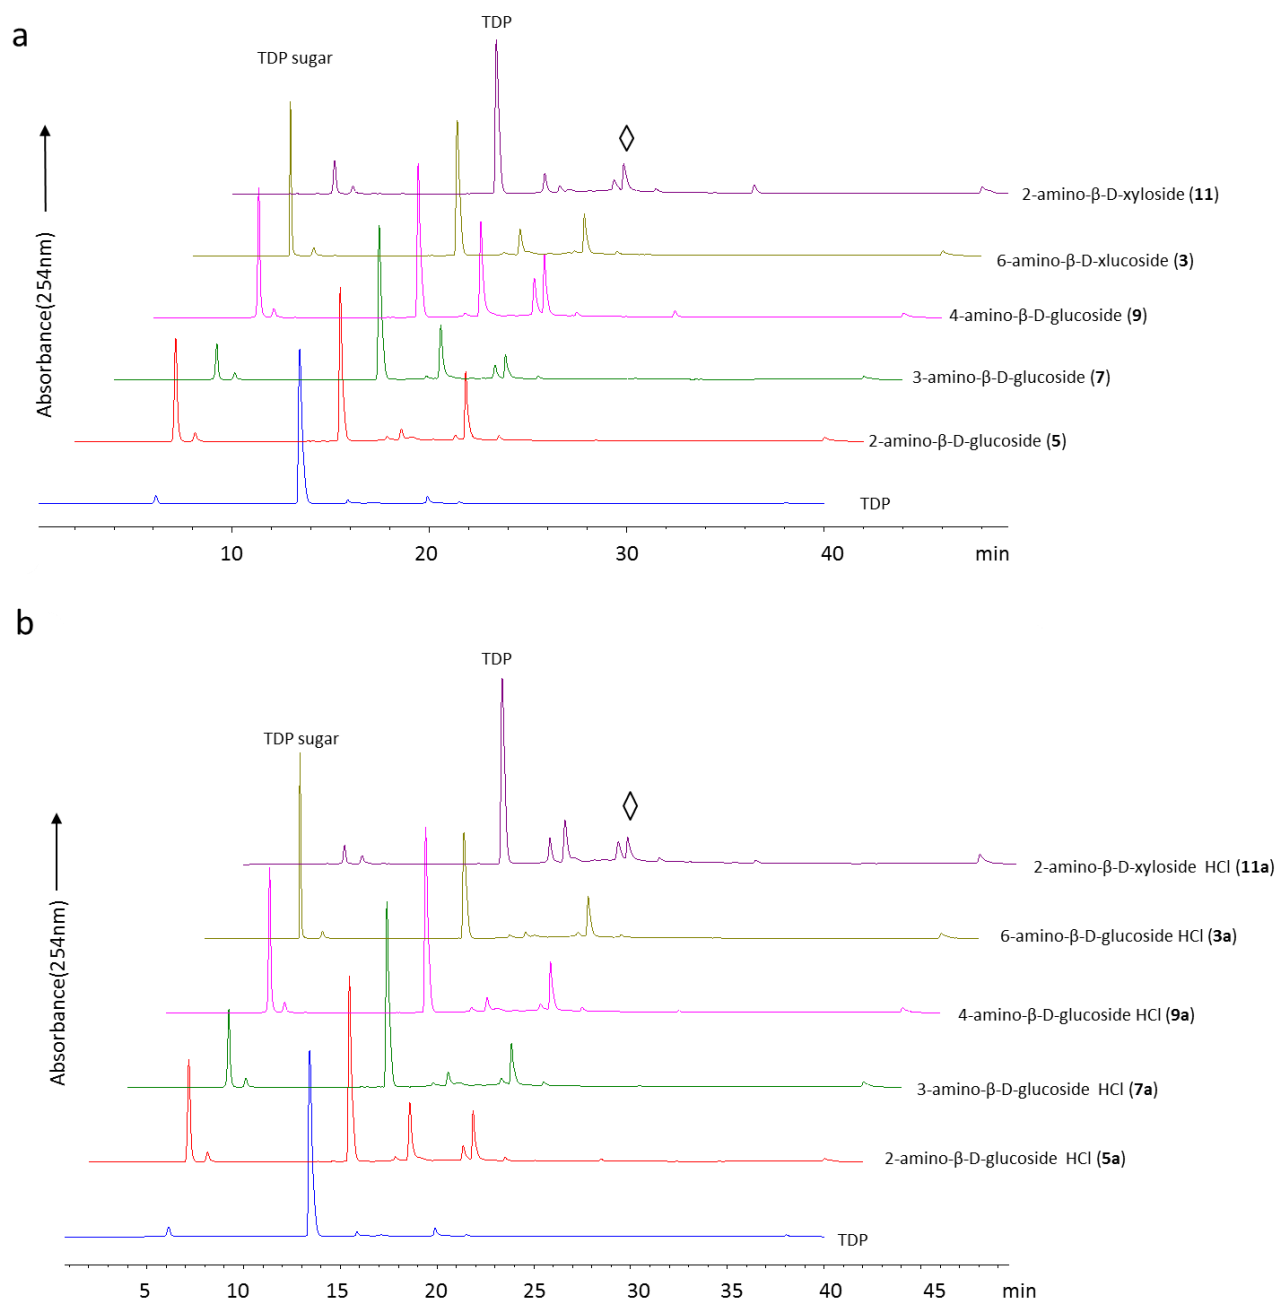

**Figure S3.** HPLC chromatograms of TDP-sugar forming reactions. Reactions contained 10  $\mu$ M purified OleD Loki, 5 mM TDP, and 2 mM of 2-chloro-4-nitrophenyl glycoside in Tris-HCl (50 mM, pH 8.0) with a final volume of 100  $\mu$ l. (a) reaction of 2-chloro-4-nitrophenyl glucosamino/xylosaminosides (**5**, **7**, **9**, **3**, **11**) with TDP; (b) reaction of 2-chloro-4-nitrophenyl glucosamino/xylosaminoside hydrochloride salts (**5a**, **7a**, **9a**, **3a**, **11a**) with TDP. (◇) denotes the phenolate by product.



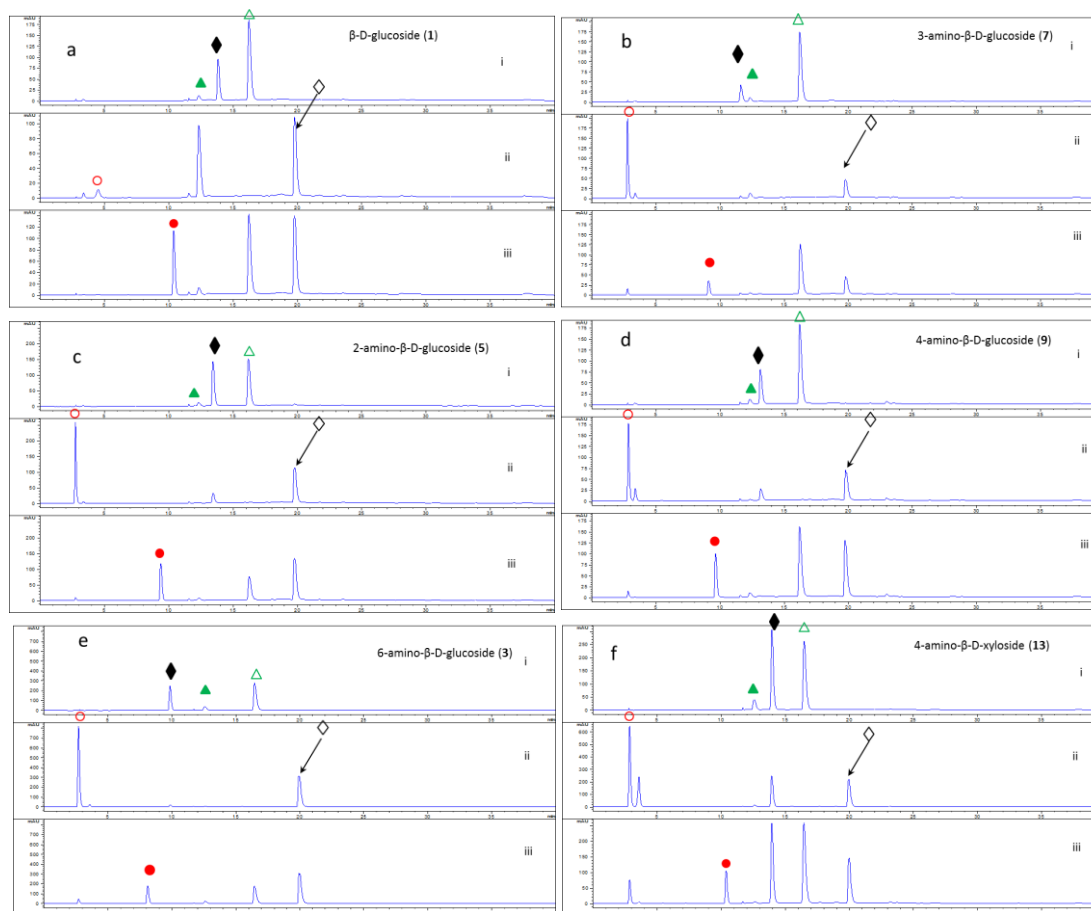

**Figure S4.** HPLC of OleD Loki-catalyzed transglycosylation reactions. For each representative series: (i) control lacking enzyme; (ii) reaction of 2 mM 2-chloro-4-nitrophenyl glycoside, 2 mM UDP, 10  $\mu$ M Loki lacking 4-methylumbelliferone in 100  $\mu$ l Tris solution (50 mM, pH 8.0); (iii) full reaction of 2 mM 2-chloro-4-nitrophenyl glycoside, 0.2 mM UDP, 2 mM 4-methylumbelliferone, and 10  $\mu$ M Loki in 100  $\mu$ l Tris solution (50 mM, pH 8.0). The series includes: (a)  $\beta$ -D-glucoside (**1**); (b) 3-amino- $\beta$ -D-glucoside (**7**); (c) 2-amino- $\beta$ -D-glucoside (**5**); (d) 4-amino- $\beta$ -D-glucoside (**9**); (e) 6-amino- $\beta$ -D-glucoside (**3**); and (f) 4-amino- $\beta$ -D-xyloside (**13**). Black closed diamonds (◆) denote 2-chloro-4-nitrophenyl glycosides, black open diamonds (◇) denote 2-chloro-4-nitrophenolate, red open circles (○) denote UDP sugar, red closed circles (●) denote 4-methylumbelliferone glycosides, green open triangles (△) denote 4-methylumbelliferone (**54**) and green closed triangles (▲) denote UDP.

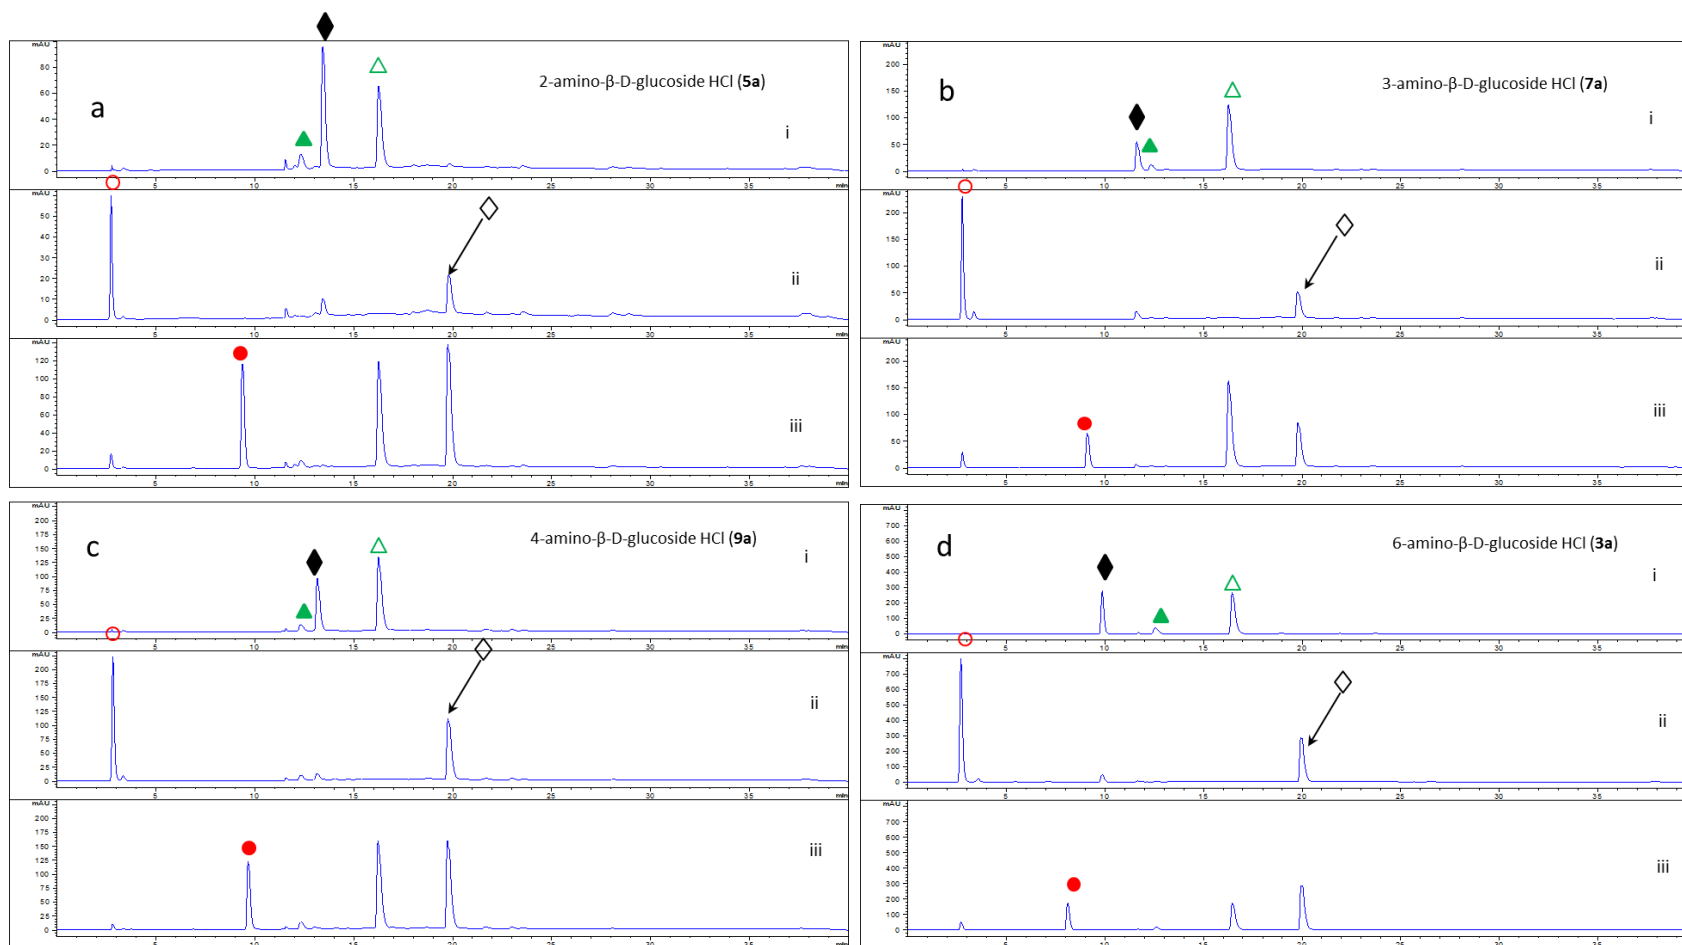

**Figure S5.** HPLC of OleD Loki-catalyzed transglycosylation with 2-chloro-4-nitrophenyl glycoside HCl salts. For the representative reaction, (i) control lacking enzyme; (ii) reaction with 2 mM 2-chloro-4-nitrophenyl glycoside HCl, 2 mM UDP, 10  $\mu$ M Loki lacking 4-methylumbelliferone in 100  $\mu$ l 50 mM Tris, pH 8.0; (iii) full reaction with 2 mM 2-chloro-4-nitrophenyl glycoside HCl, 0.2 mM UDP, 2 mM 4-methylumbelliferone, and 10  $\mu$ M Loki in 100  $\mu$ l 50 mM Tris, pH 8.0. The series includes: (a) 2-amino- $\beta$ -D-glucoside HCl (**5a**); (b) 3-amino- $\beta$ -D-glucoside HCl (**7a**); (c) 4-amino- $\beta$ -D-glucosidide HCl (**9a**); (d) 6-amino- $\beta$ -D-glucoside HCl (**3a**); Black closed diamonds (◆) denote 2-chloro-4-nitrophenyl glycosides HCl, black open diamonds (◇) denote 2-chloro-4-nitrophenolate, red open circles (○) denote **UDP sugar**, and red closed circles (●) denote **glycosylated-4-methylumbelliferone** in their respective panels. Green open triangle (△) denote 4-methylumbelliferone (**54**) and green closed triangle (▲) denote UDP.

**Table S1.** Summary of 2-chloro-4-nitrophenyl aminosugar donors syntheses.

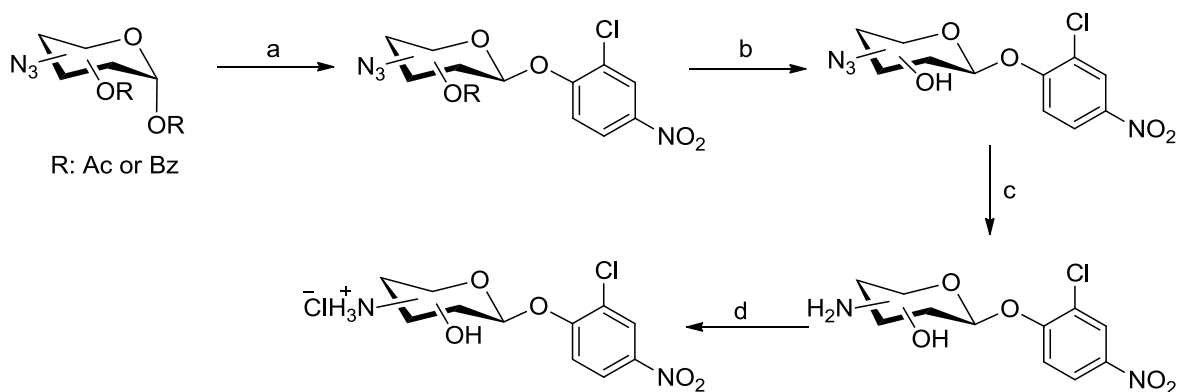

(a) (1)  $\text{TiBr}_4$ ,  $\text{CH}_2\text{Cl}_2/\text{EtOAc}$ ; (2) 2-chloro-4-nitrophenol,  $\text{Ag}_2\text{O}$ ,  $\text{CH}_3\text{CN}$ , M.S., r t, 12 h;  
 (b)  $\text{NaOMe}$ ,  $\text{MeOH}$ ; (c)  $\text{PMe}_3$ ,  $\text{THF}$ ,  $50^\circ\text{C}$  or  $\text{PPh}_3$ ,  $\text{THF}$ ,  $50^\circ\text{C}$ ; (d)  $\text{HCl}$ ,  $\text{Water}$ .

| Entry | Starting material                             | step a <sup>a</sup> | step b <sup>a</sup> | step c <sup>a</sup> | step d <sup>a</sup> |
|-------|-----------------------------------------------|---------------------|---------------------|---------------------|---------------------|
| 1     | <b>22</b> : 2-deoxy-azido-D-glucoside (OAc)   | <b>23</b> : 18%     | <b>4</b> : 99%      | <b>5</b> : 67%      | <b>5a</b> : 99%     |
| 2     | <b>24</b> : 3-deoxy-3-azido-D-glucoside (OAc) | <b>25</b> : 37%     | <b>6</b> : 64%      | <b>7</b> : 77%      | <b>7a</b> : 99%     |
| 3     | <b>26</b> : 4-deoxy-4-azido-D-glucoside (OAc) | <b>27</b> : 70%     | <b>8</b> : 86%      | <b>9</b> : 52%      | <b>9a</b> : 90%     |
| 4     | <b>28</b> : 2-deoxy-2-azido-D-xyloside (OAc)  | <b>30</b> : 24%     | <b>10</b> : 80%     | <b>11</b> : 82%     | <b>11a</b> : 87%    |
| 5     | <b>46</b> : 3-deoxy-3-azido-D-xyloside (OBz)  | <b>47</b> : 94%     | <b>12</b> : 66%     | <b>13</b> : 80%     | <b>13a</b> : 98%    |
| 6     | <b>35</b> : 4-deoxy-4-azido-D-xyloside (OBz)  | <b>39</b> : 43%     | <b>16</b> : 96%     | <b>17</b> : 47%     | <b>17a</b> : 99%    |
| 7     | <b>36</b> : 4-deoxy-4-azido-L-xyloside (OBz)  | <b>40</b> : 13%     | <b>14</b> : 95%     | <b>15</b> : 57%     | <b>15a</b> : 98%    |
| 18    | <b>41</b> : 4-deoxy-4-azido-L-xyloside (OAc)  | <b>43</b> : 22%     | <b>14</b> : 85%     | <b>15</b> : 57%     | <b>15a</b> : 98%    |

<sup>a</sup>: isolated yield

**Table S2.** Percentage conversion and retention time of the NDP-sugars.

| Entry | Compound                                               | OleD Loki      |                | OleD<br>TDP-16 | wtOleD | Retention<br>time (min) |
|-------|--------------------------------------------------------|----------------|----------------|----------------|--------|-------------------------|
|       |                                                        | A <sup>a</sup> | B <sup>b</sup> |                |        |                         |
| 1U    | UDP- $\alpha$ -D-glucose                               | 25%            | -              | 97%            | 81%    | 4.9                     |
| 2U    | UDP- $\alpha$ -6-deoxy-6-azido-D-glucose               | 92%            | -              | 96%            | 90%    | 11.7                    |
| 3U    | UDP- $\alpha$ -6-deoxy-6-amino-D-glucose               | 96%            | 100%           | 22%            | 77%    | 2.7                     |
| 5U    | UDP- $\alpha$ -2-deoxy-2-amino-D-glucose               | 100%           | 100%           | 72%            | 68%    | 2.7                     |
| 7U    | UDP- $\alpha$ -3-deoxy-3-amino-D-glucose               | 87%            | 90%            | 24%            | 1%     | 2.7                     |
| 9U    | UDP- $\alpha$ -4-deoxy-4-amino-D-glucose               | 96%            | 97%            | 58%            | 72%    | 2.8                     |
| 11U   | UDP- $\alpha$ -2-deoxy-2-amino-D-xylose                | 54%            | 54%            | 6%             | 28%    | 2.8                     |
| 13U   | UDP- $\alpha$ -4-deoxy-4-amino-D-xylose                | 88%            | 82%            | 1%             | 5%     | 2.8                     |
| 18U   | UDP- $\beta$ -L-arabinose                              | 13%            | -              | 5%             | 7%     | 4.5                     |
| 19U   | UDP- $\alpha$ -6-deoxy- <i>N</i> -acetyamino-D-glucose | 39%            | -              | 11%            | 12%    | 5.8                     |
| 1T    | TDP- $\alpha$ -D-glucose                               | 27%            | -              | 87%            | 84%    | 7.7                     |
| 2T    | TDP- $\alpha$ -6-deoxy-6-azido-D-glucose               | 56%            | -              | 93%            | 34%    | 11.9                    |
| 3T    | TDP- $\alpha$ -6-deoxy-6-amino-D-glucose               | 92%            | 100%           | 21%            | 2%     | 4.9                     |
| 5T    | TDP- $\alpha$ -2-deoxy-2-amino-D-glucose               | 97%            | 89%            | 52%            | 61%    | 5.1                     |
| 7T    | TDP- $\alpha$ -3-deoxy-3-amino-D-glucose               | 64%            | 60%            | 9%             | 7%     | 5.2                     |
| 9T    | TDP- $\alpha$ -4-deoxy-4-amino-D-glucose               | 94%            | 88%            | 52%            | 14%    | 5.3                     |
| 11T   | TDP- $\alpha$ -2-deoxy-2-amino-D-xylose                | 72%            | 76%            | 2%             | 46%    | 5.2                     |
| 13T   | TDP- $\alpha$ -4-deoxy-4-amino-D-xylose                | 69%            | 47%            | 1%             | 9%     | 5.1                     |
| 18T   | TDP- $\beta$ -L-arabinose                              | 7%             | -              | 2%             | 6%     | 8.4                     |
| 19T   | TDP- $\alpha$ -6-deoxy- <i>N</i> -acetyamino-D-glucose | 48%            | -              | 1%             | 4%     | 9.4                     |

<sup>a</sup>2-chloro-4-nitrophenyl aminosugar glycoside; <sup>b</sup>2-chloro-4-nitrophenyl aminosugar glycoside hydrochloride salt

**Table S3.** HRMS of the synthesized NDP-sugars.

| Entry | Compound                                      | Elemental Composition<br>[M+Na] <sup>+</sup>                                                  | Calculated Theoretical Mass<br>(m/z) [M+Na] <sup>+</sup> | Observed Mass<br>(m/z) [M+Na] <sup>+</sup> |
|-------|-----------------------------------------------|-----------------------------------------------------------------------------------------------|----------------------------------------------------------|--------------------------------------------|
| 3U    | UDP- $\alpha$ -6-deoxy-6-amino-D-glucose      | C <sub>15</sub> H <sub>25</sub> N <sub>3</sub> O <sub>16</sub> P <sub>2</sub> Na <sup>+</sup> | 588.0602                                                 | 588.0600                                   |
| 5U    | UDP- $\alpha$ -2-deoxy-2-amino-D-glucose      | C <sub>15</sub> H <sub>25</sub> N <sub>3</sub> O <sub>16</sub> P <sub>2</sub> Na <sup>+</sup> | 588.0602                                                 | 588.0601                                   |
| 7U    | UDP- $\alpha$ -3-deoxy-3-amino-D-glucose      | C <sub>15</sub> H <sub>25</sub> N <sub>3</sub> O <sub>16</sub> P <sub>2</sub> Na <sup>+</sup> | 588.0602                                                 | 588.0598                                   |
| 9U    | UDP- $\alpha$ -4-deoxy-4-amino-D-glucose      | C <sub>15</sub> H <sub>25</sub> N <sub>3</sub> O <sub>16</sub> P <sub>2</sub> Na <sup>+</sup> | 588.0602                                                 | 588.0600                                   |
| 11U   | UDP- $\alpha$ -2-deoxy-2-amino-D-xylose       | C <sub>14</sub> H <sub>23</sub> N <sub>3</sub> O <sub>15</sub> P <sub>2</sub> Na <sup>+</sup> | 558.0497                                                 | 558.0493                                   |
| 13U   | UDP- $\alpha$ -4-deoxy-4-amino-D-xylose       | C <sub>14</sub> H <sub>23</sub> N <sub>3</sub> O <sub>15</sub> P <sub>2</sub> Na <sup>+</sup> | 558.0497                                                 | 558.0495                                   |
| 18U   | UDP- $\beta$ -L-arabinose                     | C <sub>14</sub> H <sub>22</sub> N <sub>2</sub> O <sub>16</sub> P <sub>2</sub> Na <sup>+</sup> | 559.0337                                                 | 559.0336                                   |
| 19U   | UDP- $\alpha$ -6-deoxy-6-acetyamino-D-glucose | C <sub>17</sub> H <sub>27</sub> N <sub>3</sub> O <sub>17</sub> P <sub>2</sub> Na <sup>+</sup> | 630.0708                                                 | 630.0704                                   |
| 3T    | TDP- $\alpha$ -6-deoxy-6-amino-D-glucose      | C <sub>16</sub> H <sub>27</sub> N <sub>3</sub> O <sub>15</sub> P <sub>2</sub> Na <sup>+</sup> | 586.0810                                                 | 586.0797                                   |
| 5T    | TDP- $\alpha$ -2-deoxy-2-amino-D-glucose      | C <sub>16</sub> H <sub>27</sub> N <sub>3</sub> O <sub>15</sub> P <sub>2</sub> Na <sup>+</sup> | 586.0810                                                 | 586.0809                                   |
| 7T    | TDP- $\alpha$ -3-deoxy-3-amino-D-glucose      | C <sub>16</sub> H <sub>27</sub> N <sub>3</sub> O <sub>15</sub> P <sub>2</sub> Na <sup>+</sup> | 586.0810                                                 | 586.0811                                   |
| 9T    | TDP- $\alpha$ -4-deoxy-4-amino-D-glucose      | C <sub>16</sub> H <sub>27</sub> N <sub>3</sub> O <sub>15</sub> P <sub>2</sub> Na <sup>+</sup> | 586.0810                                                 | 586.0795                                   |
| 11T   | TDP- $\alpha$ -2-deoxy-2-amino-D-xylose       | C <sub>15</sub> H <sub>25</sub> N <sub>3</sub> O <sub>14</sub> P <sub>2</sub> Na <sup>+</sup> | 556.0704                                                 | 556.0692                                   |
| 13T   | TDP- $\alpha$ -4-deoxy-4-amino-D-xylose       | C <sub>15</sub> H <sub>25</sub> N <sub>3</sub> O <sub>14</sub> P <sub>2</sub> Na <sup>+</sup> | 556.0704                                                 | 556.0693                                   |
| 18T   | TDP- $\beta$ -L-arabinose                     | C <sub>15</sub> H <sub>24</sub> N <sub>2</sub> O <sub>15</sub> P <sub>2</sub> Na <sup>+</sup> | 557.0544                                                 | 557.0531                                   |
| 19T   | TDP- $\alpha$ -6-deoxy-6-acetyamino-D-glucose | C <sub>18</sub> H <sub>29</sub> N <sub>3</sub> O <sub>16</sub> P <sub>2</sub> Na <sup>+</sup> | 628.0915                                                 | 628.0911                                   |

|     | Compound                                      | Elemental Composition<br>[M-H] <sup>-</sup>                                                | Calculated Theoretical Mass<br>(m/z) [M-H] <sup>-</sup> | Observed Mass<br>(m/z) [M-H] <sup>-</sup> |
|-----|-----------------------------------------------|--------------------------------------------------------------------------------------------|---------------------------------------------------------|-------------------------------------------|
| 3U  | UDP- $\alpha$ -6-deoxy-6-amino-D-glucose      | C <sub>15</sub> H <sub>24</sub> N <sub>3</sub> O <sub>16</sub> P <sub>2</sub> <sup>-</sup> | 564.0637                                                | 564.0642                                  |
| 5U  | UDP- $\alpha$ -2-deoxy-2-amino-D-glucose      | C <sub>15</sub> H <sub>24</sub> N <sub>3</sub> O <sub>16</sub> P <sub>2</sub> <sup>-</sup> | 564.0637                                                | 564.0648                                  |
| 7U  | UDP- $\alpha$ -3-deoxy-3-amino-D-glucose      | C <sub>15</sub> H <sub>24</sub> N <sub>3</sub> O <sub>16</sub> P <sub>2</sub> <sup>-</sup> | 564.0637                                                | 564.0649                                  |
| 9U  | UDP- $\alpha$ -4-deoxy-4-amino-D-glucose      | C <sub>15</sub> H <sub>24</sub> N <sub>3</sub> O <sub>16</sub> P <sub>2</sub> <sup>-</sup> | 564.0637                                                | 564.0642                                  |
| 11U | UDP- $\alpha$ -2-deoxy-2-amino-D-xylose       | C <sub>14</sub> H <sub>22</sub> N <sub>3</sub> O <sub>15</sub> P <sub>2</sub> <sup>-</sup> | 534.0532                                                | 534.0534                                  |
| 13U | UDP- $\alpha$ -4-deoxy-4-amino-D-xylose       | C <sub>14</sub> H <sub>22</sub> N <sub>3</sub> O <sub>15</sub> P <sub>2</sub> <sup>+</sup> | 534.0532                                                | 534.0535                                  |
| 18U | UDP- $\beta$ -L-arabinose                     | C <sub>14</sub> H <sub>21</sub> N <sub>2</sub> O <sub>16</sub> P <sub>2</sub> <sup>-</sup> | 535.0372                                                | 535.0372                                  |
| 19U | UDP- $\alpha$ -6-deoxy-6-acetyamino-D-glucose | C <sub>17</sub> H <sub>26</sub> N <sub>3</sub> O <sub>17</sub> P <sub>2</sub> <sup>-</sup> | 606.0743                                                | 606.0751                                  |
| 3T  | TDP- $\alpha$ -6-deoxy-6-amino-D-glucose      | C <sub>16</sub> H <sub>26</sub> N <sub>3</sub> O <sub>15</sub> P <sub>2</sub> <sup>-</sup> | 562.0845                                                | 562.0853                                  |
| 5T  | TDP- $\alpha$ -2-deoxy-2-amino-D-glucose      | C <sub>16</sub> H <sub>26</sub> N <sub>3</sub> O <sub>15</sub> P <sub>2</sub> <sup>-</sup> | 562.0845                                                | 562.0849                                  |
| 7T  | TDP- $\alpha$ -3-deoxy-3-amino-D-glucose      | C <sub>16</sub> H <sub>26</sub> N <sub>3</sub> O <sub>15</sub> P <sub>2</sub> <sup>-</sup> | 562.0845                                                | 562.0849                                  |
| 9T  | TDP- $\alpha$ -4-deoxy-4-amino-D-glucose      | C <sub>16</sub> H <sub>26</sub> N <sub>3</sub> O <sub>15</sub> P <sub>2</sub> <sup>-</sup> | 562.0845                                                | 562.0851                                  |
| 11T | TDP- $\alpha$ -2-deoxy-2-amino-D-xylose       | C <sub>15</sub> H <sub>24</sub> N <sub>3</sub> O <sub>14</sub> P <sub>2</sub> <sup>-</sup> | 532.0739                                                | 532.0746                                  |
| 13T | TDP- $\alpha$ -4-deoxy-4-amino-D-xylose       | C <sub>15</sub> H <sub>24</sub> N <sub>3</sub> O <sub>14</sub> P <sub>2</sub> <sup>-</sup> | 532.0739                                                | 532.0747                                  |
| 18T | TDP- $\beta$ -L-arabinose                     | C <sub>15</sub> H <sub>23</sub> N <sub>2</sub> O <sub>15</sub> P <sub>2</sub> <sup>-</sup> | 533.0579                                                | 533.0586                                  |
| 19T | TDP- $\alpha$ -6-deoxy-6-acetyamino-D-glucose | C <sub>18</sub> H <sub>28</sub> N <sub>3</sub> O <sub>16</sub> P <sub>2</sub> <sup>-</sup> | 604.0950                                                | 604.0955                                  |

**Table S4.** Characterization data of the glycosylated 4-methylumbelliferone.

| Entry      | Conjugated sugars                  | Percentage conversion | Retention time(min) | Chemical formula                                              | HRMS-ESI(m/z)               |                             |
|------------|------------------------------------|-----------------------|---------------------|---------------------------------------------------------------|-----------------------------|-----------------------------|
|            |                                    |                       |                     |                                                               | Calculated Theoretical Mass | Observed Mass (m/z)         |
| <b>54a</b> | $\beta$ -D-glucose                 | 36%                   | 10.4                | C <sub>16</sub> H <sub>18</sub> O <sub>8</sub>                | 339.1074 [M+H] <sup>+</sup> | 339.1072 [M+H] <sup>+</sup> |
| <b>54b</b> | $\beta$ -D-6-deoxy-6-amino-glucose | 43%                   | 8.1                 | C <sub>16</sub> H <sub>19</sub> NO <sub>7</sub>               | 338.1234 [M+H] <sup>+</sup> | 338.1231 [M+H] <sup>+</sup> |
| <b>54c</b> | $\beta$ -D-6-deoxy-6-azido-glucose | 42%                   | 15.8                | C <sub>16</sub> H <sub>17</sub> N <sub>3</sub> O <sub>7</sub> | 364.1139 [M+H] <sup>+</sup> | 364.1144 [M+H] <sup>+</sup> |
| <b>54d</b> | $\beta$ -D-2-deoxy-2-amino-glucose | 53%                   | 9.4                 | C <sub>16</sub> H <sub>19</sub> NO <sub>7</sub>               | 338.1234 [M+H] <sup>+</sup> | 338.1232 [M+H] <sup>+</sup> |
| <b>54e</b> | $\beta$ -D-3-deoxy-3-amino-glucose | 22%                   | 9.1                 | C <sub>16</sub> H <sub>19</sub> NO <sub>7</sub>               | 338.1234 [M+H] <sup>+</sup> | 338.1210 [M+H] <sup>+</sup> |
| <b>54f</b> | $\beta$ -D-4-deoxy-4-amino-glucose | 37%                   | 9.4                 | C <sub>16</sub> H <sub>19</sub> NO <sub>7</sub>               | 338.1234 [M+H] <sup>+</sup> | 338.1231 [M+H] <sup>+</sup> |
| <b>54g</b> | $\beta$ -D-4-deoxy-4-amino-xylose  | 23%                   | 10.4                | C <sub>15</sub> H <sub>17</sub> NO <sub>6</sub>               | 308.1129 [M+H] <sup>+</sup> | 308.1126 [M+H] <sup>+</sup> |

**Table S5.**  $^1\text{H}$  NMR, gCOSY,  $^{13}\text{C}$  NMR of the synthesized compounds

| Entry | Compound Name                                                                                                                                             | Page |
|-------|-----------------------------------------------------------------------------------------------------------------------------------------------------------|------|
| 1     | (2-chloro-4-nitrophenyl)-6-deoxy-6-amino- $\beta$ -D-glucopyranoside ( <b>3</b> ): $^1\text{H}$ NMR ( $\text{CD}_3\text{OD}$ , 500 MHz)                   | S32  |
| 2     | (2-chloro-4-nitrophenyl)-6-deoxy-6-amino- $\beta$ -D-glucopyranoside ( <b>3</b> ): gCOSY ( $\text{CD}_3\text{OD}$ , 500 MHz)                              | S33  |
| 3     | (2-chloro-4-nitrophenyl)-6-deoxy-6-amino- $\beta$ -D-glucopyranoside ( <b>3</b> ): $^{13}\text{C}$ NMR ( $\text{D}_2\text{O}$ , 125 MHz)                  | S34  |
| 4     | (2-chloro-4-nitrophenyl)-6-deoxy-6-amino- $\beta$ -D-glucopyranoside hydrochloride ( <b>3a</b> ): $^1\text{H}$ NMR ( $\text{D}_2\text{O}$ , 500 MHz)      | S35  |
| 5     | (2-chloro-4-nitrophenyl)-6-deoxy-6-amino- $\beta$ -D-glucopyranoside hydrochloride ( <b>3a</b> ): $^{13}\text{C}$ NMR ( $\text{D}_2\text{O}$ , 125 MHz)   | S36  |
| 6     | (2-chloro-4-nitrophenyl)-2-deoxy-2-azido- $\beta$ -D-glucopyranoside ( <b>4</b> ): $^1\text{H}$ NMR ( $\text{CD}_3\text{OD}$ , 500 MHz)                   | S37  |
| 7     | (2-chloro-4-nitrophenyl)-2-deoxy-2-azido- $\beta$ -D-glucopyranoside ( <b>4</b> ): $^{13}\text{C}$ NMR ( $\text{CD}_3\text{OD}$ , 125 MHz)                | S38  |
| 8     | (2-chloro-4-nitrophenyl)-2-deoxy-2-amino- $\beta$ -D-glucopyranoside ( <b>5</b> ): $^1\text{H}$ NMR ( $\text{CD}_3\text{OD}$ , 400 MHz)                   | S39  |
| 9     | (2-chloro-4-nitrophenyl)-2-deoxy-2-amino- $\beta$ -D-glucopyranoside ( <b>5</b> ): gCOSY NMR ( $\text{CD}_3\text{OD}$ , 400 MHz)                          | S40  |
| 10    | (2-chloro-4-nitrophenyl)-2-deoxy-2-amino- $\beta$ -D-glucopyranoside ( <b>5</b> ): $^{13}\text{C}$ NMR ( $\text{CD}_3\text{OD}$ , 100 MHz)                | S41  |
| 11    | (2-chloro-4-nitrophenyl)-2-deoxy-2-amino- $\beta$ -D-glucopyranoside hydrochloride ( <b>5a</b> ): $^1\text{H}$ NMR ( $\text{CD}_3\text{OD}$ , 500 MHz)    | S42  |
| 12    | (2-chloro-4-nitrophenyl)-2-deoxy-2-amino- $\beta$ -D-glucopyranoside hydrochloride ( <b>5a</b> ): $^{13}\text{C}$ NMR ( $\text{CD}_3\text{OD}$ , 125 MHz) | S43  |
| 13    | (2-chloro-4-nitrophenyl)-3-deoxy-3-azido- $\beta$ -D-glucopyranoside ( <b>6</b> ): $^1\text{H}$ NMR ( $\text{CD}_3\text{OD}$ , 400 MHz)                   | S44  |
| 14    | (2-chloro-4-nitrophenyl)-3-deoxy-3-azido- $\beta$ -D-glucopyranoside ( <b>6</b> ): $^{13}\text{C}$ NMR ( $\text{CD}_3\text{OD}$ , 100 MHz)                | S45  |
| 15    | (2-chloro-4-nitrophenyl)-3-deoxy-3-amino- $\beta$ -D-glucopyranoside ( <b>7</b> ): $^1\text{H}$ NMR ( $\text{CD}_3\text{OD}$ , 400 MHz)                   | S46  |
| 16    | (2-chloro-4-nitrophenyl)-3-deoxy-3-amino- $\beta$ -D-glucopyranoside ( <b>7</b> ): gCOSY NMR ( $\text{CD}_3\text{OD}$ , 500 MHz)                          | S47  |
| 17    | (2-chloro-4-nitrophenyl)-3-deoxy-3-amino- $\beta$ -D-glucopyranoside ( <b>7</b> ): $^{13}\text{C}$ NMR ( $\text{DMSO}-d_6$ , 100 MHz)                     | S48  |
| 18    | (2-chloro-4-nitrophenyl)-3-deoxy-3-amino- $\beta$ -D-glucopyranoside hydrochloride ( <b>7a</b> ): $^1\text{H}$ NMR ( $\text{D}_2\text{O}$ , 500 MHz)      | S49  |
| 19    | (2-chloro-4-nitrophenyl)-3-deoxy-3-amino- $\beta$ -D-glucopyranoside hydrochloride ( <b>7a</b> ): gCOSY NMR ( $\text{D}_2\text{O}$ , 500 MHz)             | S50  |
| 20    | (2-chloro-4-nitrophenyl)-3-deoxy-3-amino- $\beta$ -D-glucopyranoside hydrochloride ( <b>7a</b> ): $^{13}\text{C}$ NMR ( $\text{D}_2\text{O}$ , 100 MHz)   | S51  |
| 21    | (2-chloro-4-nitrophenyl)-4-deoxy-4-azido- $\beta$ -D-glucopyranoside ( <b>8</b> ): $^1\text{H}$ NMR ( $\text{CD}_3\text{OD}$ , 400 MHz)                   | S52  |
| 22    | (2-chloro-4-nitrophenyl)-4-deoxy-4-azido- $\beta$ -D-glucopyranoside ( <b>8</b> ): gCOSY NMR ( $\text{CD}_3\text{OD}$ , 400 MHz)                          | S53  |
| 23    | (2-chloro-4-nitrophenyl)-4-deoxy-4-azido- $\beta$ -D-glucopyranoside ( <b>8</b> ): $^{13}\text{C}$ NMR ( $\text{CD}_3\text{OD}$ , 100 MHz)                | S54  |
| 24    | (2-chloro-4-nitrophenyl)-4-deoxy-4-amino- $\beta$ -D-glucopyranoside ( <b>9</b> ): $^1\text{H}$ NMR ( $\text{CD}_3\text{OD}$ , 400 MHz)                   | S55  |
| 25    | (2-chloro-4-nitrophenyl)-4-deoxy-4-amino- $\beta$ -D-glucopyranoside ( <b>9</b> ): gCOSY NMR ( $\text{CD}_3\text{OD}$ , 400 MHz)                          | S56  |
| 26    | (2-chloro-4-nitrophenyl)-4-deoxy-4-amino- $\beta$ -D-glucopyranoside ( <b>9</b> ): $^{13}\text{C}$ NMR ( $\text{CD}_3\text{OD}$ , 100 MHz)                | S57  |
| 27    | (2-chloro-4-nitrophenyl)-4-deoxy-4-amino- $\beta$ -D-glucopyranoside hydrochloride ( <b>9a</b> ): $^1\text{H}$ NMR ( $\text{D}_2\text{O}$ , 500 MHz)      | S58  |
| 28    | (2-chloro-4-nitrophenyl)-4-deoxy-4-amino- $\beta$ -D-glucopyranoside hydrochloride ( <b>9a</b> ): $^{13}\text{C}$ NMR ( $\text{D}_2\text{O}$ , 125 MHz)   | S59  |
| 29    | (2-chloro-4-nitrophenyl)-2-deoxy-2-azido- $\beta$ -D-xylopyranoside ( <b>10</b> ): $^1\text{H}$ NMR ( $\text{CD}_3\text{OD}$ , 500 MHz)                   | S60  |
| 30    | (2-chloro-4-nitrophenyl)-2-deoxy-2-azido- $\beta$ -D-xylopyranoside ( <b>10</b> ): gCOSY NMR ( $\text{CD}_3\text{OD}$ , 500 MHz)                          | S61  |
| 31    | (2-chloro-4-nitrophenyl)-2-deoxy-2-azido- $\beta$ -D-xylopyranoside ( <b>10</b> ): $^{13}\text{C}$ NMR ( $\text{CD}_3\text{OD}$ , 125 MHz)                | S62  |
| 32    | (2-chloro-4-nitrophenyl)-2-deoxy-2-amino- $\beta$ -D-xylopyranoside ( <b>11</b> ): $^1\text{H}$ NMR ( $\text{CD}_3\text{OD}$ , 400 MHz)                   | S63  |
| 33    | (2-chloro-4-nitrophenyl)-2-deoxy-2-amino- $\beta$ -D-xylopyranoside ( <b>11</b> ): gCOSY ( $\text{CD}_3\text{OD}$ , 400 MHz)                              | S64  |

---

|    |                                                                                                                                                         |     |
|----|---------------------------------------------------------------------------------------------------------------------------------------------------------|-----|
| 34 | (2-chloro-4-nitrophenyl)-2-deoxy-2-amino- $\beta$ -D-xylopyranoside ( <b>11</b> ): $^{13}\text{C}$ NMR ( $\text{CD}_3\text{OD}$ , 100 MHz)              | S65 |
| 35 | (2-chloro-4-nitrophenyl)-2-deoxy-2-amino- $\beta$ -D-xylopyranoside hydrochloride ( <b>11a</b> ): $^1\text{H}$ NMR ( $\text{D}_2\text{O}$ , 400 MHz)    | S66 |
| 36 | (2-chloro-4-nitrophenyl)-2-deoxy-2-amino- $\beta$ -D-xylopyranoside hydrochloride ( <b>11a</b> ): gCOSY NMR ( $\text{D}_2\text{O}$ , 400 MHz)           | S67 |
| 37 | (2-chloro-4-nitrophenyl)-2-deoxy-2-amino- $\beta$ -D-xylopyranoside hydrochloride ( <b>11a</b> ): $^{13}\text{C}$ NMR ( $\text{D}_2\text{O}$ , 100 MHz) | S68 |
| 38 | (2-chloro-4-nitrophenyl)-4-deoxy-4-azido- $\beta$ -D-xylopyranoside ( <b>12</b> ): $^1\text{H}$ NMR ( $\text{CD}_3\text{OD}$ , 400 MHz)                 | S69 |
| 39 | (2-chloro-4-nitrophenyl)-4-deoxy-4-azido- $\beta$ -D-xylopyranoside ( <b>12</b> ): gCOSY NMR ( $\text{CD}_3\text{OD}$ , 400 MHz)                        | S70 |
| 40 | (2-chloro-4-nitrophenyl)-4-deoxy-4-azido- $\beta$ -D-xylopyranoside ( <b>12</b> ): $^{13}\text{C}$ NMR ( $\text{CD}_3\text{OD}$ , 400 MHz)              | S71 |
| 41 | (2-chloro-4-nitrophenyl)-4-deoxy-4-amino- $\beta$ -D-xylopyranoside ( <b>13</b> ): $^1\text{H}$ NMR ( $\text{CD}_3\text{OD}$ , 400 MHz)                 | S72 |
| 42 | (2-chloro-4-nitrophenyl)-4-deoxy-4-amino- $\beta$ -D-xylopyranoside ( <b>13</b> ): $^{13}\text{C}$ NMR ( $\text{CD}_3\text{OD}$ , 400 MHz)              | S73 |
| 43 | (2-chloro-4-nitrophenyl)-4-deoxy-4-amino- $\beta$ -D-xylopyranoside hydrochloride ( <b>13a</b> ): $^1\text{H}$ NMR ( $\text{D}_2\text{O}$ , 400 MHz)    | S74 |
| 44 | (2-chloro-4-nitrophenyl)-4-deoxy-4-amino- $\beta$ -D-xylopyranoside hydrochloride ( <b>13a</b> ): $^{13}\text{C}$ NMR ( $\text{D}_2\text{O}$ , 100 MHz) | S75 |
| 45 | (2-chloro-4-nitrophenyl)-4-deoxy-4-azido- $\beta$ -L-xylopyranoside ( <b>14</b> ): $^1\text{H}$ NMR ( $\text{CD}_3\text{OD}$ , 400 MHz)                 | S76 |
| 46 | (2-chloro-4-nitrophenyl)-4-deoxy-4-azido- $\beta$ -L-xylopyranoside ( <b>14</b> ): gCOSY NMR ( $\text{CD}_3\text{OD}$ , 400 MHz)                        | S77 |
| 47 | (2-chloro-4-nitrophenyl)-4-deoxy-4-azido- $\beta$ -L-xylopyranoside ( <b>14</b> ): $^{13}\text{C}$ NMR ( $\text{CD}_3\text{OD}$ , 400 MHz)              | S78 |
| 48 | (2-chloro-4-nitrophenyl)-4-deoxy-4-amino- $\beta$ -L-xylopyranoside ( <b>15</b> ): $^1\text{H}$ NMR ( $\text{CD}_3\text{OD}$ , 500 MHz)                 | S79 |
| 49 | (2-chloro-4-nitrophenyl)-4-deoxy-4-amino- $\beta$ -L-xylopyranoside ( <b>15</b> ): gCOSY NMR ( $\text{CD}_3\text{OD}$ , 500 MHz)                        | S80 |
| 50 | (2-chloro-4-nitrophenyl)-4-deoxy-4-amino- $\beta$ -L-xylopyranoside ( <b>15</b> ): $^{13}\text{C}$ NMR ( $\text{CD}_3\text{OD}$ , 100 MHz)              | S81 |
| 51 | (2-chloro-4-nitrophenyl)-4-deoxy-4-amino- $\beta$ -L-xylopyranoside hydrochloride ( <b>15a</b> ): $^1\text{H}$ NMR ( $\text{D}_2\text{O}$ , 400 MHz)    | S82 |
| 52 | (2-chloro-4-nitrophenyl)-4-deoxy-4-amino- $\beta$ -L-xylopyranoside hydrochloride ( <b>15a</b> ): gCOSY NMR ( $\text{DMSO-}d_6$ , 500 MHz)              | S83 |
| 53 | (2-chloro-4-nitrophenyl)-4-deoxy-4-amino- $\beta$ -L-xylopyranoside hydrochloride ( <b>15a</b> ): $^{13}\text{C}$ NMR ( $\text{DMSO-}d_6$ , 500 MHz)    | S84 |
| 54 | (2-chloro-4-nitrophenyl)-3-deoxy-3-azido- $\beta$ -D-xylopyranoside ( <b>16</b> ): $^1\text{H}$ NMR ( $\text{CD}_3\text{OD}$ , 500 MHz)                 | S85 |
| 55 | (2-chloro-4-nitrophenyl)-3-deoxy-3-azido- $\beta$ -D-xylopyranoside ( <b>16</b> ): gCOSY NMR ( $\text{CD}_3\text{OD}$ , 500 MHz)                        | S86 |
| 56 | (2-chloro-4-nitrophenyl)-3-deoxy-3-azido- $\beta$ -D-xylopyranoside ( <b>16</b> ): $^{13}\text{C}$ NMR ( $\text{CD}_3\text{OD}$ , 125 MHz)              | S87 |
| 57 | (2-chloro-4-nitrophenyl)-3-deoxy-3-amino- $\beta$ -D-xylopyranoside ( <b>17</b> ): $^1\text{H}$ NMR ( $\text{CD}_3\text{OD}$ , 500 MHz)                 | S88 |
| 58 | (2-chloro-4-nitrophenyl)-3-deoxy-3-amino- $\beta$ -D-xylopyranoside ( <b>17</b> ): gCOSY NMR ( $\text{DMSO-}d_6$ , 500 MHz)                             | S89 |
| 59 | (2-chloro-4-nitrophenyl)-3-deoxy-3-amino- $\beta$ -D-xylopyranoside ( <b>17</b> ): $^{13}\text{C}$ NMR ( $\text{DMSO-}d_6$ , 500 MHz)                   | S90 |
| 60 | (2-chloro-4-nitrophenyl)-3-deoxy-3-amino- $\beta$ -D-xylopyranoside hydrochloride ( <b>17a</b> ): $^1\text{H}$ NMR ( $\text{D}_2\text{O}$ , 500 MHz)    | S91 |
| 61 | (2-chloro-4-nitrophenyl)-3-deoxy-3-amino- $\beta$ -D-xylopyranoside hydrochloride ( <b>17a</b> ): gCOSY NMR ( $\text{D}_2\text{O}$ , 500 MHz)           | S92 |
| 62 | (2-chloro-4-nitrophenyl)-3-deoxy-3-amino- $\beta$ -D-xylopyranoside hydrochloride ( <b>17a</b> ): $^{13}\text{C}$ NMR ( $\text{D}_2\text{O}$ , 125 MHz) | S93 |
| 63 | (2-chloro-4-nitrophenyl)- $\alpha$ -D-arabinopyranoside ( <b>18d</b> ): $^1\text{H}$ NMR ( $\text{CD}_3\text{OD}$ , 500 MHz)                            | S94 |
| 64 | (2-chloro-4-nitrophenyl)- $\beta$ -D-arabinopyranoside ( <b>18d</b> ): gCOSY NMR ( $\text{DMSO-}d_6$ , 500 MHz)                                         | S95 |
| 65 | (2-chloro-4-nitrophenyl)- $\beta$ -D-arabinopyranoside ( <b>18d</b> ): $^{13}\text{C}$ NMR ( $\text{DMSO-}d_6$ , 500 MHz)                               | S96 |
| 66 | (2-chloro-4-nitrophenyl)- $\alpha$ -L-arabinopyranoside ( <b>18</b> ): $^1\text{H}$ NMR ( $\text{CD}_3\text{OD}$ , 400 MHz)                             | S97 |

---



|     |                                                                                                                                                                   |      |
|-----|-------------------------------------------------------------------------------------------------------------------------------------------------------------------|------|
| 67  | (2-chloro-4-nitrophenyl)- $\alpha$ -L-arabinopyranoside ( <b>18</b> ): $^{13}\text{C}$ NMR (DMSO- <i>d</i> <sub>6</sub> , 100 MHz)                                | S98  |
| 68  | (2-chloro-4-nitrophenyl)-6-deoxy-6-aminoacetyl- $\beta$ -D-glucopyranoside ( <b>19</b> ): $^1\text{H}$ NMR (CD <sub>3</sub> OD, 400 MHz)                          | S99  |
| 69  | (2-chloro-4-nitrophenyl)-6-deoxy-6-aminoacetyl- $\beta$ -D-glucopyranoside ( <b>19</b> ): $^{13}\text{C}$ NMR (CD <sub>3</sub> OD, 100 MHz)                       | S100 |
| 70  | (2-chloro-4-nitrophenyl)-2-amino- $\alpha$ -D-glucopyranoside ( <b>20</b> ): $^1\text{H}$ NMR (CD <sub>3</sub> OD, 500 MHz)                                       | S101 |
| 71  | (2-chloro-4-nitrophenyl)-2-amino- $\alpha$ -D-glucopyranoside ( <b>20</b> ): gCOSY NMR (CD <sub>3</sub> OD, 500 MHz)                                              | S102 |
| 72  | (2-chloro-4-nitrophenyl)-2-amino- $\alpha$ -D-glucopyranoside ( <b>20</b> ): $^{13}\text{C}$ NMR (CD <sub>3</sub> OD, 100 MHz)                                    | S103 |
| 73  | (2-chloro-4-nitrophenyl)-3,4,6-tri- <i>O</i> -acetyl-2-deoxy-2-azido- $\beta$ -D-glucopyranoside ( <b>23</b> ): $^1\text{H}$ NMR (CDCl <sub>3</sub> , 400 MHz)    | S104 |
| 74  | (2-chloro-4-nitrophenyl)-3,4,6-tri- <i>O</i> -acetyl-2-deoxy-2-azido- $\beta$ -D-glucopyranoside ( <b>23</b> ): $^{13}\text{C}$ NMR (CDCl <sub>3</sub> , 125 MHz) | S105 |
| 75  | (2-chloro-4-nitrophenyl)-2,4,6-tri- <i>O</i> -acetyl-3-deoxy-3-azido- $\beta$ -D-glucopyranoside ( <b>25</b> ): $^1\text{H}$ NMR (CDCl <sub>3</sub> , 400 MHz)    | S106 |
| 76  | (2-chloro-4-nitrophenyl)-2,4,6-tri- <i>O</i> -acetyl-3-deoxy-3-azido- $\beta$ -D-glucopyranoside ( <b>25</b> ): gCOSY NMR (CDCl <sub>3</sub> , 400 MHz)           | S107 |
| 77  | (2-chloro-4-nitrophenyl)-2,4,6-tri- <i>O</i> -acetyl-3-deoxy-3-azido- $\beta$ -D-glucopyranoside ( <b>25</b> ): $^{13}\text{H}$ NMR (CDCl <sub>3</sub> , 100 MHz) | S108 |
| 78  | (2-chloro-4-nitrophenyl)-2,3,6-tri- <i>O</i> -acetyl-4-deoxy-4-azido- $\beta$ -D-glucopyranoside ( <b>27</b> ): $^1\text{H}$ NMR (CDCl <sub>3</sub> , 500 MHz)    | S109 |
| 79  | (2-chloro-4-nitrophenyl)-2,3,6-tri- <i>O</i> -acetyl-4-deoxy-4-azido- $\beta$ -D-glucopyranoside ( <b>27</b> ): $^{13}\text{C}$ NMR (CDCl <sub>3</sub> , 500 MHz) | S110 |
| 80  | 1-bromo-3,4-di- <i>O</i> -acetyl-2-deoxy-2-azido- $\alpha$ -D-xylopyranoside ( <b>29</b> ): $^1\text{H}$ NMR (CDCl <sub>3</sub> , 400 MHz)                        | S111 |
| 81  | 1-bromo-3,4-di- <i>O</i> -acetyl-2-deoxy-2-azido- $\alpha$ -D-xylopyranoside ( <b>29</b> ): gCOSY NMR (CDCl <sub>3</sub> , 400 MHz)                               | S112 |
| 82  | 1-bromo-3,4-di- <i>O</i> -acetyl-2-deoxy-2-azido- $\alpha$ -D-xylopyranoside ( <b>29</b> ): $^{13}\text{C}$ NMR (CDCl <sub>3</sub> , 100 MHz)                     | S113 |
| 83  | (2-chloro-4-nitrophenyl)-3,4-di- <i>O</i> -acetyl-2-deoxy-2-azido- $\beta$ -D-xylopyranoside ( <b>30</b> ): $^1\text{H}$ NMR (CDCl <sub>3</sub> , 400 MHz)        | S114 |
| 84  | (2-chloro-4-nitrophenyl)-3,4-di- <i>O</i> -acetyl-2-deoxy-2-azido- $\beta$ -D-xylopyranoside ( <b>30</b> ): gCOSY NMR (CDCl <sub>3</sub> , 400 MHz)               | S115 |
| 85  | (2-chloro-4-nitrophenyl)-3,4-di- <i>O</i> -acetyl-2-deoxy-2-azido- $\beta$ -D-xylopyranoside ( <b>30</b> ): $^{13}\text{C}$ NMR (CDCl <sub>3</sub> , 100 MHz)     | S116 |
| 86  | 1,2,3-tri- <i>O</i> -benzoyl- $\beta$ -L-arabinopyranoside ( <b>31</b> ): $^1\text{H}$ NMR (CDCl <sub>3</sub> , 500 MHz)                                          | S117 |
| 87  | 1,2,3-tri- <i>O</i> -benzoyl- $\beta$ -L-arabinopyranoside ( <b>31</b> ): $^{13}\text{C}$ NMR (CDCl <sub>3</sub> , 100 MHz)                                       | S118 |
| 88  | 1,2,3-tri- <i>O</i> -benzoyl- $\beta$ -D-arabinopyranoside ( <b>32</b> ): $^1\text{H}$ NMR (CDCl <sub>3</sub> , 500 MHz)                                          | S119 |
| 89  | 1,2,3-tri- <i>O</i> -benzoyl- $\beta$ -D-arabinopyranoside ( <b>32</b> ): gCOSY NMR (CDCl <sub>3</sub> , 500 MHz)                                                 | S120 |
| 90  | 1,2,3-tri- <i>O</i> -benzoyl- $\beta$ -D-arabinopyranoside ( <b>32</b> ): $^{13}\text{C}$ NMR (CDCl <sub>3</sub> , 100 MHz)                                       | S121 |
| 91  | 1,2,3,4-tetra- <i>O</i> -benzoyl- $\beta$ -L-arabinopyranoside ( <b>33</b> ): $^1\text{H}$ NMR (CDCl <sub>3</sub> , 500 MHz)                                      | S122 |
| 92  | 1,2,3,4-tetra- <i>O</i> -benzoyl- $\beta$ -L-arabinopyranoside ( <b>33</b> ): $^{13}\text{C}$ NMR (CDCl <sub>3</sub> , 100 MHz)                                   | S123 |
| 93  | 1,2,3,4-tetra- <i>O</i> -benzoyl- $\alpha$ -D-arabinopyranoside ( <b>34</b> ): $^1\text{H}$ NMR (CDCl <sub>3</sub> , 400 MHz)                                     | S124 |
| 94  | 1,2,3,4-tetra- <i>O</i> -benzoyl- $\alpha$ -D-arabinopyranoside ( <b>34</b> ): gCOSY NMR (CDCl <sub>3</sub> , 400 MHz)                                            | S125 |
| 95  | 1,2,3,4-tetra- <i>O</i> -benzoyl- $\alpha$ -D-arabinopyranoside ( <b>34</b> ): $^{13}\text{C}$ NMR (CDCl <sub>3</sub> , 100 MHz)                                  | S126 |
| 96  | 1,2,3-tri- <i>O</i> -benzoyl-4-deoxy-4-azido- $\alpha$ -D-xylopyranoside ( <b>35</b> ): $^1\text{H}$ NMR (CDCl <sub>3</sub> , 500 MHz)                            | S127 |
| 97  | 1,2,3-tri- <i>O</i> -benzoyl-4-deoxy-4-azido- $\alpha$ -D-xylopyranoside ( <b>35</b> ): $^{13}\text{C}$ NMR (CDCl <sub>3</sub> , 100 MHz)                         | S128 |
| 98  | 1,2,3-tri- <i>O</i> -benzoyl-4-deoxy-4-azido- $\alpha$ -L-xylopyranoside ( <b>36</b> ): $^1\text{H}$ NMR (CDCl <sub>3</sub> , 500 MHz)                            | S129 |
| 99  | 1,2,3-tri- <i>O</i> -benzoyl-4-deoxy-4-azido- $\alpha$ -L-xylopyranoside ( <b>36</b> ): gCOSY NMR (CDCl <sub>3</sub> , 500 MHz)                                   | S130 |
| 100 | 1,2,3-tri- <i>O</i> -benzoyl-4-deoxy-4-azido- $\alpha$ -L-xylopyranoside ( <b>36</b> ): $^{13}\text{C}$ NMR (CDCl <sub>3</sub> , 125 MHz)                         | S131 |

|     |                                                                                                                                                               |      |
|-----|---------------------------------------------------------------------------------------------------------------------------------------------------------------|------|
| 101 | 1-bromo-2,3-di- <i>O</i> -benzoyl-4-deoxy-4-azido- $\alpha$ -D-xylopyranoside ( <b>37</b> ): $^1\text{H}$ NMR ( $\text{CD}_3\text{Cl}$ , 400 MHz)             | S132 |
| 102 | 1-bromo-2,3-di- <i>O</i> -benzoyl-4-deoxy-4-azido- $\alpha$ -D-xylopyranoside ( <b>37</b> ): $^{13}\text{C}$ NMR ( $\text{CD}_3\text{Cl}$ , 100 MHz)          | S133 |
| 103 | 1-bromo-2,3-di- <i>O</i> -benzoyl-4-deoxy-4-azido- $\alpha$ -L-xylopyranoside ( <b>38</b> ): $^1\text{H}$ NMR ( $\text{CDCl}_3$ , 400 MHz)                    | S134 |
| 104 | 1-bromo-2,3-di- <i>O</i> -benzoyl-4-deoxy-4-azido- $\alpha$ -L-xylopyranoside ( <b>38</b> ): $^{13}\text{C}$ NMR ( $\text{CDCl}_3$ , 100 MHz)                 | S135 |
| 105 | (2-chloro-4-nitrophenyl)-2,3-di- <i>O</i> -benzoyl-4-deoxy-4-azido- $\beta$ -D-xylopyranoside ( <b>39</b> ): $^1\text{H}$ NMR ( $\text{CDCl}_3$ , 400 MHz)    | S136 |
| 106 | (2-chloro-4-nitrophenyl)-2,3-di- <i>O</i> -benzoyl-4-deoxy-4-azido- $\beta$ -D-xylopyranoside ( <b>39</b> ): $^{13}\text{C}$ NMR ( $\text{CDCl}_3$ , 100 MHz) | S137 |
| 107 | (2-chloro-4-nitrophenyl)-4-deoxy-4-azido-2,3-di- <i>O</i> -benzoyl- $\beta$ -L-xylopyranoside ( <b>40</b> ): $^1\text{H}$ NMR ( $\text{CDCl}_3$ , 500 MHz)    | S138 |
| 108 | (2-chloro-4-nitrophenyl)-4-deoxy-4-azido-2,3-di- <i>O</i> -benzoyl- $\beta$ -L-xylopyranoside ( <b>40</b> ): $^{13}\text{C}$ NMR ( $\text{CDCl}_3$ , 125 MHz) | S139 |
| 109 | 1,2,3-tri- <i>O</i> -acetyl-4-deoxy-4-azido-L-xylopyranoside ( <b>41</b> ): $^1\text{H}$ NMR ( $\text{CDCl}_3$ , 500 MHz)                                     | S140 |
| 110 | 1,2,3-tri- <i>O</i> -acetyl-4-deoxy-4-azido-L-xylopyranoside ( <b>41</b> ): gCOSY NMR ( $\text{CDCl}_3$ , 500 MHz)                                            | S141 |
| 111 | 1,2,3-tri- <i>O</i> -acetyl-4-deoxy-4-azido-L-xylopyranoside ( <b>41</b> ): $^{13}\text{C}$ NMR ( $\text{CDCl}_3$ , 125 MHz)                                  | S142 |
| 112 | 1-bromo-2,3-di- <i>O</i> -acetyl-4-deoxy-4-azido- $\alpha$ -L-xylopyranoside ( <b>42</b> ): $^1\text{H}$ NMR ( $\text{CDCl}_3$ , 400 MHz)                     | S143 |
| 113 | 1-bromo-2,3-di- <i>O</i> -acetyl-4-deoxy-4-azido- $\alpha$ -L-xylopyranoside ( <b>42</b> ): gCOSY NMR ( $\text{CDCl}_3$ , 400 MHz)                            | S144 |
| 114 | 1-bromo-2,3-di- <i>O</i> -acetyl-4-deoxy-4-azido- $\alpha$ -L-xylopyranoside ( <b>42</b> ): $^{13}\text{C}$ NMR ( $\text{CDCl}_3$ , 100 MHz)                  | S145 |
| 115 | (2-chloro-4-nitrophenyl)-4-deoxy-4-azido-2,3-di- <i>O</i> -acetyl- $\beta$ -L-xylopyranoside ( <b>43</b> ): $^1\text{H}$ NMR ( $\text{CDCl}_3$ , 500 MHz)     | S146 |
| 116 | (2-chloro-4-nitrophenyl)-4-deoxy-4-azido-2,3-di- <i>O</i> -acetyl- $\beta$ -L-xylopyranoside ( <b>43</b> ): gCOSY NMR ( $\text{CDCl}_3$ , 500 MHz)            | S147 |
| 117 | (2-chloro-4-nitrophenyl)-4-deoxy-4-azido-2,3-di- <i>O</i> -acetyl- $\beta$ -L-xylopyranoside ( <b>43</b> ): $^{13}\text{C}$ NMR ( $\text{CDCl}_3$ , 125 MHz)  | S148 |
| 118 | 1,2,3,4-tetra- <i>O</i> -benzoyl- $\alpha$ -D-ribofuranoside ( <b>44</b> ): $^1\text{H}$ NMR ( $\text{CDCl}_3$ , 500 MHz)                                     | S149 |
| 119 | 1,2,3,4-tetra- <i>O</i> -benzoyl- $\alpha$ -D-ribofuranoside ( <b>44</b> ): gCOSY NMR ( $\text{CDCl}_3$ , 500 MHz)                                            | S150 |
| 120 | 1,2,3,4-tetra- <i>O</i> -benzoyl- $\alpha$ -D-ribofuranoside ( <b>44</b> ): $^{13}\text{C}$ NMR ( $\text{CDCl}_3$ , 100 MHz)                                  | S151 |
| 121 | 1,2,4-tri- <i>O</i> -benzoyl- $\alpha$ -D-ribofuranoside ( <b>45a</b> ): $^1\text{H}$ NMR ( $\text{CDCl}_3$ , 500 MHz)                                        | S152 |
| 122 | 1,2,4-tri- <i>O</i> -benzoyl- $\alpha$ -D-ribofuranoside ( <b>45a</b> ): gCOSY NMR ( $\text{CDCl}_3$ , 500 MHz)                                               | S153 |
| 123 | 1,2,4-tri- <i>O</i> -benzoyl- $\alpha$ -D-ribofuranoside ( <b>45a</b> ): $^{13}\text{C}$ NMR ( $\text{CDCl}_3$ , 100 MHz)                                     | S154 |
| 124 | 1,3,4-tri- <i>O</i> -benzoyl- $\alpha$ -D-ribofuranoside ( <b>45b</b> ): $^1\text{H}$ NMR ( $\text{CDCl}_3$ , 500 MHz)                                        | S155 |
| 125 | 1,3,4-tri- <i>O</i> -benzoyl- $\alpha$ -D-ribofuranoside ( <b>45b</b> ): gCOSY NMR ( $\text{CDCl}_3$ , 500 MHz)                                               | S156 |
| 126 | 1,3,4-tri- <i>O</i> -benzoyl- $\alpha$ -D-ribofuranoside ( <b>45b</b> ): $^{13}\text{C}$ NMR ( $\text{CDCl}_3$ , 125 MHz)                                     | S157 |
| 127 | 1,2,3-tri- <i>O</i> -benzoyl- $\alpha$ -D-ribofuranoside ( <b>45c</b> ): $^1\text{H}$ NMR ( $\text{CDCl}_3$ , 500 MHz)                                        | S158 |
| 128 | 1,2,3-tri- <i>O</i> -benzoyl- $\alpha$ -D-ribofuranoside ( <b>45c</b> ): gCOSY NMR ( $\text{CDCl}_3$ , 500 MHz)                                               | S159 |
| 129 | 1,2,3-tri- <i>O</i> -benzoyl- $\alpha$ -D-ribofuranoside ( <b>45c</b> ): $^{13}\text{C}$ NMR ( $\text{CDCl}_3$ , 125 MHz)                                     | S160 |
| 130 | 1,2,3-tri- <i>O</i> -benzoyl- $\alpha$ -D-ribofuranoside ( <b>45d</b> ): $^1\text{H}$ NMR ( $\text{CDCl}_3$ , 500 MHz)                                        | S161 |
| 131 | 1,2,3-tri- <i>O</i> -benzoyl- $\alpha$ -D-ribofuranoside ( <b>45d</b> ): gCOSY NMR ( $\text{CDCl}_3$ , 125 MHz)                                               | S162 |
| 132 | 1,2,3-tri- <i>O</i> -benzoyl- $\alpha$ -D-ribofuranoside ( <b>45d</b> ): $^{13}\text{C}$ NMR ( $\text{CDCl}_3$ , 125 MHz)                                     | S163 |
| 133 | 3-deoxy-3-azido-1,2,4-tri- <i>O</i> -benzoyl-D-xylopyranoside ( <b>46</b> ): $^1\text{H}$ NMR ( $\text{CDCl}_3$ , 500 MHz)                                    | S164 |
| 134 | 3-deoxy-3-azido-1,2,4-tri- <i>O</i> -benzoyl-D-xylopyranoside ( <b>46</b> ): gCOSY NMR ( $\text{CDCl}_3$ , 500 MHz)                                           | S165 |

|     |                                                                                                                                                      |      |
|-----|------------------------------------------------------------------------------------------------------------------------------------------------------|------|
| 135 | 3-deoxy-3-azido-1,2,4-tri-O-benzoyl-D-xylopyranoside ( <b>46</b> ): $^{13}\text{C}$ NMR ( $\text{CDCl}_3$ , 125 MHz)                                 | S166 |
| 136 | (2-chloro-4-nitrophenyl)-3-deoxy-3-azido-2,4-di-O-benzoyl- $\beta$ -D-xylopyranoside ( <b>47</b> ): $^1\text{H}$ NMR ( $\text{CDCl}_3$ , 500 MHz)    | S167 |
| 137 | (2-chloro-4-nitrophenyl)-3-deoxy-3-azido-2,4-di-O-benzoyl- $\beta$ -D-xylopyranoside ( <b>47</b> ): gCOSY NMR ( $\text{CDCl}_3$ , 500 MHz)           | S168 |
| 138 | (2-chloro-4-nitrophenyl)-3-deoxy-3-azido-2,4-di-O-benzoyl- $\beta$ -D-xylopyranoside ( <b>47</b> ): $^{13}\text{C}$ NMR ( $\text{CDCl}_3$ , 125 MHz) | S169 |
| 139 | 1-bromo-2,3,4-tri-O-benzoyl- $\beta$ -L-arabinopyranoside ( <b>48</b> ): $^1\text{H}$ NMR ( $\text{CDCl}_3$ , 500 MHz)                               | S170 |
| 140 | 1-bromo-2,3,4-tri-O-benzoyl- $\beta$ -L-arabinopyranoside ( <b>48</b> ): $^{13}\text{C}$ NMR ( $\text{CDCl}_3$ , 100 MHz)                            | S171 |
| 141 | 1-bromo-2,3,4-tri-O-benzoyl- $\alpha$ -D-arabinopyranoside ( <b>49</b> ): $^1\text{H}$ NMR ( $\text{CDCl}_3$ , 400 MHz)                              | S172 |
| 142 | 1-bromo-2,3,4-tri-O-benzoyl- $\alpha$ -D-arabinopyranoside ( <b>49</b> ): gCOSY NMR ( $\text{CDCl}_3$ , 400 MHz)                                     | S173 |
| 143 | 1-bromo-2,3,4-tri-O-benzoyl- $\alpha$ -D-arabinopyranoside ( <b>49</b> ): $^{13}\text{C}$ NMR ( $\text{CDCl}_3$ , 100 MHz)                           | S174 |
| 144 | (2-chloro-4-nitrophenyl)-2,3,4-tri-O-benzoyl- $\alpha$ -L-arabinopyranoside ( <b>50</b> ): $^1\text{H}$ NMR ( $\text{CDCl}_3$ , 500 MHz)             | S175 |
| 145 | (2-chloro-4-nitrophenyl)-2,3,4-tri-O-benzoyl- $\alpha$ -L-arabinopyranoside ( <b>50</b> ): $^{13}\text{C}$ NMR ( $\text{CDCl}_3$ , 100 MHz)          | S176 |
| 146 | (2-chloro-4-nitrophenyl)-2,3,4-tri-O-benzoyl- $\beta$ -D-arabinopyranoside ( <b>51</b> ): $^1\text{H}$ NMR ( $\text{CDCl}_3$ , 500 MHz)              | S177 |
| 147 | (2-chloro-4-nitrophenyl)-2,3,4-tri-O-benzoyl- $\beta$ -D-arabinopyranoside ( <b>51</b> ): gCOSY ( $\text{CDCl}_3$ , 500 MHz)                         | S178 |
| 148 | (2-chloro-4-nitrophenyl)-2,3,4-tri-O-benzoyl- $\beta$ -D-arabinopyranoside ( <b>51</b> ): $^{13}\text{C}$ NMR ( $\text{CDCl}_3$ , 125 MHz)           | S179 |
| 149 | 1,2,3,4-tetra-O-benzoyl- $\alpha$ -L-arabinopyranoside ( <b>52</b> ): $^1\text{H}$ NMR ( $\text{CDCl}_3$ , 500 MHz)                                  | S180 |
| 150 | 1,2,3,4-tetra-O-benzoyl- $\alpha$ -L-arabinopyranoside ( <b>52</b> ): $^{13}\text{C}$ NMR ( $\text{CDCl}_3$ , 100 MHz)                               | S181 |
| 151 | 1,2,3,4-tetra-O-benzoyl- $\beta$ -D-arabinopyranoside ( <b>53</b> ): $^1\text{H}$ NMR ( $\text{CDCl}_3$ , 500 MHz)                                   | S182 |
| 152 | 1,2,3,4-tetra-O-benzoyl- $\beta$ -D-arabinopyranoside ( <b>53</b> ): gCOSY NMR ( $\text{CDCl}_3$ , 500 MHz)                                          | S183 |
| 153 | 1,2,3,4-tetra-O-benzoyl- $\beta$ -D-arabinopyranoside ( <b>53</b> ): $^{13}\text{C}$ NMR ( $\text{CDCl}_3$ , 125 MHz)                                | S184 |

## Supplementary References.

- [S1] R. W. Gantt, P. Peltier-Pain, W. J. Cournoyer, J. S. Throson, *Nat. Chem. Biol.* **2011**, *7*, 685-691.
- [S2] S. Masuko, S. Bera, D. E. Green, M. Weiwer, J. Liui, P. L. DeAngelis, R. J. Linhardt, *J. Org. Chem.* **2012**, *77*, 1449-1456.
- [S3] V. L. Campo, R. Sesti-Costa, Z. A. Carneiro, J. S. Silva, S. Schenkman, I. Carvalho. *Bioorg. Med. Chem.* **2012**, *20*, 145-156.
- [S4] E. V. Dijkum, R. Danac, D. J. Hughes, R. Wood, A. Rees, B. L. Wilkinson, A. J. Fairbanks, *Org. Biomol. Chem.* **2009**, *7*, 1097-1105.
- [S5] J. Zhang, J. S. Thorson, Unpublished result.

(2-chloro-4-nitrophenyl)-6-deoxy-6-amino- $\beta$ -D-glucopyranoside (**3**):  $^1\text{H}$  NMR ( $\text{CD}_3\text{OD}$ , 500 MHz)

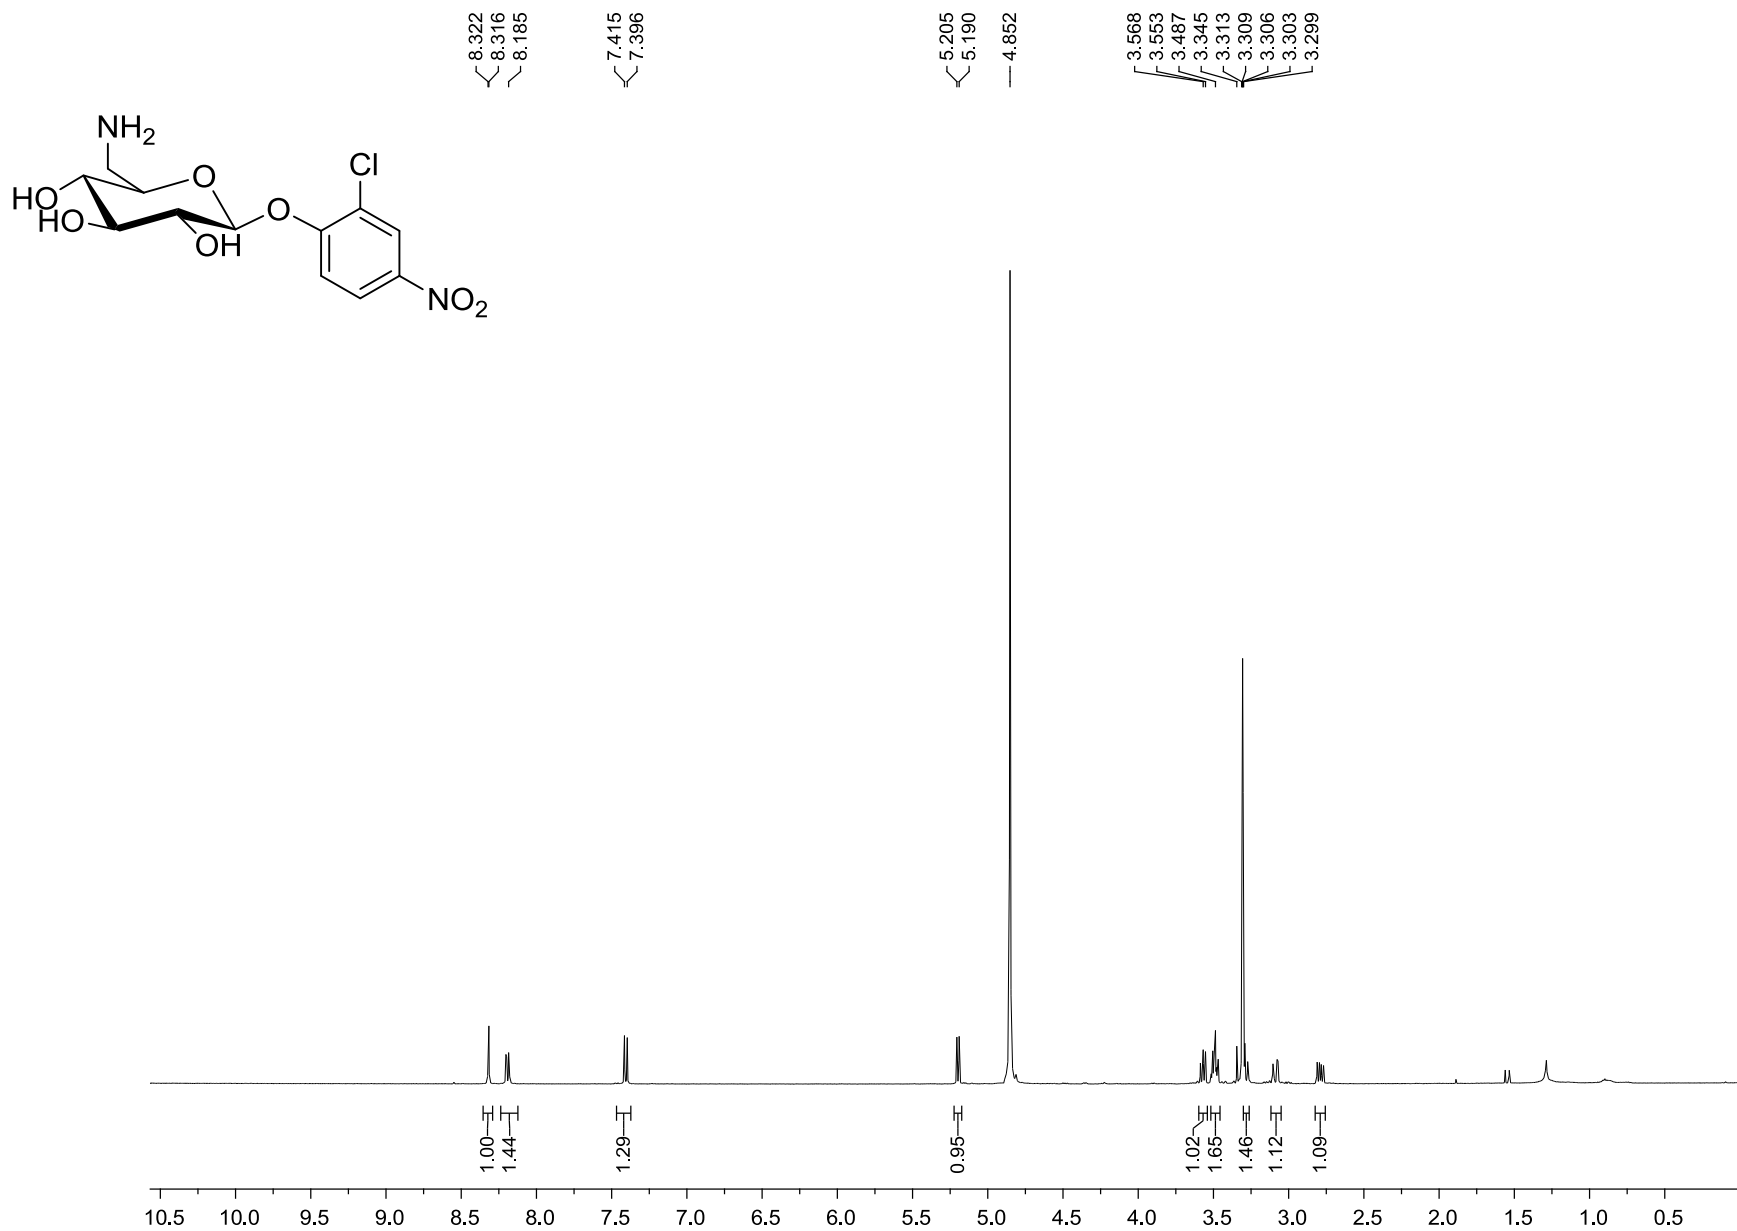

(2-chloro-4-nitrophenyl)-6-deoxy-6-amino-β-D-glucopyranoside (**3**): gCOSY (CD<sub>3</sub>OD, 500 MHz)

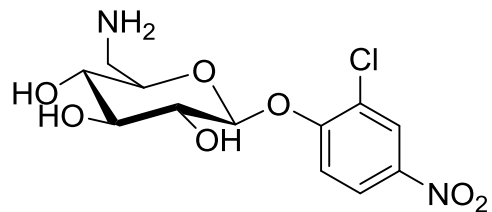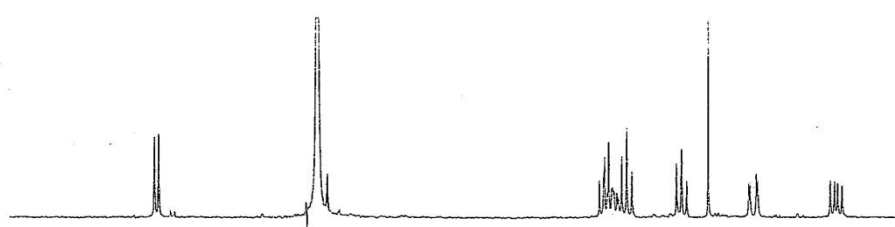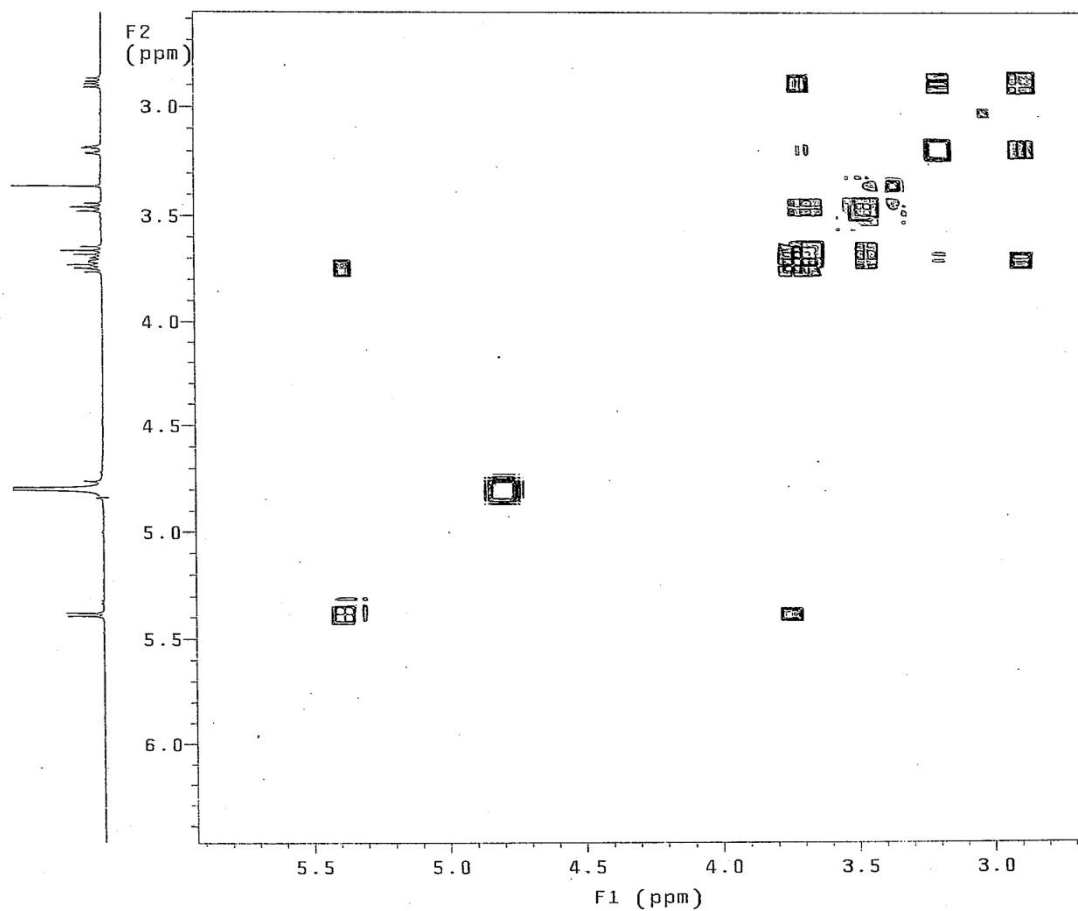

S33

(2-chloro-4-nitrophenyl)-6-deoxy-6-amino- $\beta$ -D-glucopyranoside (**3**):  $^{13}\text{C}$  NMR ( $\text{D}_2\text{O}$ , 125 MHz)

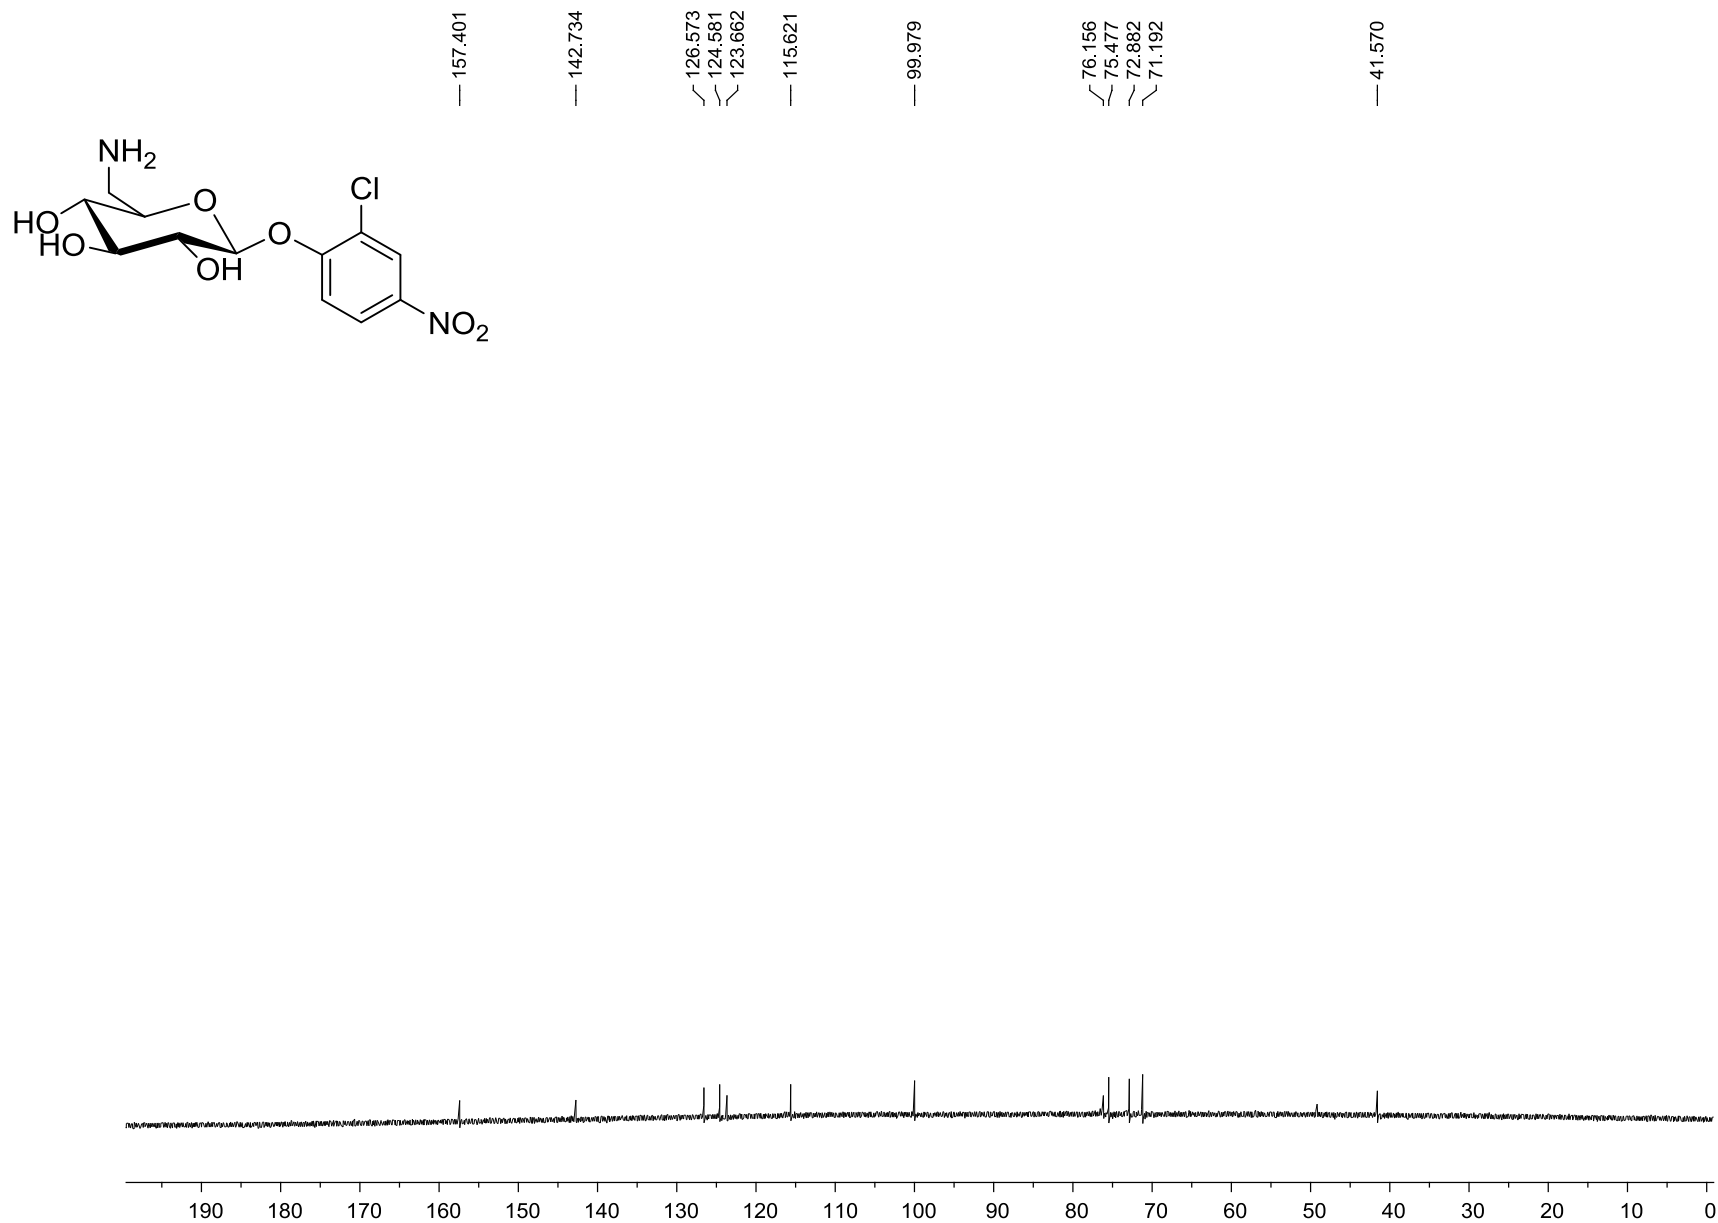

(2-chloro-4-nitrophenyl)-6-deoxy-6-amino-β-D-glucopyranoside hydrochloride (**3a**): <sup>1</sup>H NMR (D<sub>2</sub>O, 500 MHz)

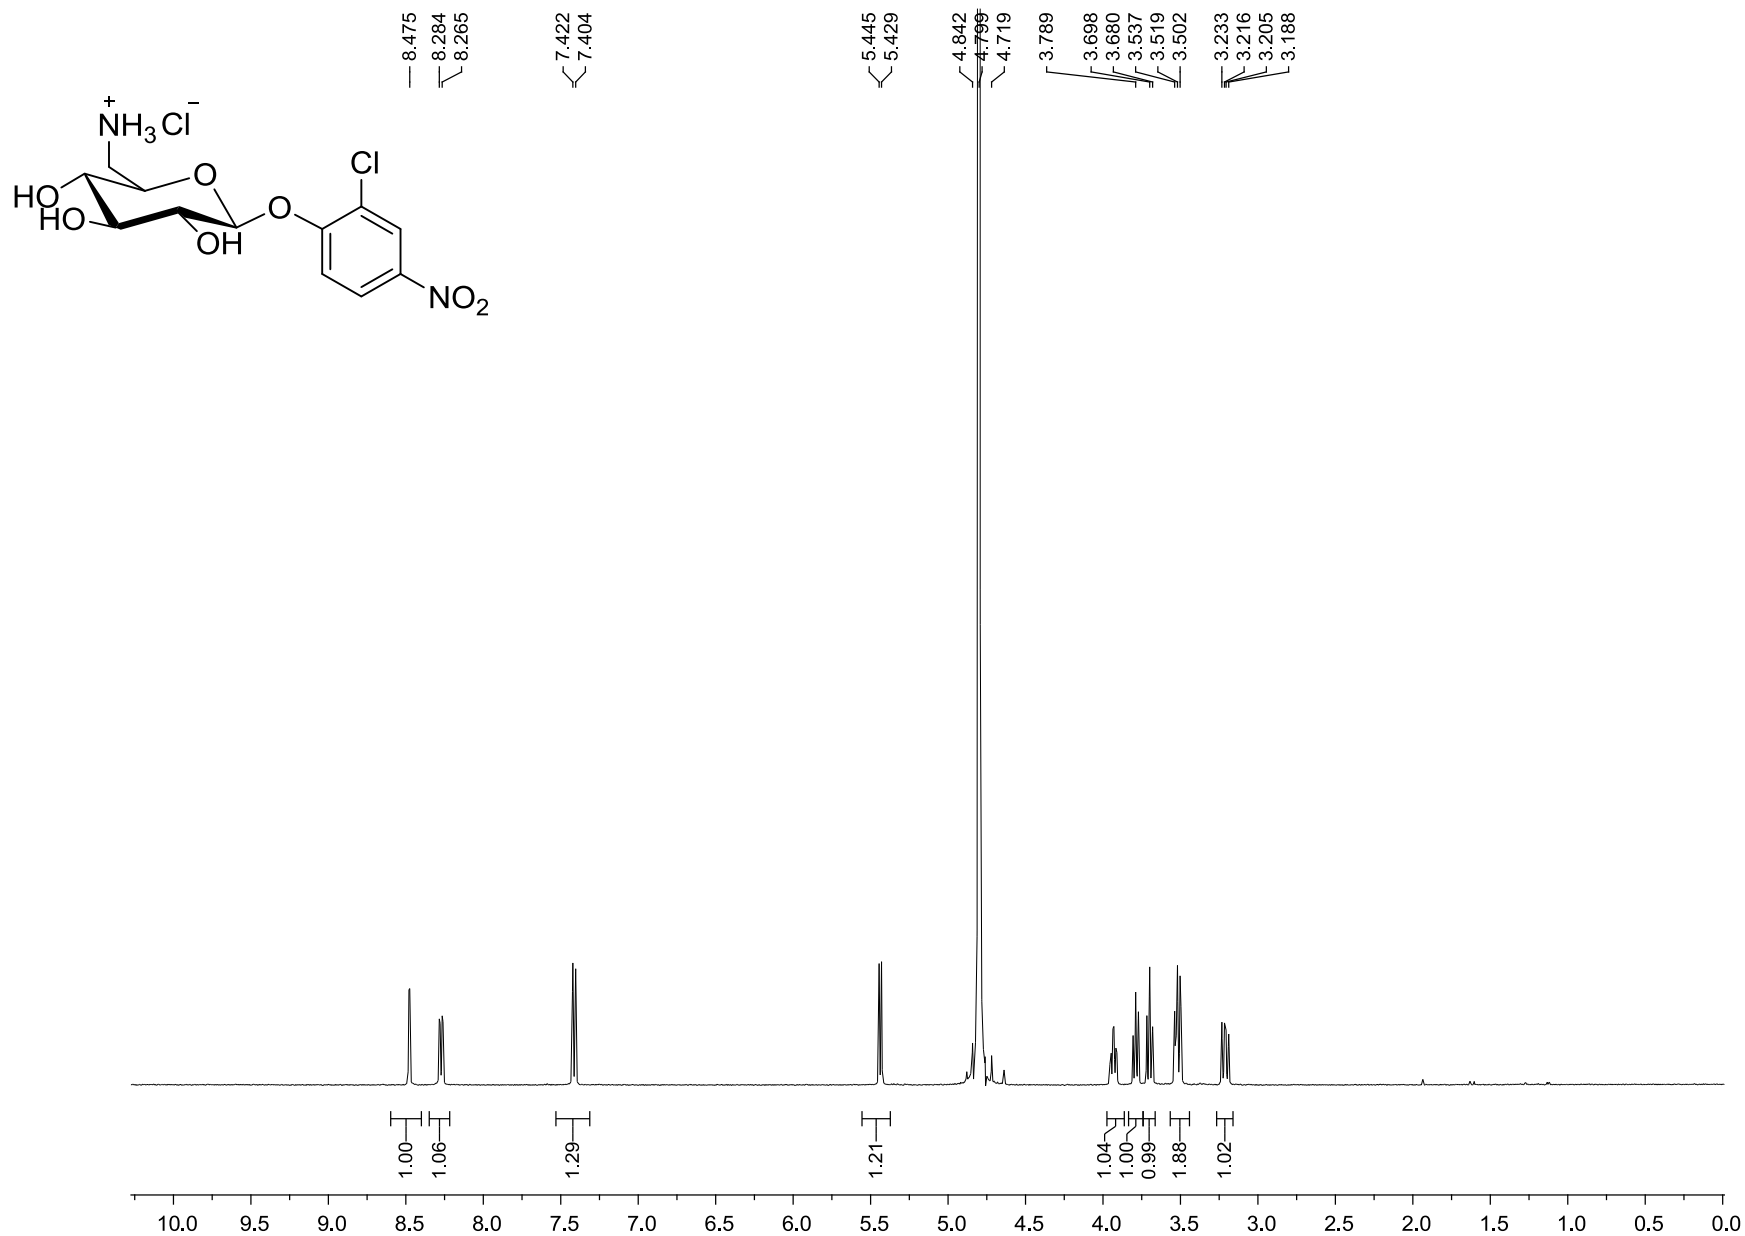

(2-chloro-4-nitrophenyl)-6-deoxy-6-amino- $\beta$ -D-glucopyranoside hydrochloride (**3a**):  $^{13}\text{C}$  NMR ( $\text{D}_2\text{O}$ , 125 MHz)

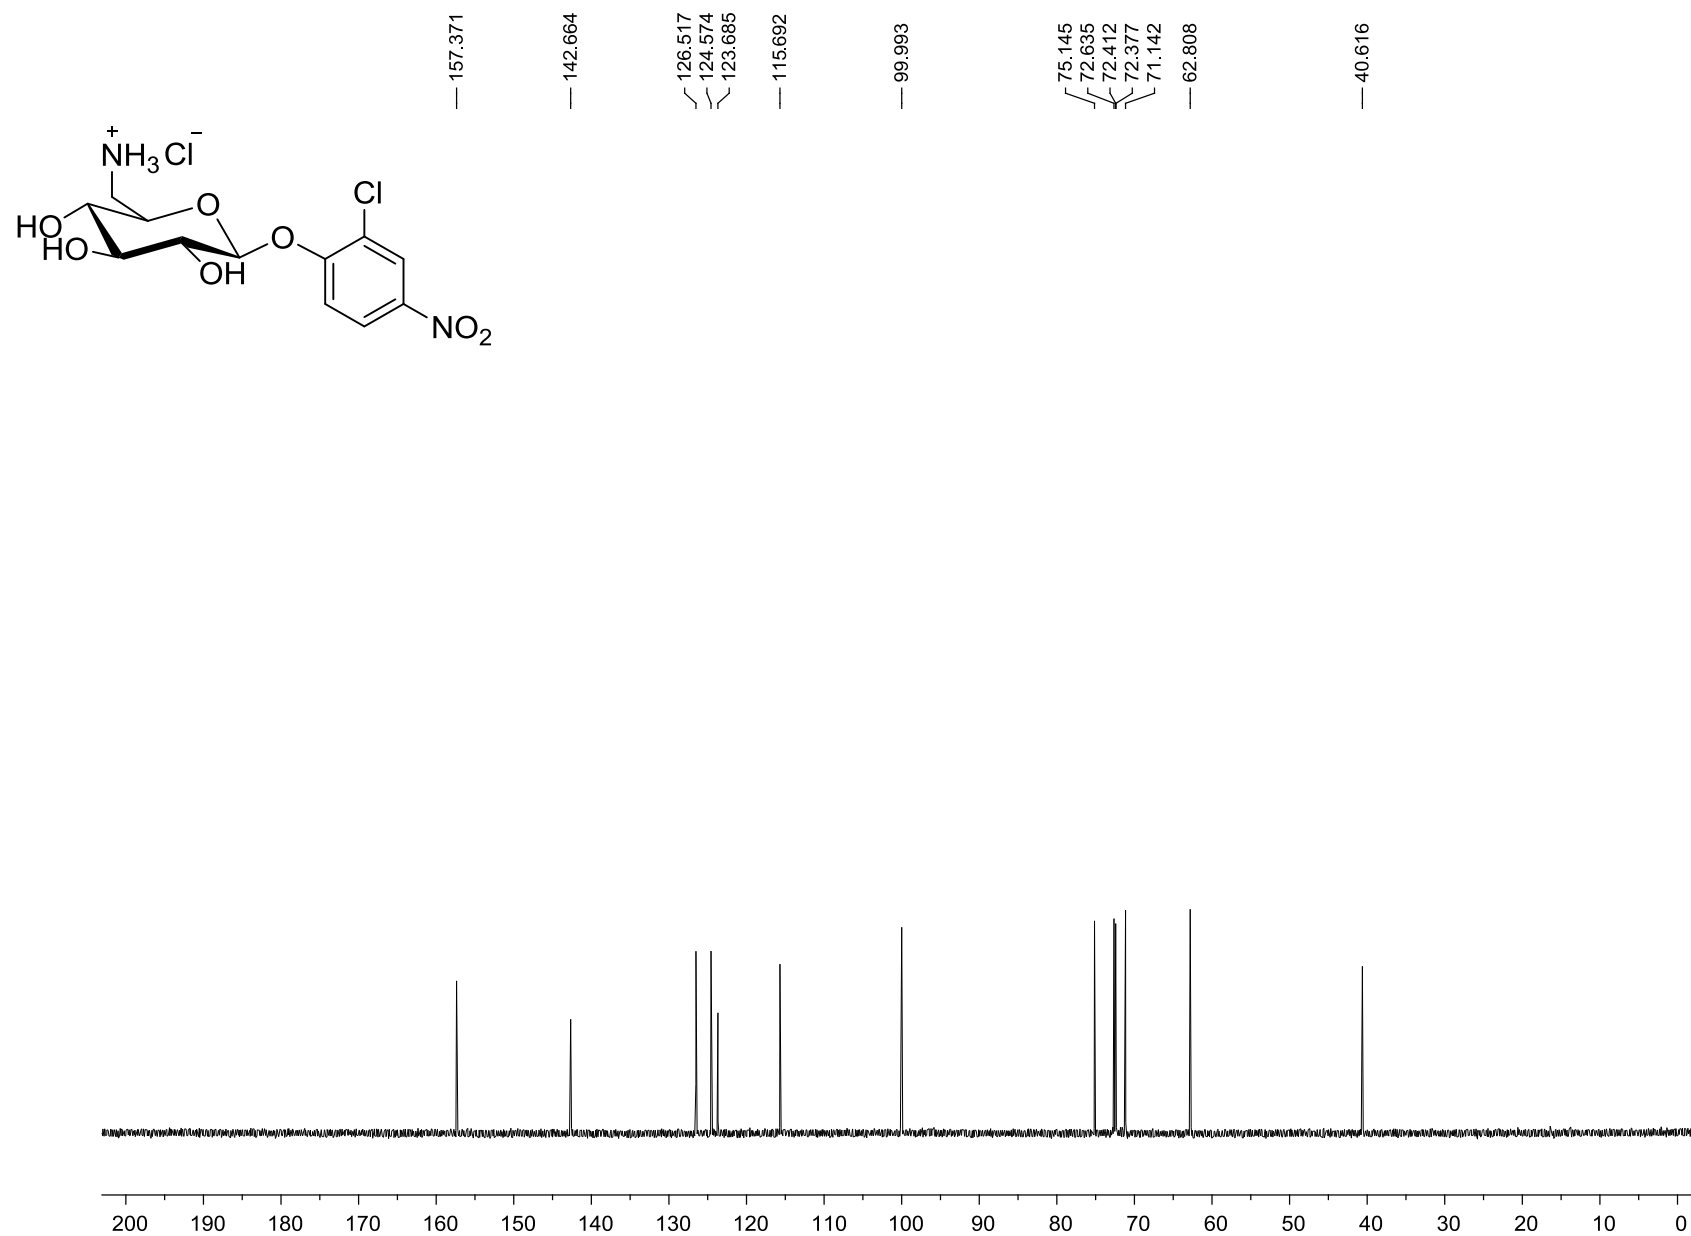



(2-chloro-4-nitrophenyl)-2-deoxy-2-azido-β-D-glucopyranoside (**4**): <sup>1</sup>H NMR (CD<sub>3</sub>OD, 500 MHz)

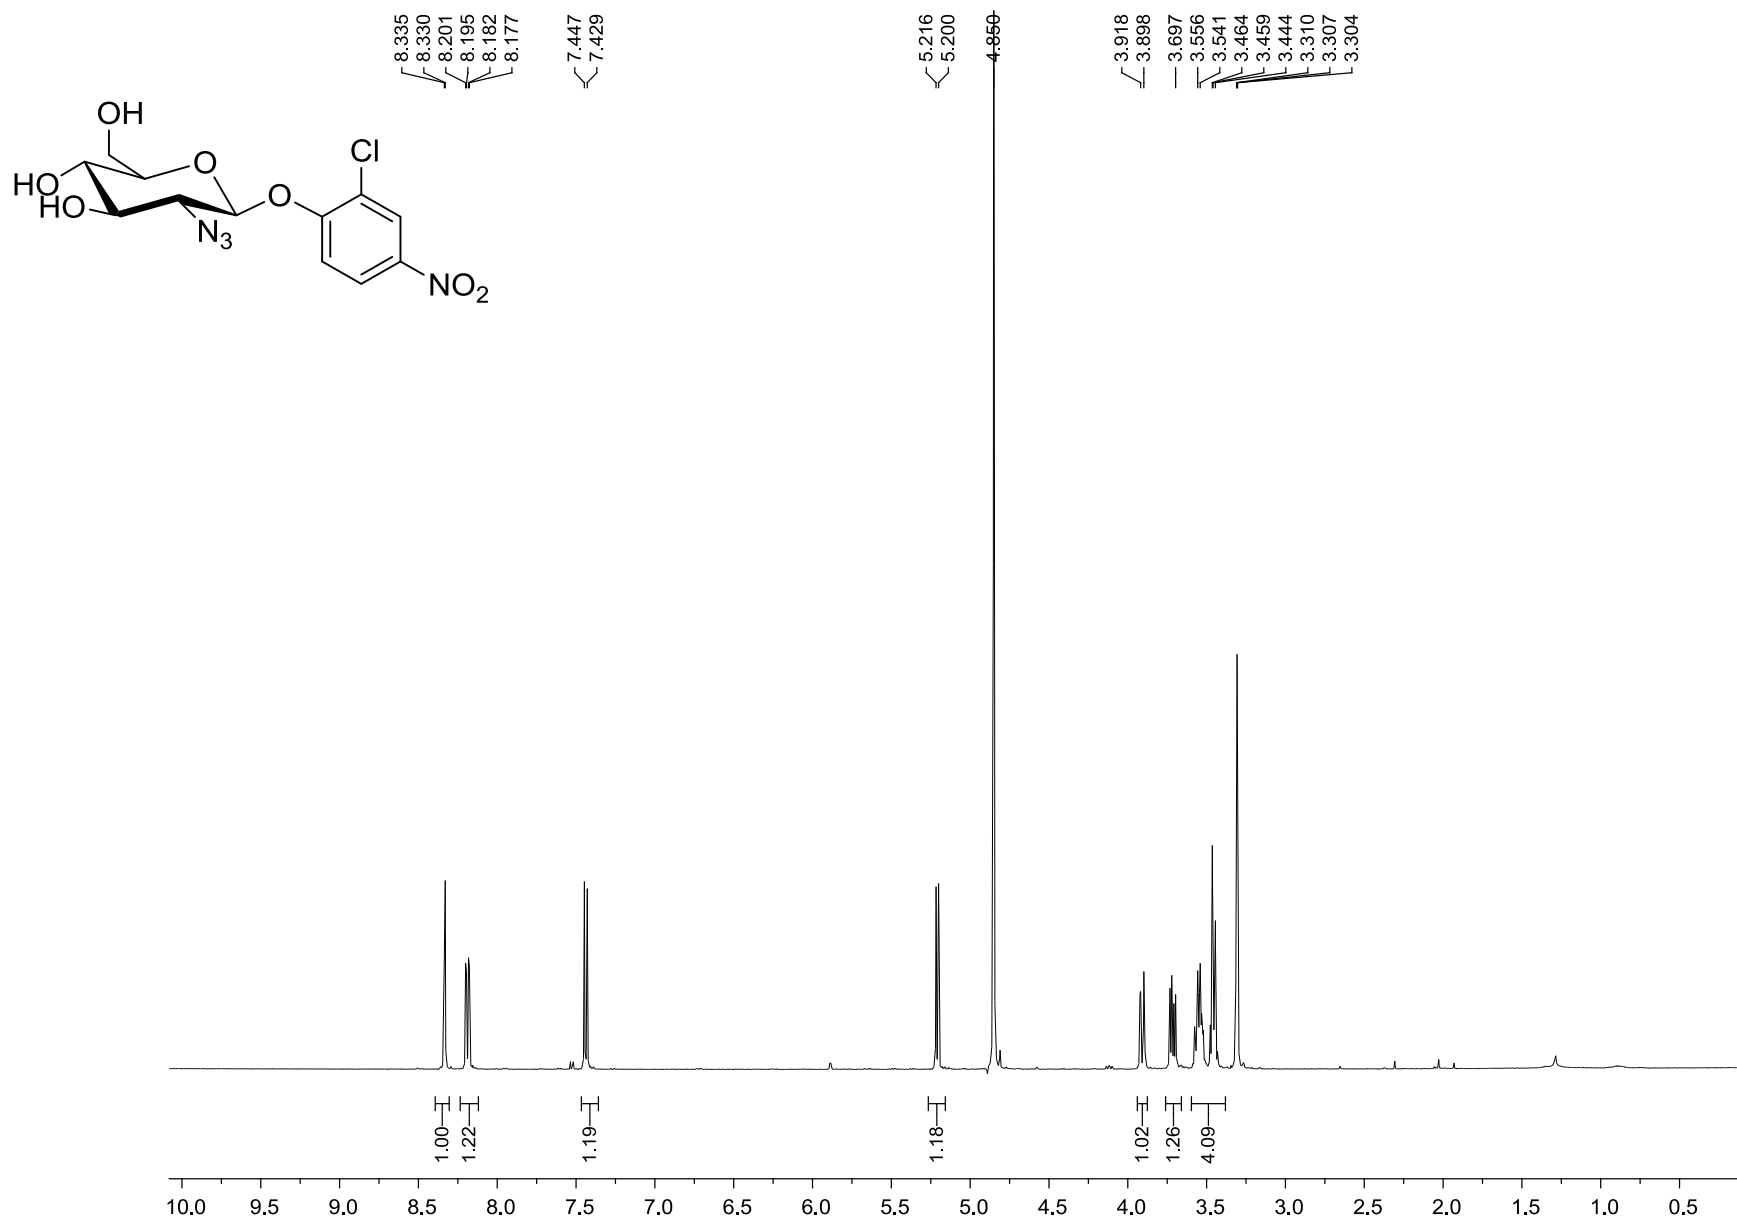

(2-chloro-4-nitrophenyl)-2-deoxy-2-azido- $\beta$ -D-glucopyranoside (**4**):  $^{13}\text{C}$  NMR ( $\text{CD}_3\text{OD}$ , 125 MHz)

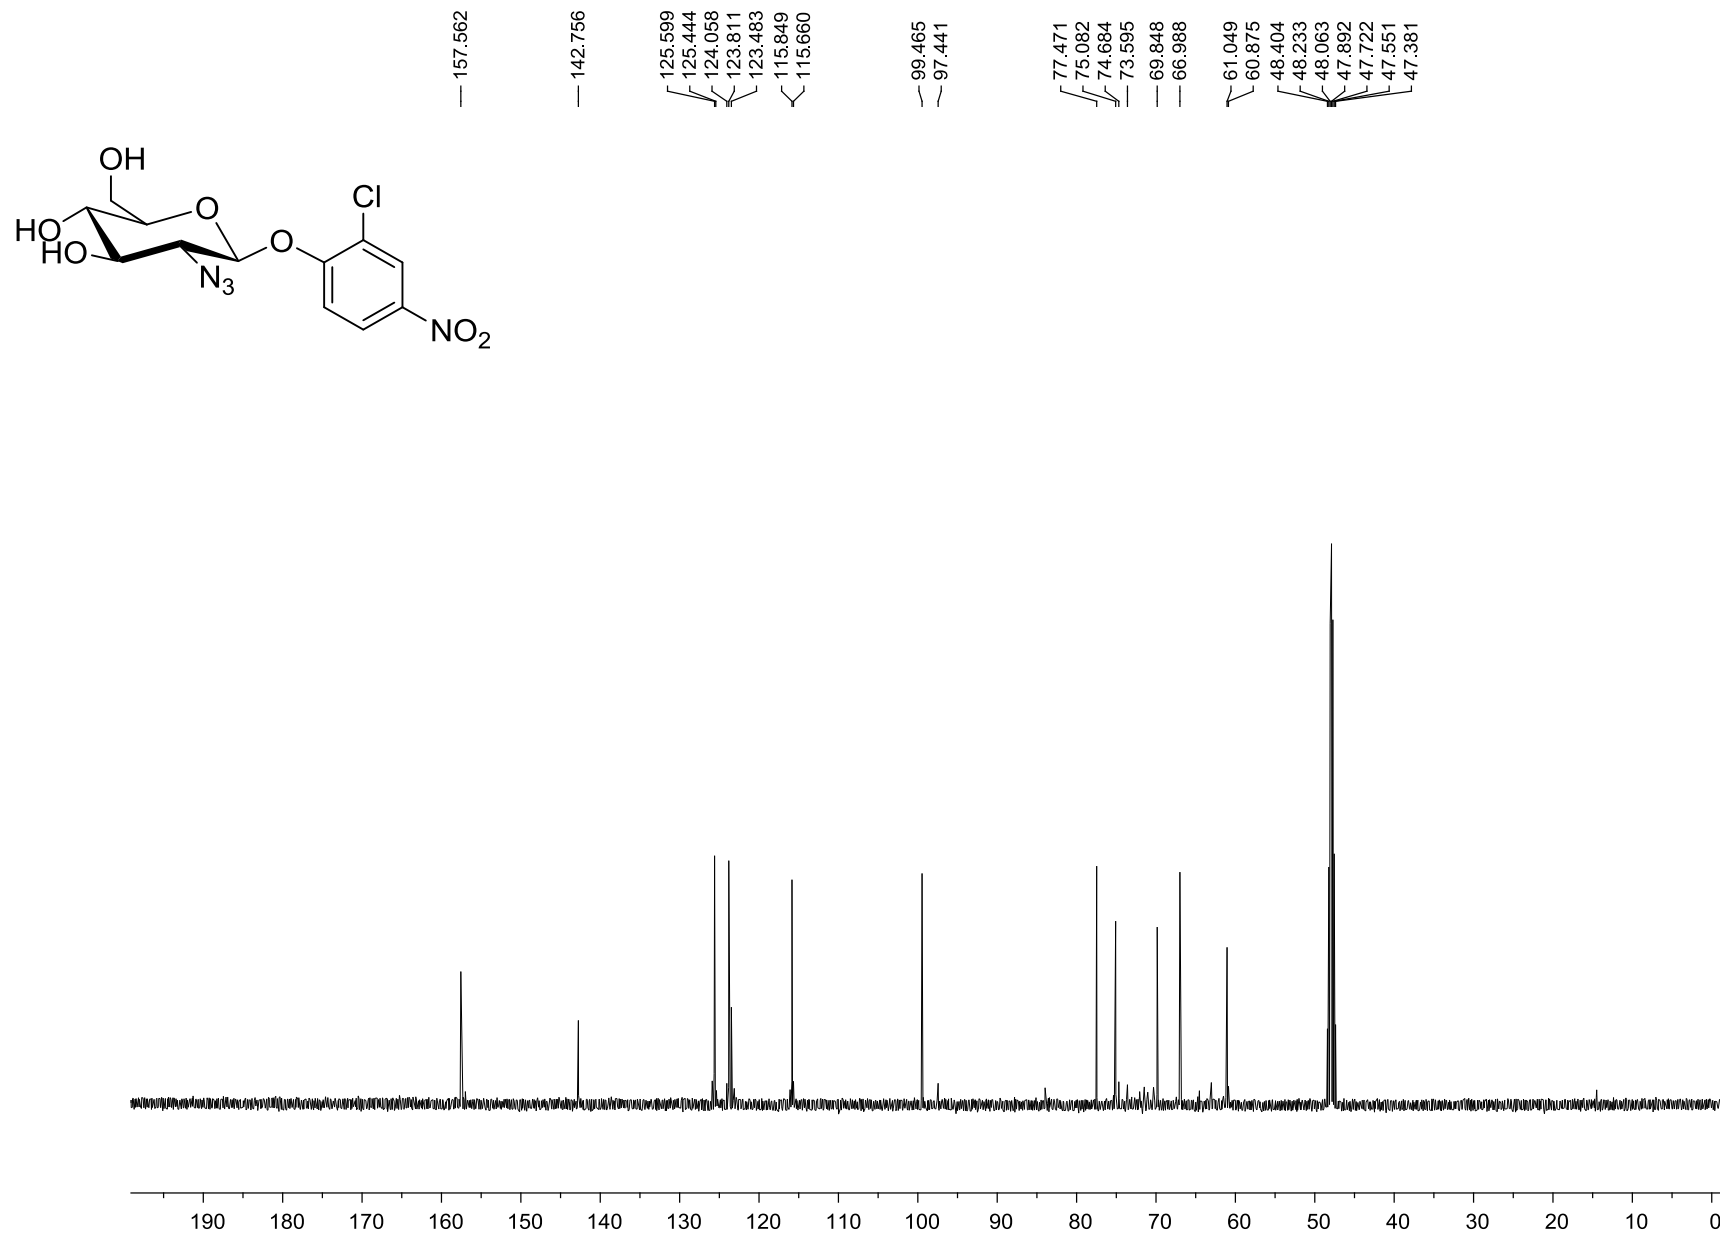

(2-chloro-4-nitrophenyl)-2-deoxy-2-amino-β-D-glucopyranoside (5): <sup>1</sup>H NMR (CD<sub>3</sub>OD, 400 MHz)

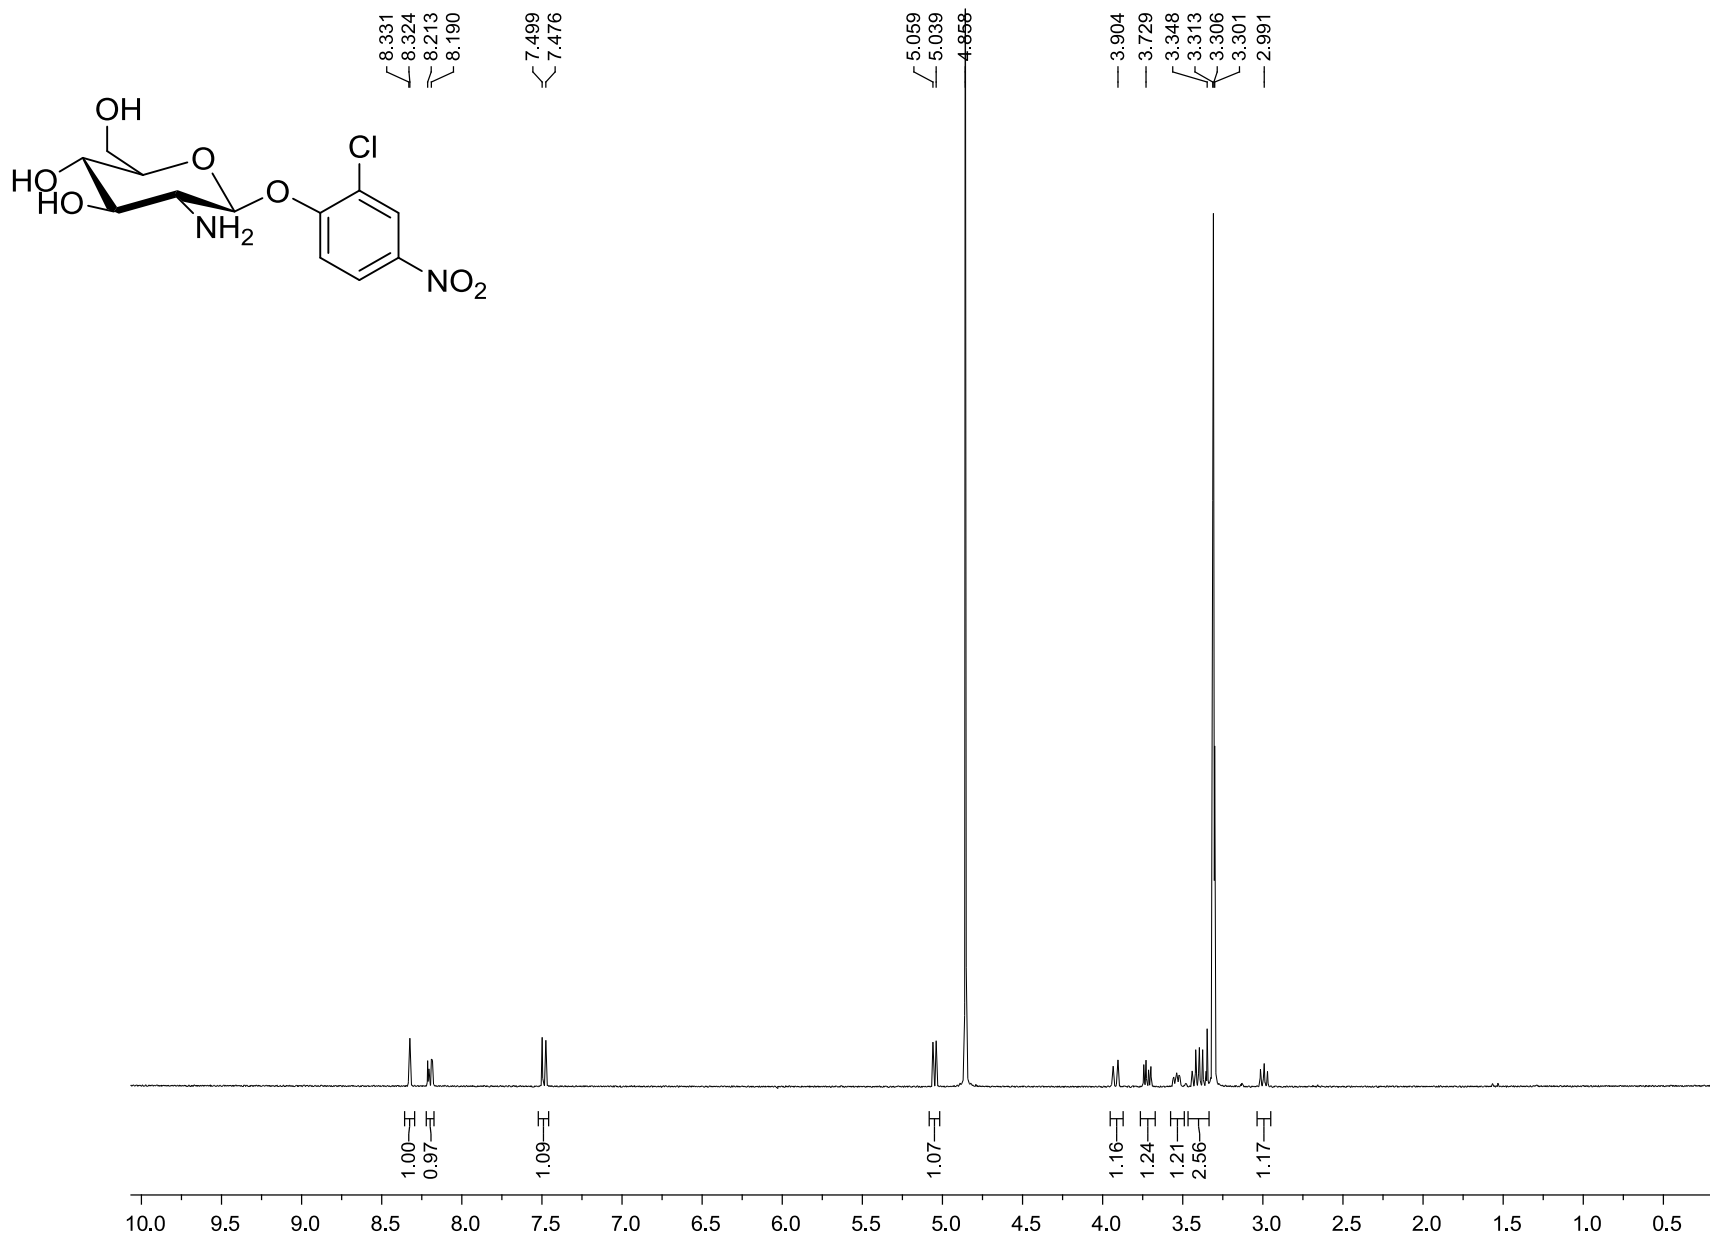

(2-chloro-4-nitrophenyl)-2-deoxy-2-amino- $\beta$ -D-glucopyranoside (**5**): gCOSY NMR ( $\text{CD}_3\text{OD}$ , 400 MHz)

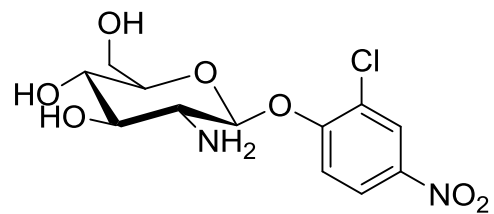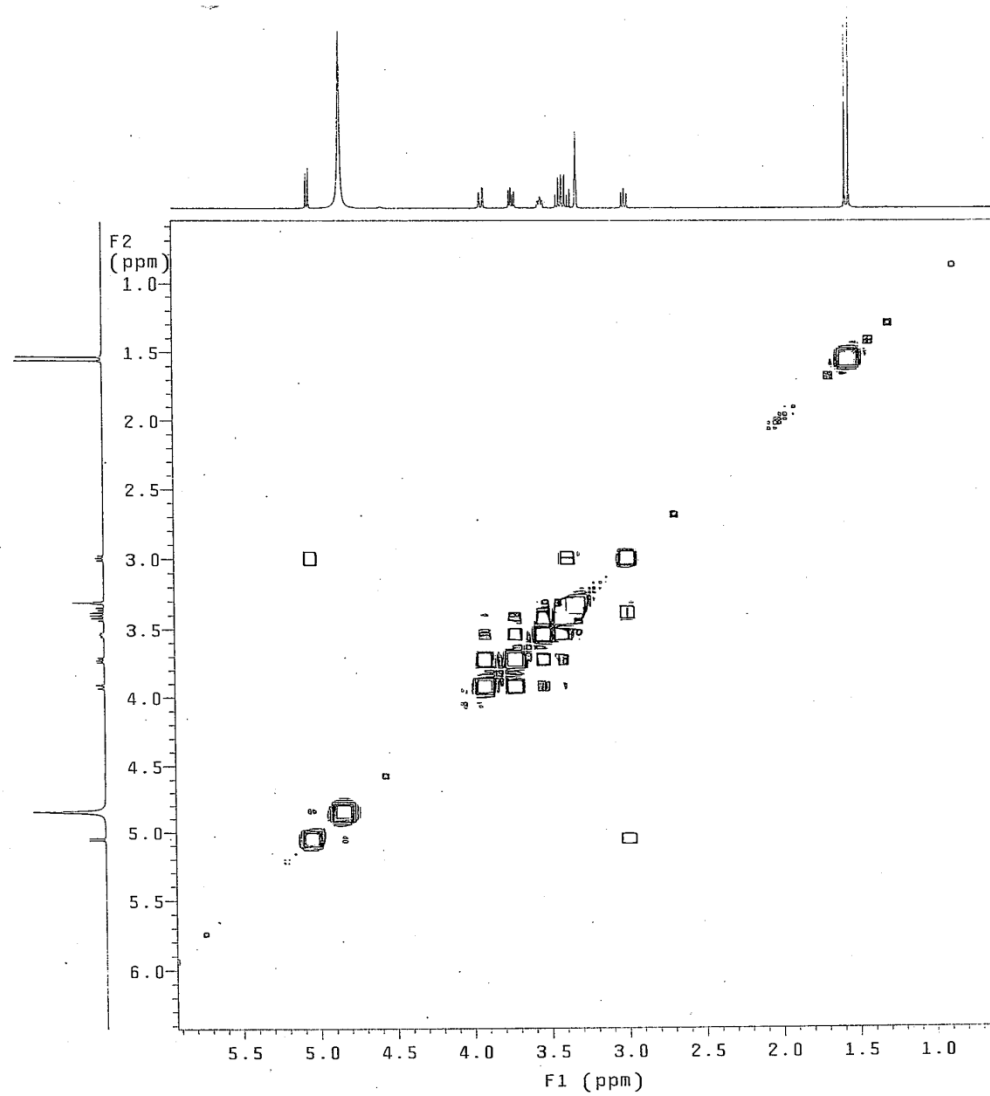

S40

(2-chloro-4-nitrophenyl)-2-deoxy-2-amino-β-D-glucopyranoside (**5**): <sup>13</sup>C NMR (CD<sub>3</sub>OD, 100 MHz)

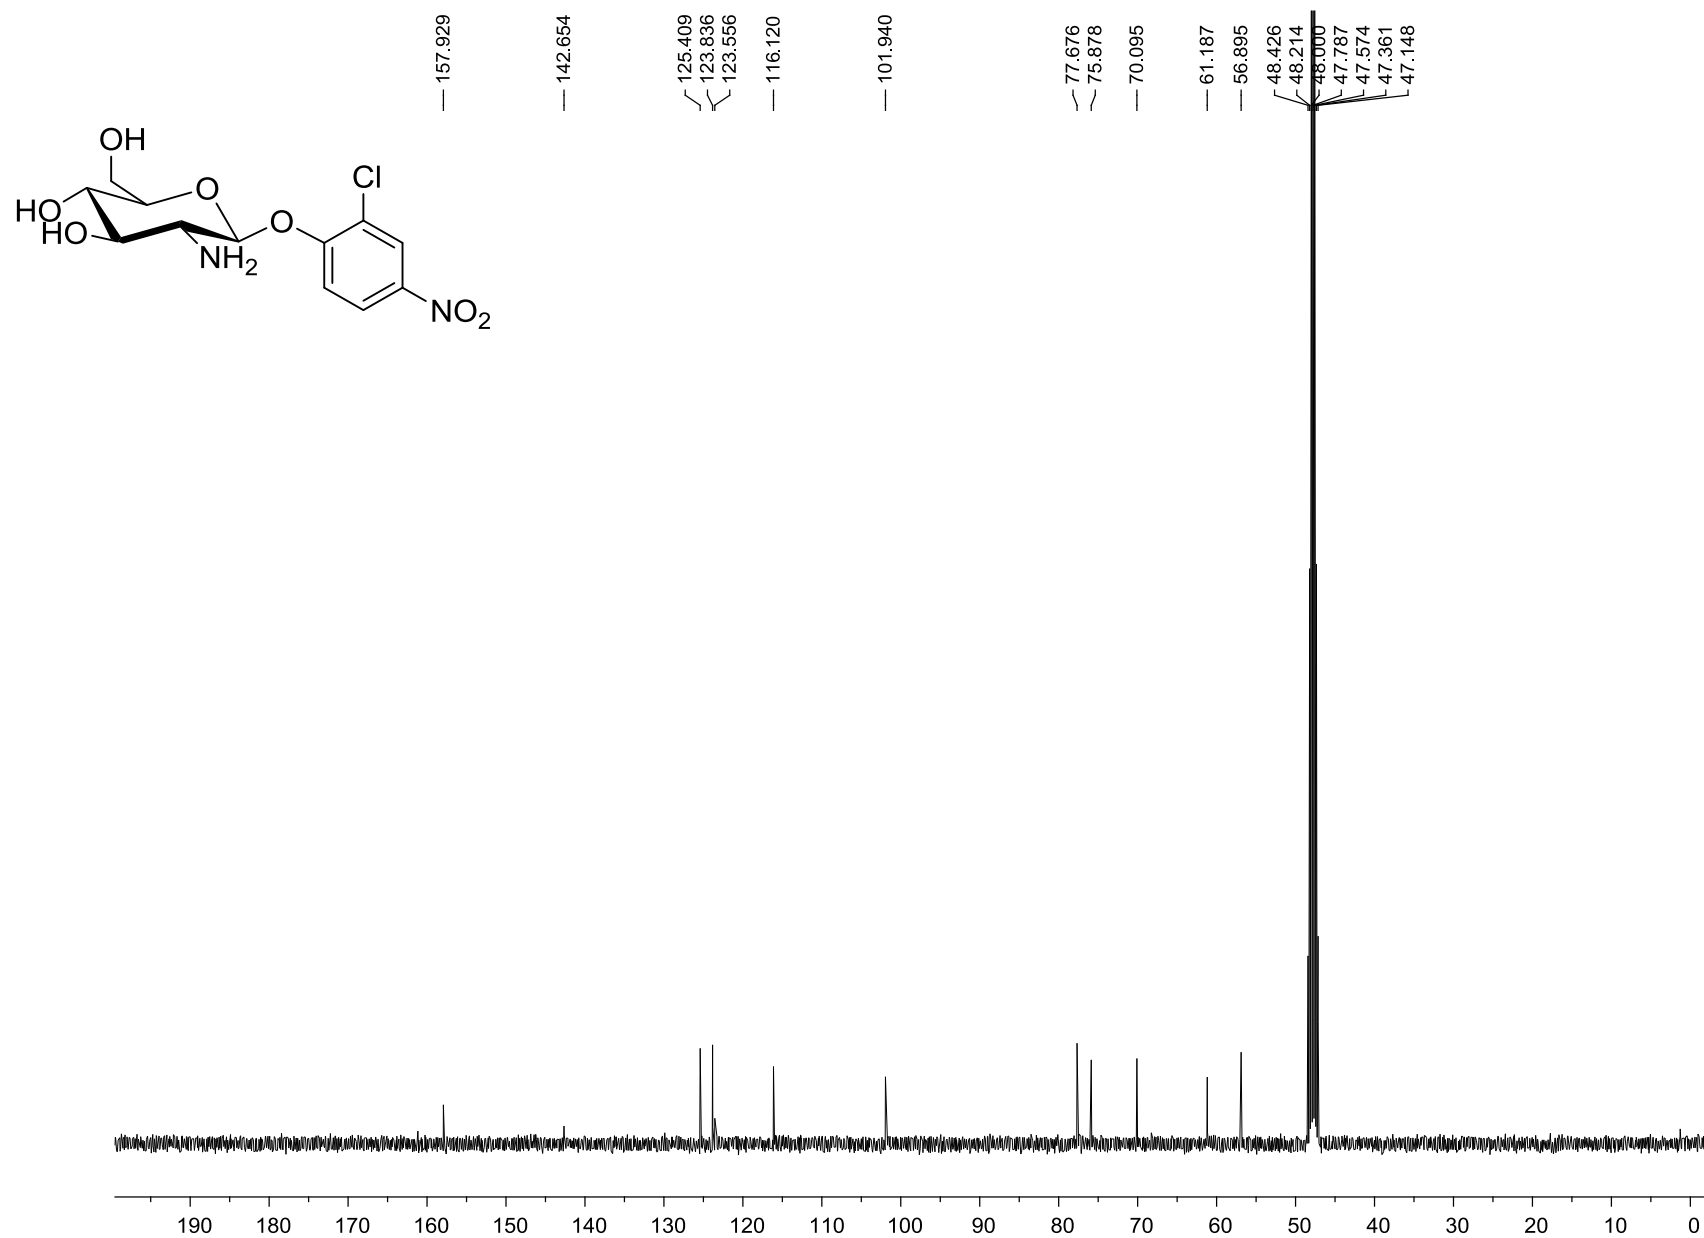

(2-chloro-4-nitrophenyl)-2-deoxy-2-amino-β-D-glucopyranoside hydrochloride (**5a**): <sup>1</sup>H NMR (CD<sub>3</sub>OD, 500 MHz)

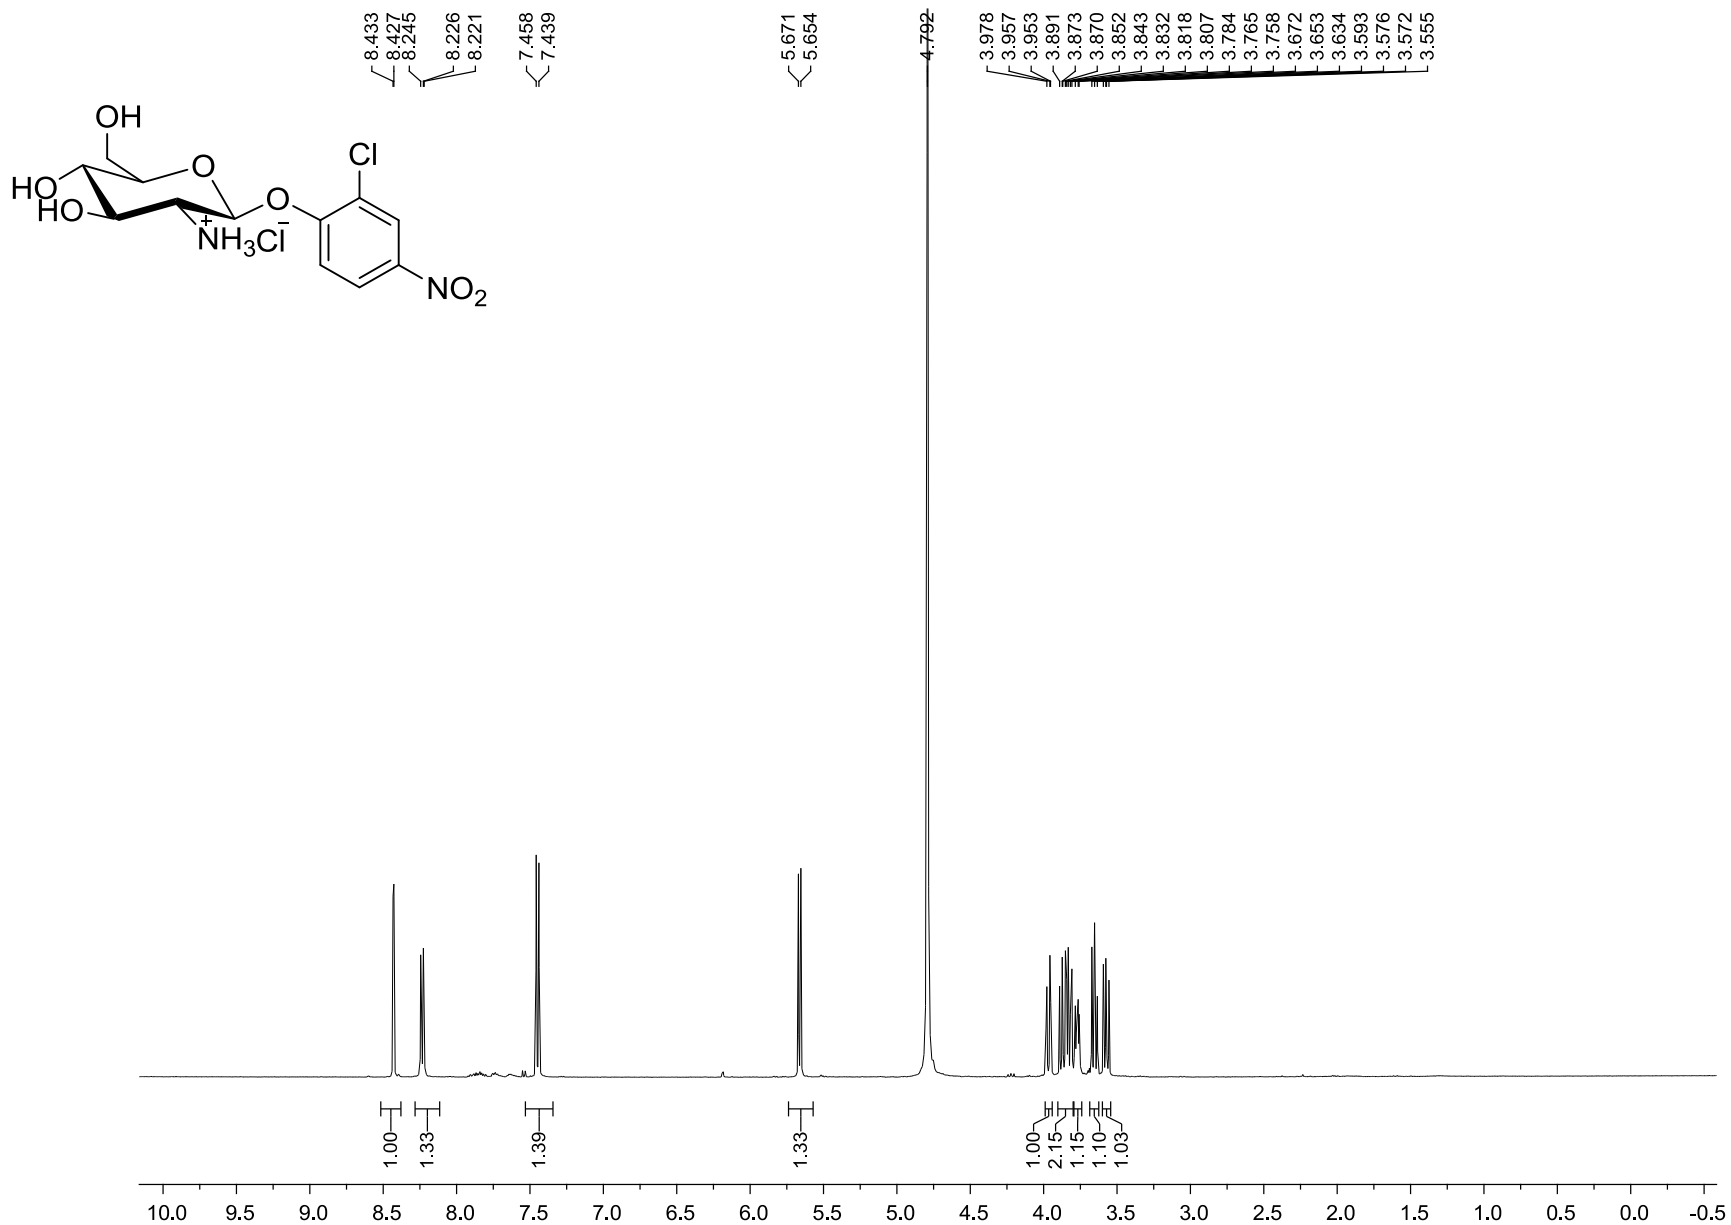

(2-chloro-4-nitrophenyl)-2-deoxy-2-amino- $\beta$ -D-glucopyranoside hydrochloride (**5a**):  $^{13}\text{C}$  NMR ( $\text{CD}_3\text{OD}$ , 125 MHz)

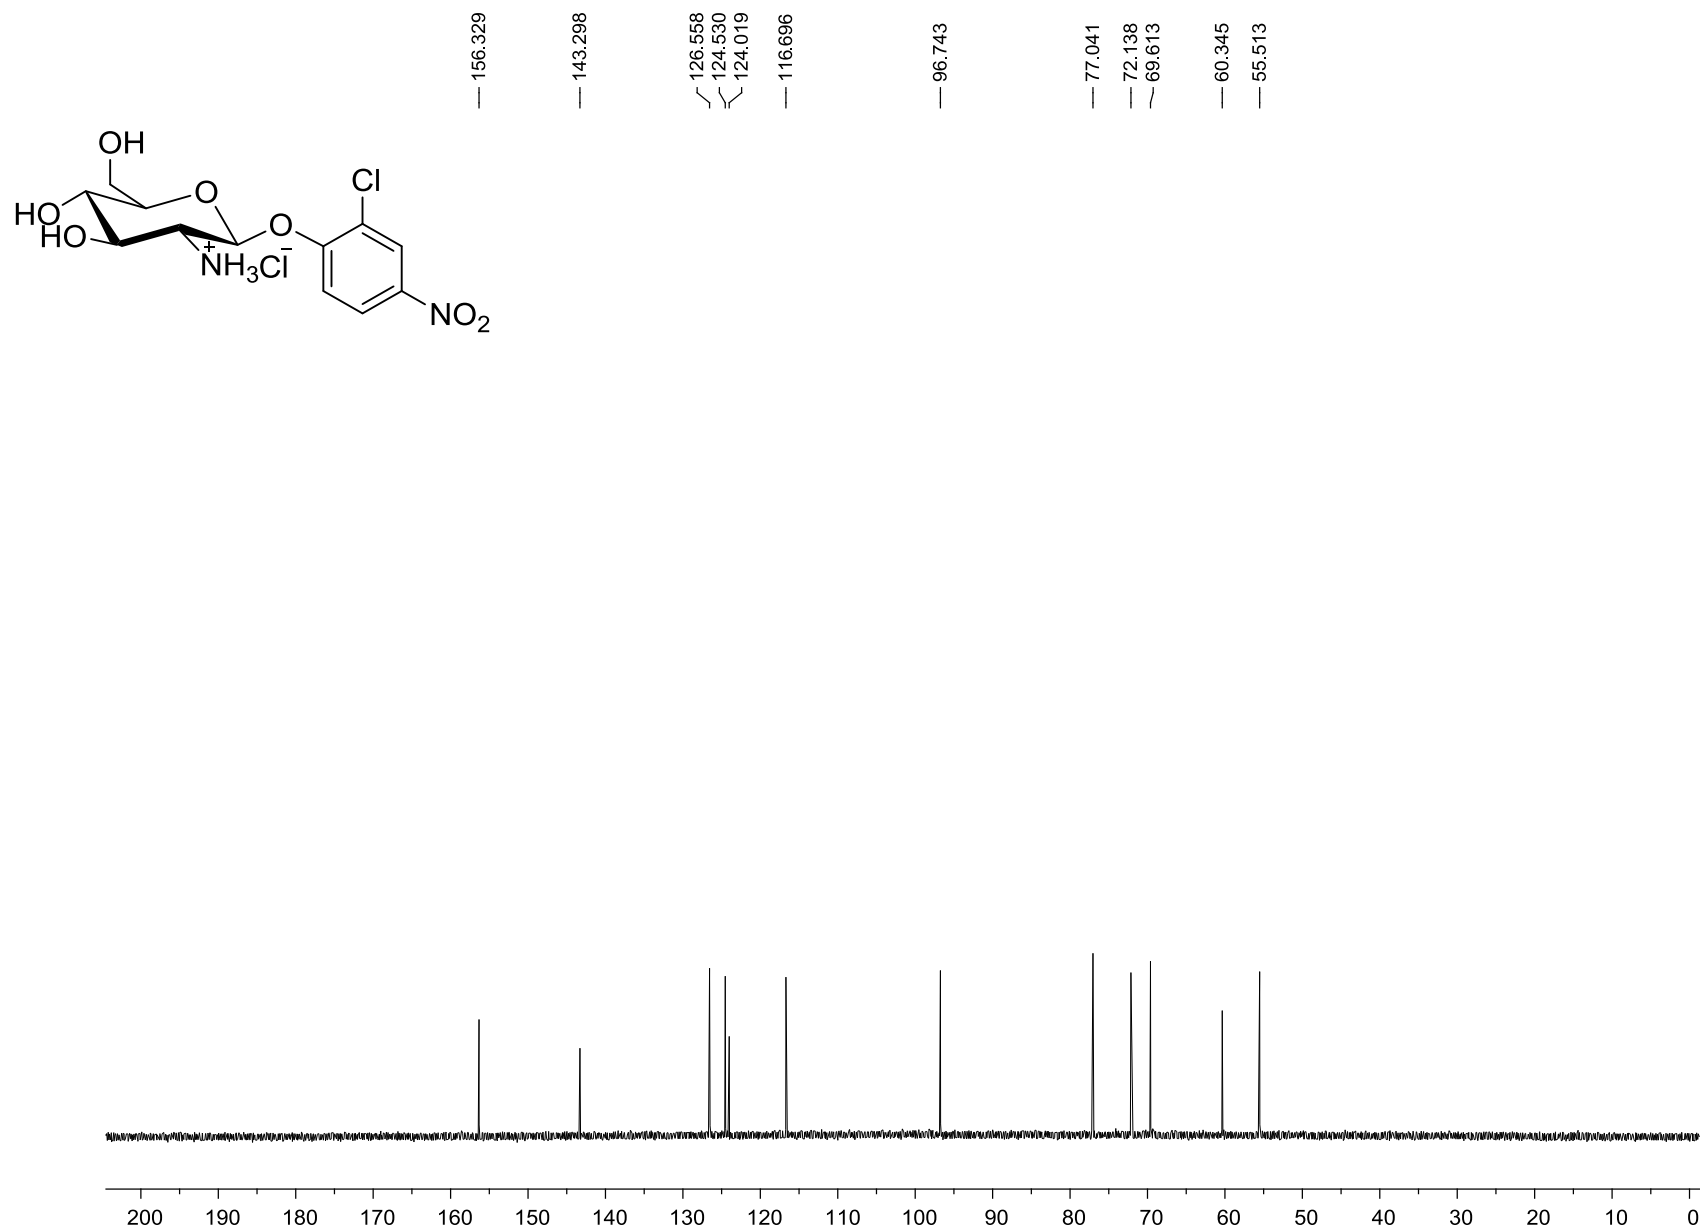

(2-chloro-4-nitrophenyl)-3-deoxy-3-azido-β-D-glucopyranoside (**6**): <sup>1</sup>H NMR (CD<sub>3</sub>OD, 400 MHz)

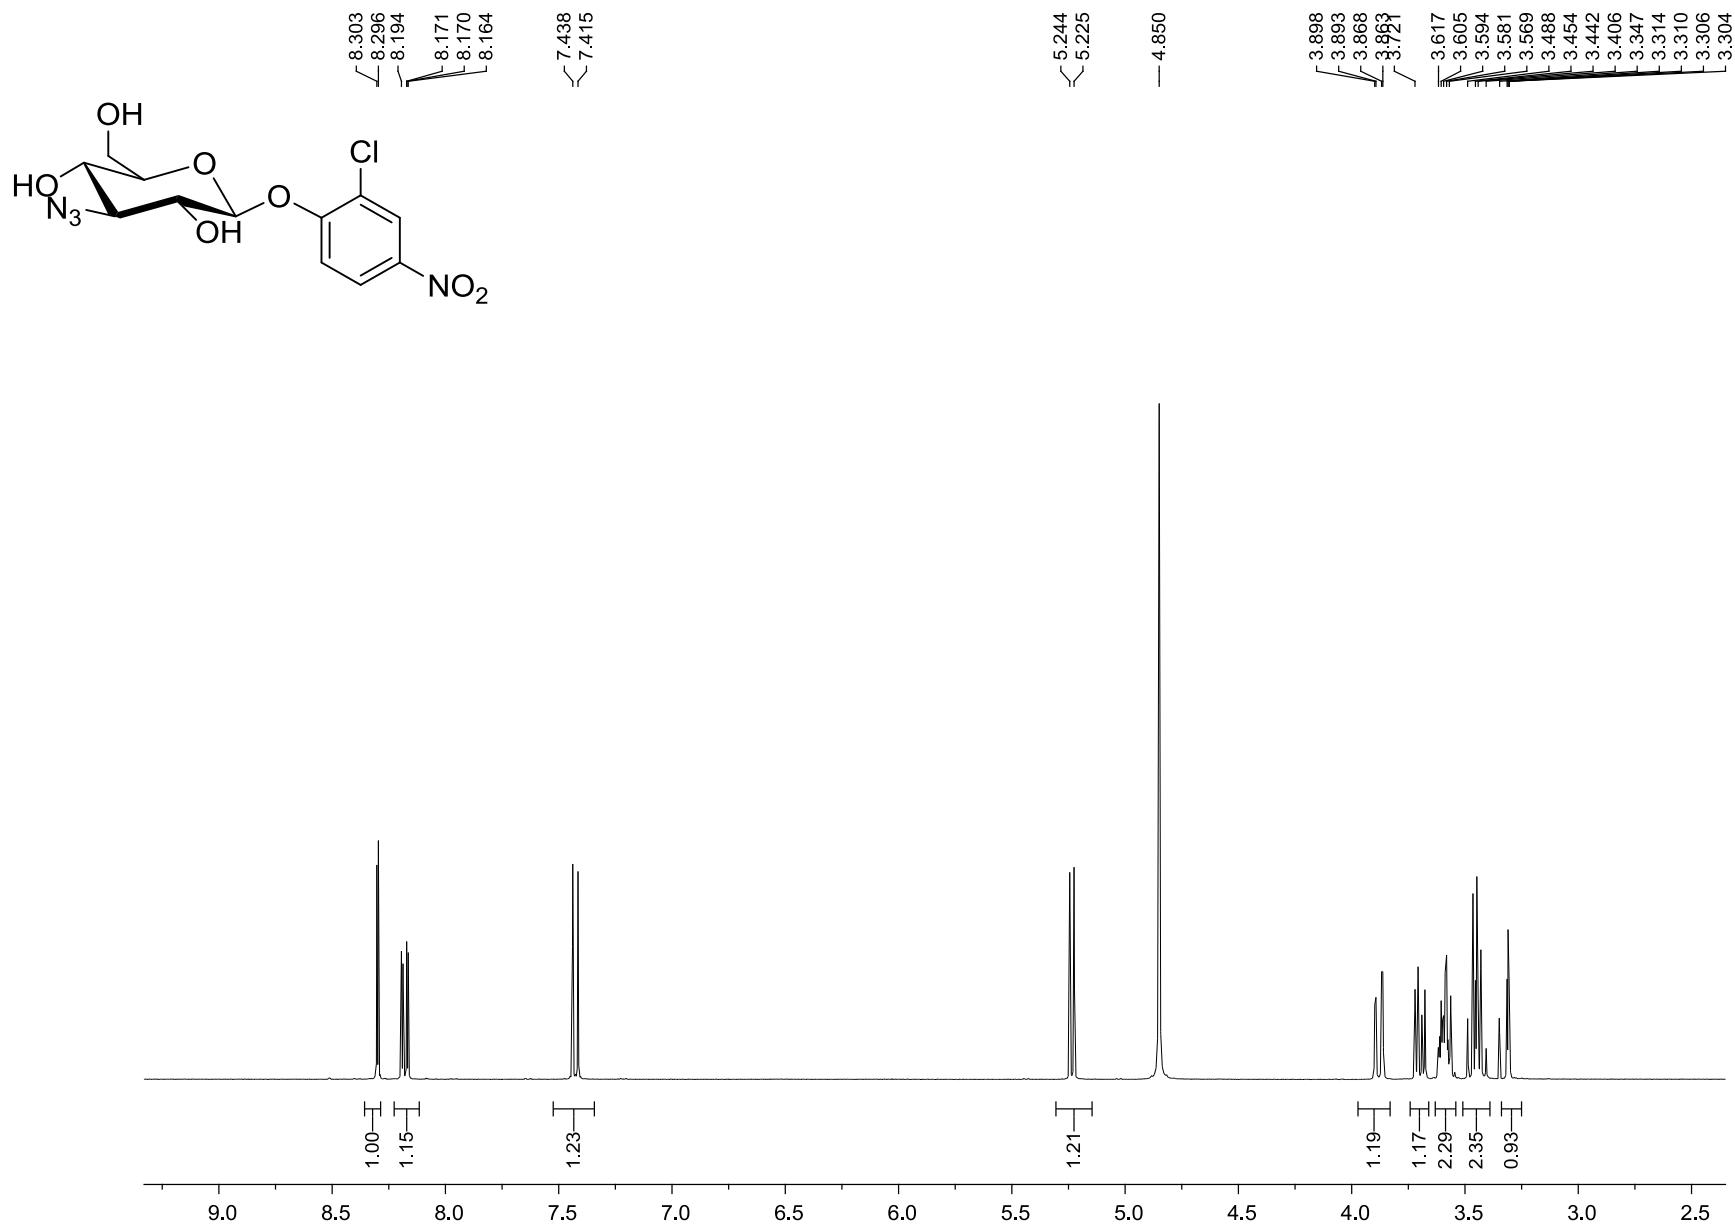



(2-chloro-4-nitrophenyl)-3-deoxy-3-azido- $\beta$ -D-glucopyranoside (**6**):  $^{13}\text{C}$  NMR ( $\text{CD}_3\text{OD}$ , 100 MHz)

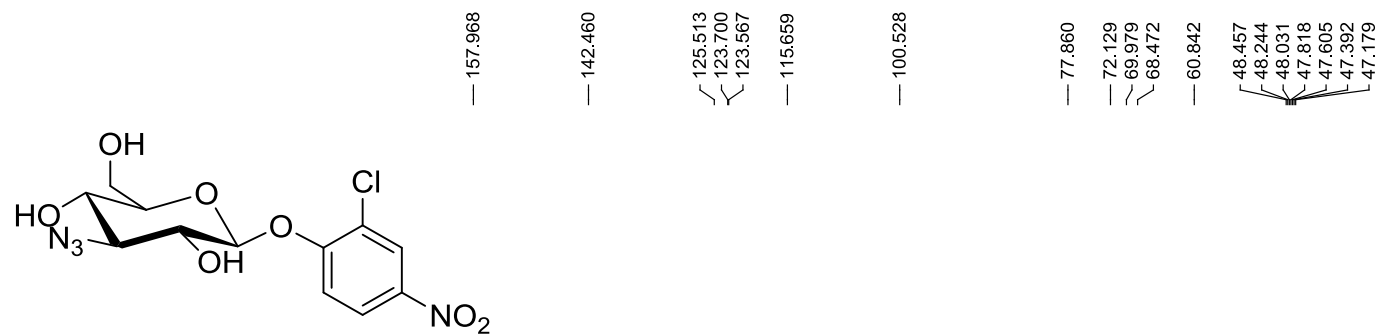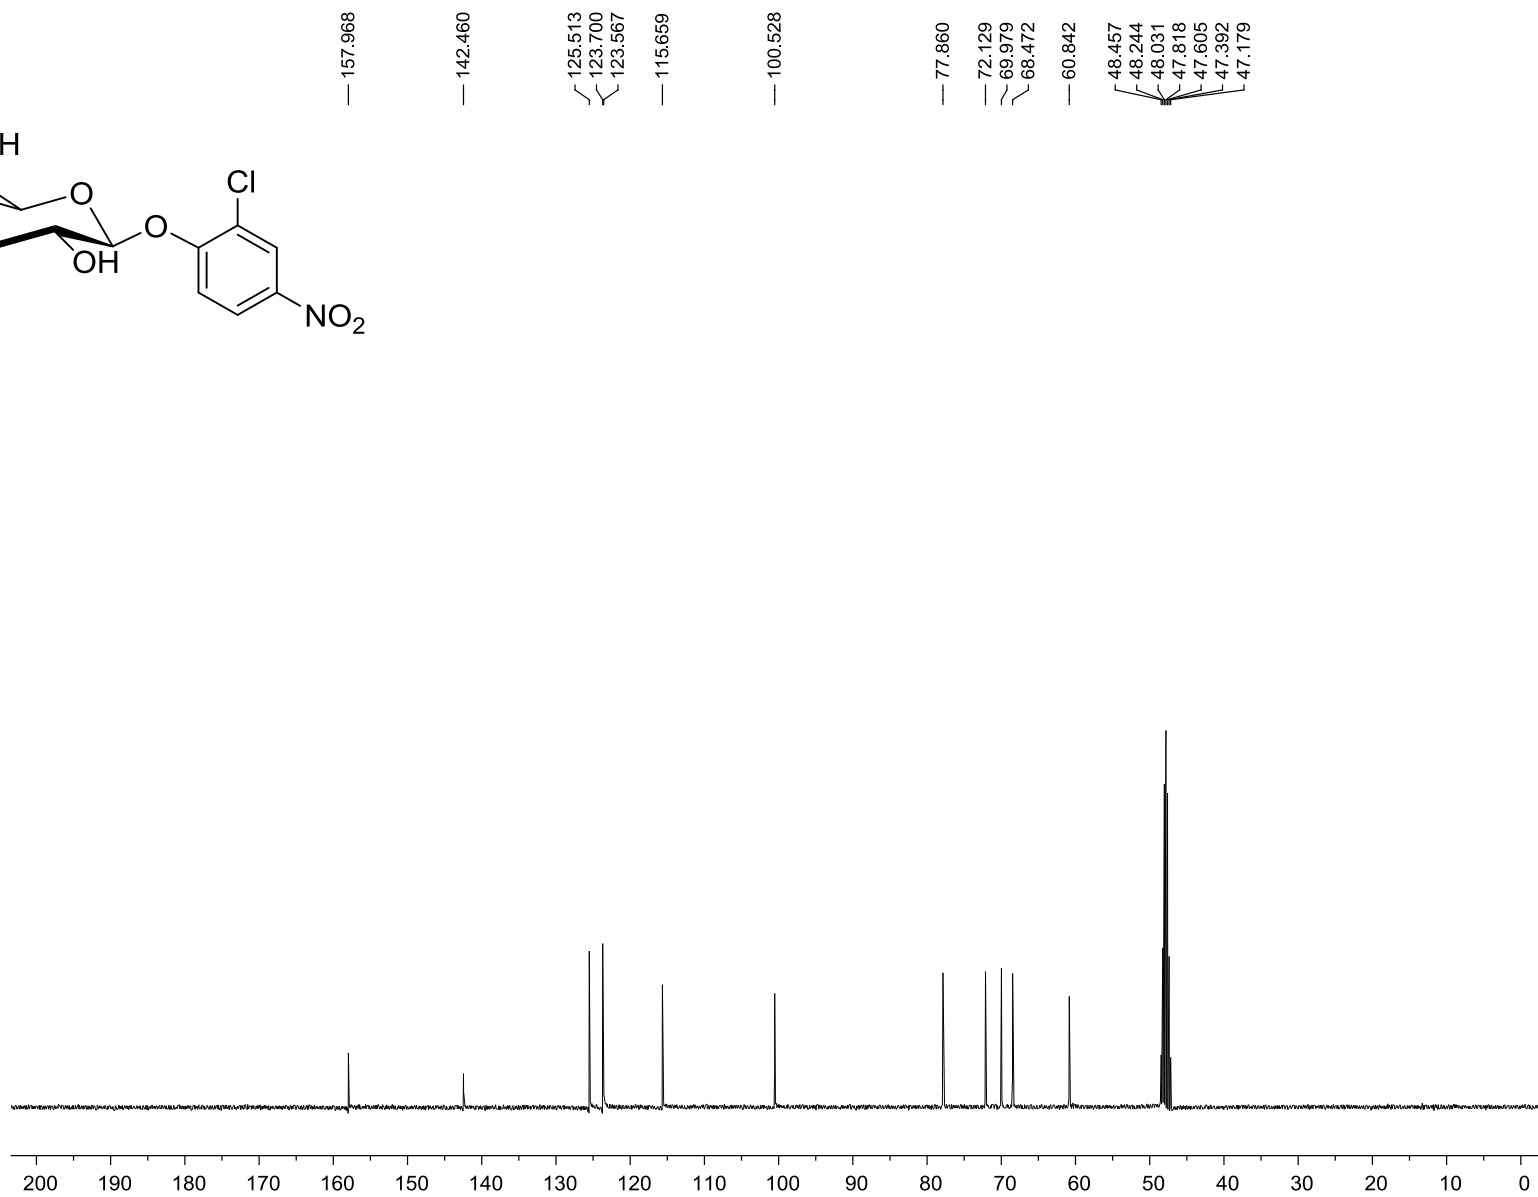

(2-chloro-4-nitrophenyl)-3-deoxy-3-amino-β-D-glucopyranoside (7): <sup>1</sup>H NMR (CD<sub>3</sub>OD, 400 MHz)

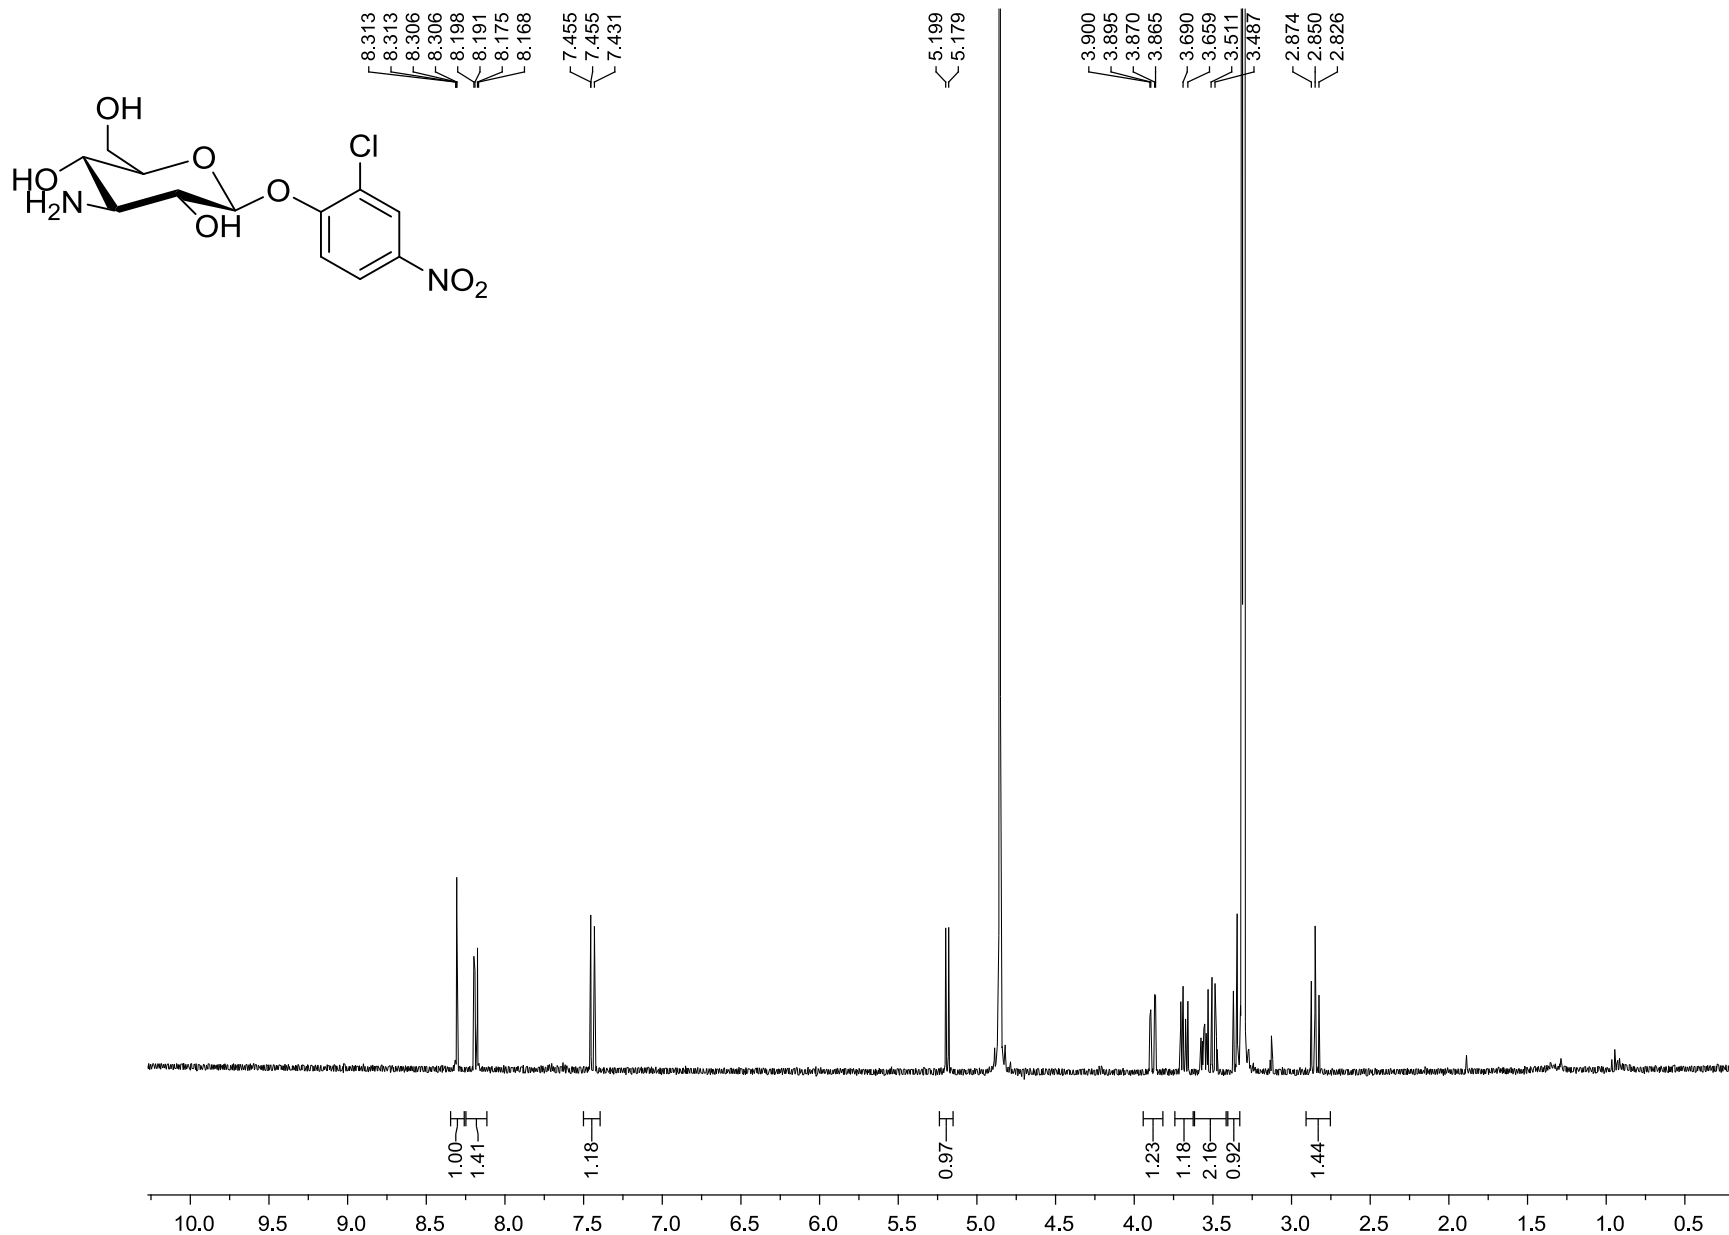

(2-chloro-4-nitrophenyl)-3-deoxy-3-amino- $\beta$ -D-glucopyranoside (**7**): gCOSY NMR ( $\text{CD}_3\text{OD}$ , 500 MHz)

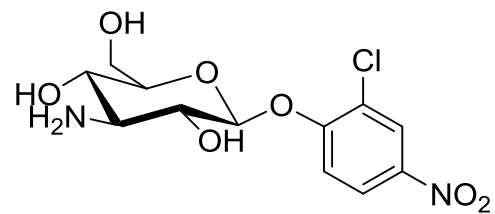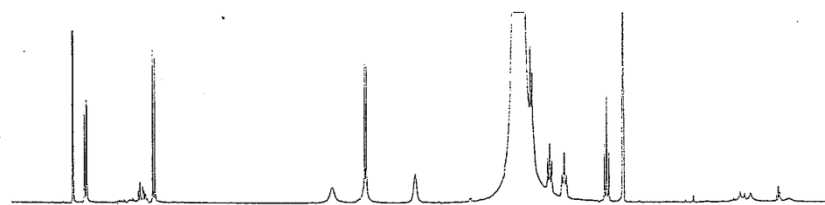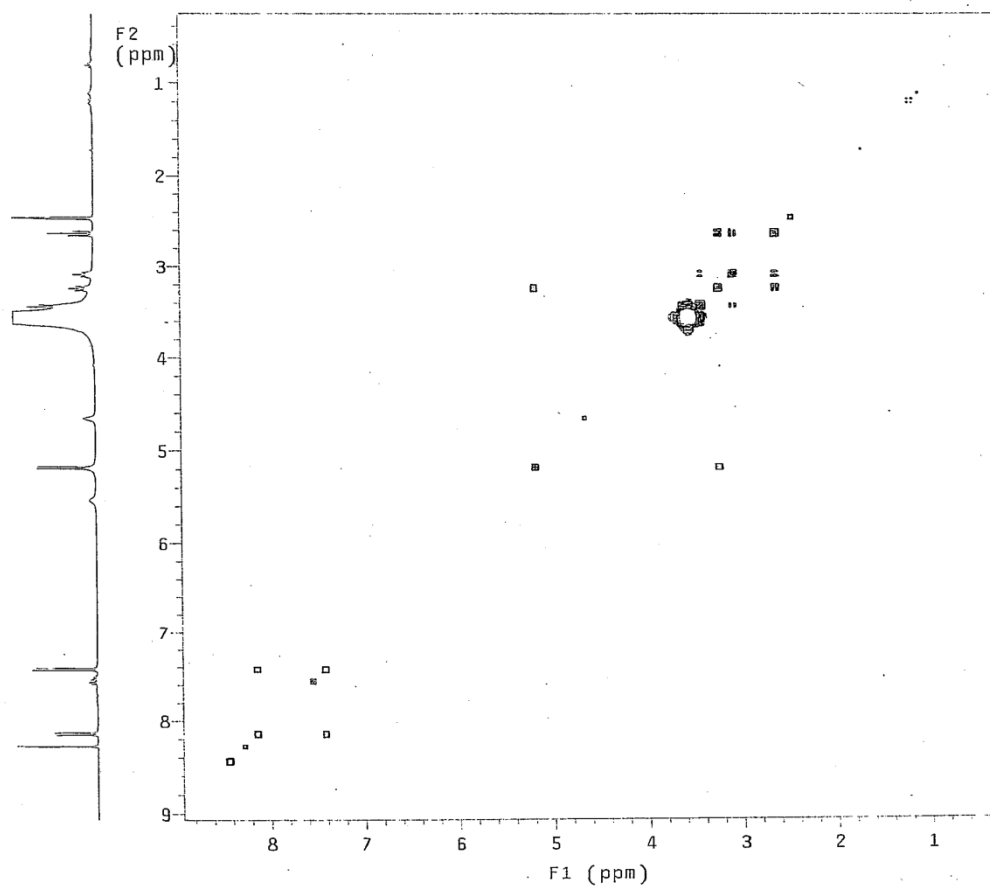

S47

(2-chloro-4-nitrophenyl)-3-deoxy-3-amino-β-D-glucopyranoside (7): <sup>13</sup>C NMR (DMSO-*d*<sub>6</sub>, 100 MHz)

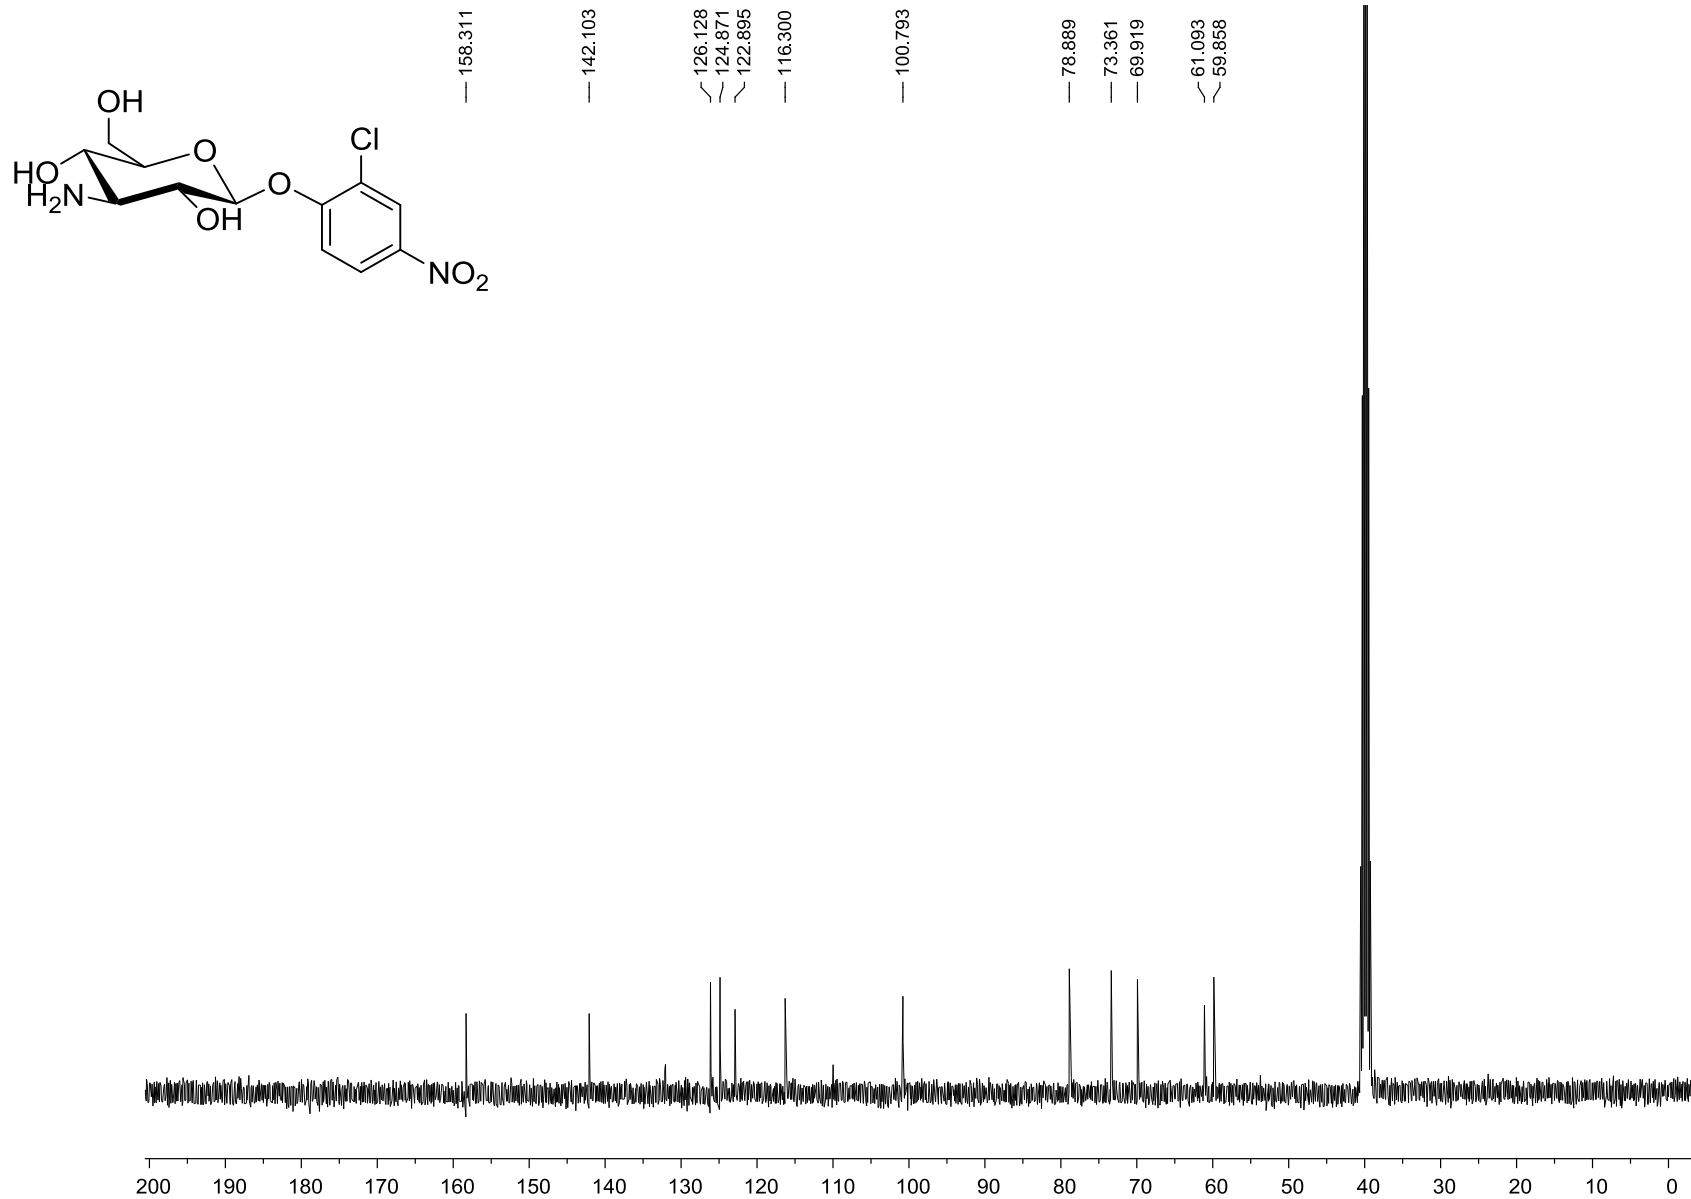

(2-chloro-4-nitrophenyl)-3-deoxy-3-amino-β-D-glucopyranoside hydrochloride (**7a**): <sup>1</sup>H NMR (D<sub>2</sub>O, 500 MHz)

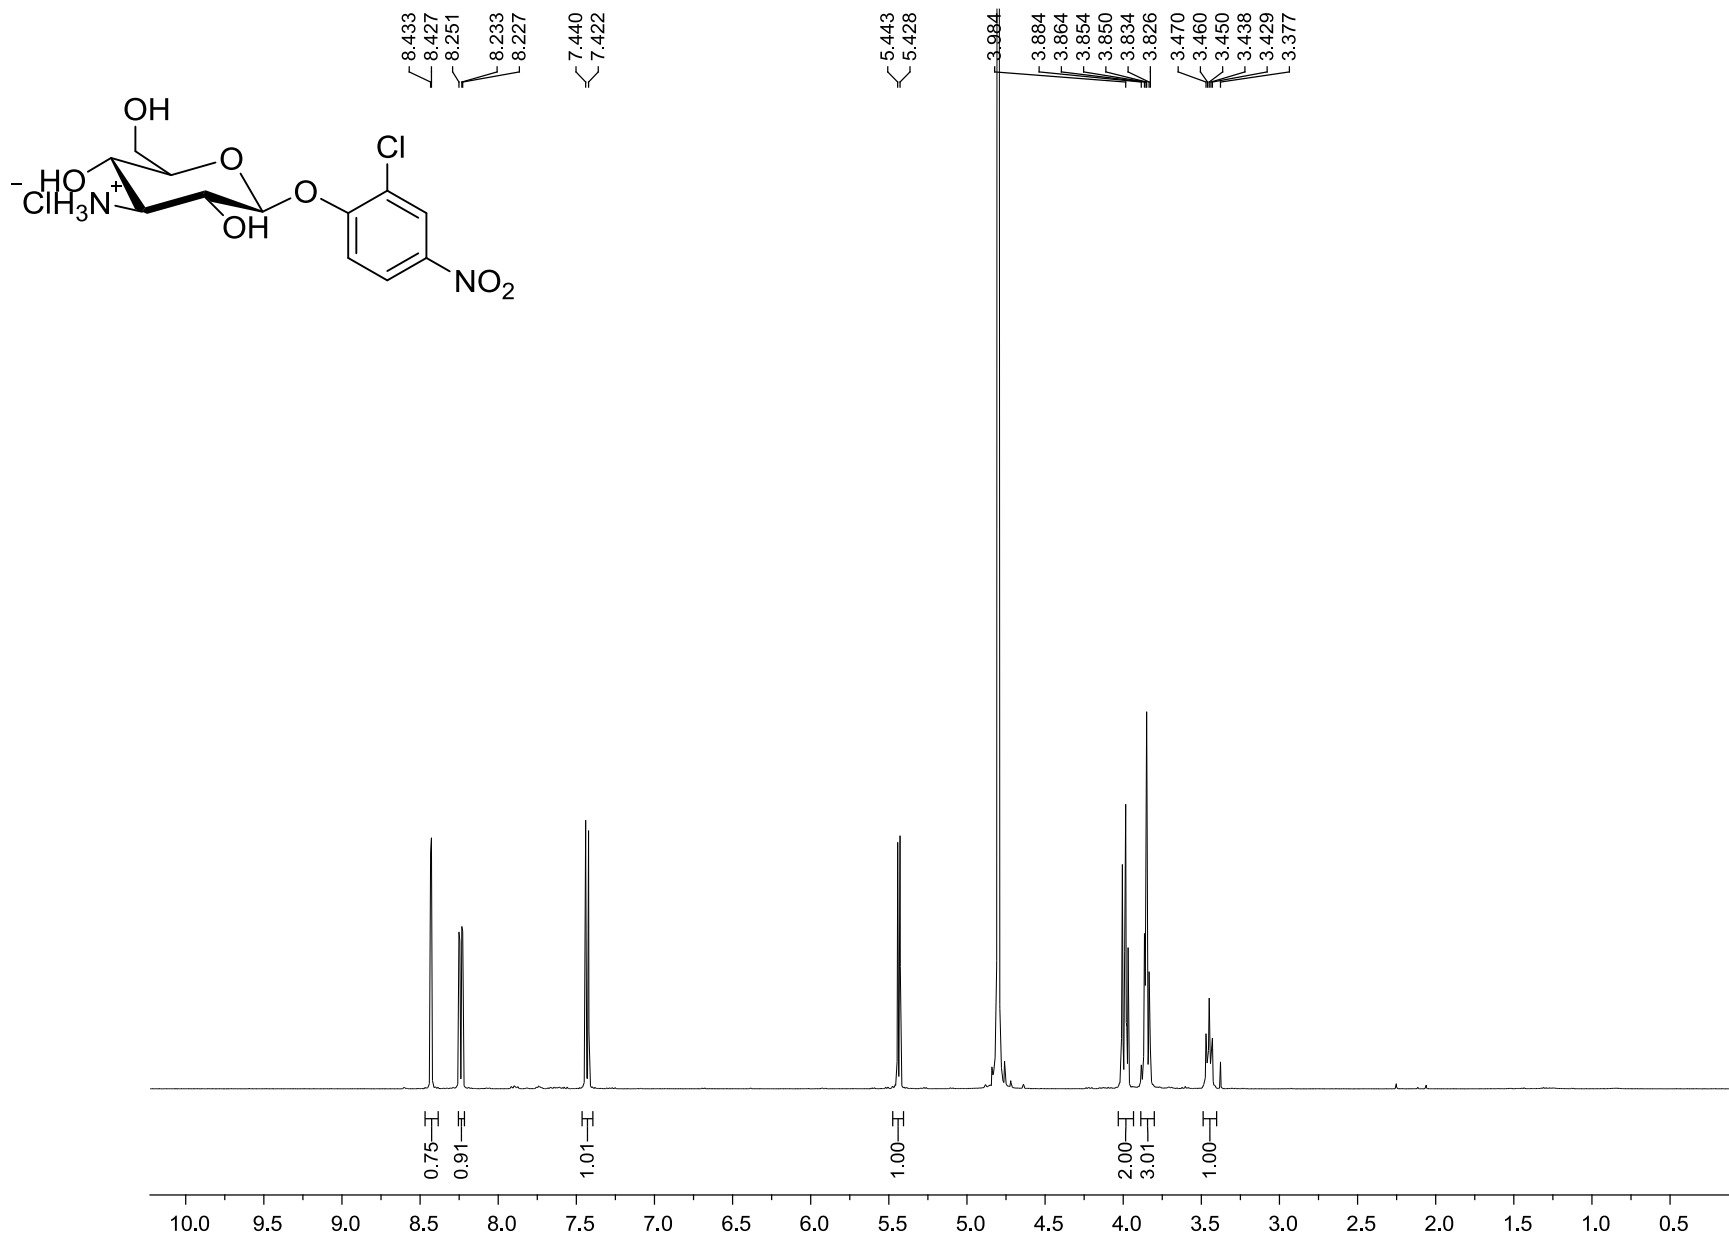

(2-chloro-4-nitrophenyl)-3-deoxy-3-amino- $\beta$ -D-glucopyranoside hydrochloride (**7a**): gCOSY NMR ( $D_2O$ , 500 MHz)

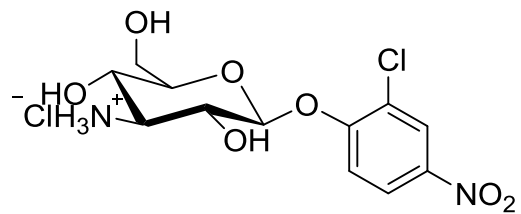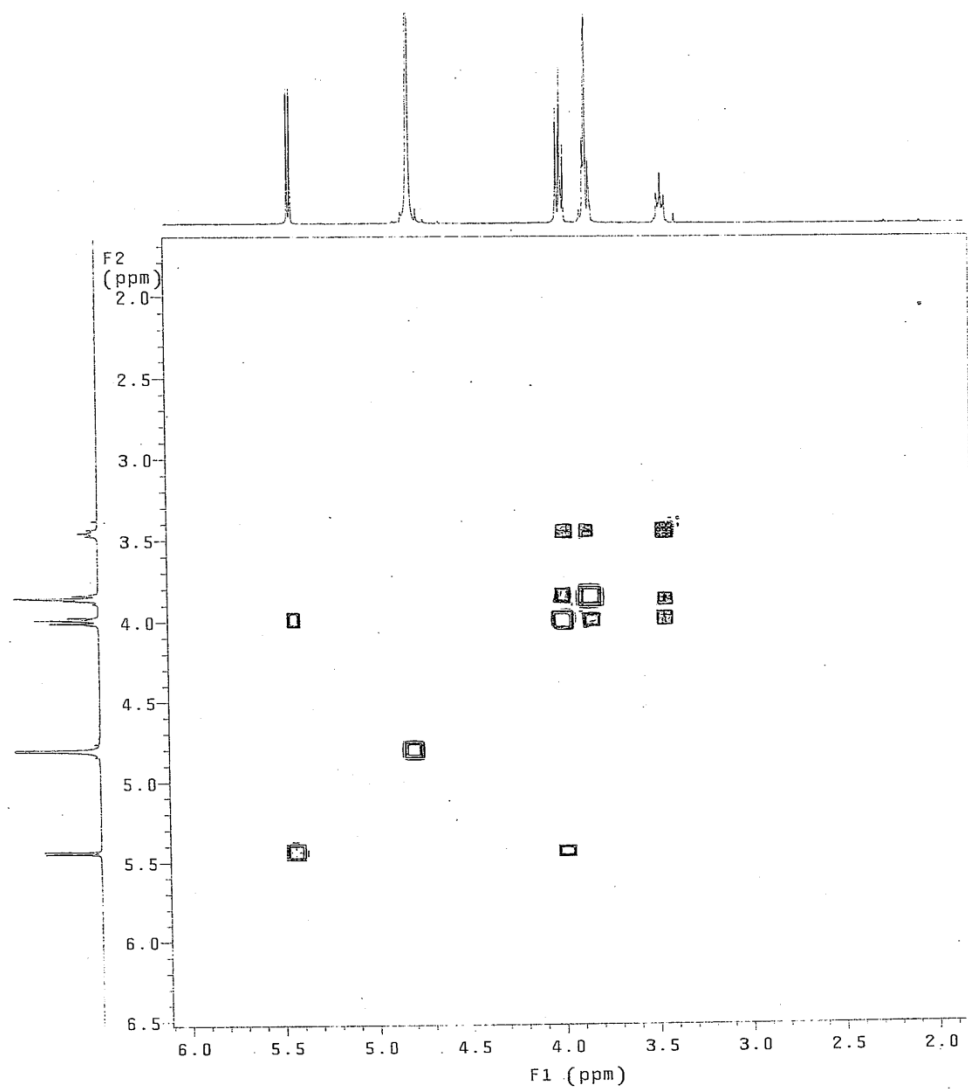

(2-chloro-4-nitrophenyl)-3-deoxy-3-amino-β-D-glucopyranoside hydrochloride (**7a**): <sup>13</sup>C NMR (D<sub>2</sub>O, 100 MHz)

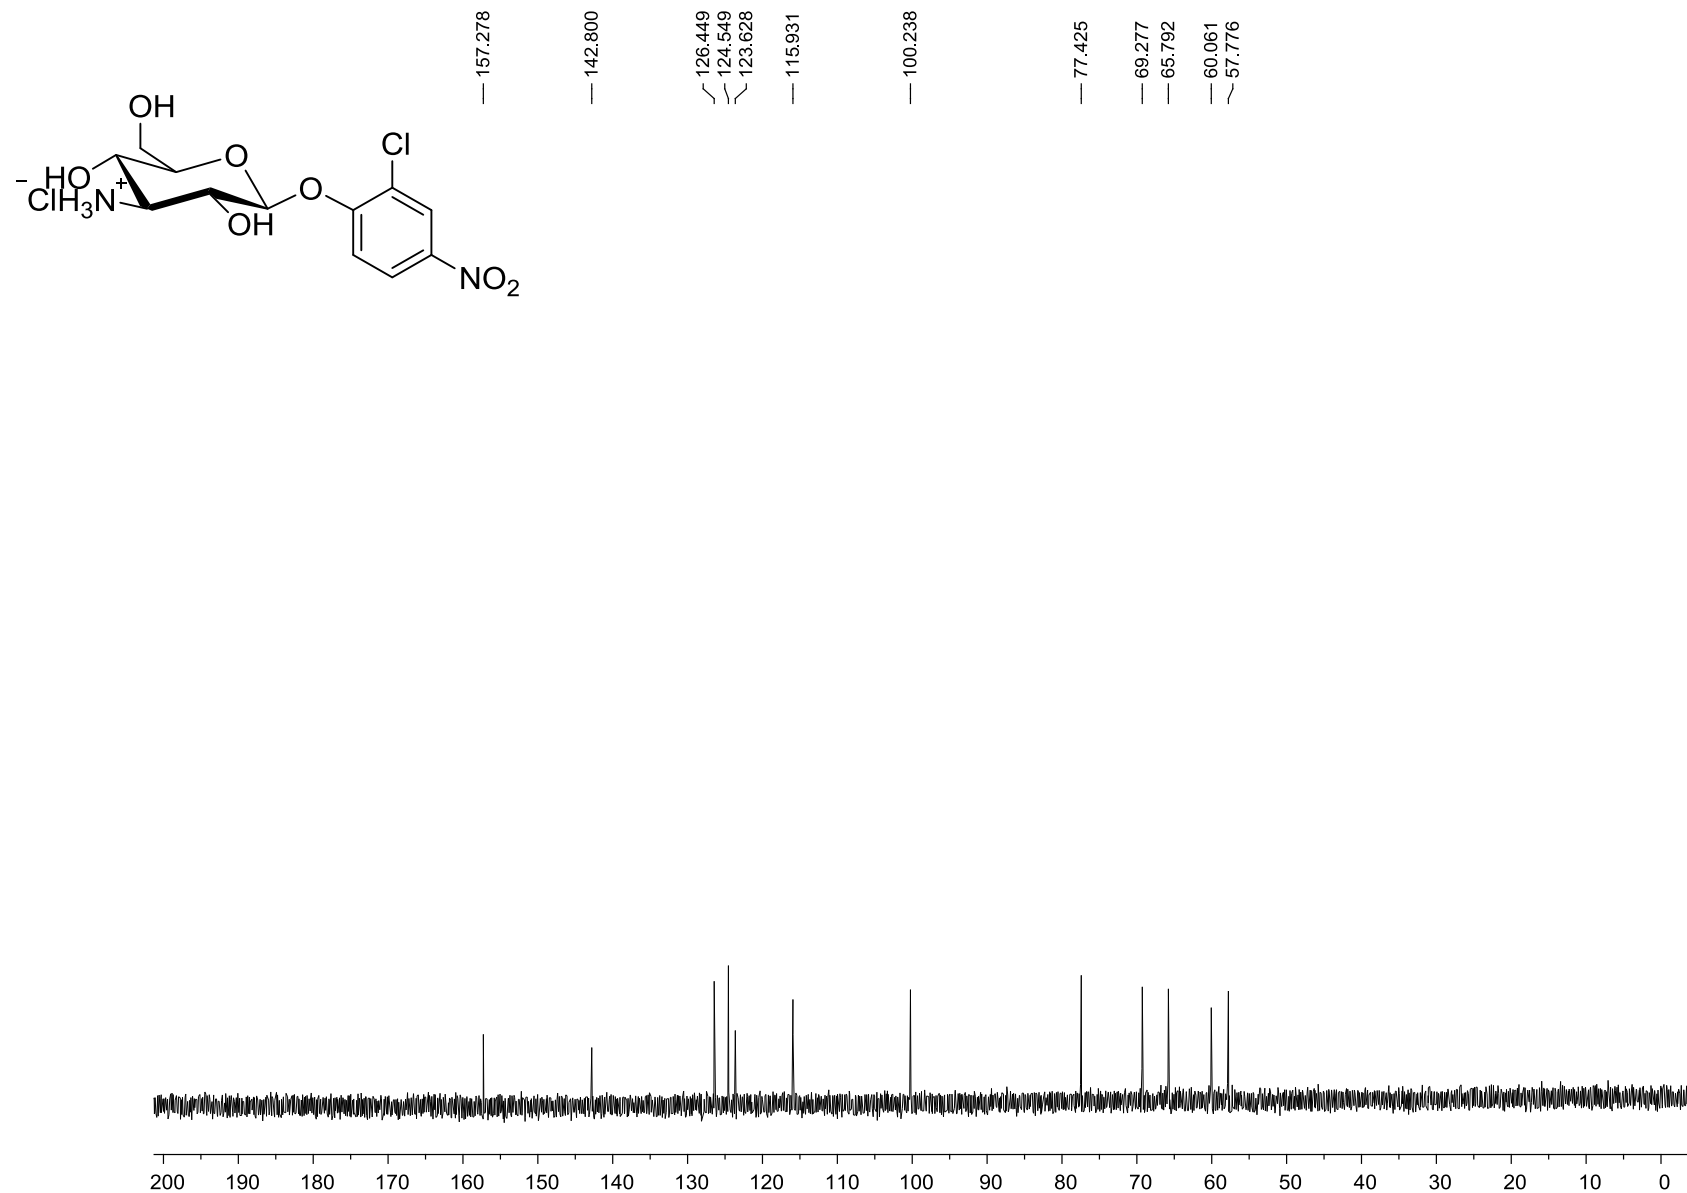

(2-chloro-4-nitrophenyl)-4-deoxy-4-azido- $\beta$ -D-glucopyranoside (**8**):  $^1\text{H}$  NMR ( $\text{CD}_3\text{OD}$ , 400 MHz)

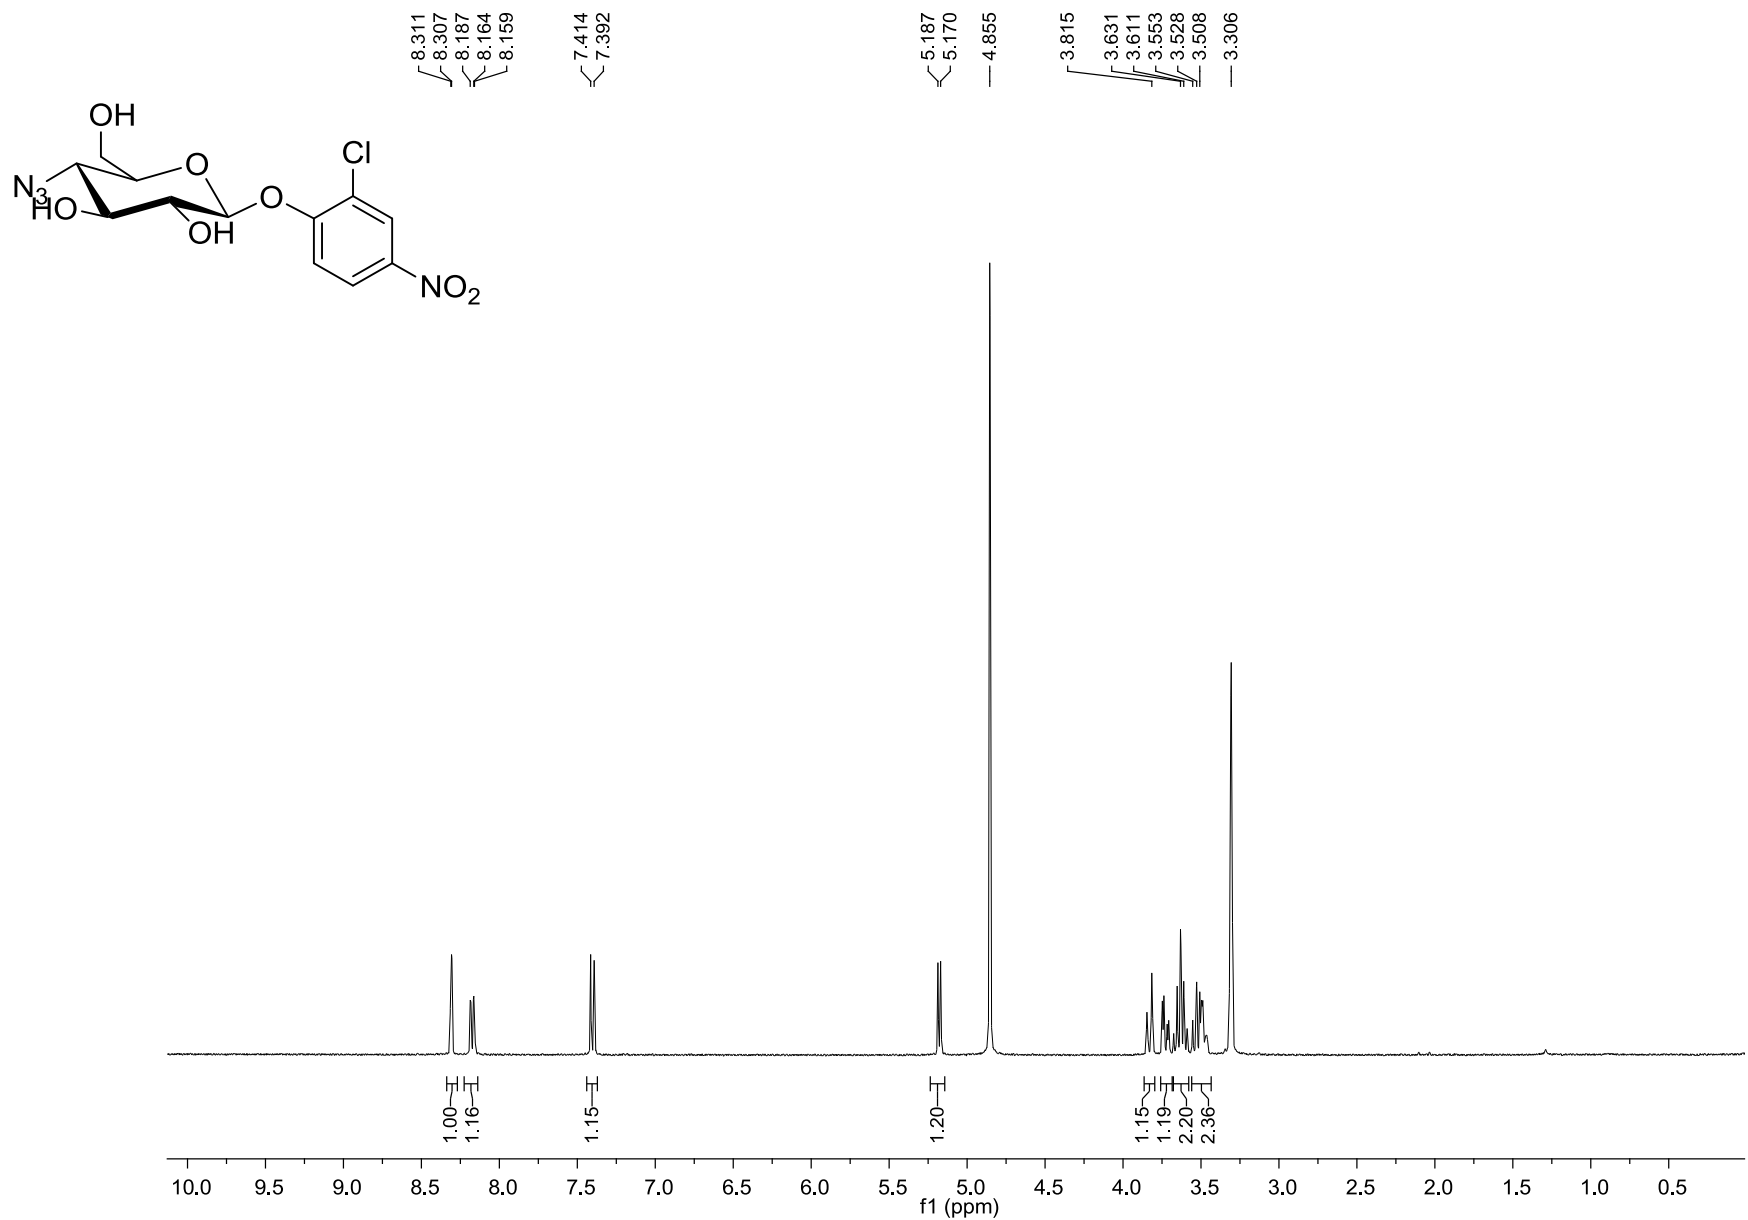



(2-chloro-4-nitrophenyl)-4-deoxy-4-azido- $\beta$ -D-glucopyranoside (**8**): gCOSY NMR ( $\text{CD}_3\text{OD}$ , 400 MHz)

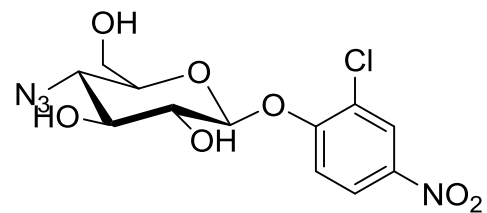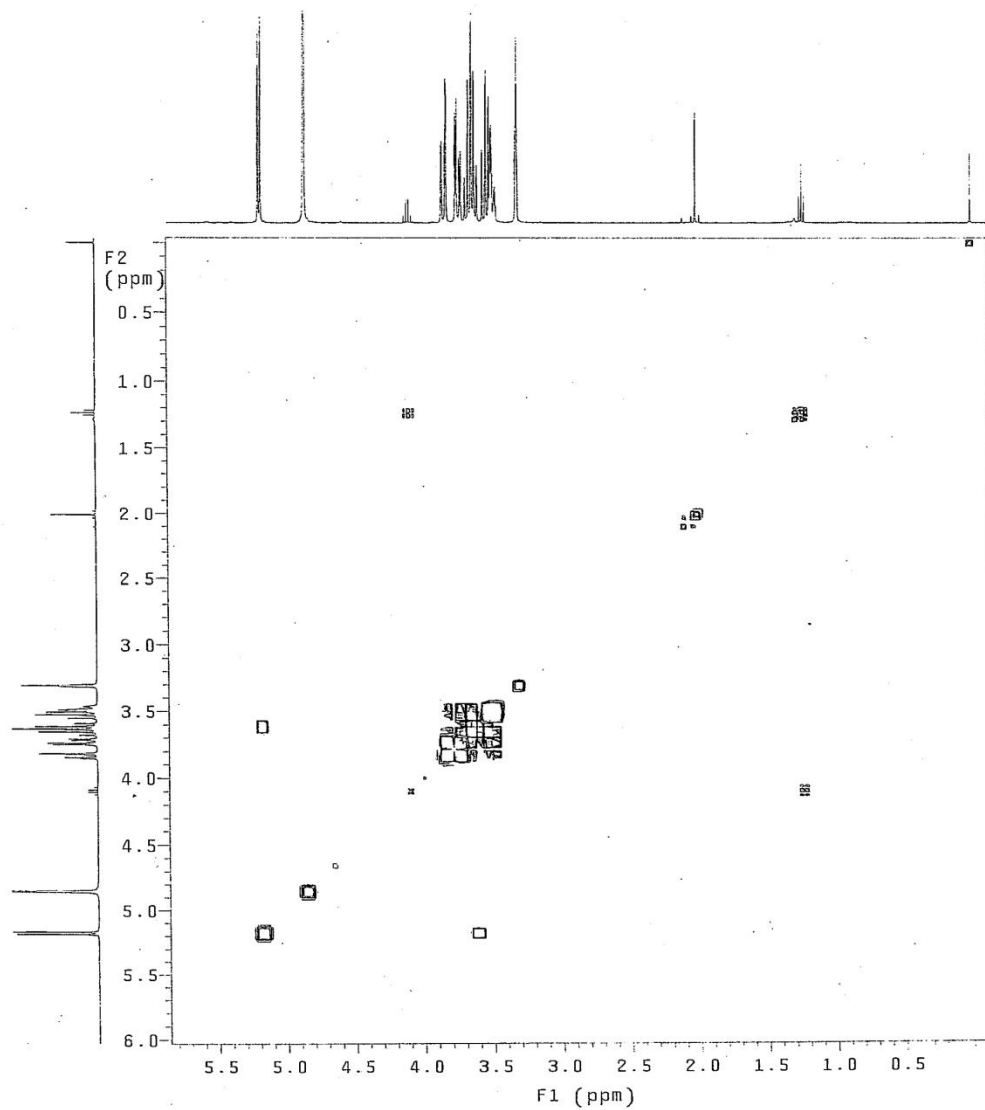

S53

(2-chloro-4-nitrophenyl)-4-deoxy-4-azido- $\beta$ -D-glucopyranoside (**8**):  $^{13}\text{C}$  NMR ( $\text{CD}_3\text{OD}$ , 100 MHz)

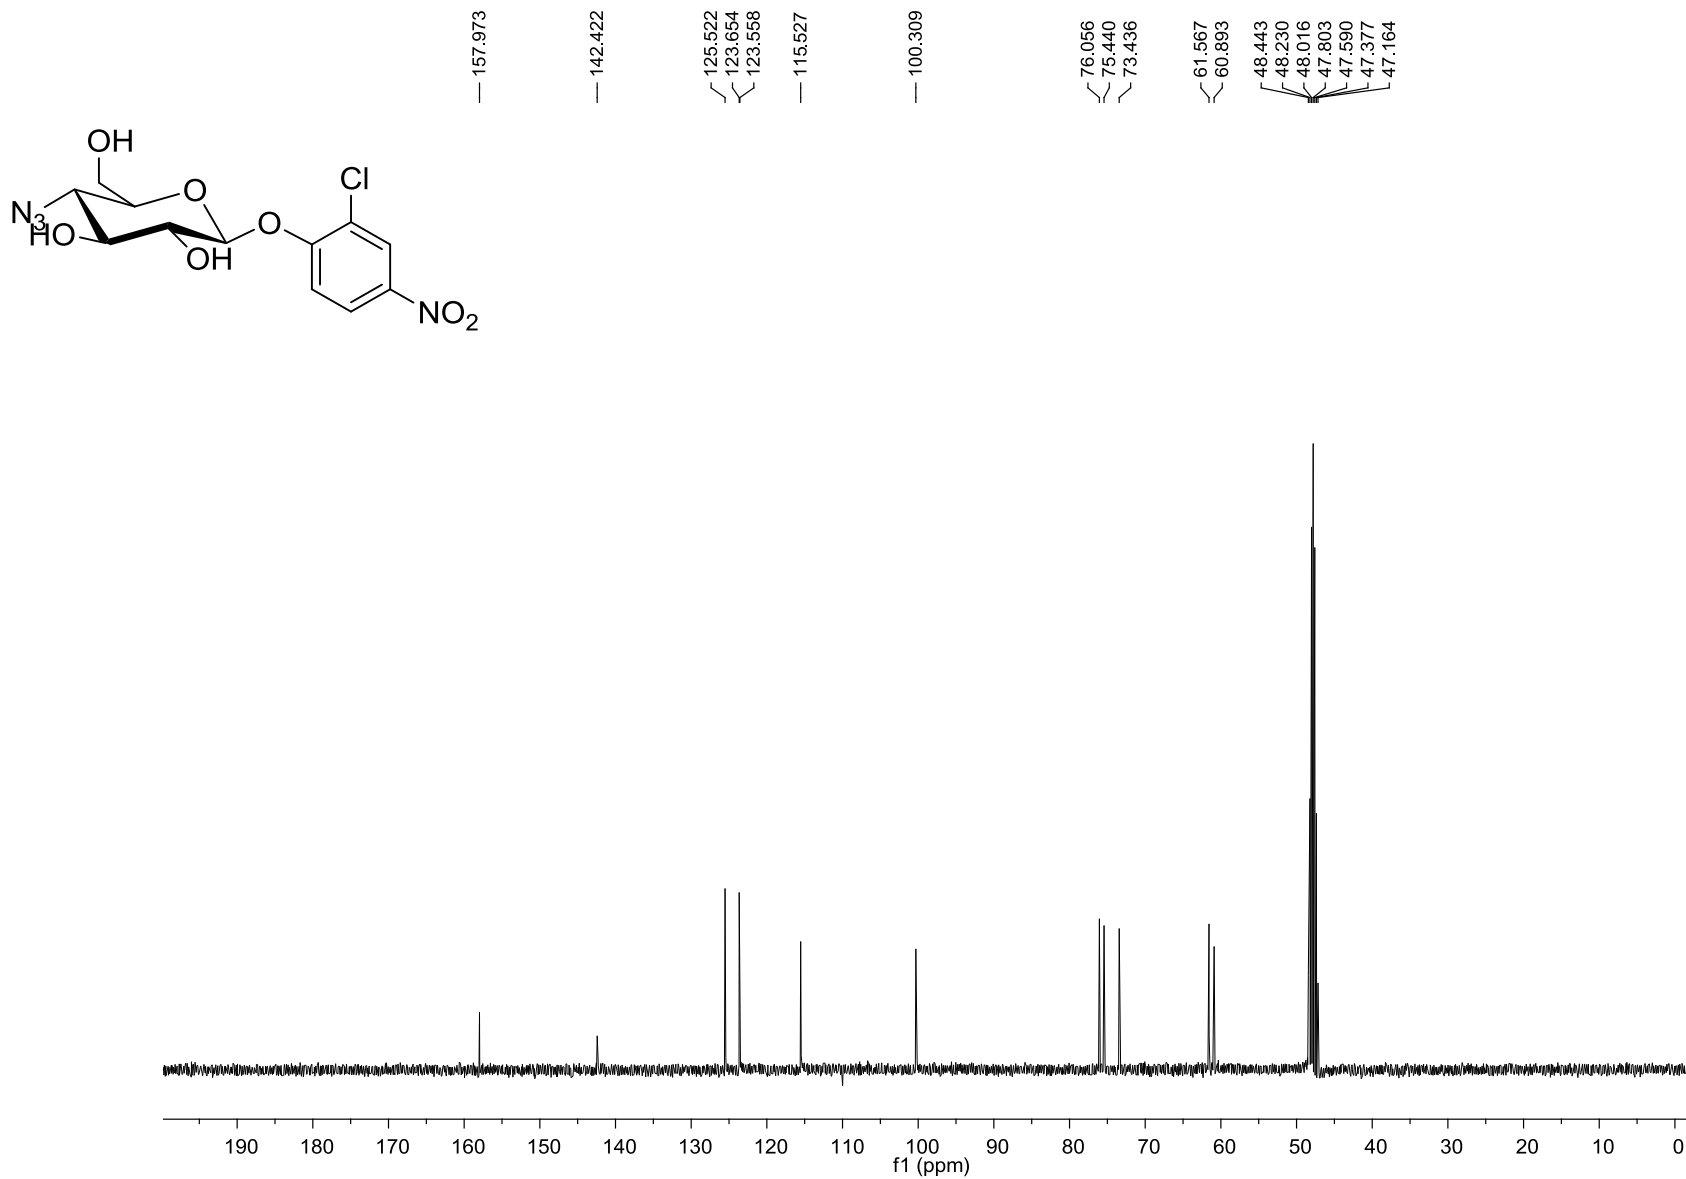

S54

(2-chloro-4-nitrophenyl)-4-deoxy-4-amino-β-D-glucopyranoside (**9**): <sup>1</sup>H NMR (CD<sub>3</sub>OD, 400 MHz)

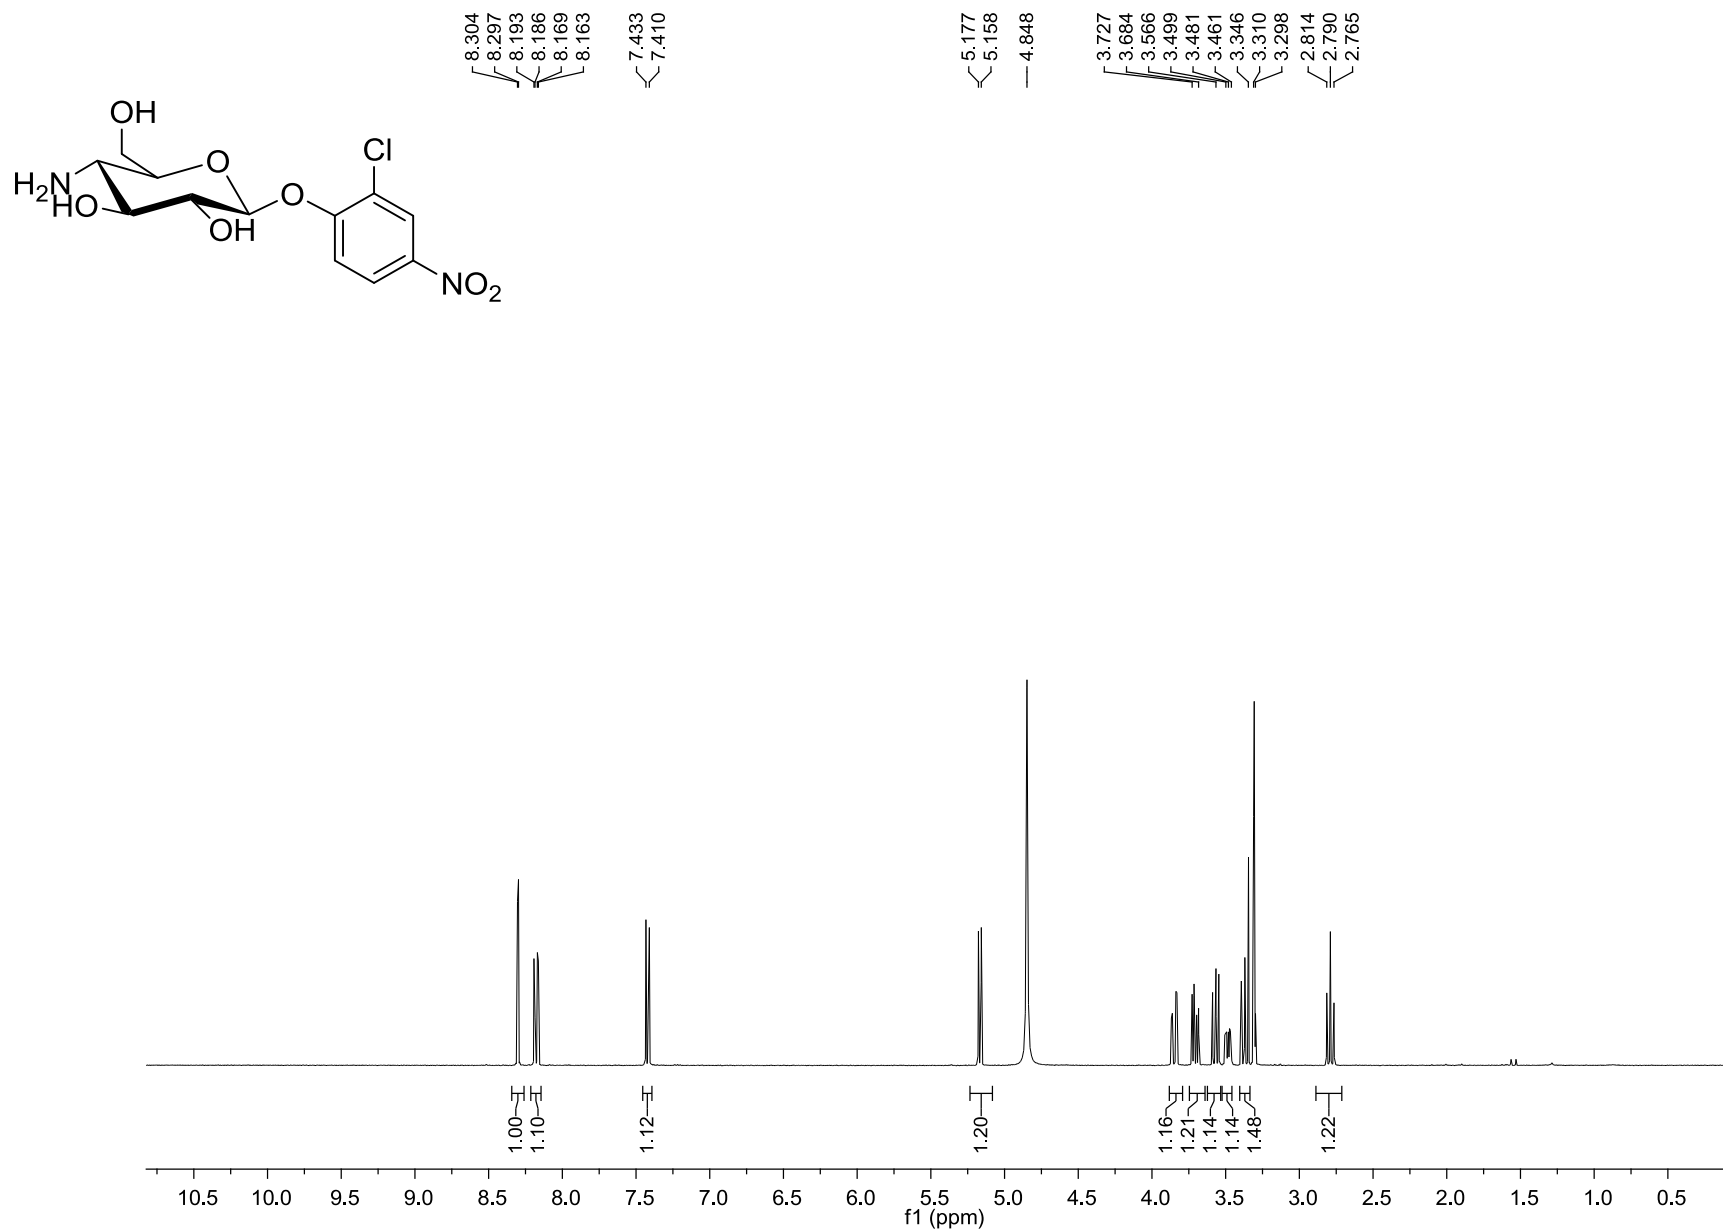

S55

(2-chloro-4-nitrophenyl)-4-deoxy-4-amino- $\beta$ -D-glucopyranoside (**9**): gCOSY NMR ( $\text{CD}_3\text{OD}$ , 400 MHz)

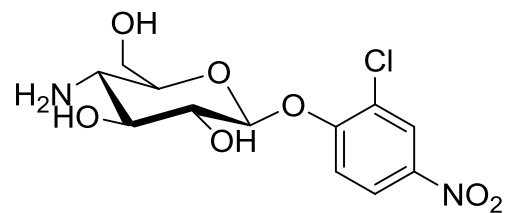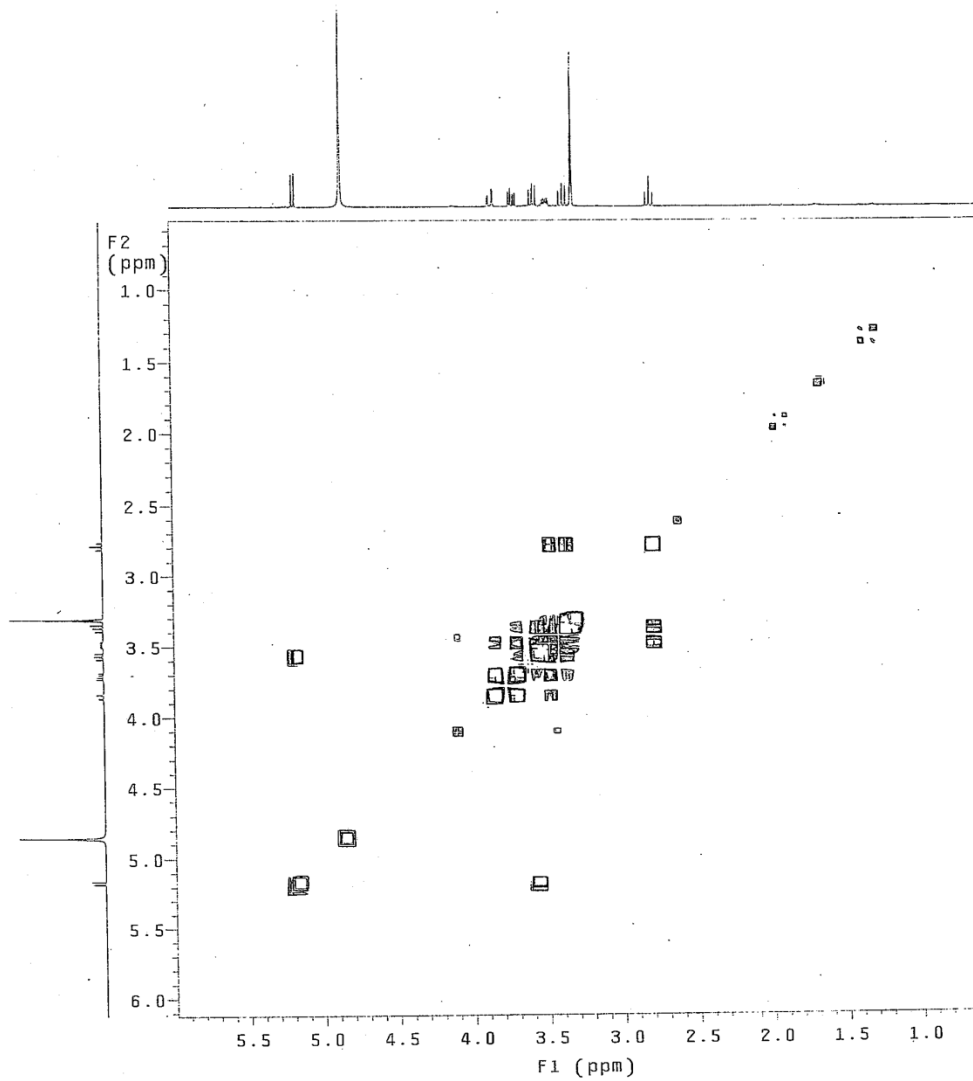

(2-chloro-4-nitrophenyl)-4-deoxy-4-amino- $\beta$ -D-glucopyranoside (**9**):  $^{13}\text{C}$  NMR ( $\text{CD}_3\text{OD}$ , 100 MHz)

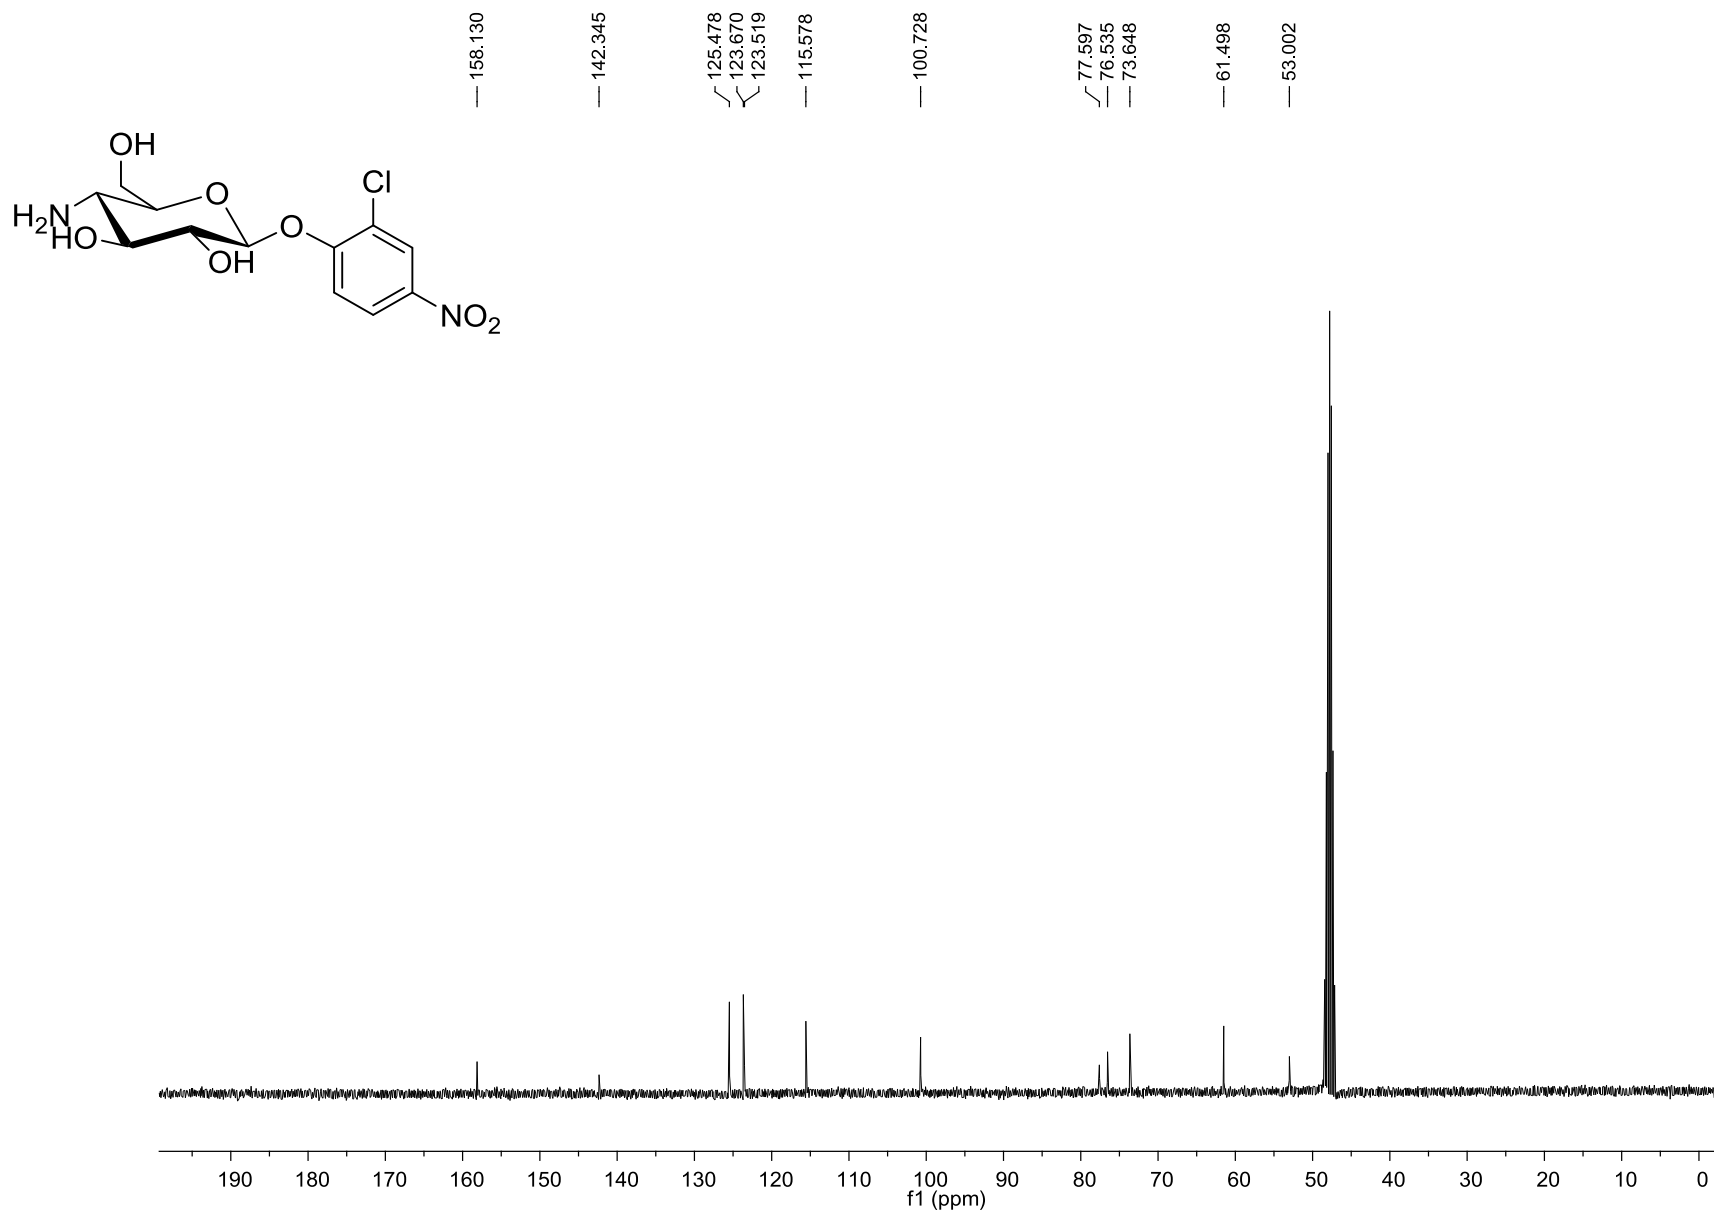

(2-chloro-4-nitrophenyl)-4-deoxy-4-amino-β-D-glucopyranoside hydrochloride (**9a**): <sup>1</sup>H NMR (D<sub>2</sub>O, 500 MHz)

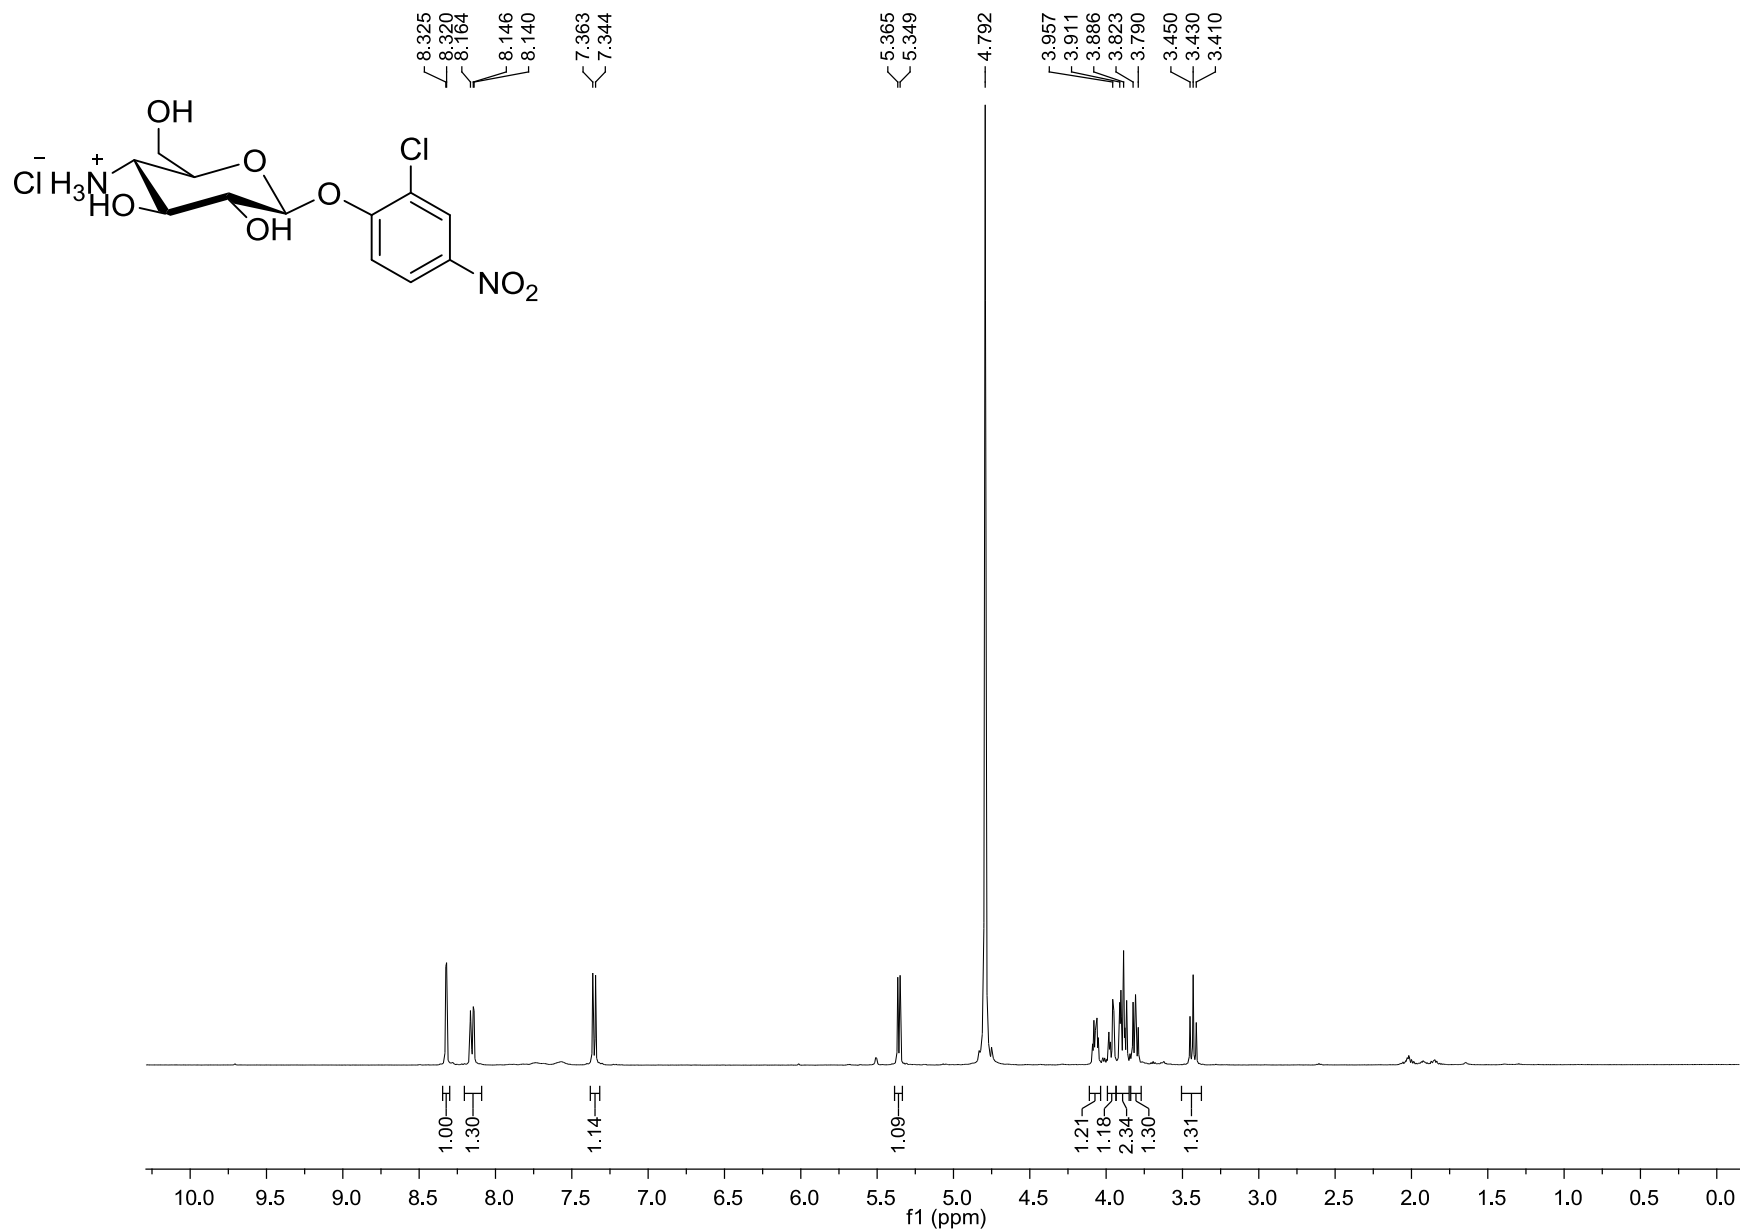

(2-chloro-4-nitrophenyl)-4-deoxy-4-amino- $\beta$ -D-glucopyranoside hydrochloride (**9a**):  $^{13}\text{C}$  NMR ( $\text{D}_2\text{O}$ , 125 MHz)

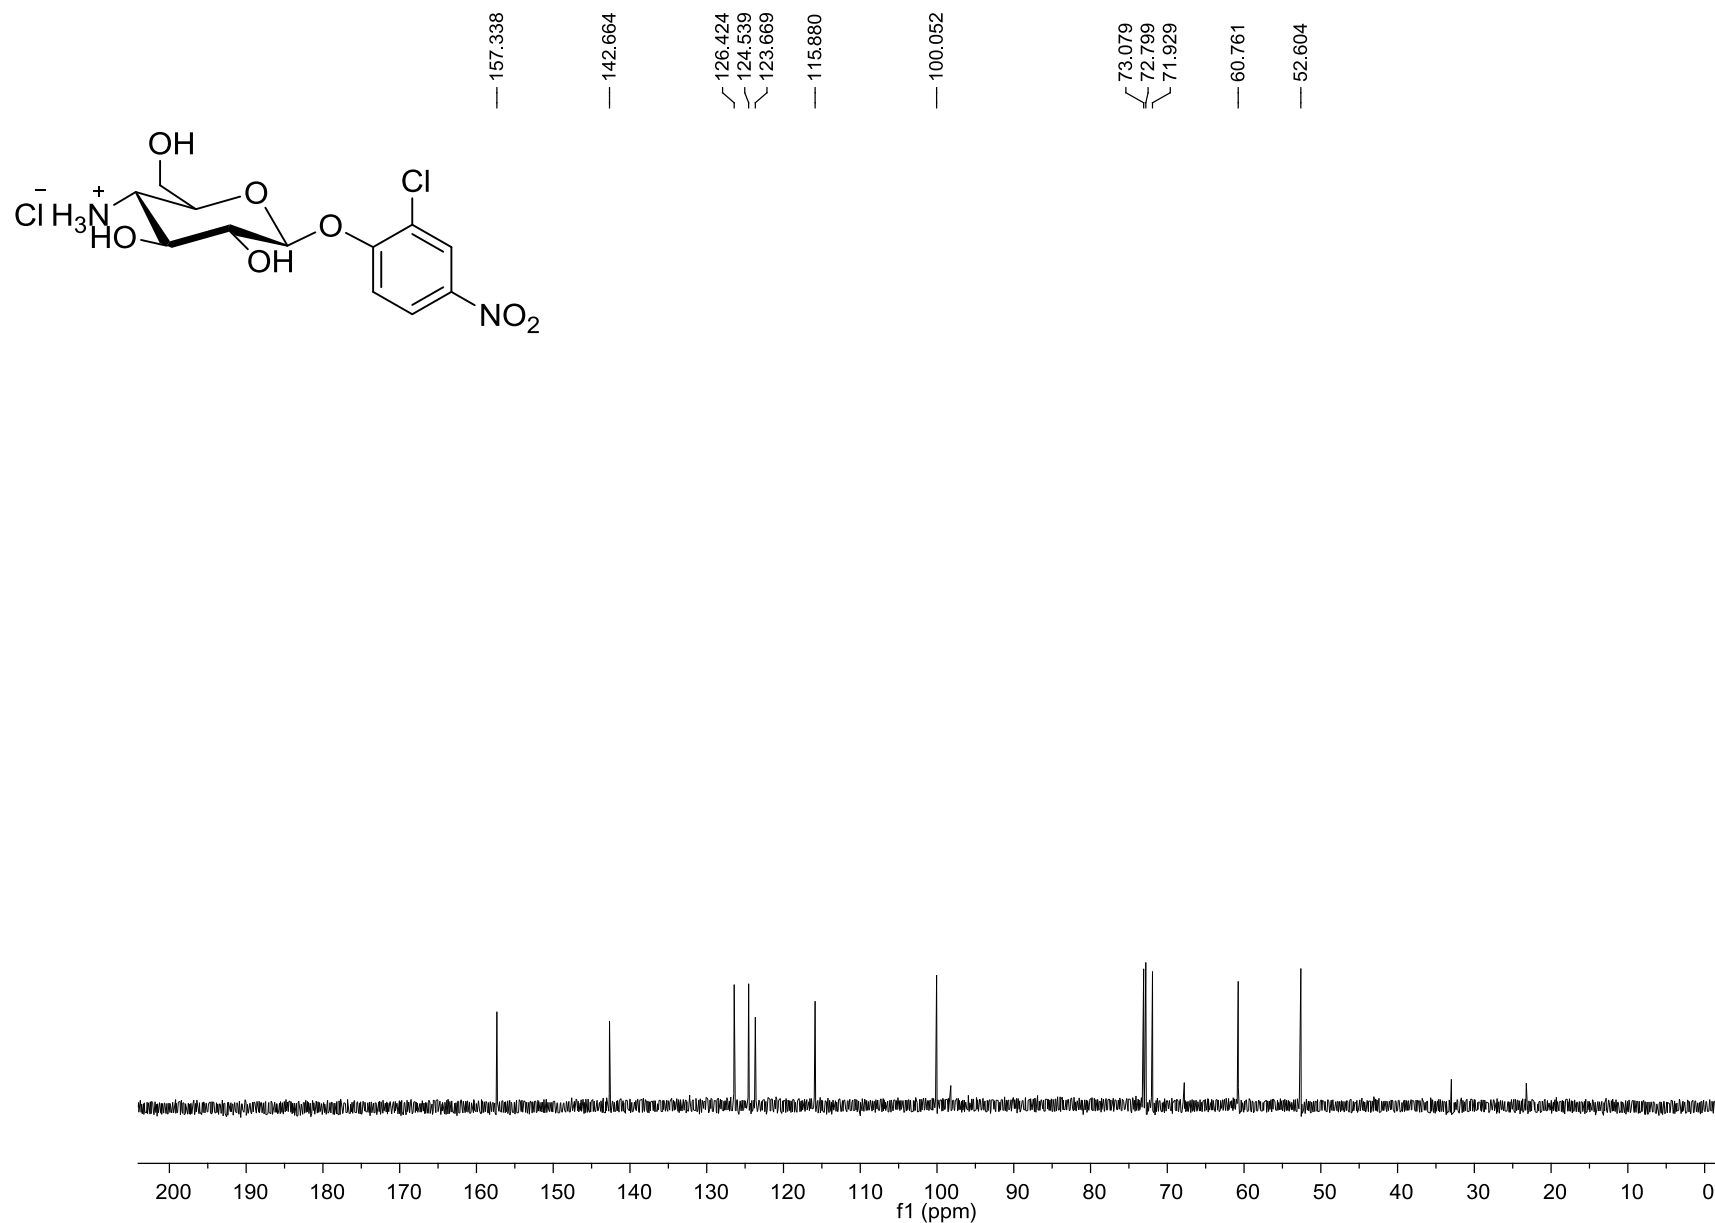

(2-chloro-4-nitrophenyl)-2-deoxy-2-azido-β-D-xylopyranoside (**10**): <sup>1</sup>H NMR (CD<sub>3</sub>OD, 500 MHz)

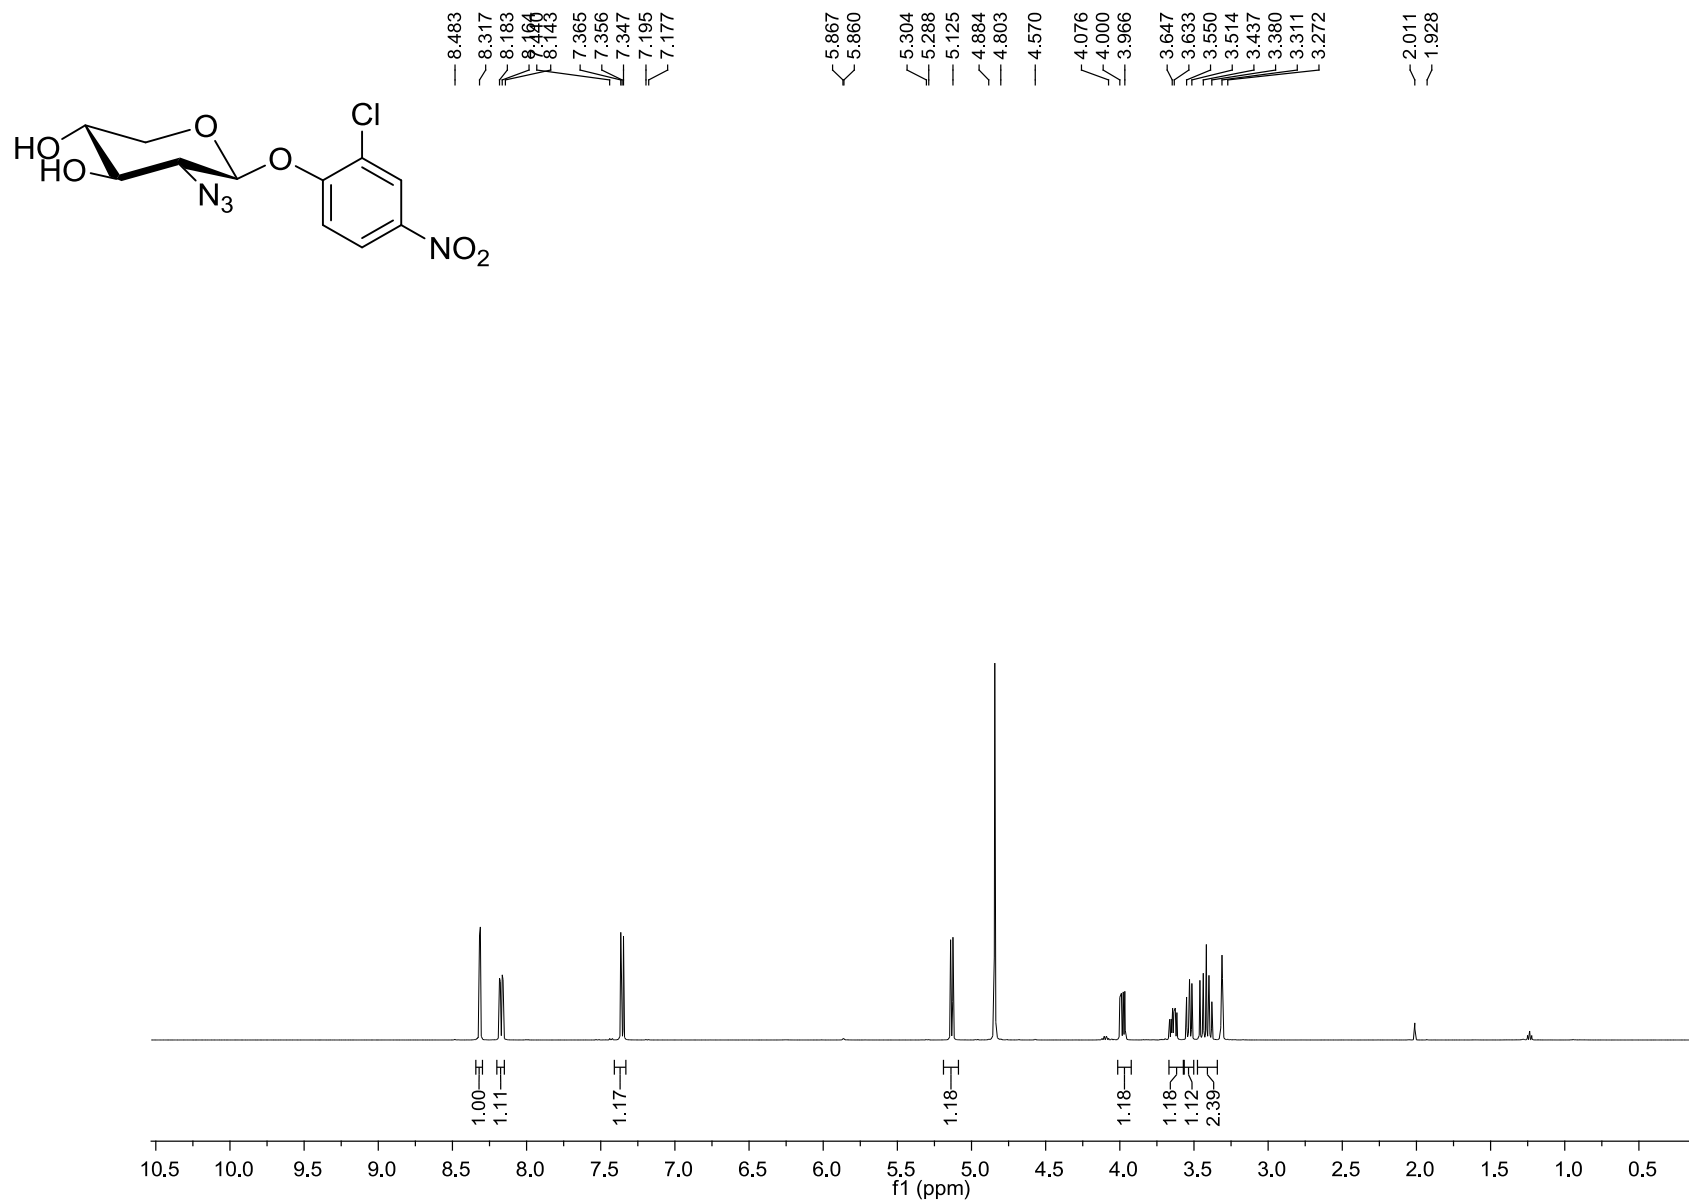



(2-chloro-4-nitrophenyl)-2-deoxy-2-azido- $\beta$ -D-xylopyranoside (**10**): gCOSY NMR ( $\text{CD}_3\text{OD}$ , 500 MHz)

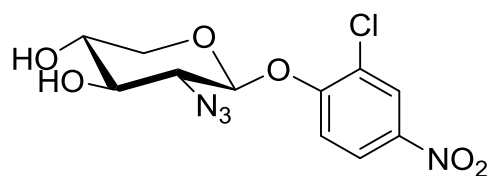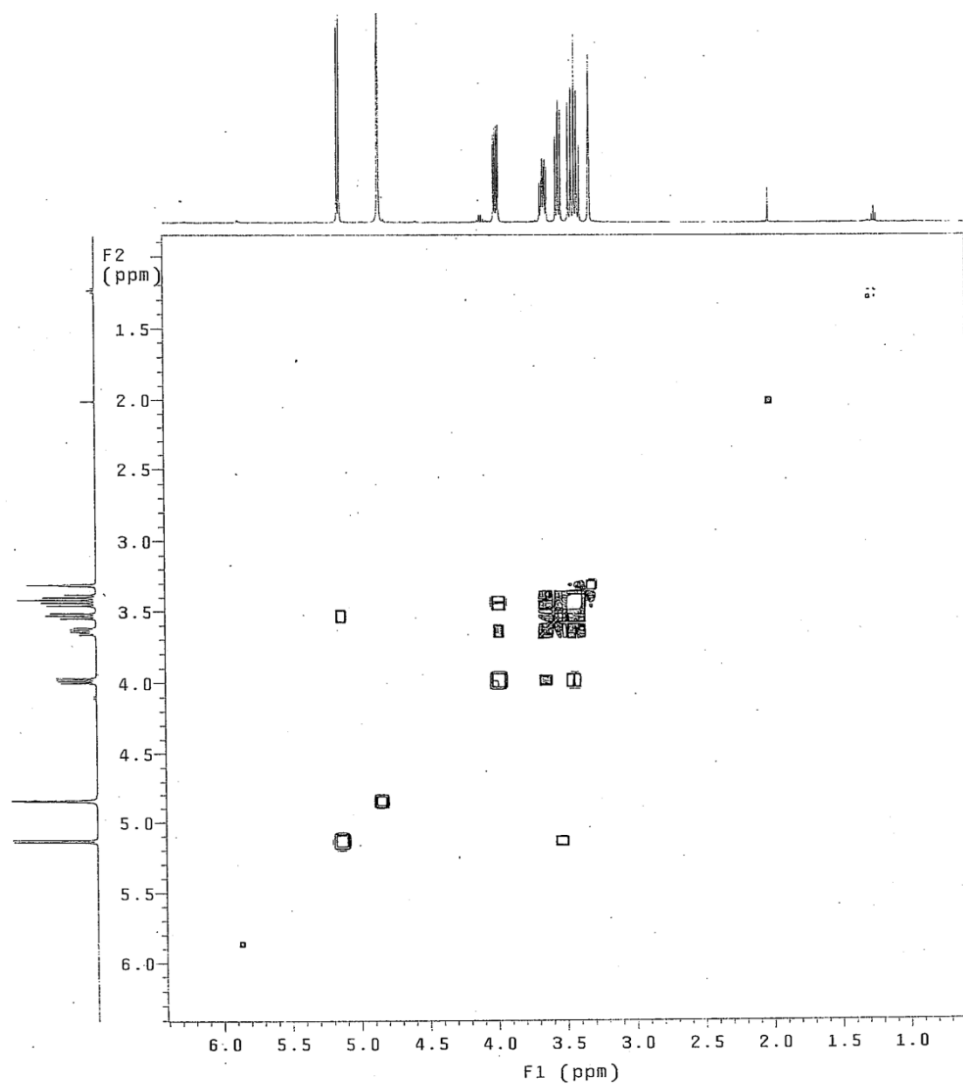

(2-chloro-4-nitrophenyl)-2-deoxy-2-azido-β-D-xylopyranoside (**10**): <sup>13</sup>C NMR (CD<sub>3</sub>OD, 125 MHz)

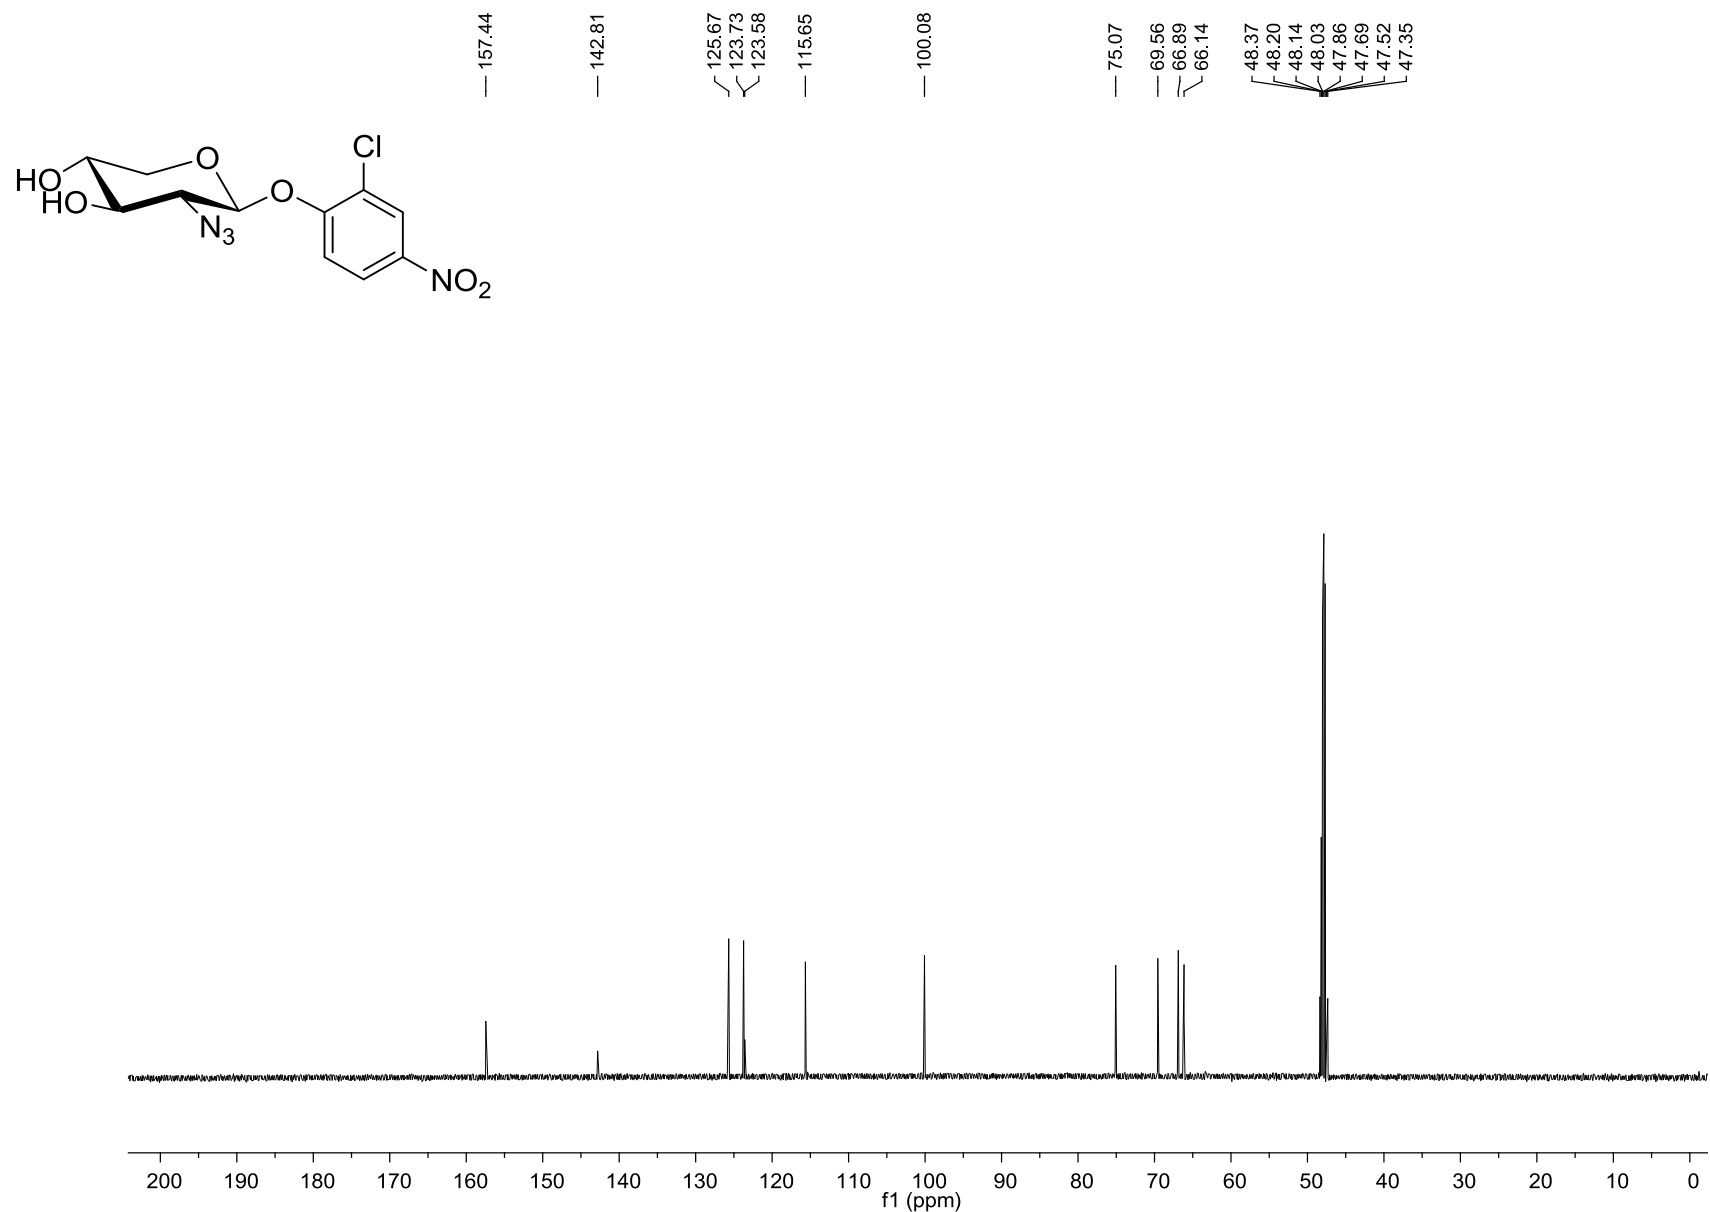

(2-chloro-4-nitrophenyl)-2-deoxy-2-amino-β-D-xylopyranoside (11): <sup>1</sup>H NMR (CD<sub>3</sub>OD, 400 MHz)

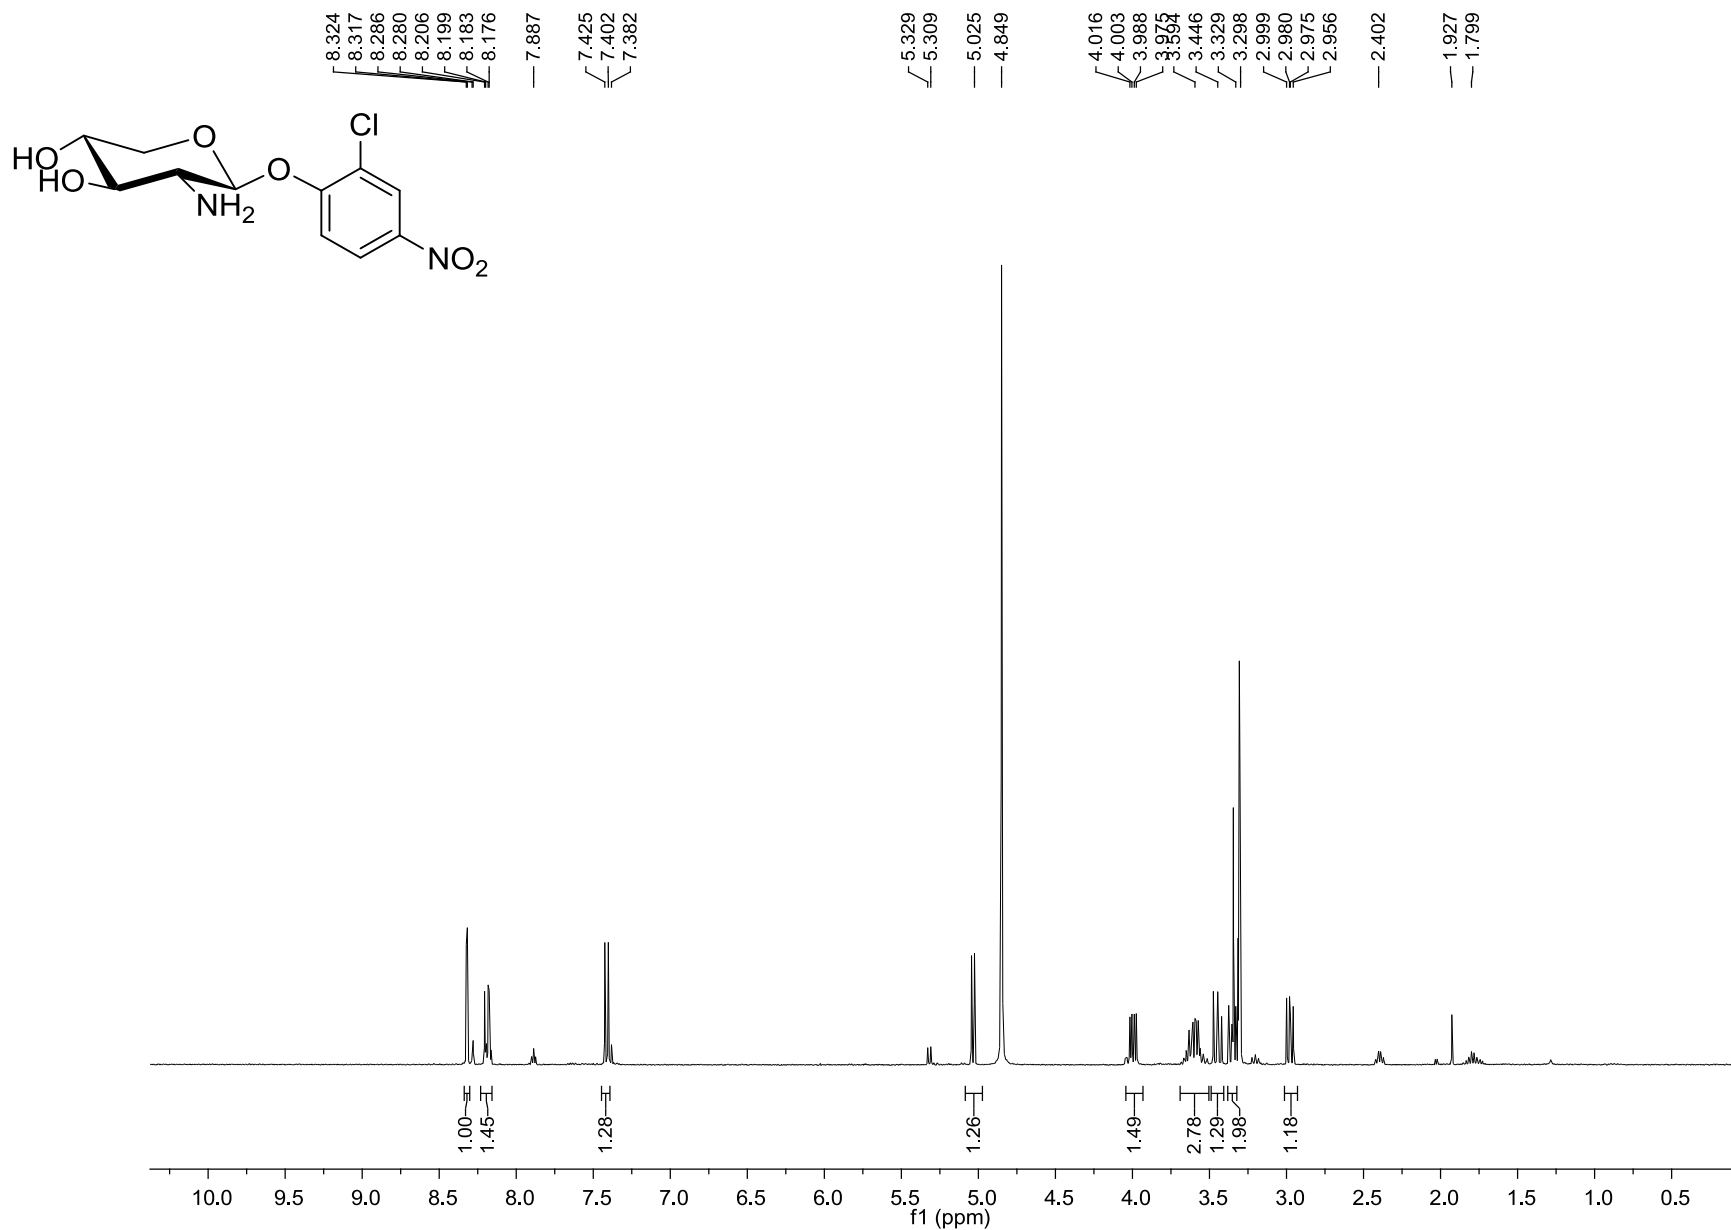

(2-chloro-4-nitrophenyl)-2-deoxy-2-amino- $\beta$ -D-xylopyranoside (**11**): gCOSY (CD<sub>3</sub>OD, 400 MHz)

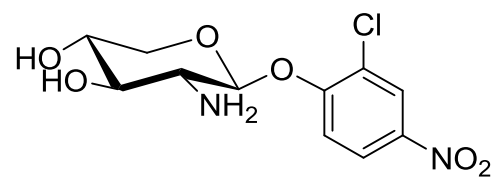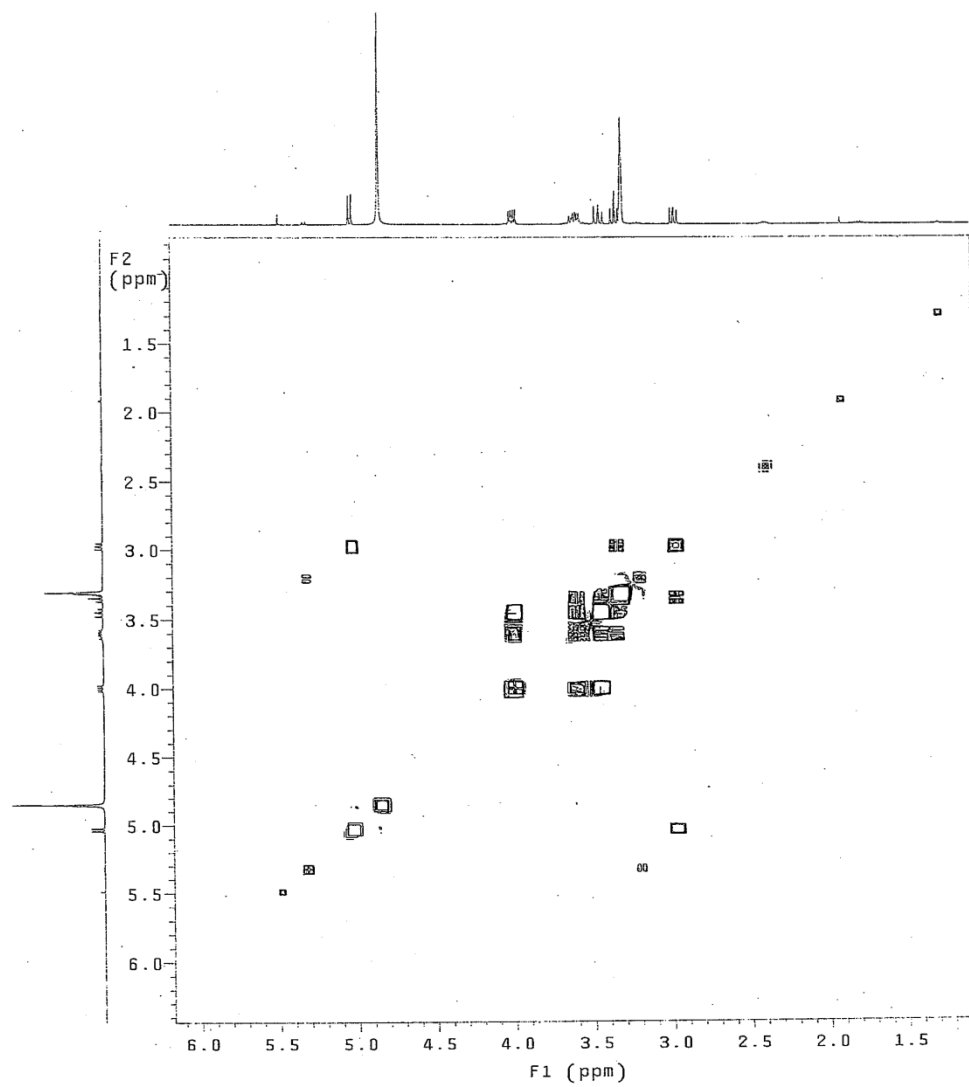

(2-chloro-4-nitrophenyl)-2-deoxy-2-amino-β-D-xylopyranoside (**11**): <sup>13</sup>C NMR (CD<sub>3</sub>OD, 100 MHz)

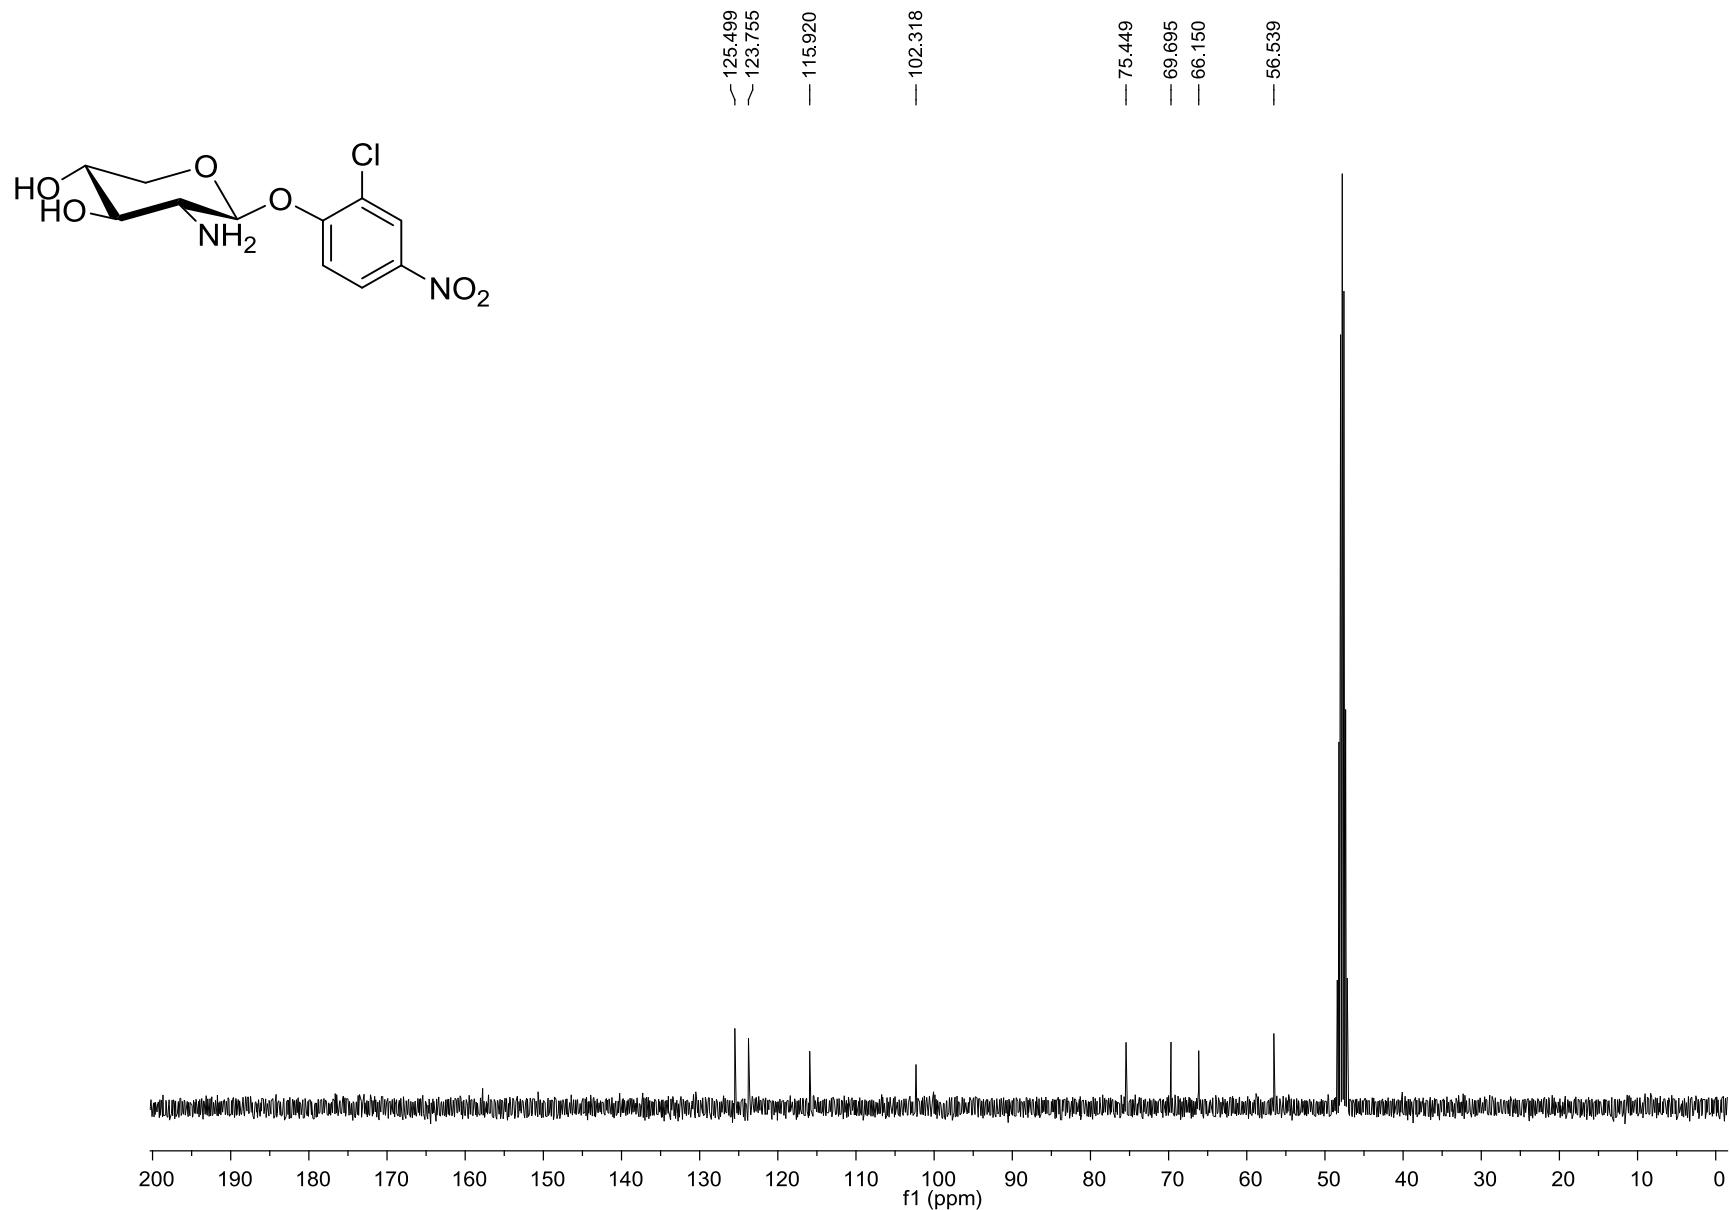

S65

(2-chloro-4-nitrophenyl)-2-deoxy-2-amino- $\beta$ -D-xylopyranoside hydrochloride (**11a**):  $^1\text{H}$  NMR ( $\text{D}_2\text{O}$ , 400 MHz)

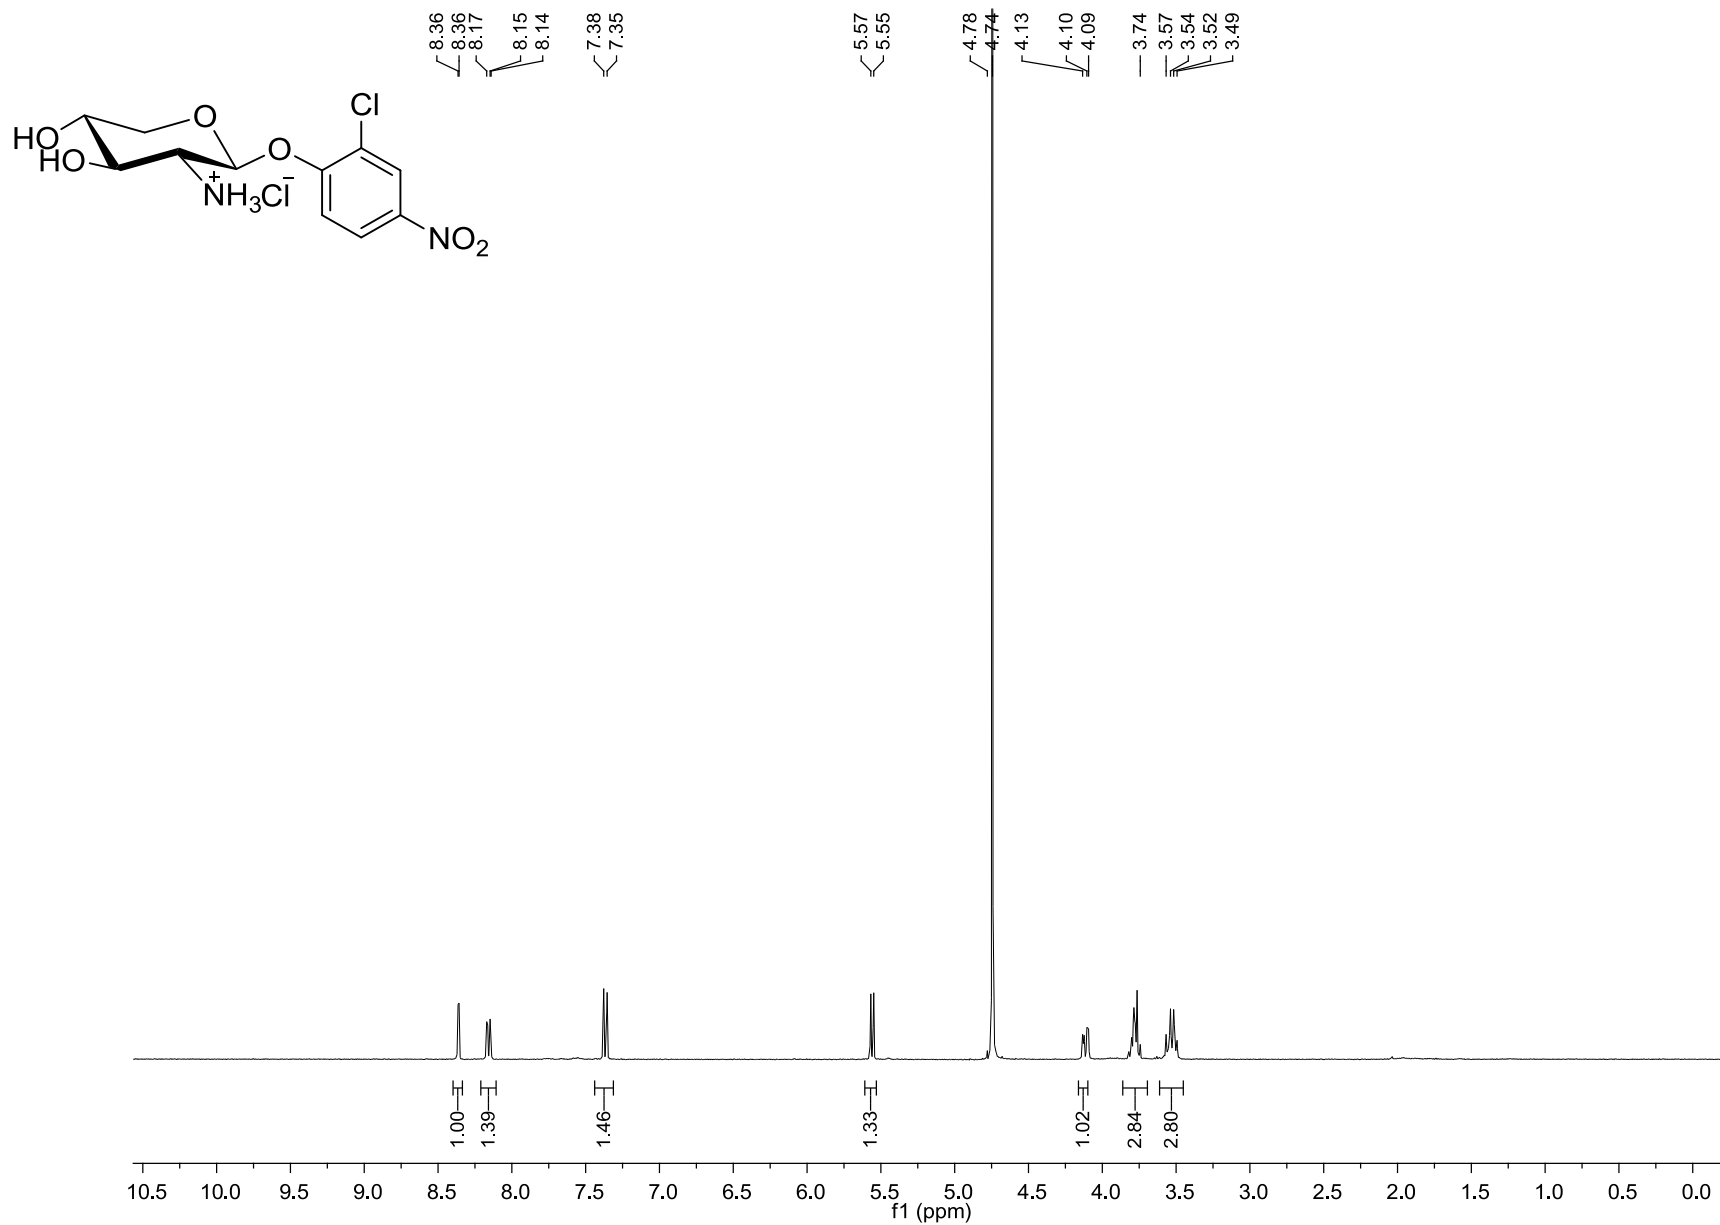

(2-chloro-4-nitrophenyl)-2-deoxy-2-amino- $\beta$ -D-xylopyranoside hydrochloride (**11a**): gCOSY NMR ( $D_2O$ , 400 MHz)

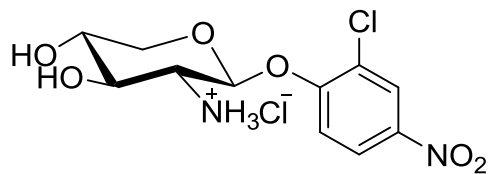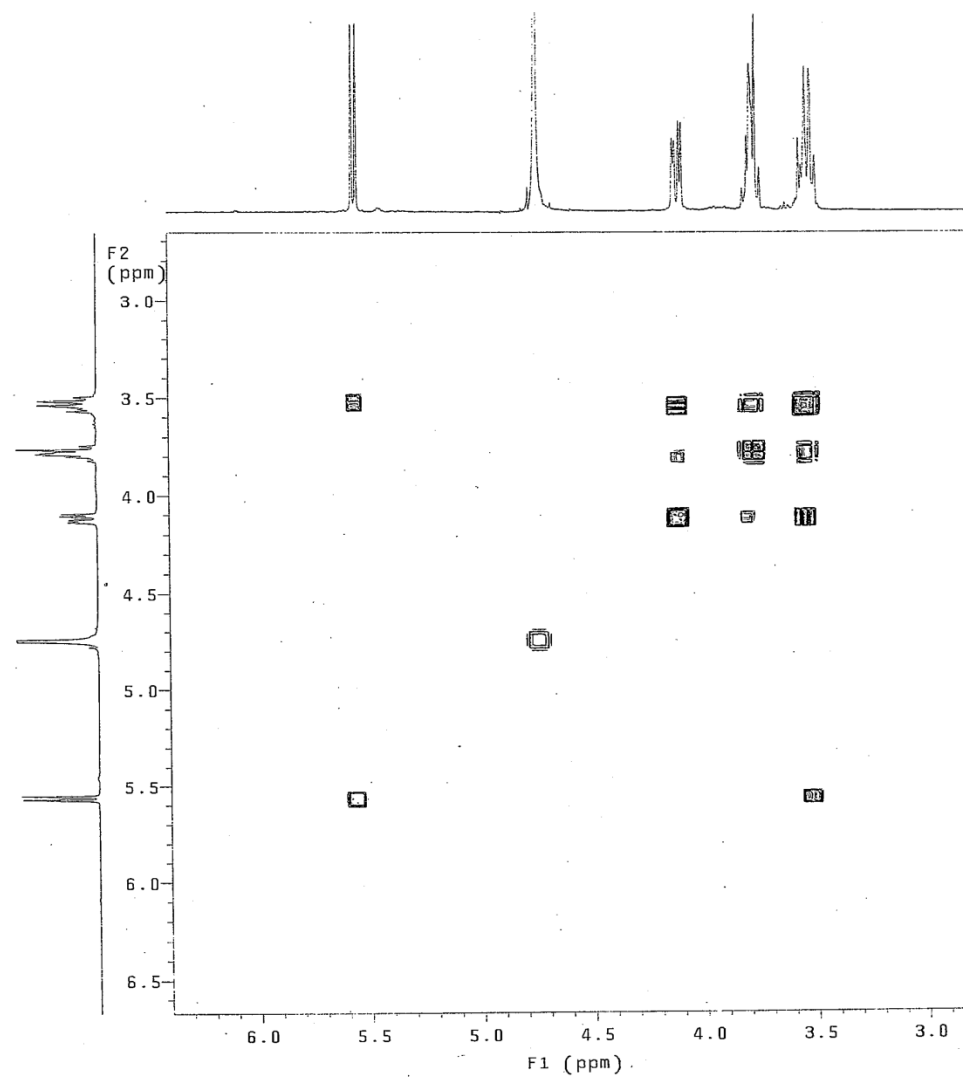

(2-chloro-4-nitrophenyl)-2-deoxy-2-amino- $\beta$ -D-xylopyranoside hydrochloride (**11a**):  $^{13}\text{C}$  NMR ( $\text{D}_2\text{O}$ , 100 MHz)

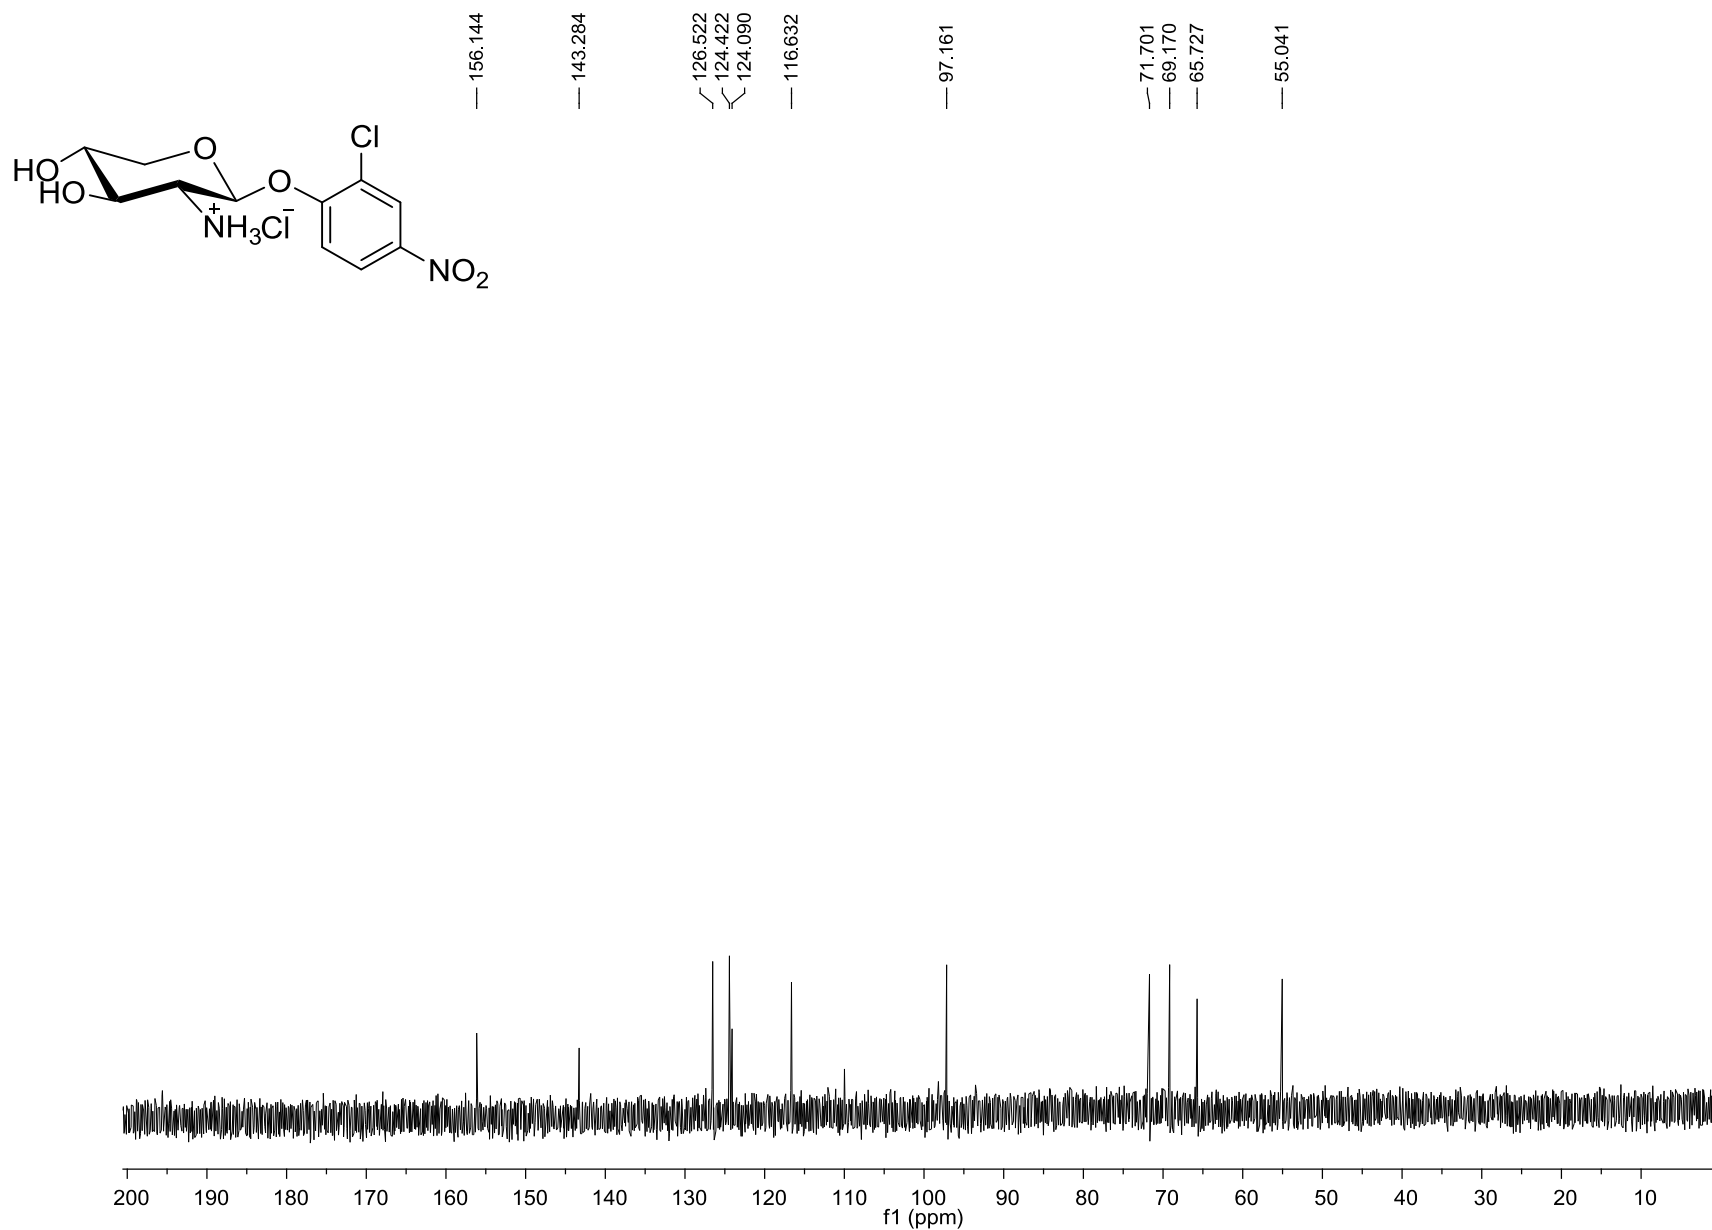

S68



(2-chloro-4-nitrophenyl)-4-deoxy-4-azido-β-D-xylopyranoside (**12**): <sup>1</sup>H NMR (CD<sub>3</sub>OD, 400 MHz)

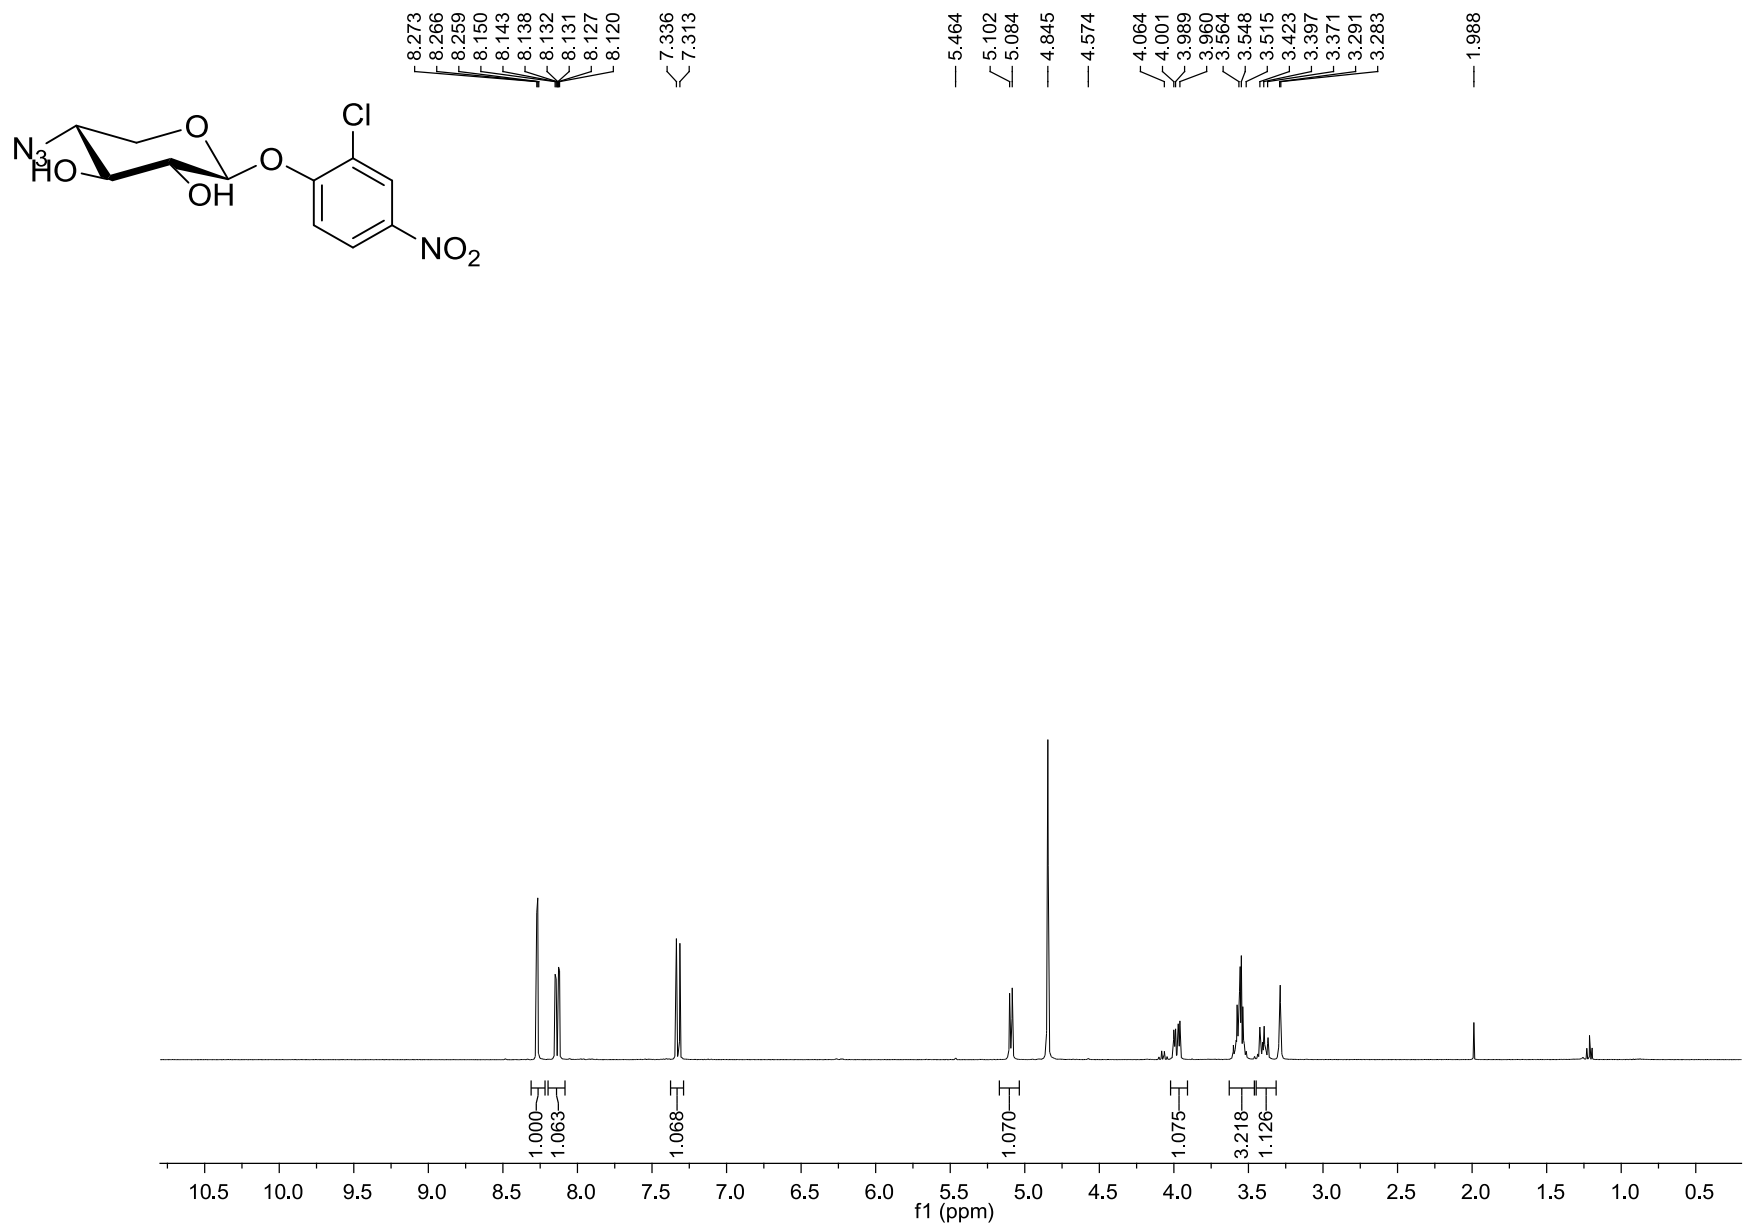

(2-chloro-4-nitrophenyl)-4-deoxy-4-azido- $\beta$ -D-xylopyranoside (**12**): gCOSY NMR ( $\text{CD}_3\text{OD}$ , 400 MHz)

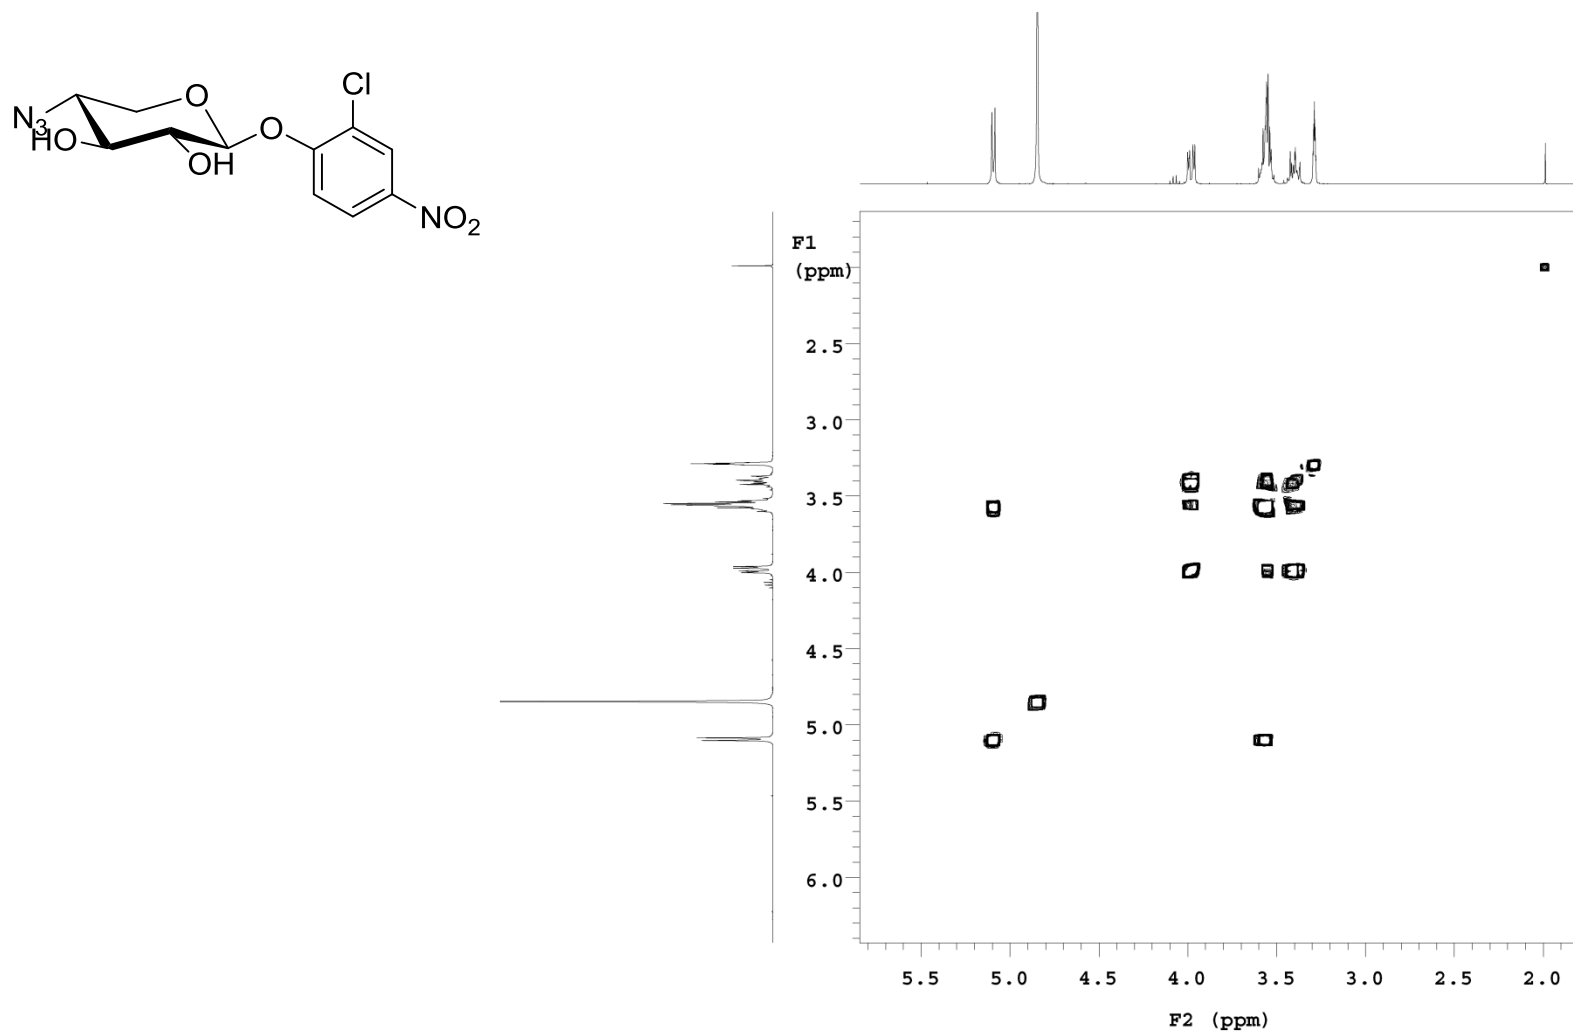

(2-chloro-4-nitrophenyl)-4-deoxy-4-azido-β-D-xylopyranoside (**12**): <sup>13</sup>C NMR (CD<sub>3</sub>OD, 400 MHz)

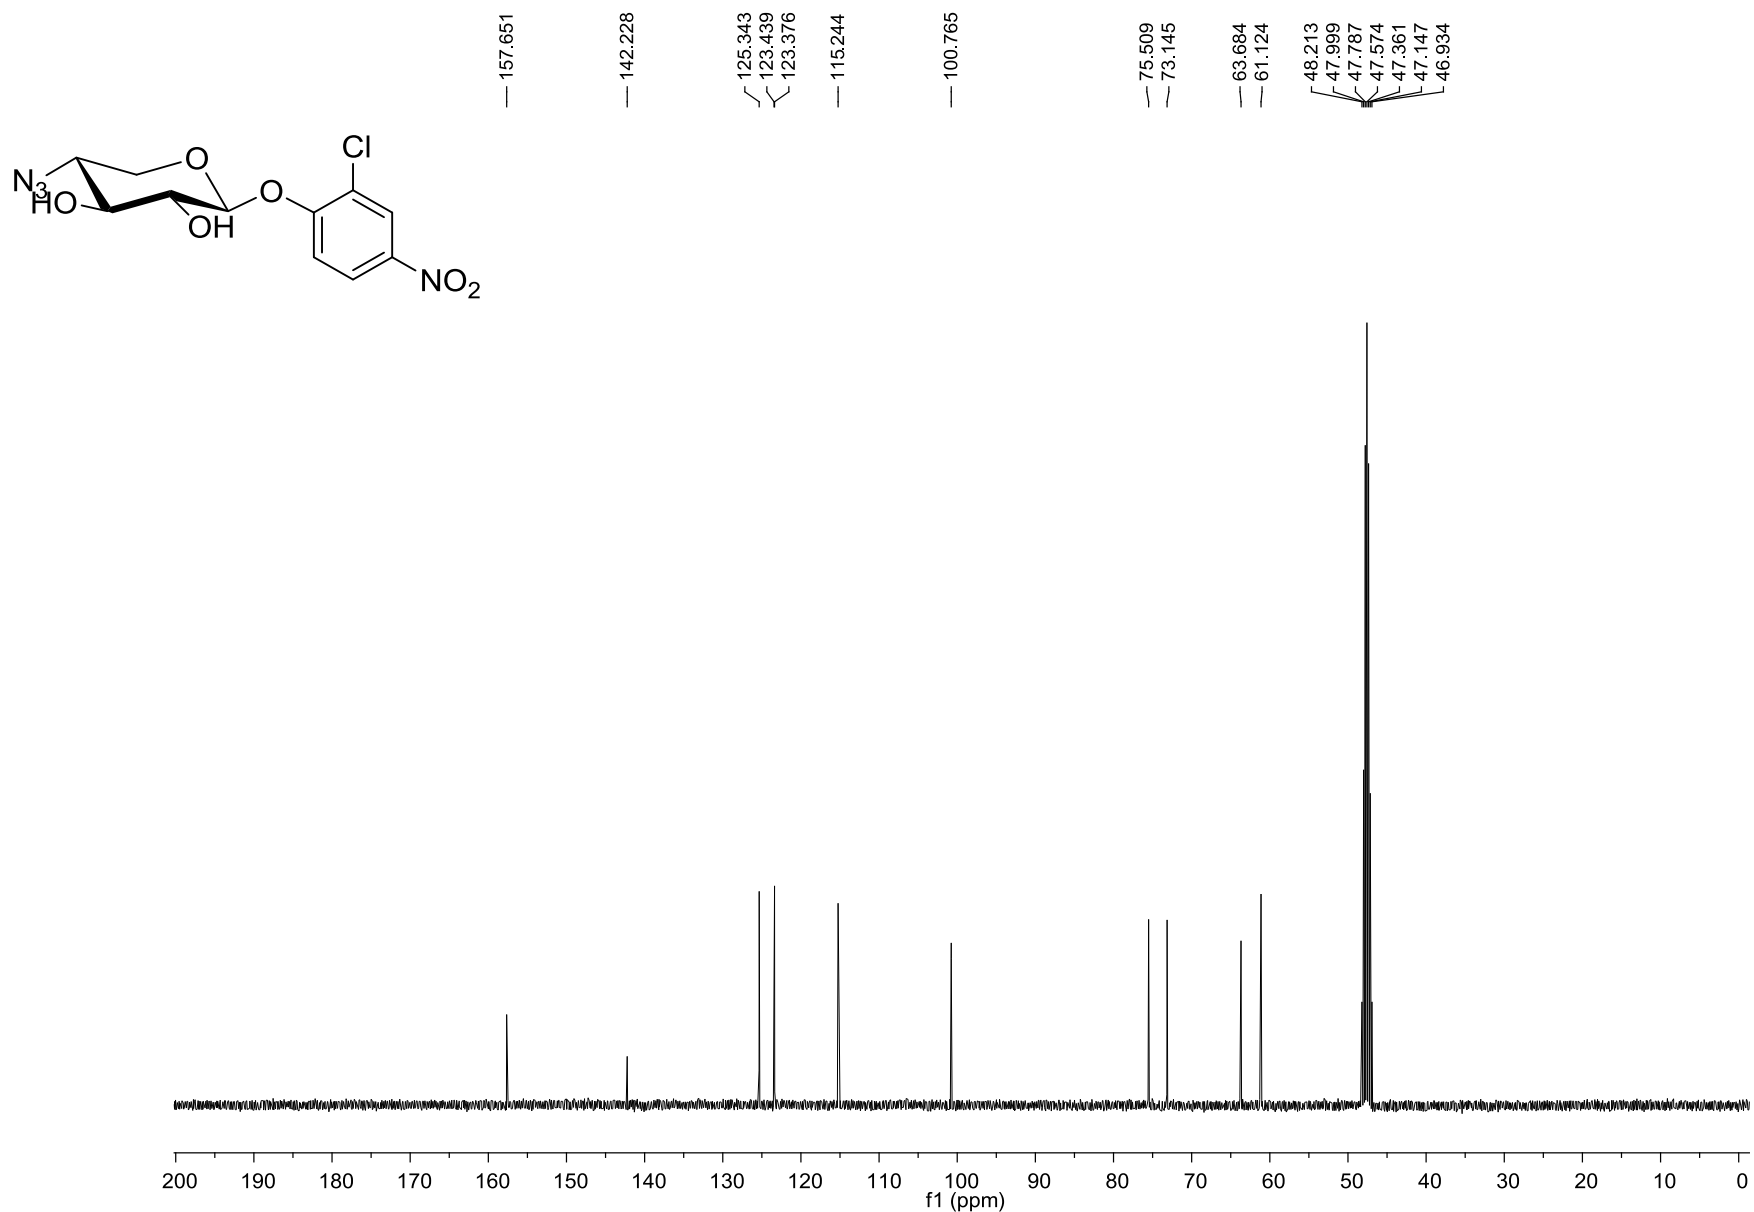

(2-chloro-4-nitrophenyl)-4-deoxy-4-amino-β-D-xylopyranoside (**13**): <sup>1</sup>H NMR (CD<sub>3</sub>OD, 400 MHz)

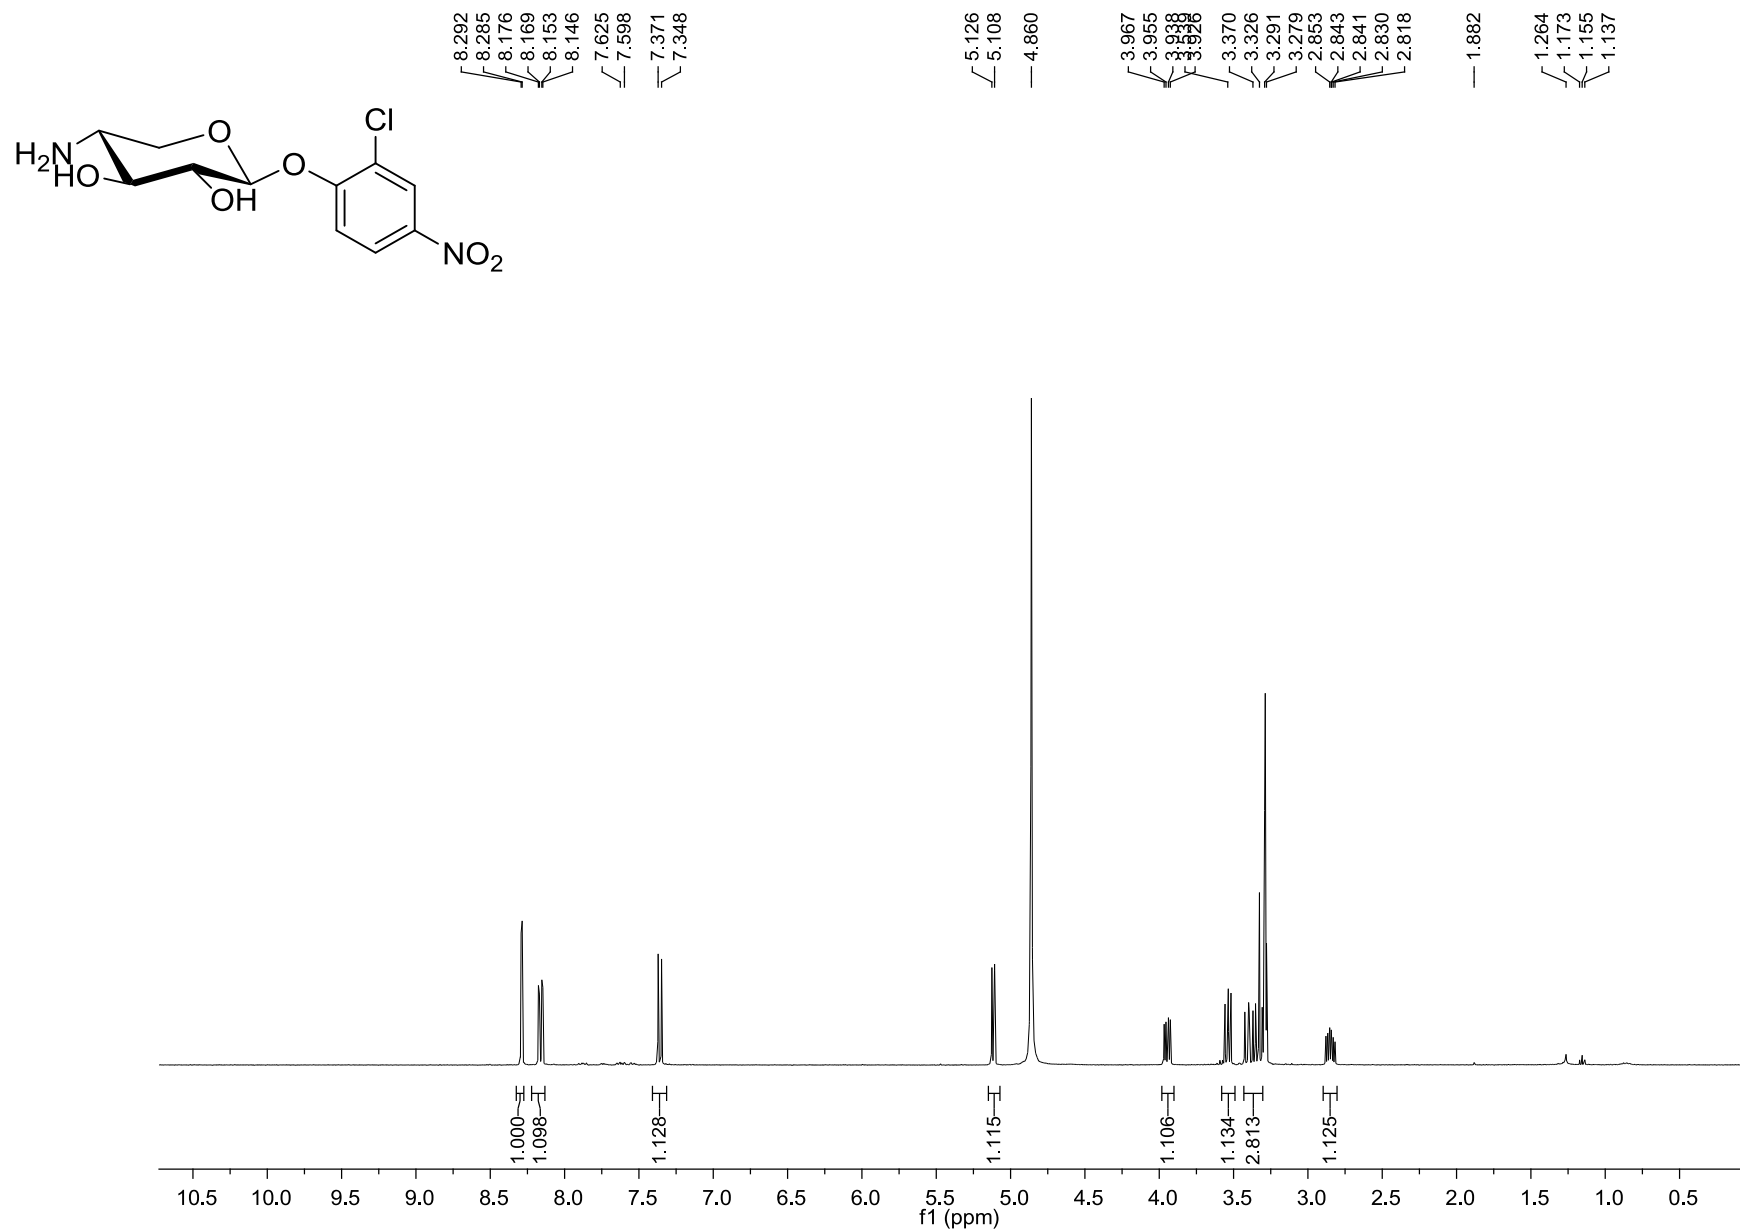

(2-chloro-4-nitrophenyl)-4-deoxy-4-amino- $\beta$ -D-xylopyranoside (**13**):  $^{13}\text{C}$  NMR ( $\text{CD}_3\text{OD}$ , 400 MHz)

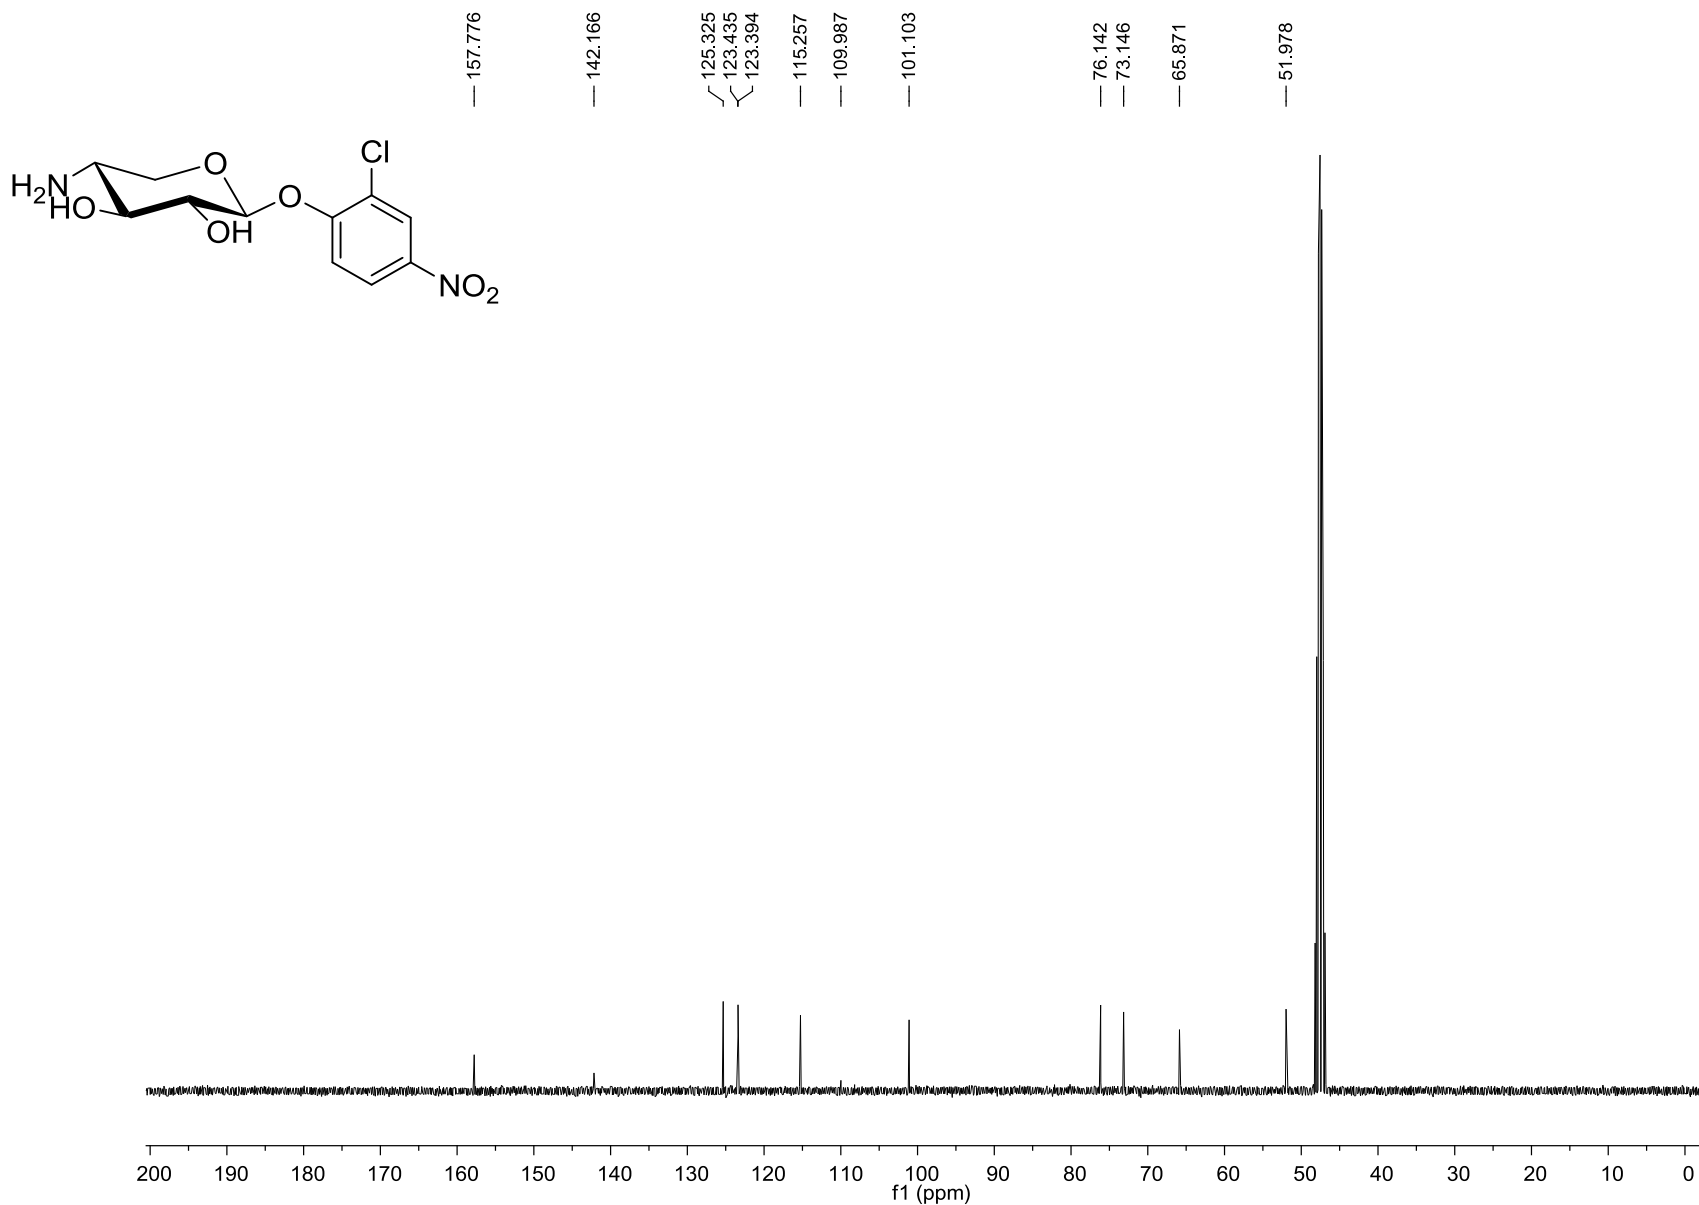

(2-chloro-4-nitrophenyl)-4-deoxy-4-amino-β-D-xylopyranoside hydrochloride (**13a**): <sup>1</sup>H NMR (D<sub>2</sub>O, 400 MHz)

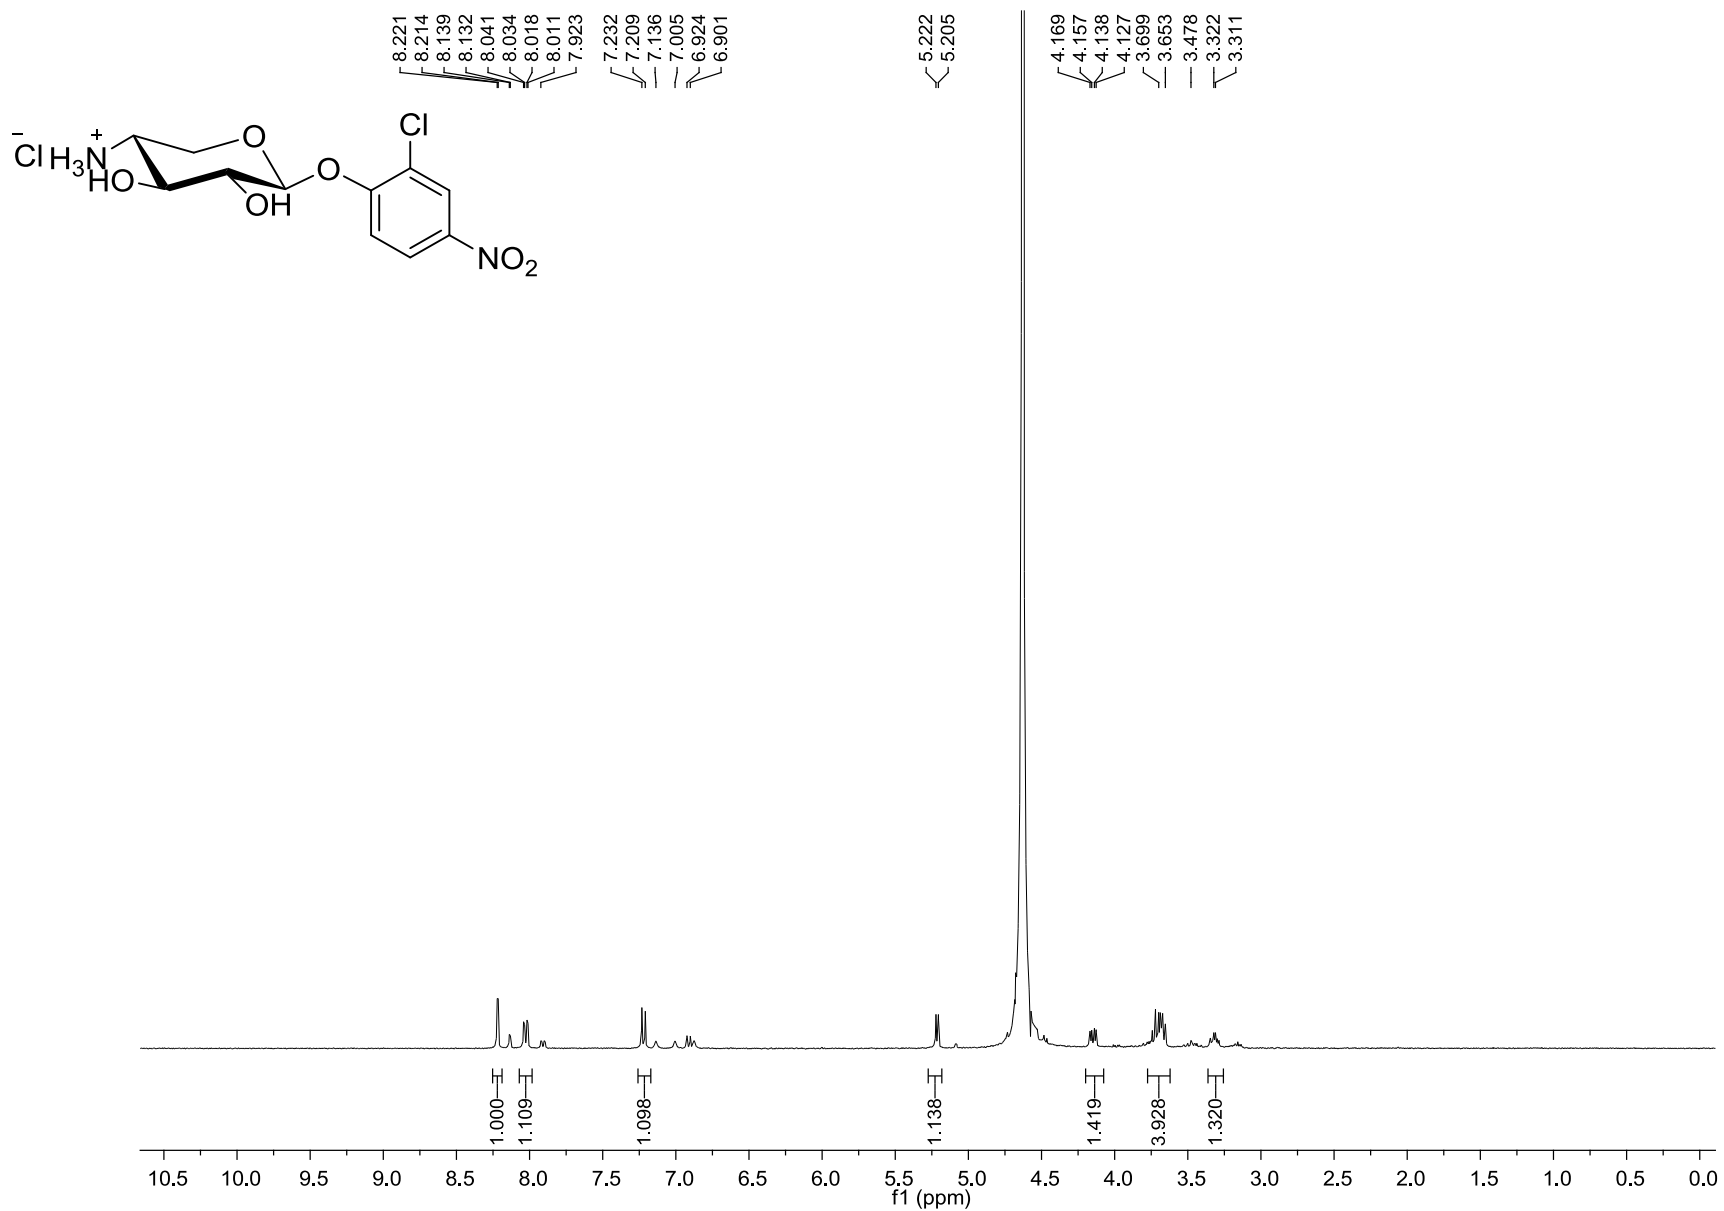

(2-chloro-4-nitrophenyl)-4-deoxy-4-amino- $\beta$ -D-xylopyranoside hydrochloride (**13a**):  $^{13}\text{C}$  NMR ( $\text{D}_2\text{O}$ , 100 MHz)

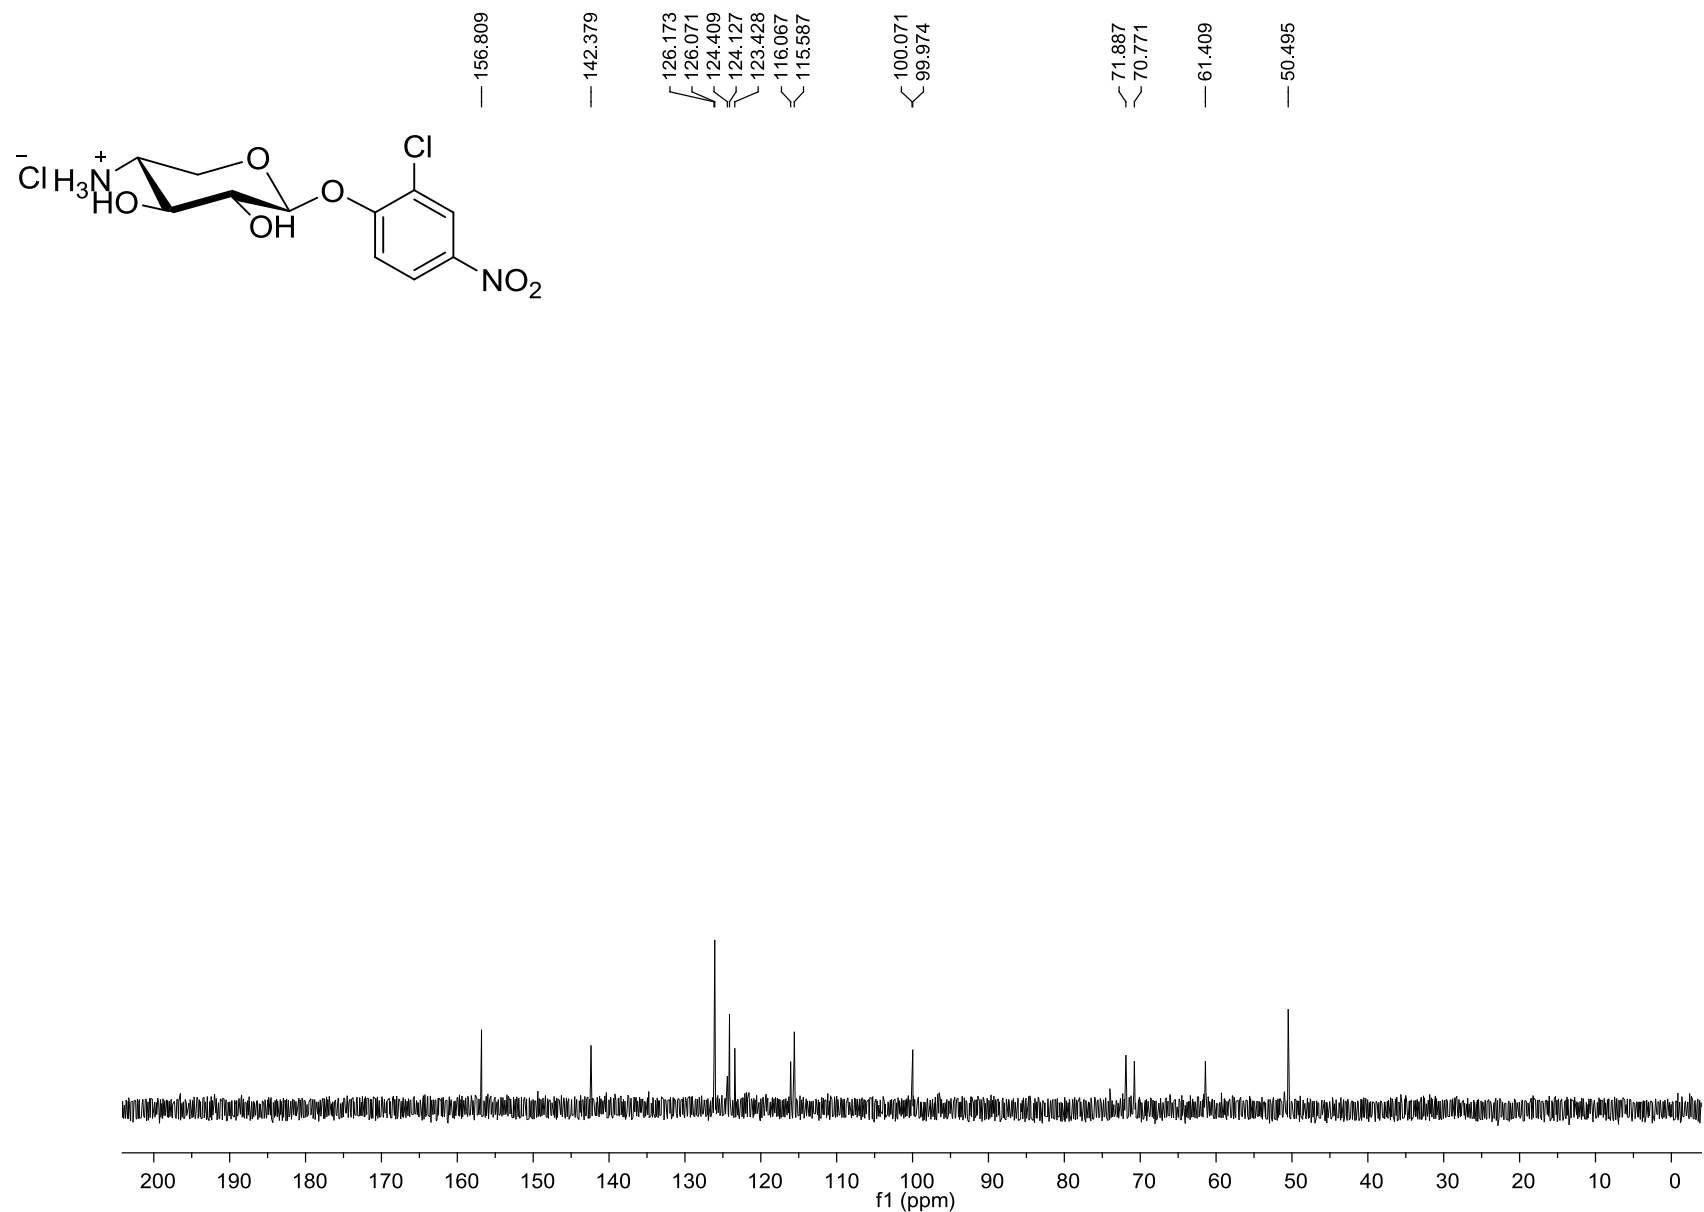

(2-chloro-4-nitrophenyl)-4-deoxy-4-azido- $\beta$ -L-xylopyranoside (**14**):  $^1\text{H}$  NMR ( $\text{CD}_3\text{OD}$ , 400 MHz)

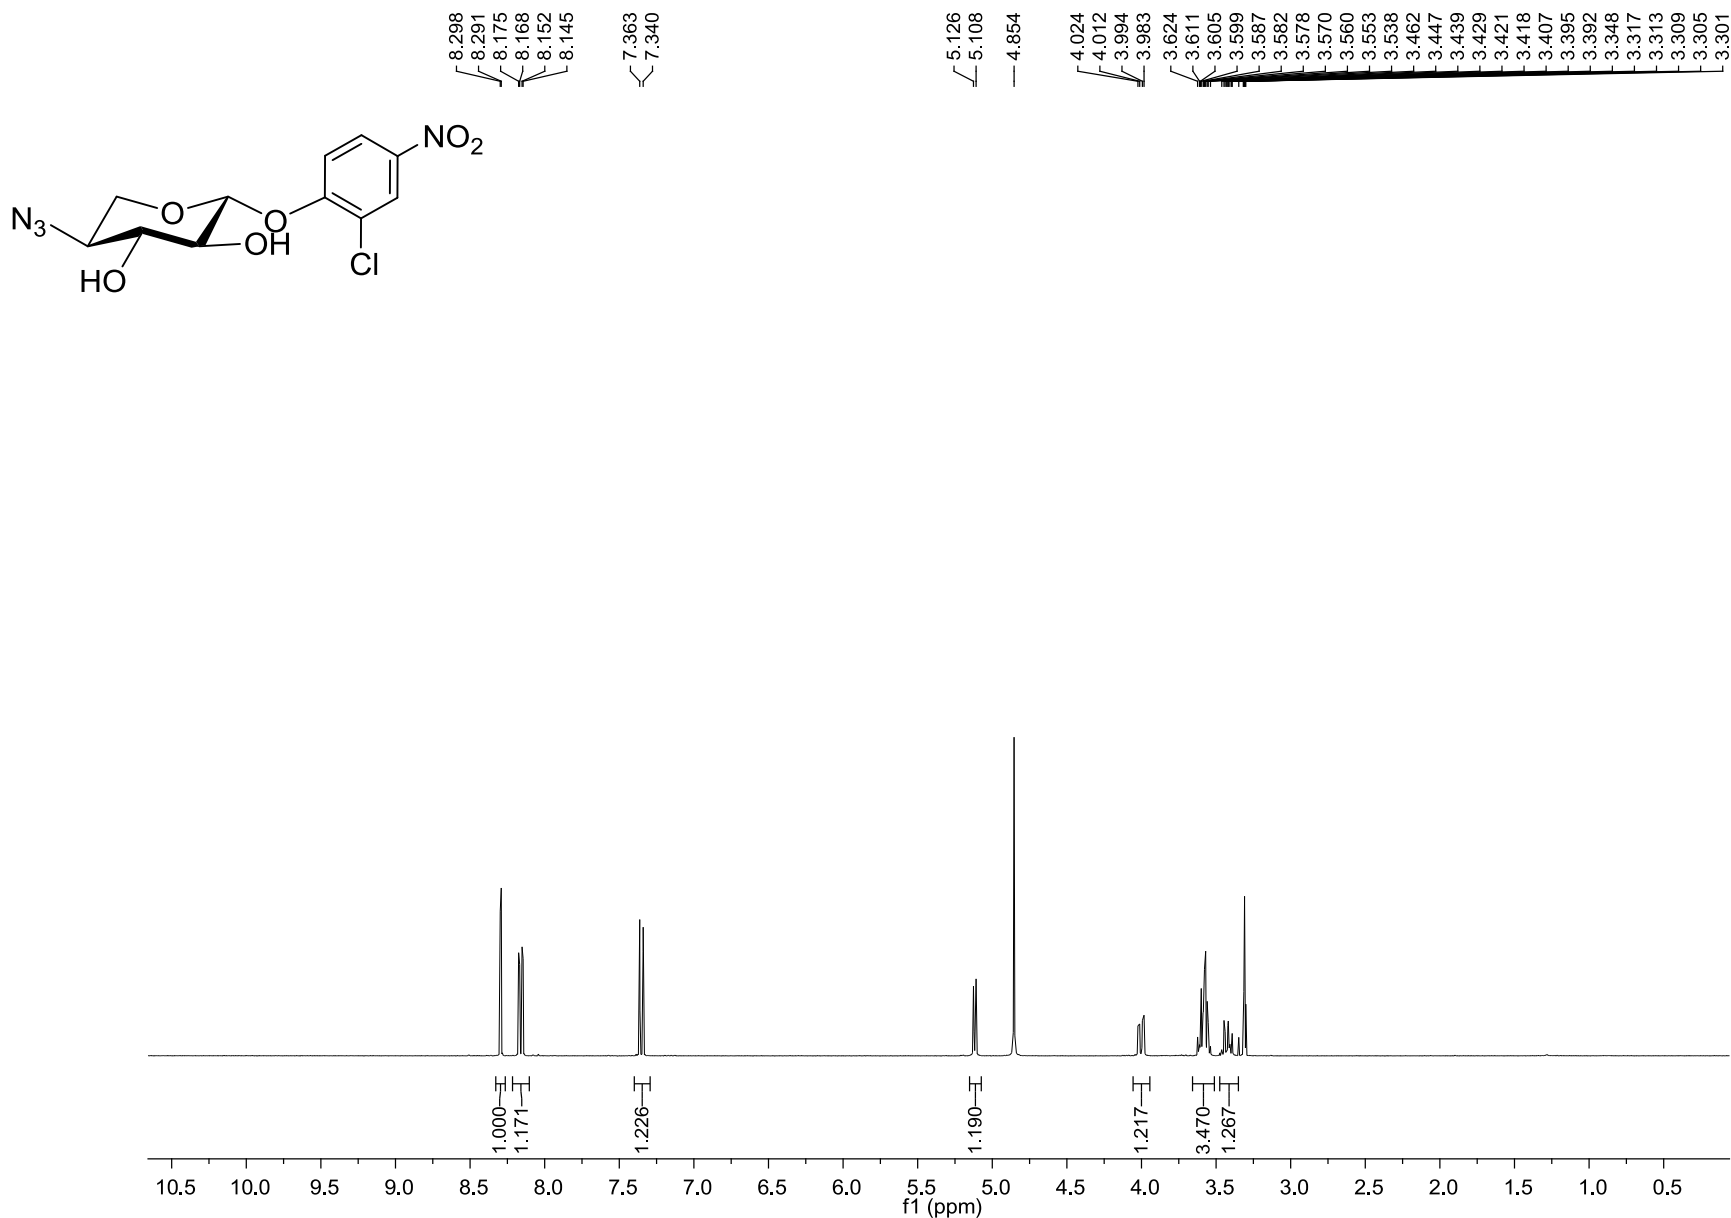



(2-chloro-4-nitrophenyl)-4-deoxy-4-azido- $\beta$ -L-xylopyranoside (**14**): gCOSY NMR ( $\text{CD}_3\text{OD}$ , 400 MHz)

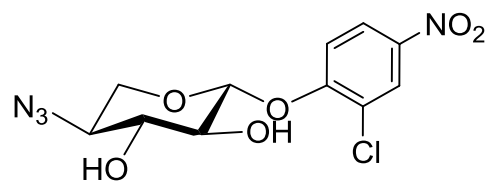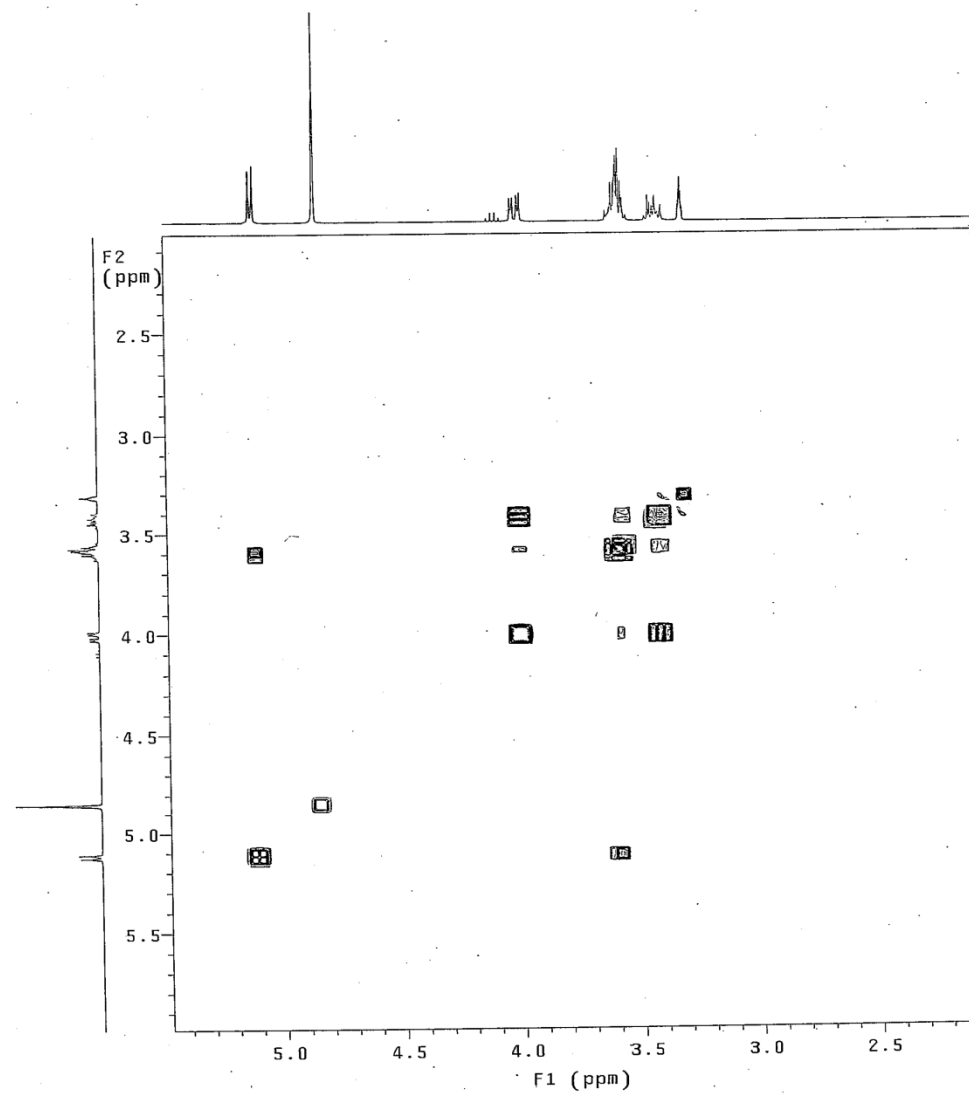

S77

(2-chloro-4-nitrophenyl)-4-deoxy-4-azido- $\beta$ -L-xylopyranoside (**14**):  $^{13}\text{C}$  NMR ( $\text{CD}_3\text{OD}$ , 400 MHz)

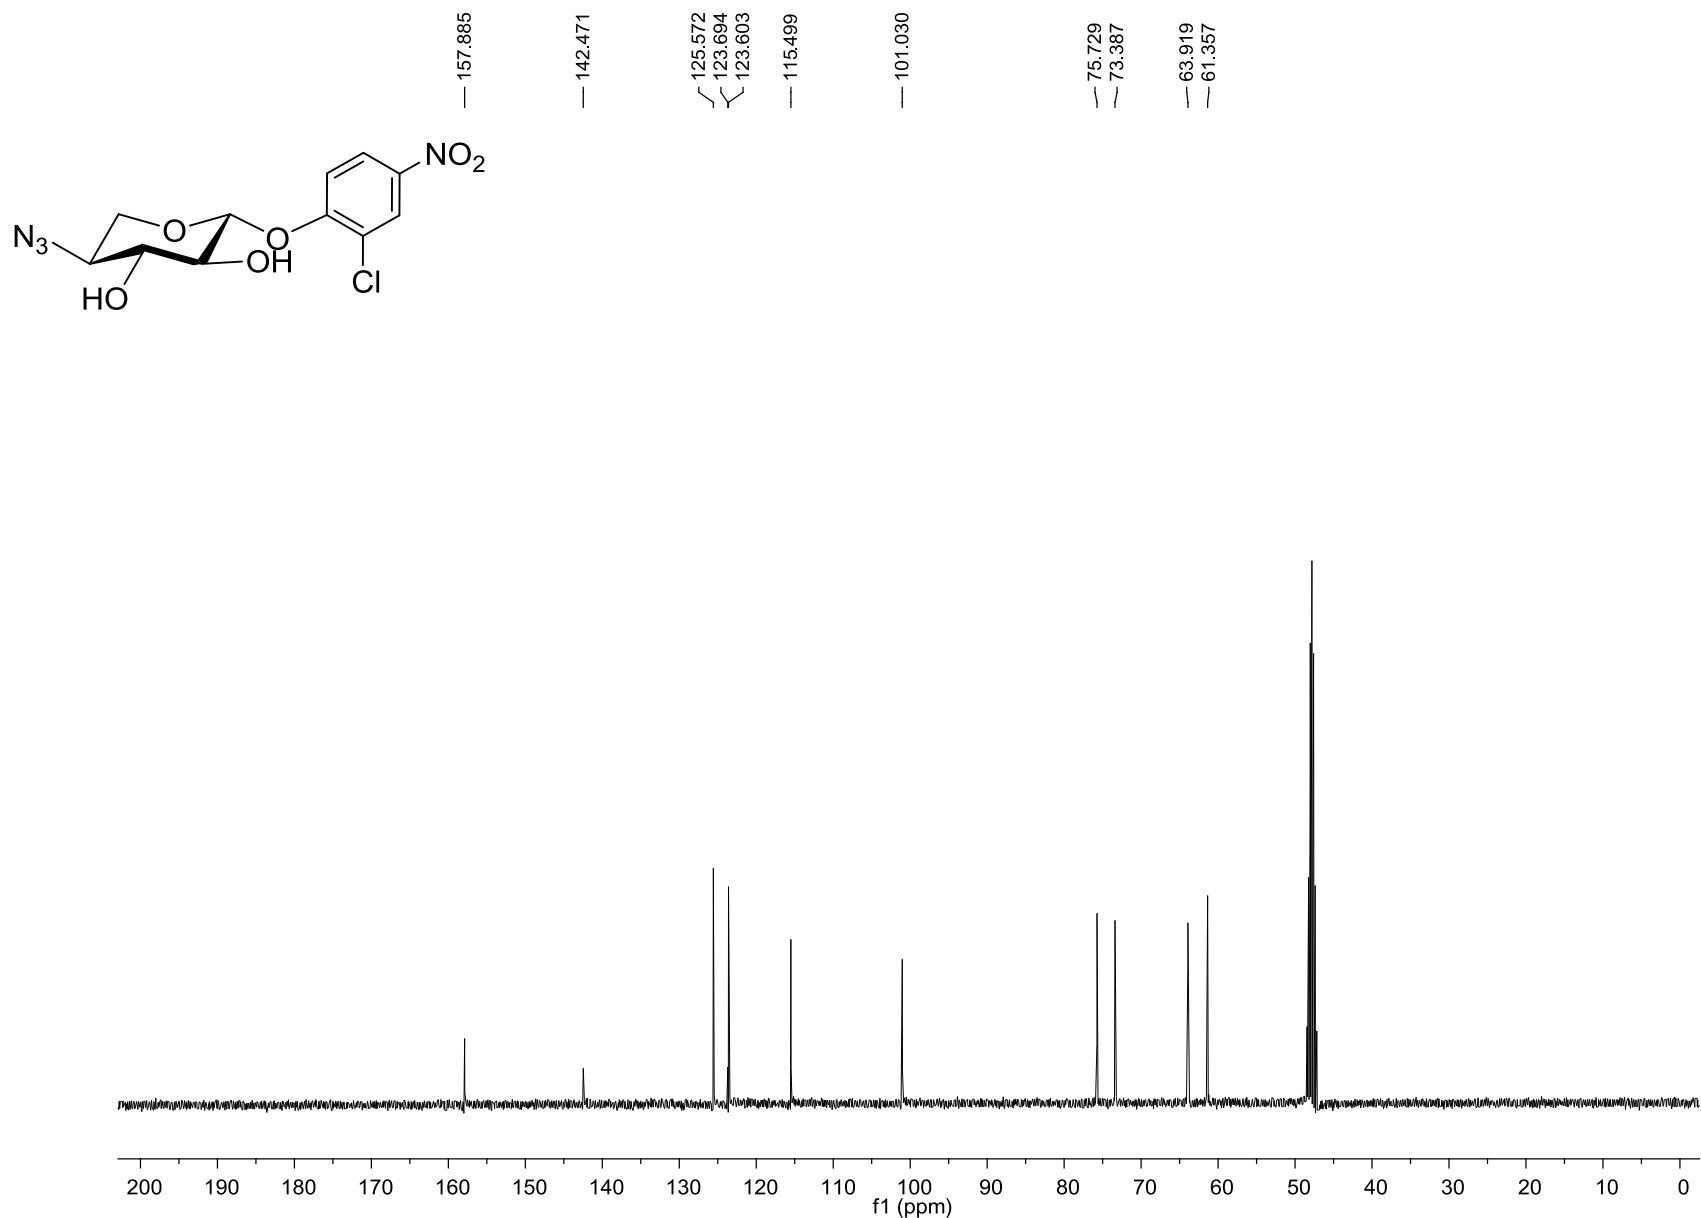

(2-chloro-4-nitrophenyl)-4-deoxy-4-amino-β-L-xylopyranoside (**15**): <sup>1</sup>H NMR (CD<sub>3</sub>OD, 500 MHz)

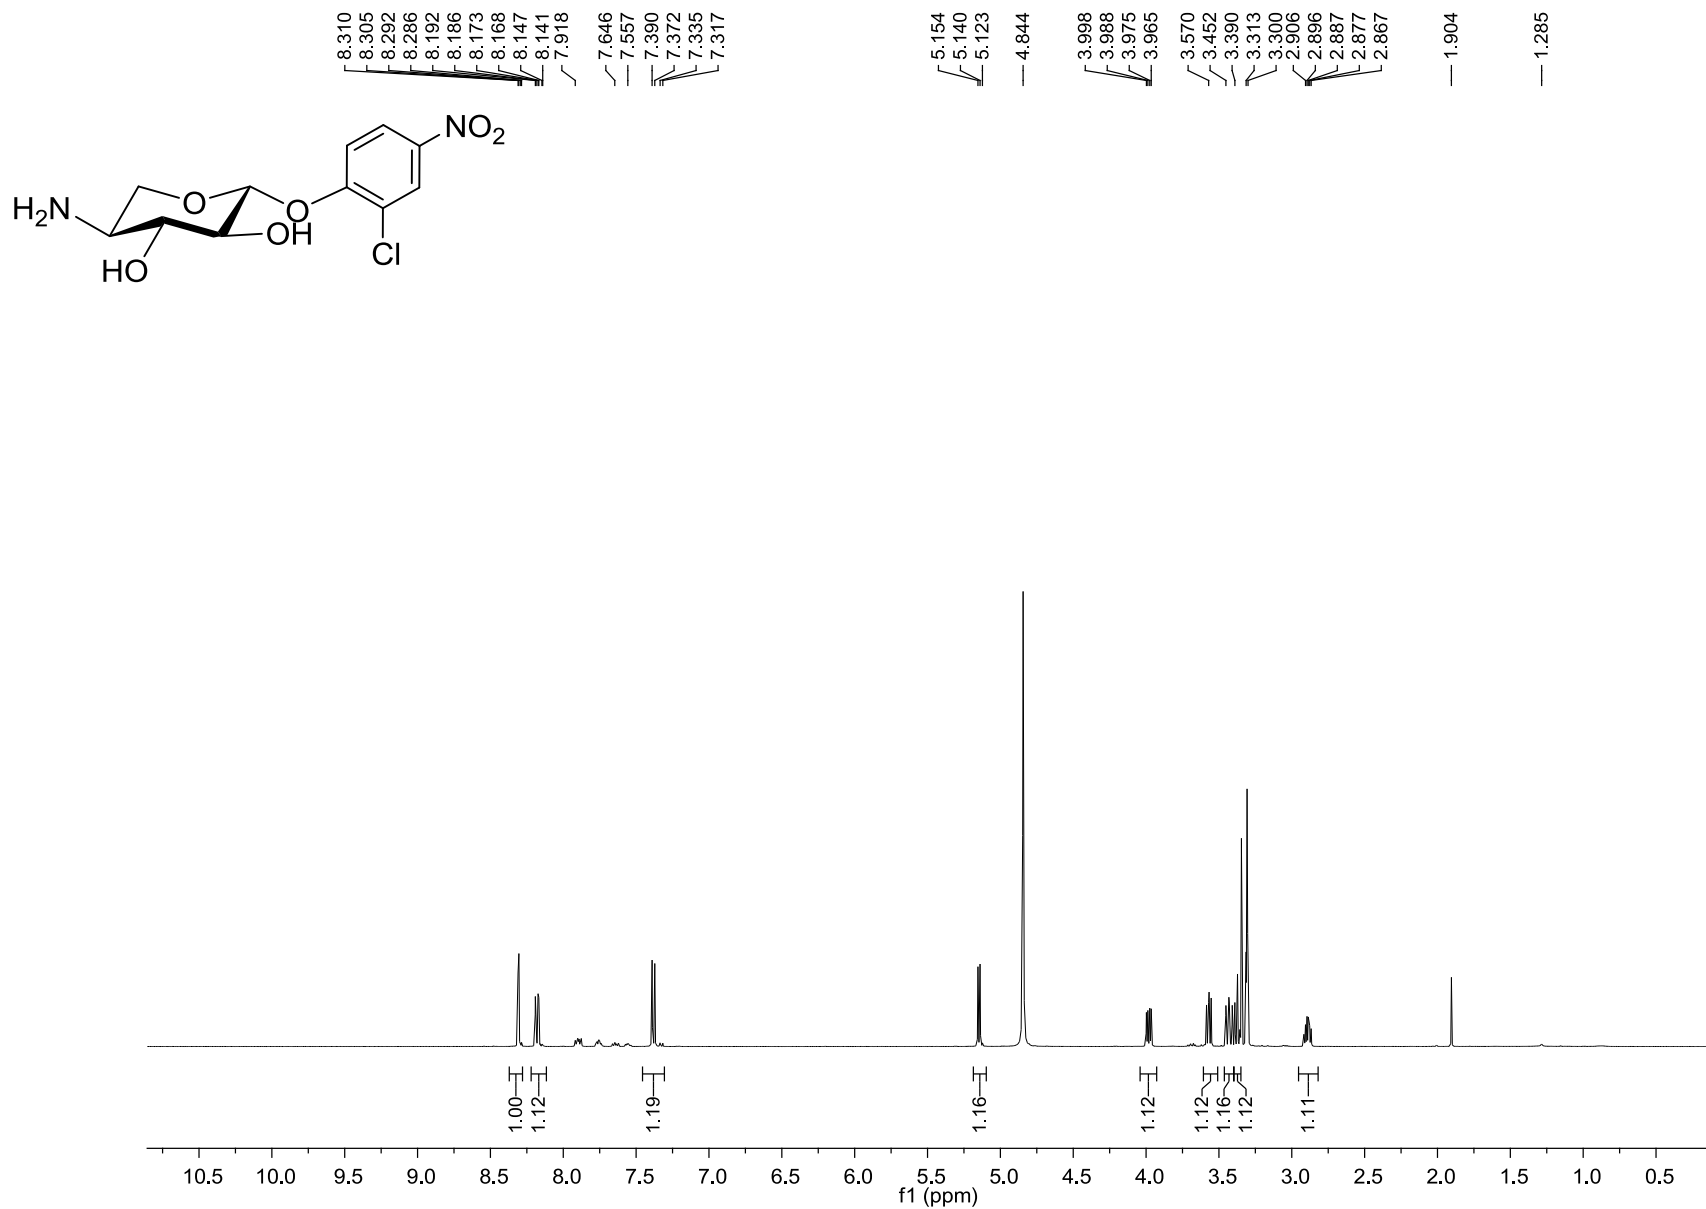

(2-chloro-4-nitrophenyl)-4-deoxy-4-amino- $\beta$ -L-xylopyranoside (**15**): gCOSY NMR ( $\text{CD}_3\text{OD}$ , 500 MHz)

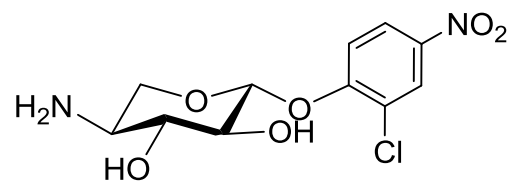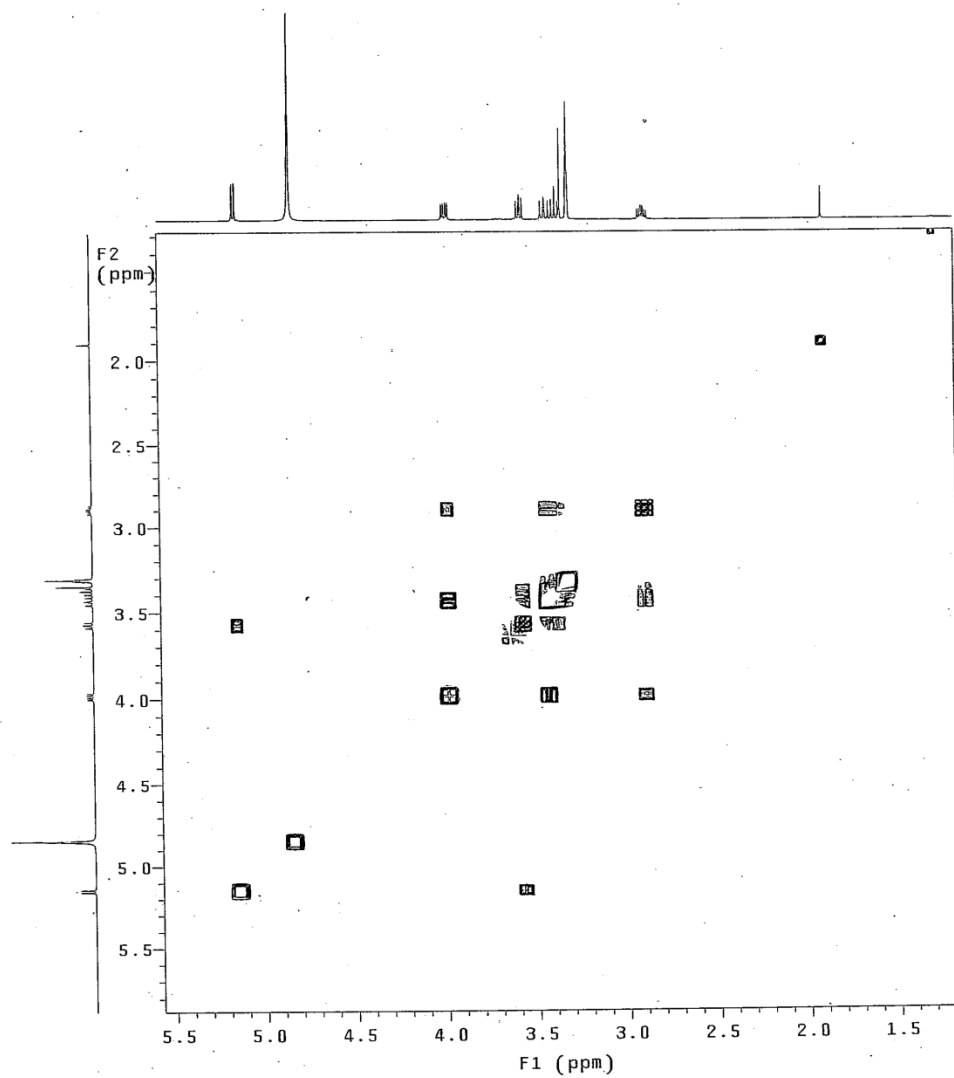

(2-chloro-4-nitrophenyl)-4-deoxy-4-amino-β-L-xylopyranoside (**15**): <sup>13</sup>C NMR (CD<sub>3</sub>OD, 100 MHz)

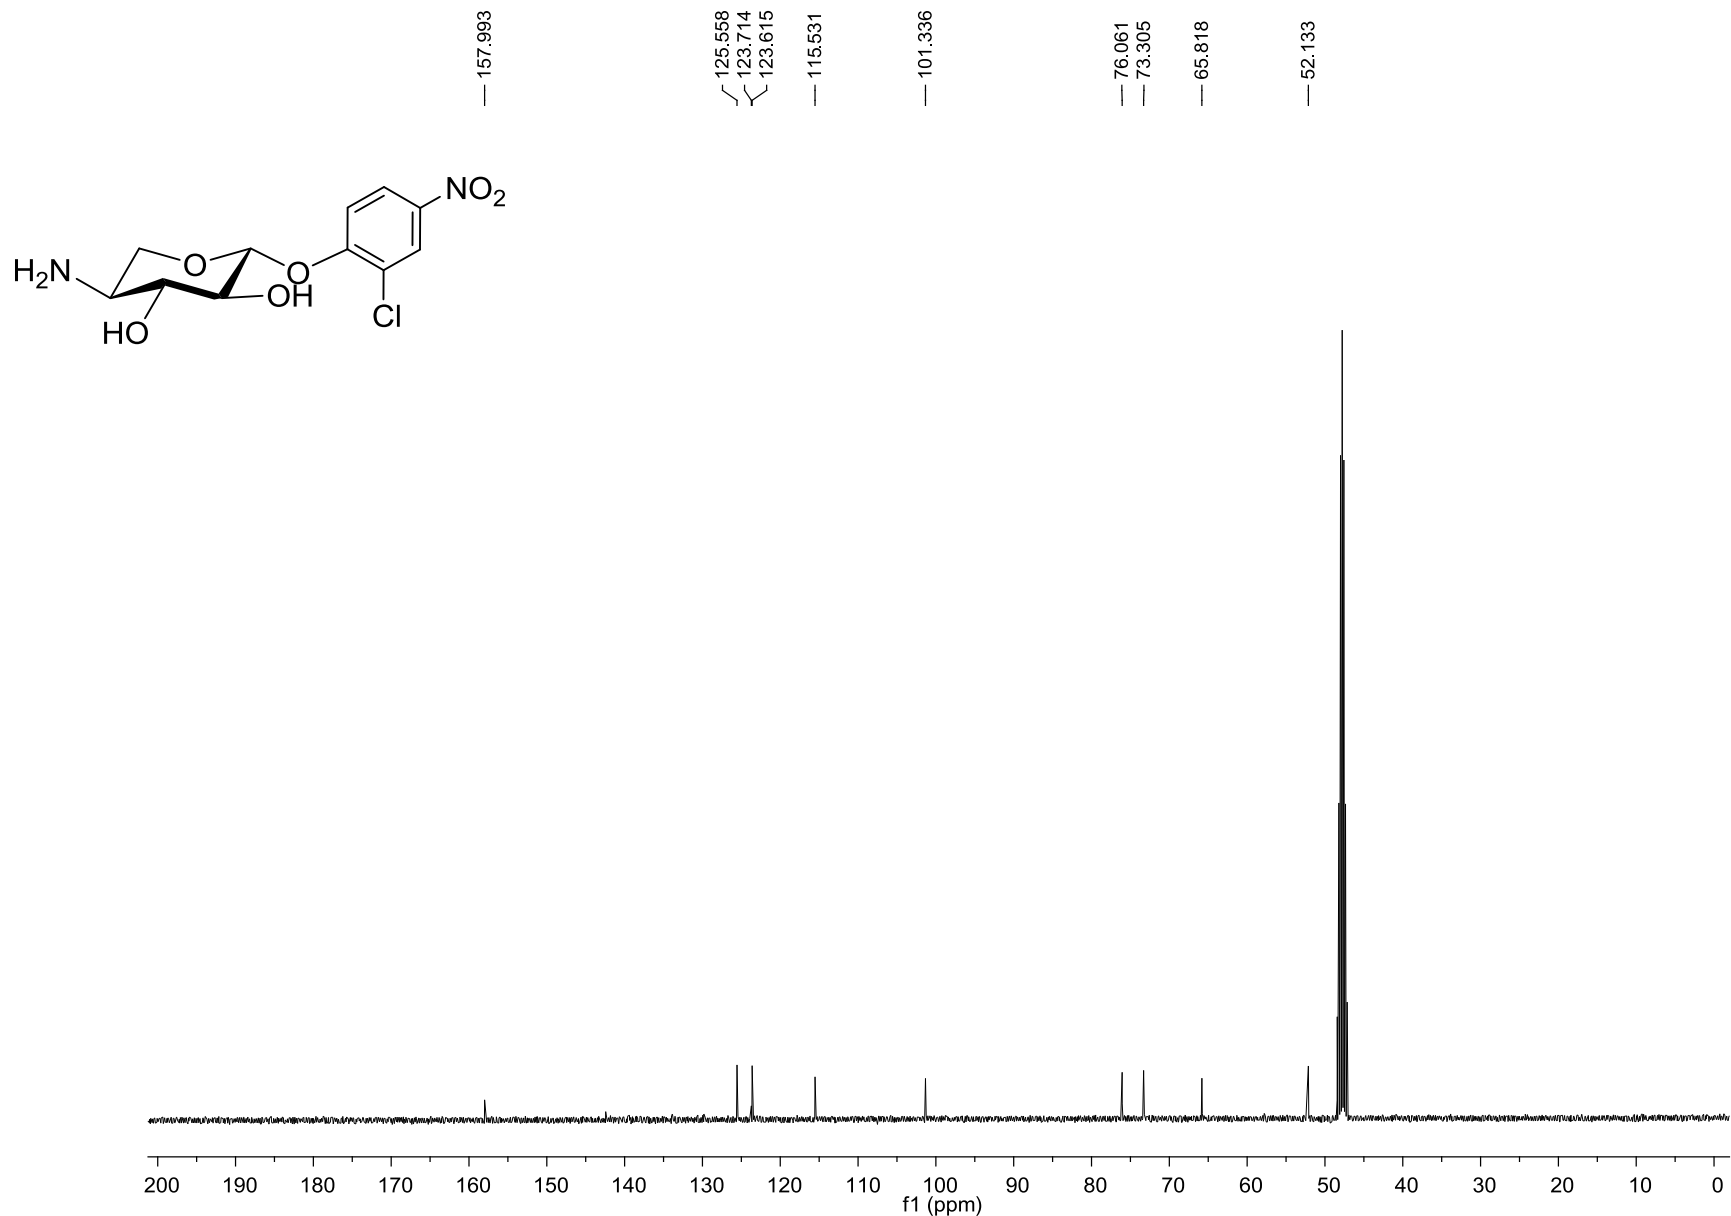

(2-chloro-4-nitrophenyl)-4-deoxy-4-amino- $\beta$ -L-xylopyranoside hydrochloride (**15a**):  $^1\text{H}$  NMR ( $\text{D}_2\text{O}$ , 400 MHz)

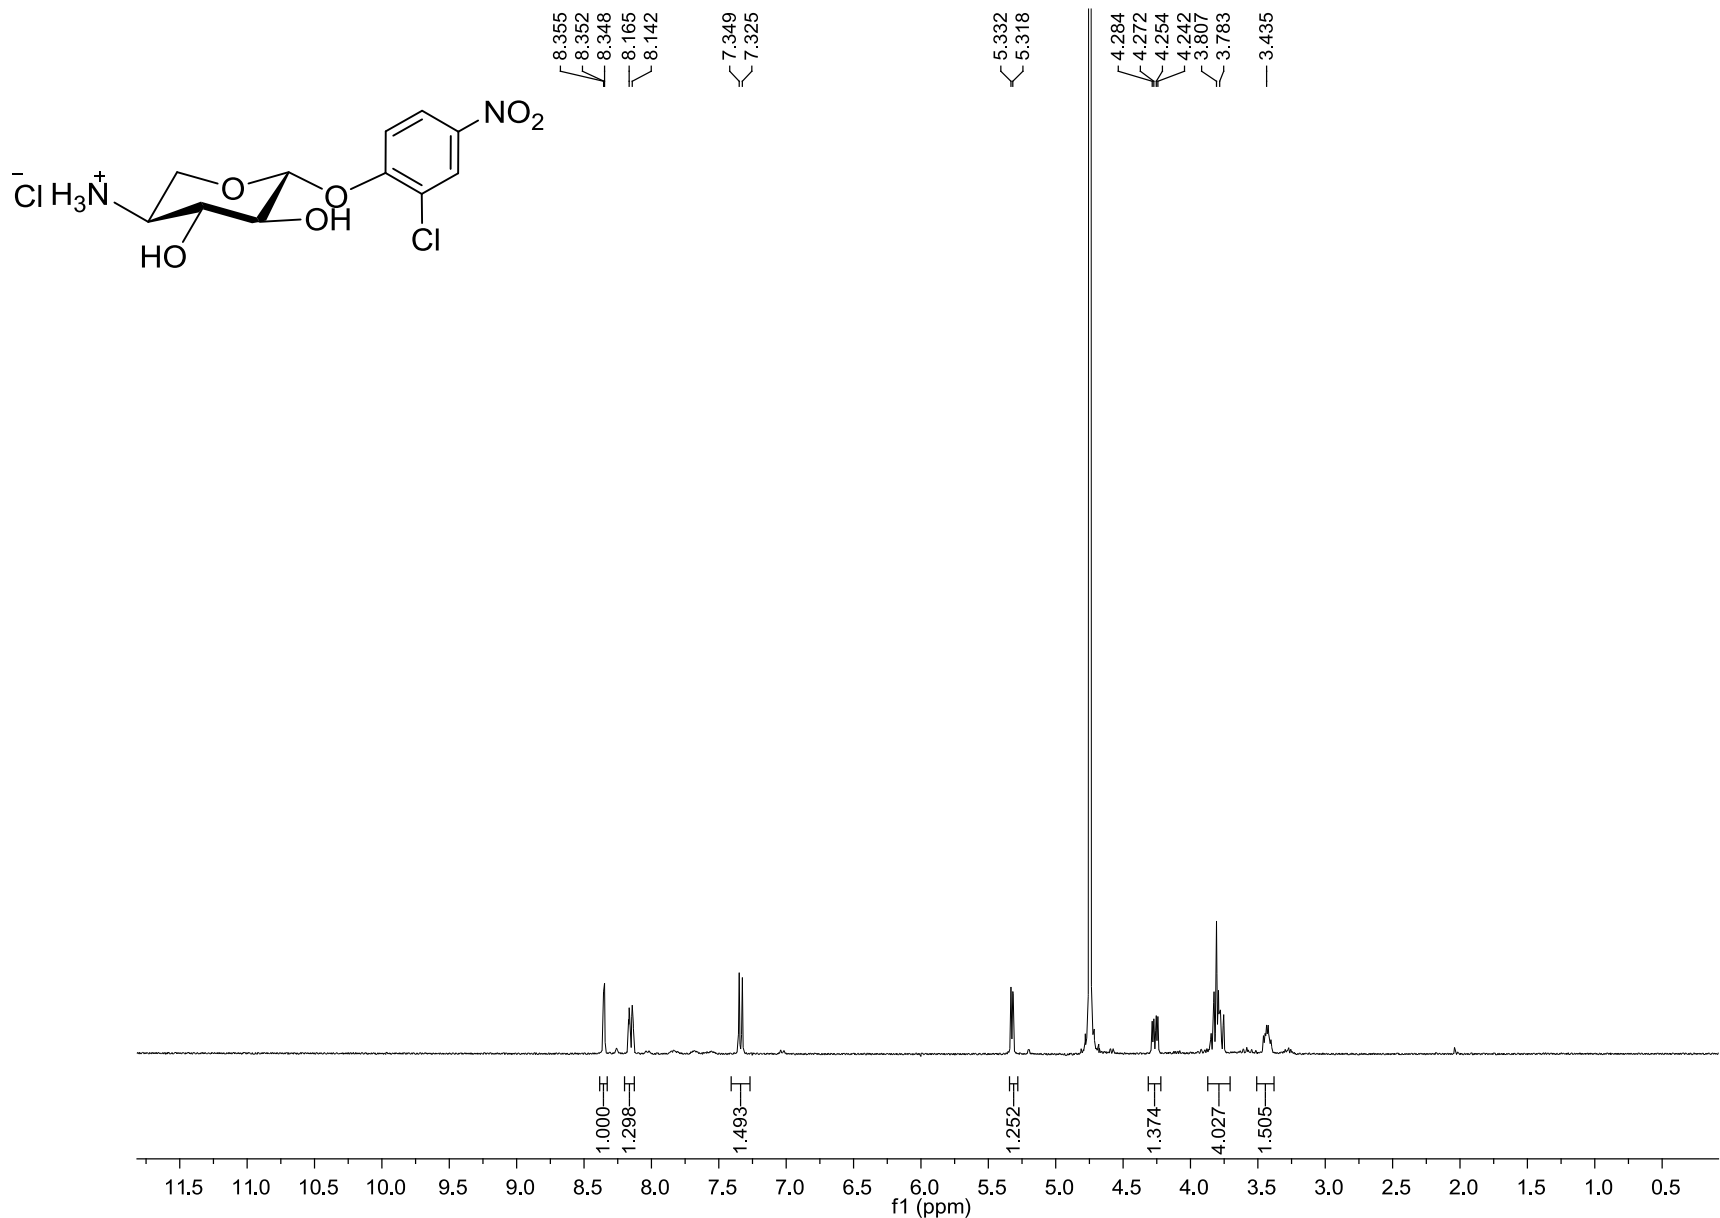

S82

(2-chloro-4-nitrophenyl)-4-deoxy-4-amino- $\beta$ -L-xylopyranoside hydrochloride (**15a**): gCOSY NMR (DMSO-*d*<sub>6</sub>, 500 MHz)

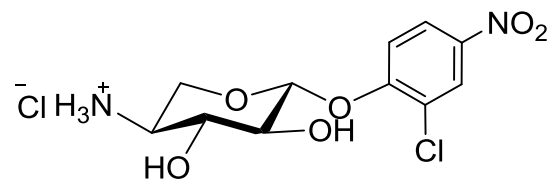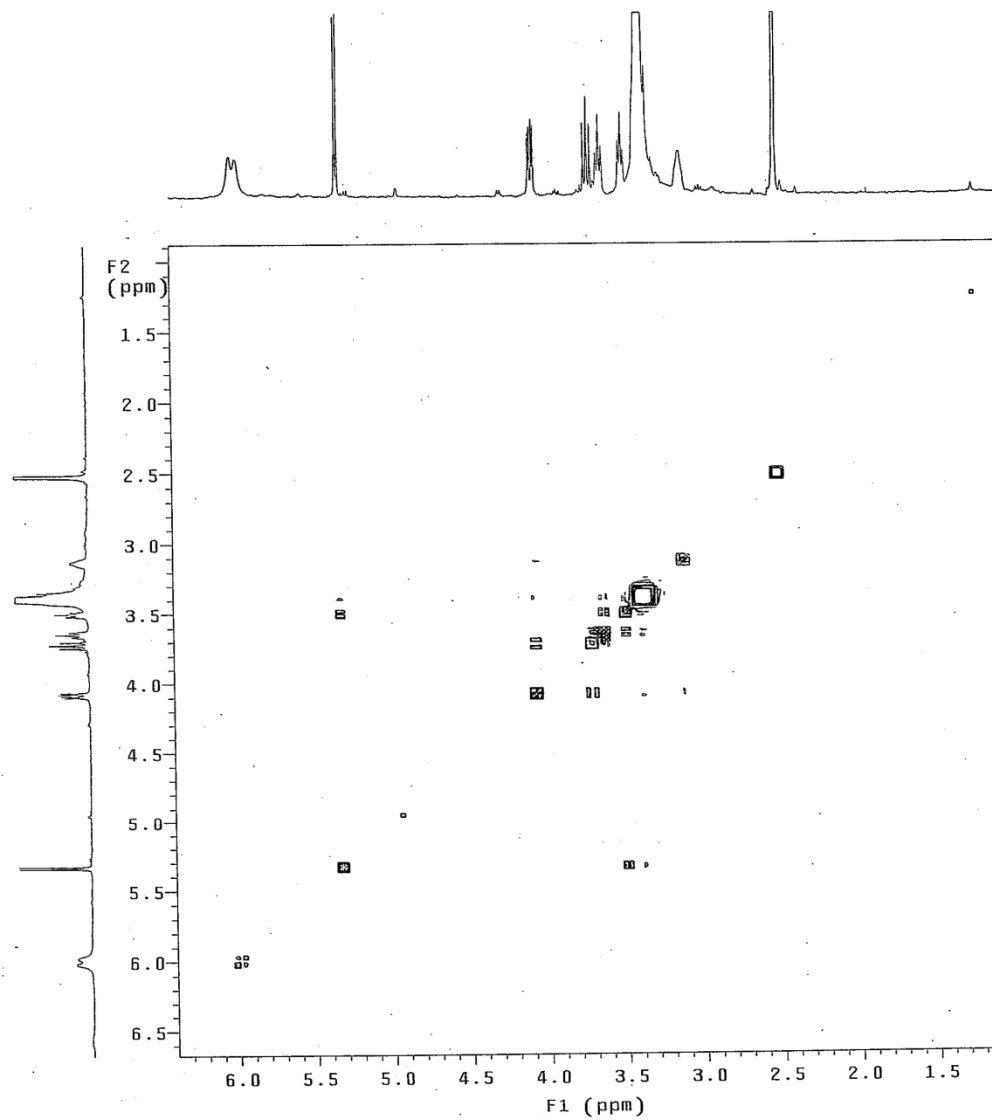

(2-chloro-4-nitrophenyl)-4-deoxy-4-amino-β-L-xylopyranoside hydrochloride (**15a**): <sup>13</sup>C NMR (DMSO-*d*<sub>6</sub>, 500 MHz)

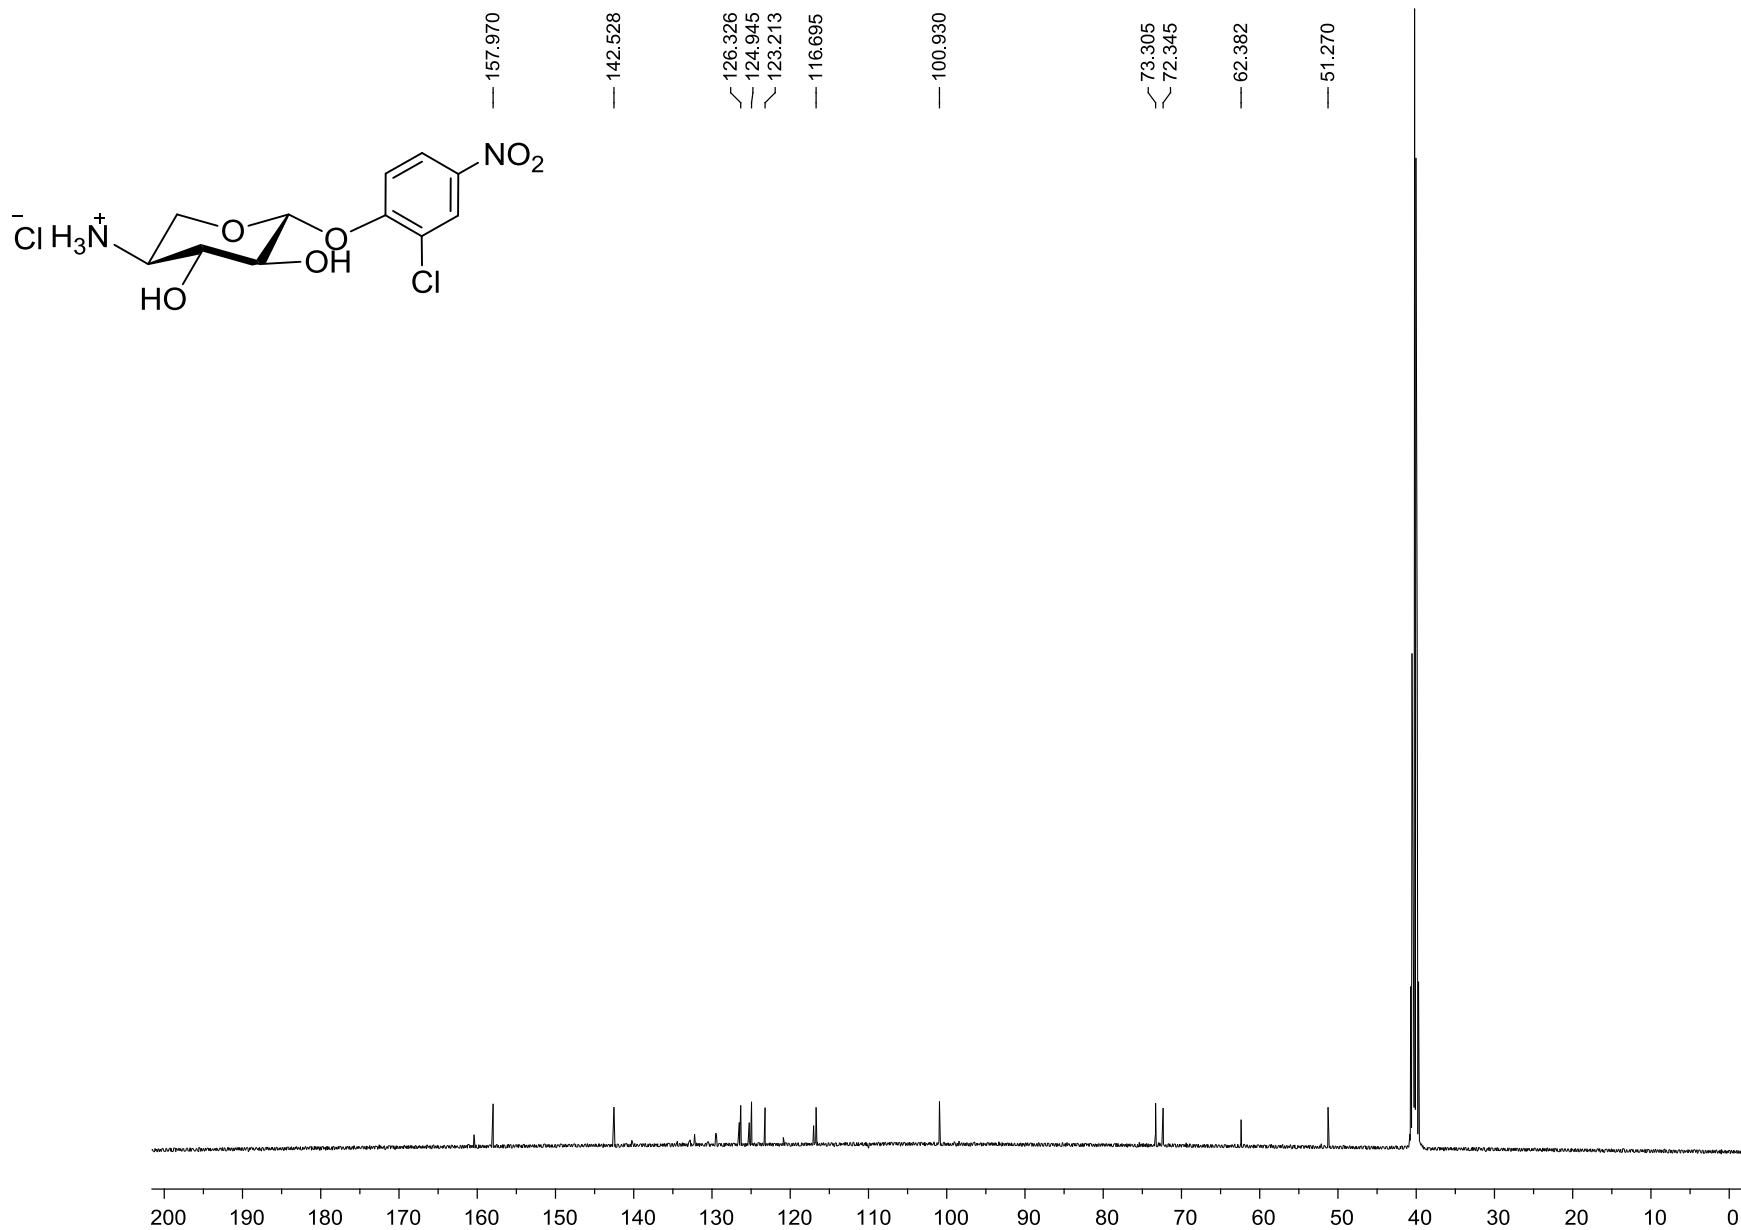



(2-chloro-4-nitrophenyl)-3-deoxy-3-azido-β-D-xylopyranoside (**16**): <sup>1</sup>H NMR (CD<sub>3</sub>OD, 500 MHz)

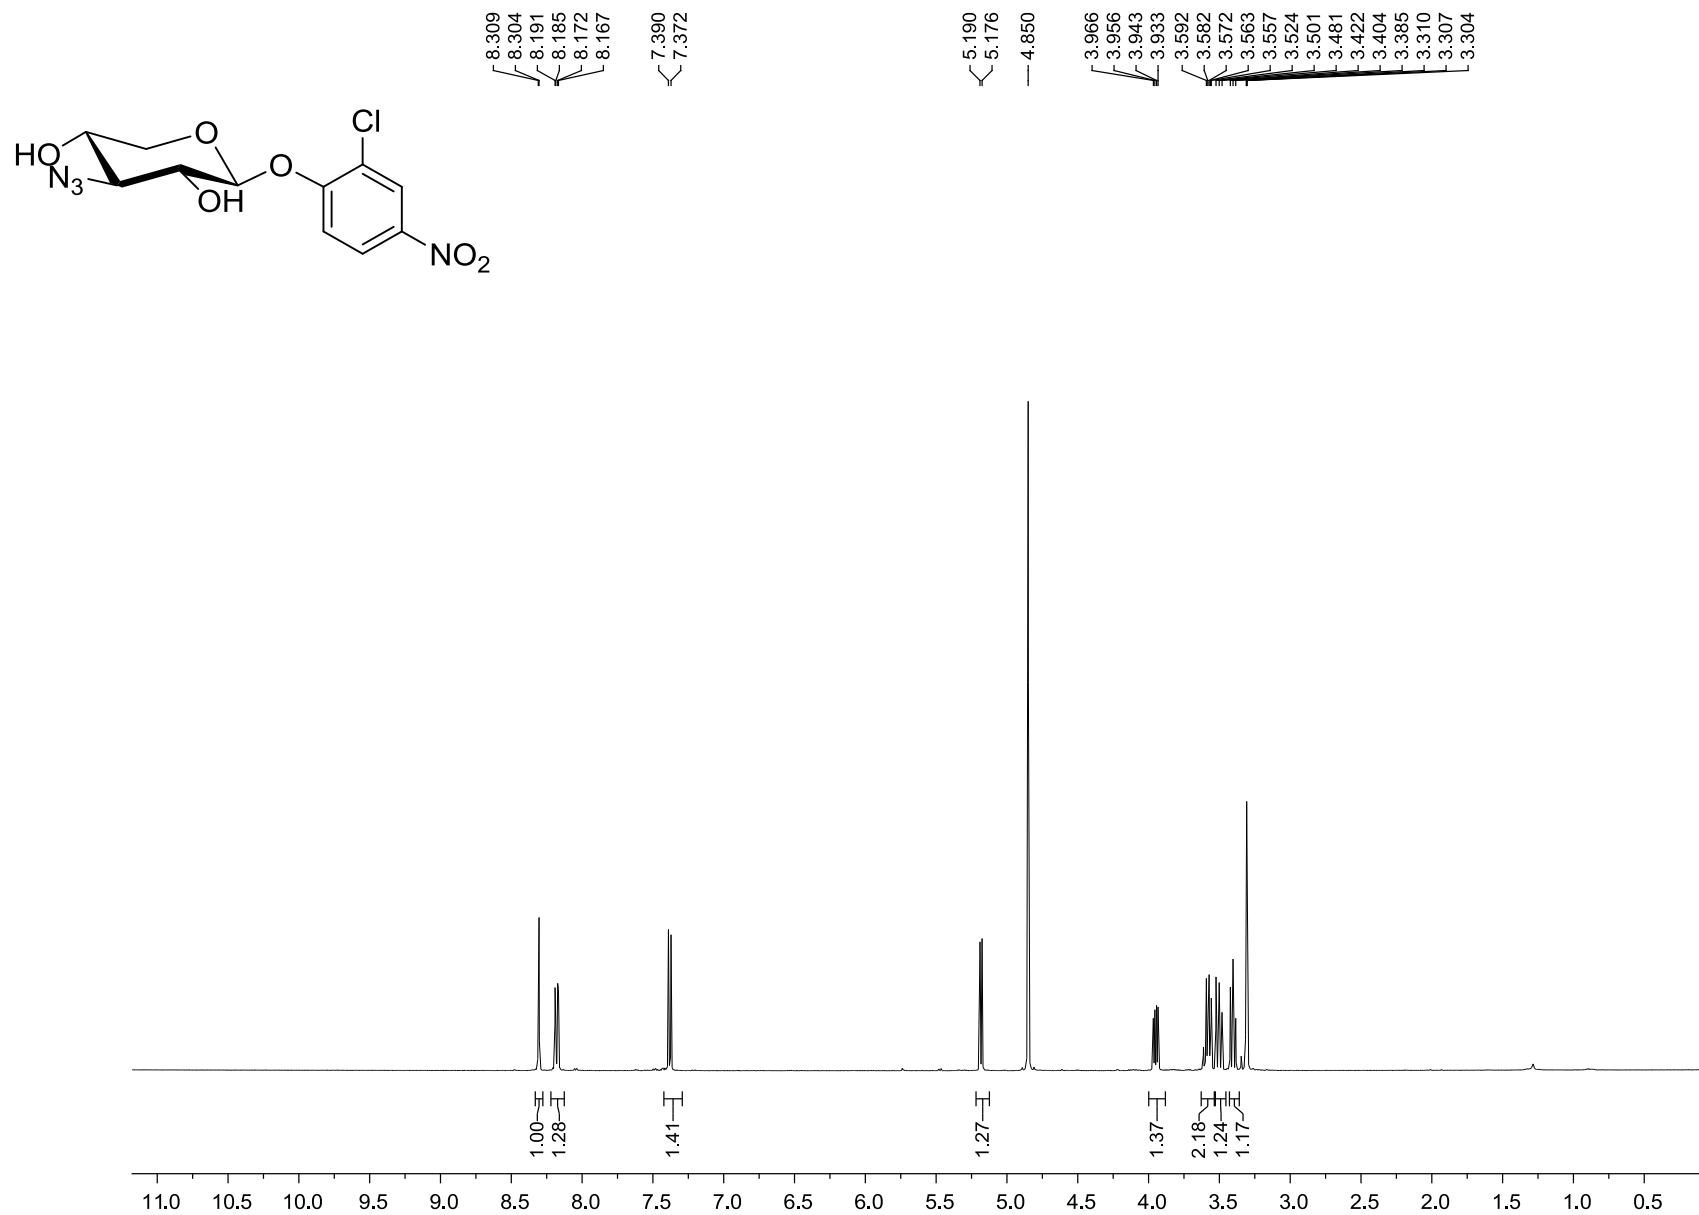

(2-chloro-4-nitrophenyl)-3-deoxy-3-azido- $\beta$ -D-xylopyranoside (**16**): gCOSY NMR ( $\text{CD}_3\text{OD}$ , 500 MHz)

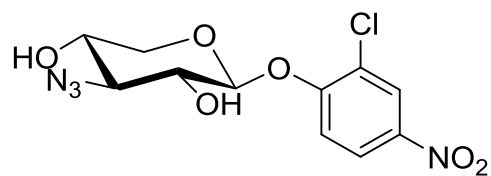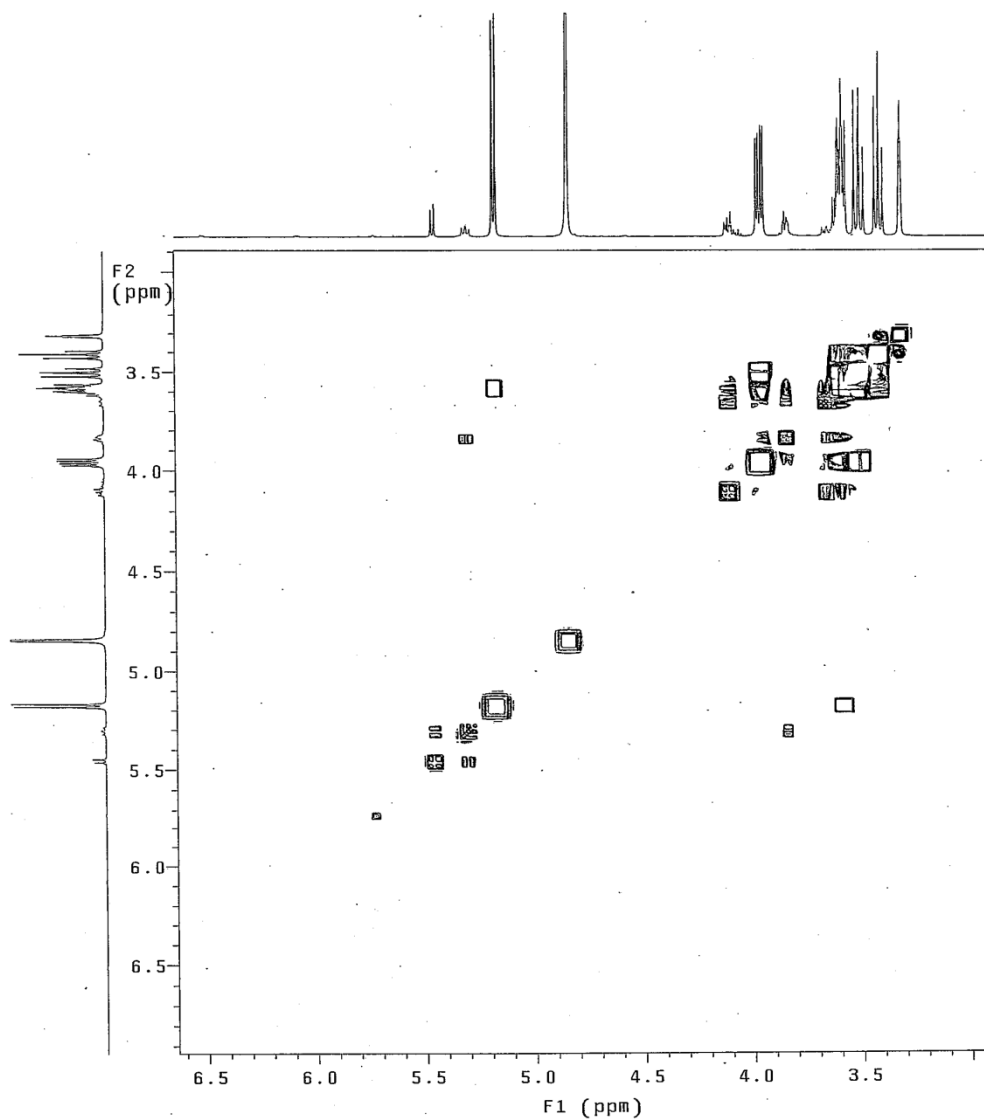

(2-chloro-4-nitrophenyl)-3-deoxy-3-azido- $\beta$ -D-xylopyranoside (**16**):  $^{13}\text{C}$  NMR ( $\text{CD}_3\text{OD}$ , 125 MHz)

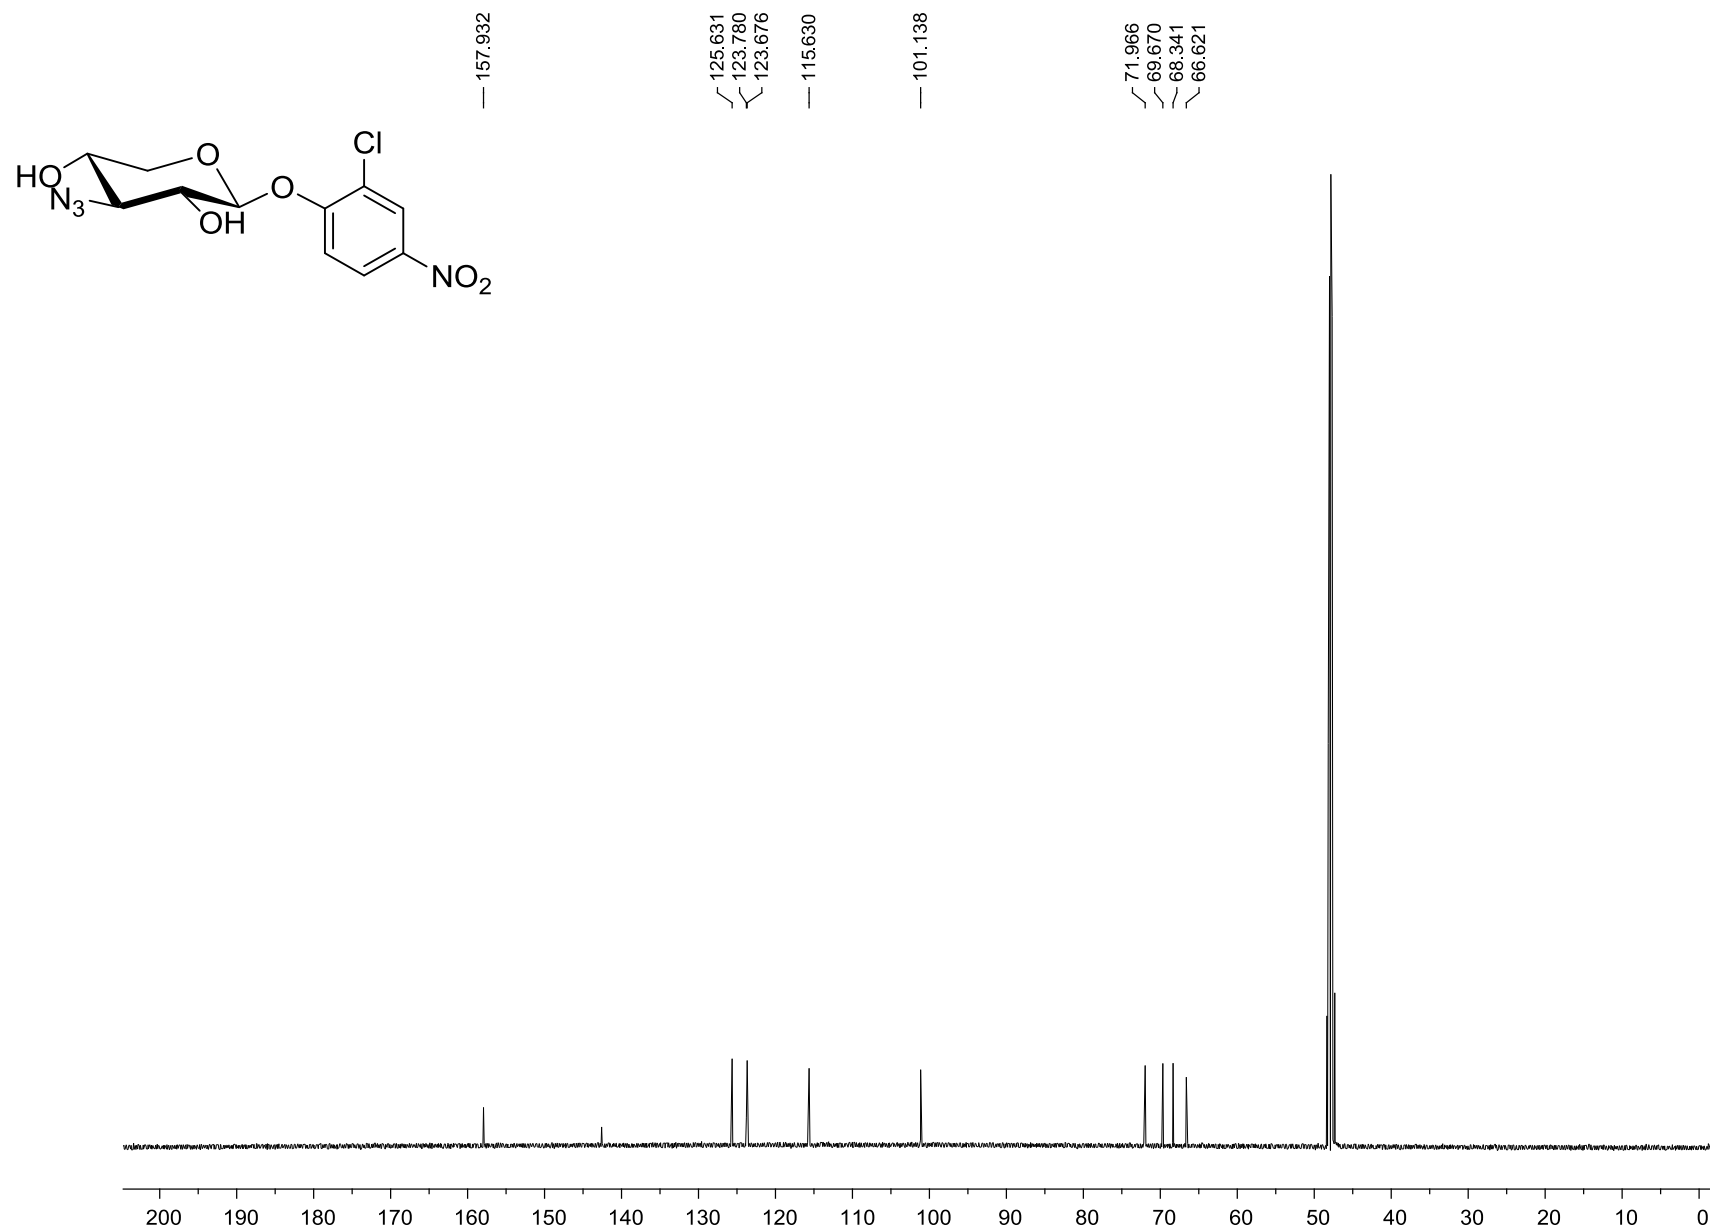

S87

(2-chloro-4-nitrophenyl)-3-deoxy-3-amino- $\beta$ -D-xylopyranoside (**17**):  $^1\text{H}$  NMR ( $\text{CD}_3\text{OD}$ , 500 MHz)

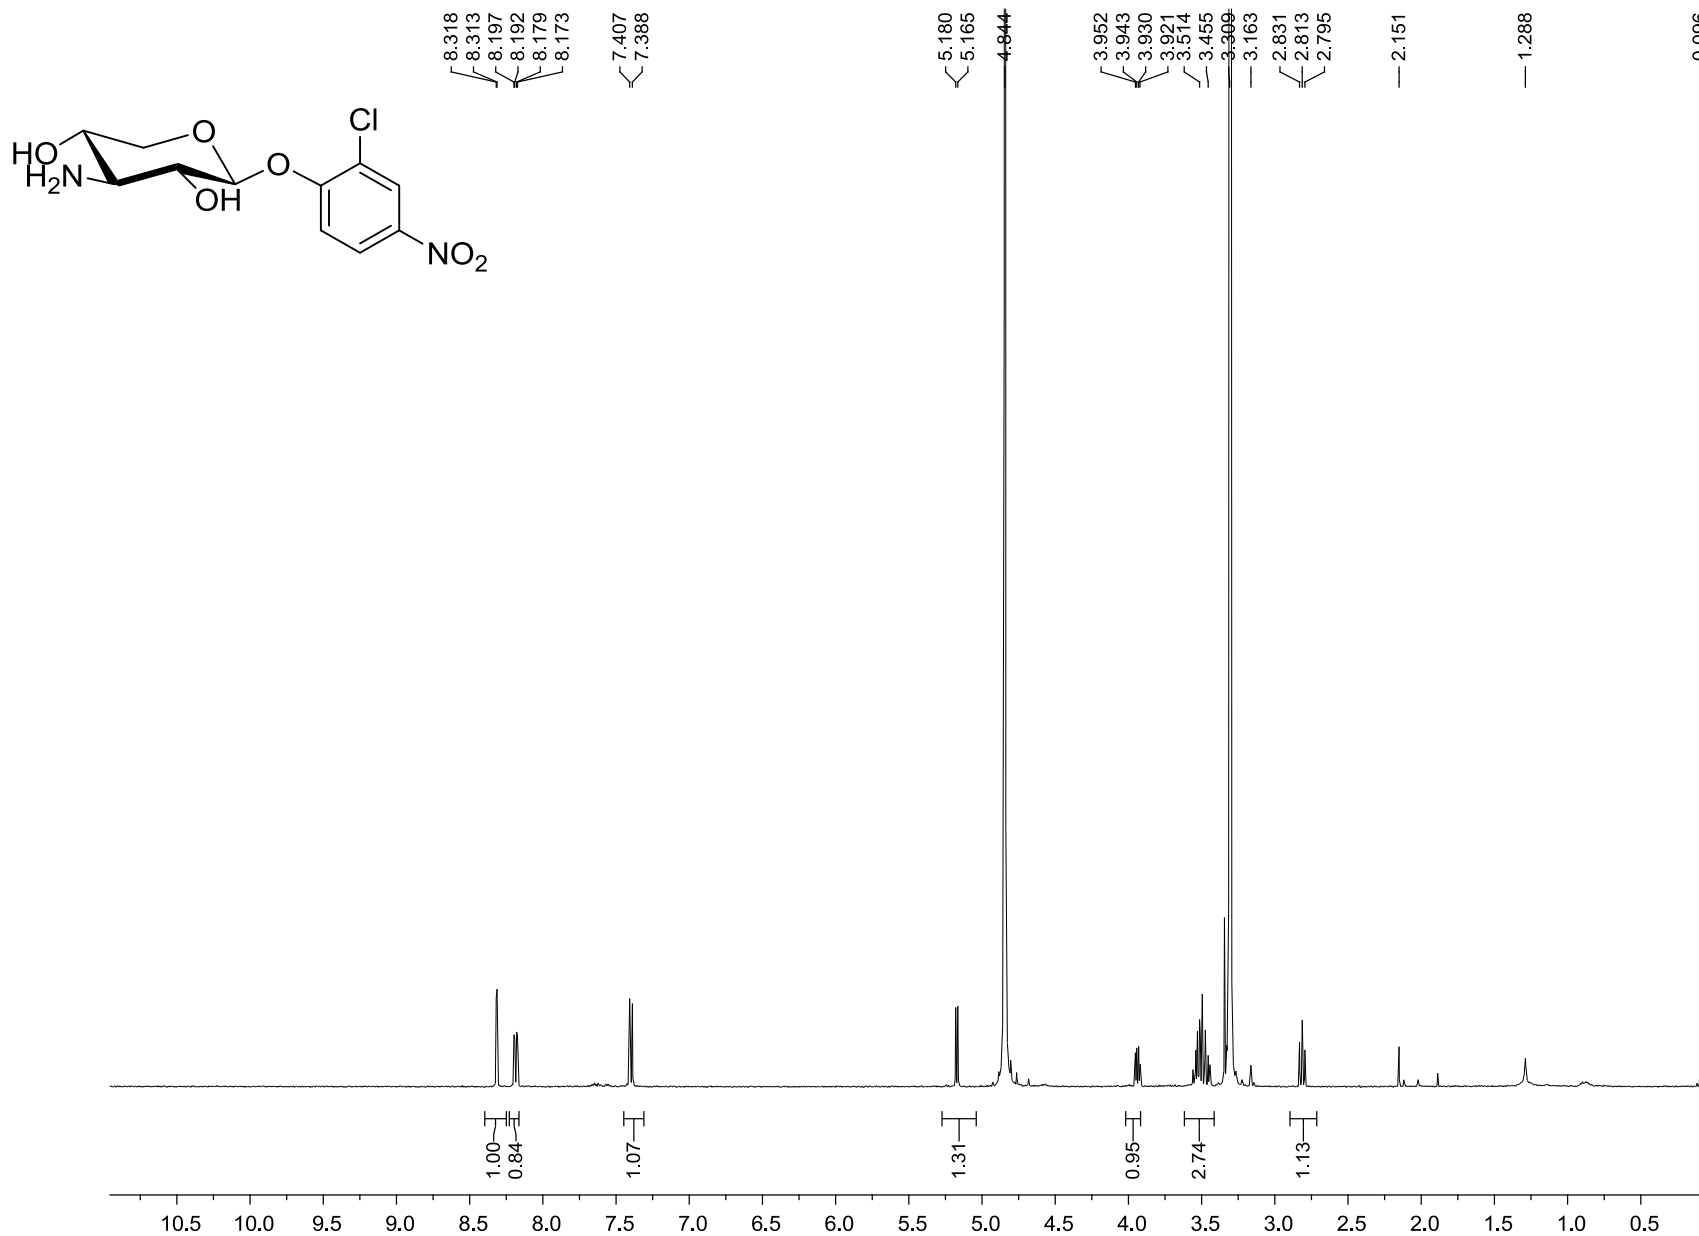

(2-chloro-4-nitrophenyl)-3-deoxy-3-amino- $\beta$ -D-xylopyranoside (**17**): gCOSY NMR (DMSO-*d*<sub>6</sub>, 500 MHz)

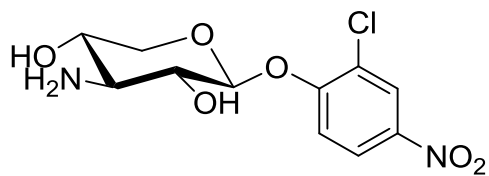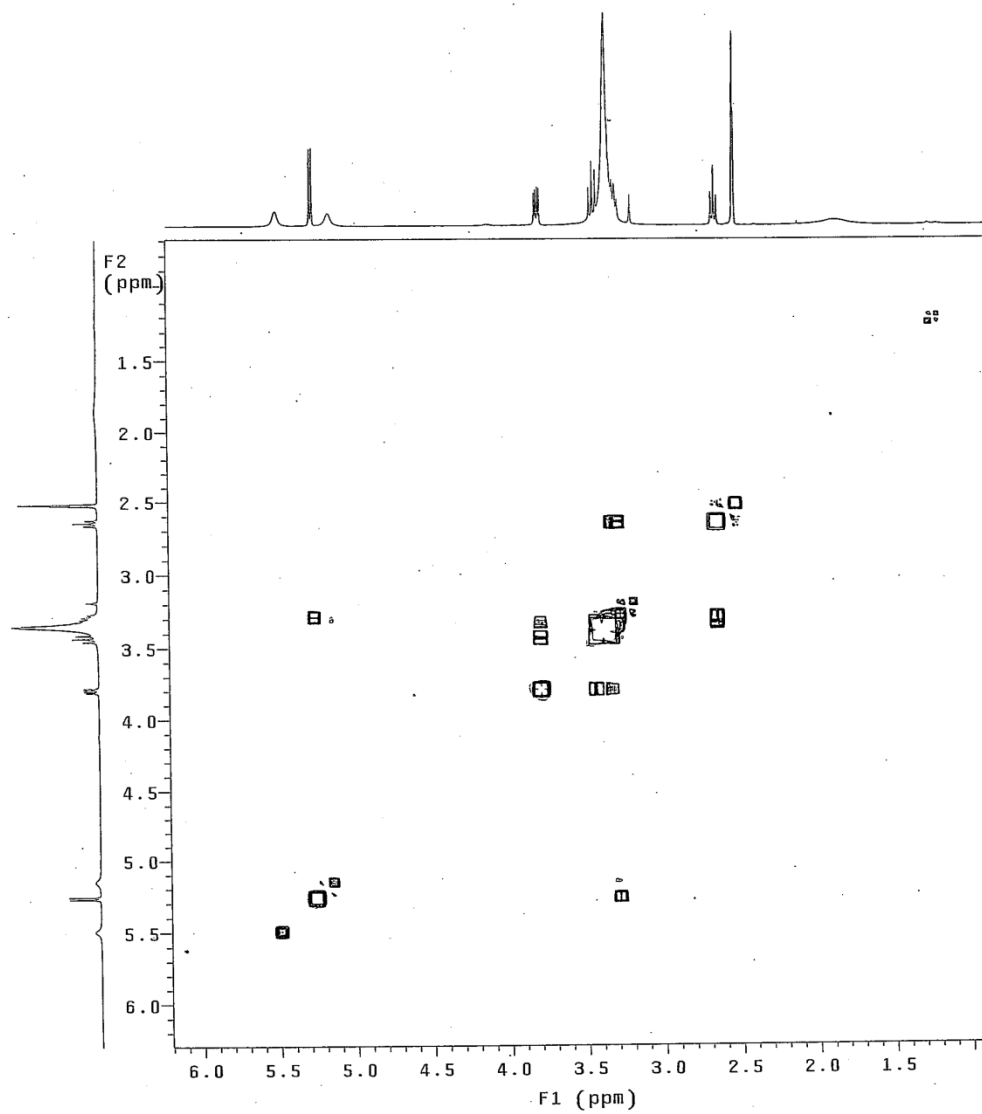

(2-chloro-4-nitrophenyl)-3-deoxy-3-amino- $\beta$ -D-xylopyranoside (**17**):  $^{13}\text{C}$  NMR (DMSO- $d_6$ , 500 MHz)

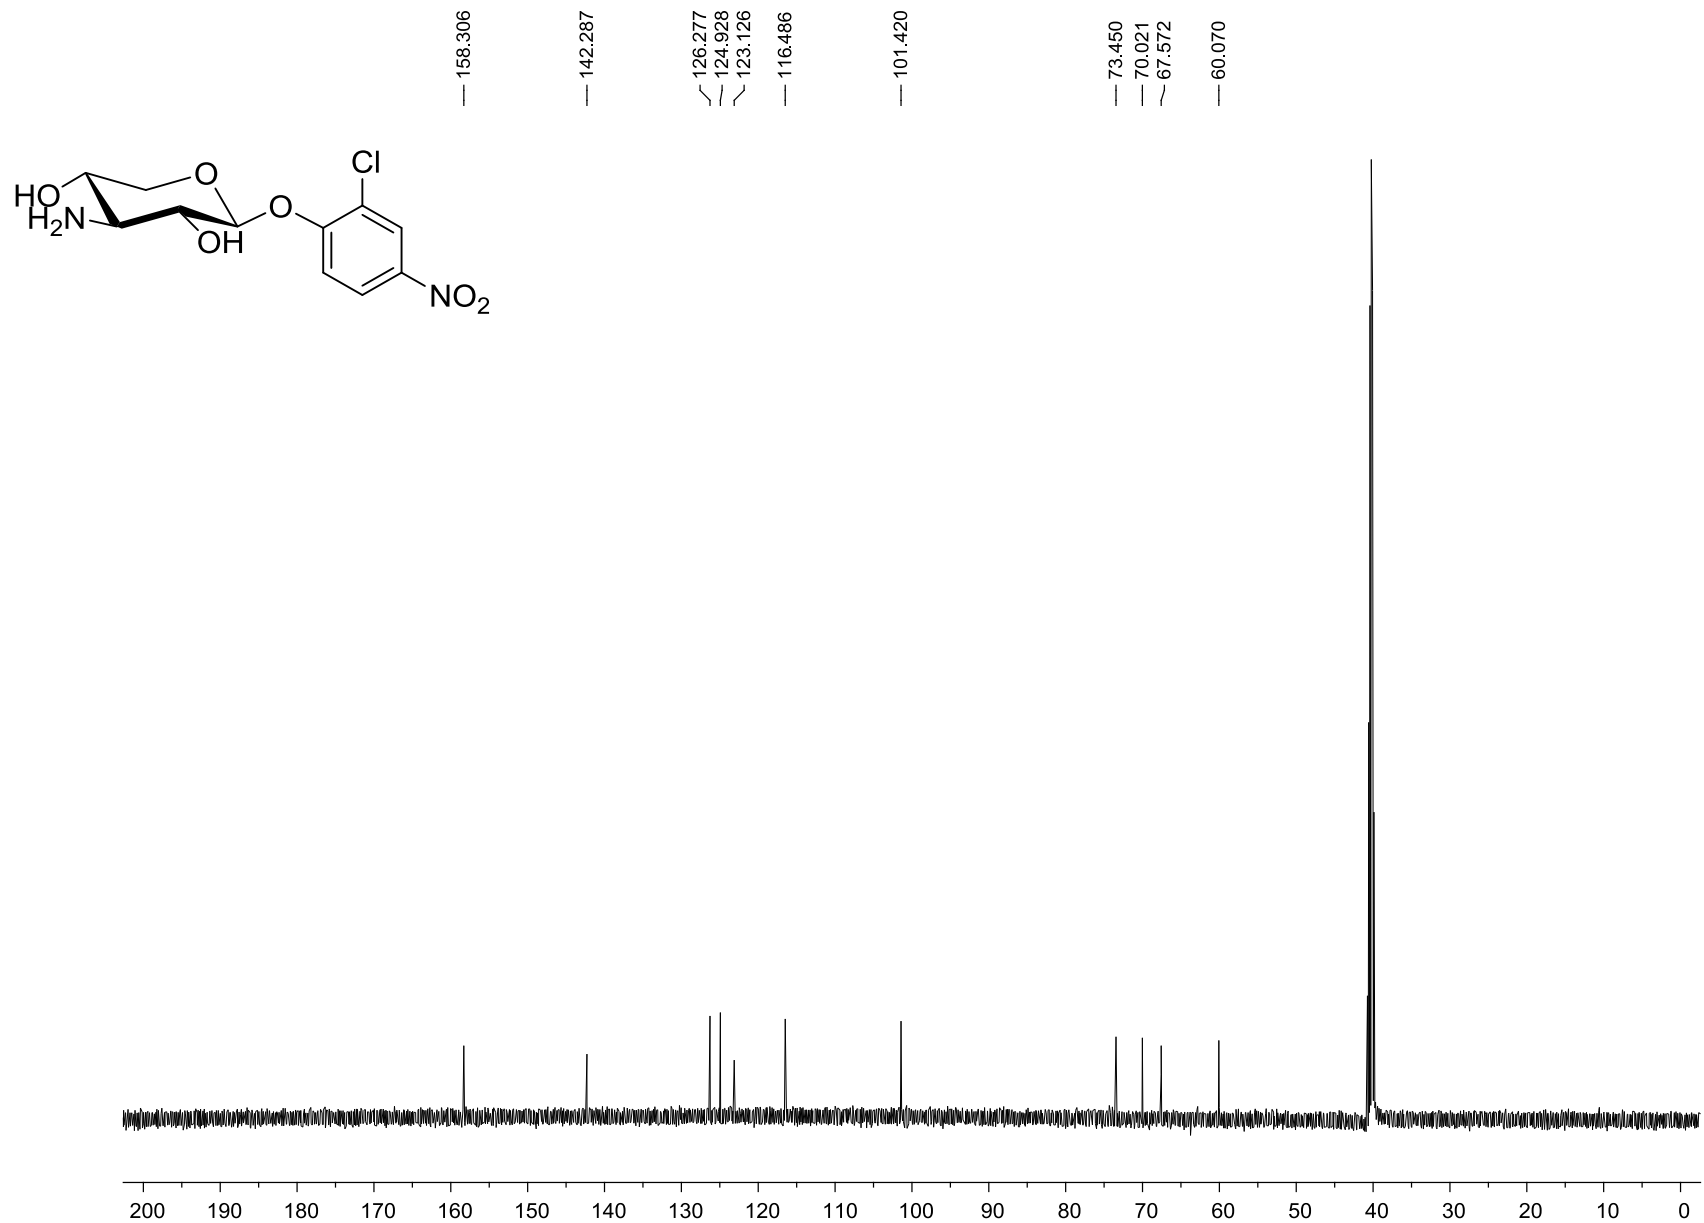

S90

(2-chloro-4-nitrophenyl)-3-deoxy-3-amino- $\beta$ -D-xylopyranoside hydrochloride (**17a**):  $^1\text{H}$  NMR ( $\text{D}_2\text{O}$ , 500 MHz)

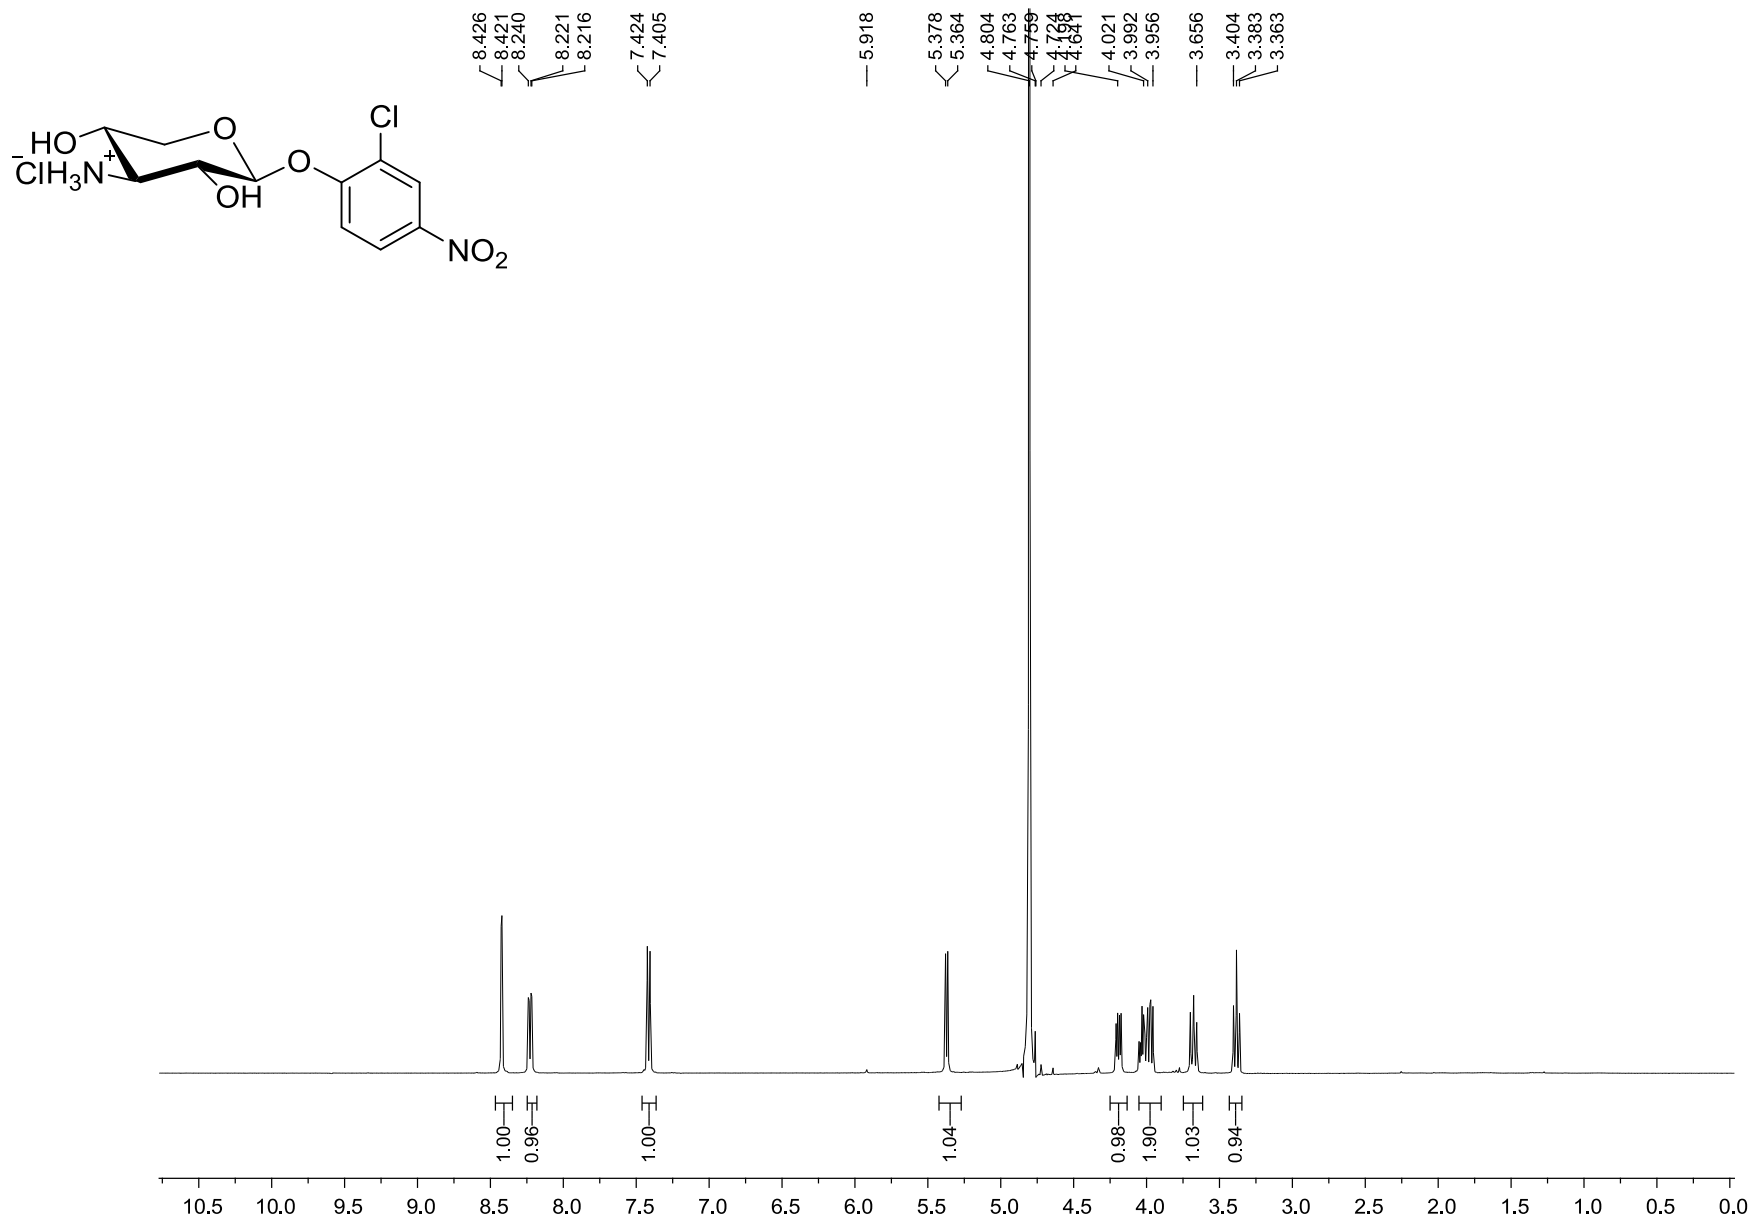

(2-chloro-4-nitrophenyl)-3-deoxy-3-amino- $\beta$ -D-xylopyranoside hydrochloride (**17a**): gCOSY NMR ( $D_2O$ , 500 MHz)

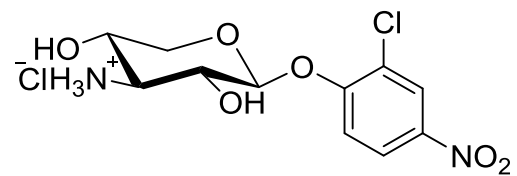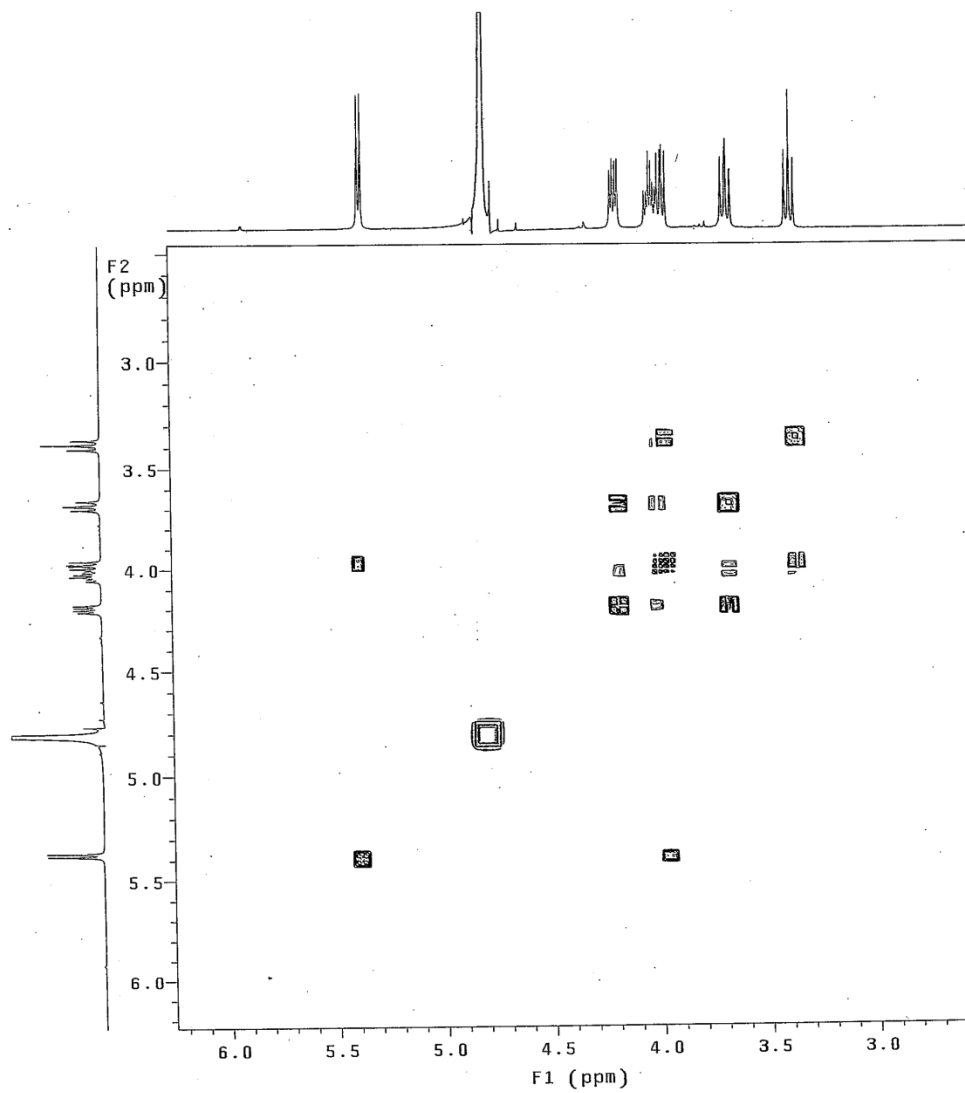



(2-chloro-4-nitrophenyl)-3-deoxy-3-amino- $\beta$ -D-xylopyranoside hydrochloride (**17a**):  $^{13}\text{C}$  NMR ( $\text{D}_2\text{O}$ , 125 MHz)

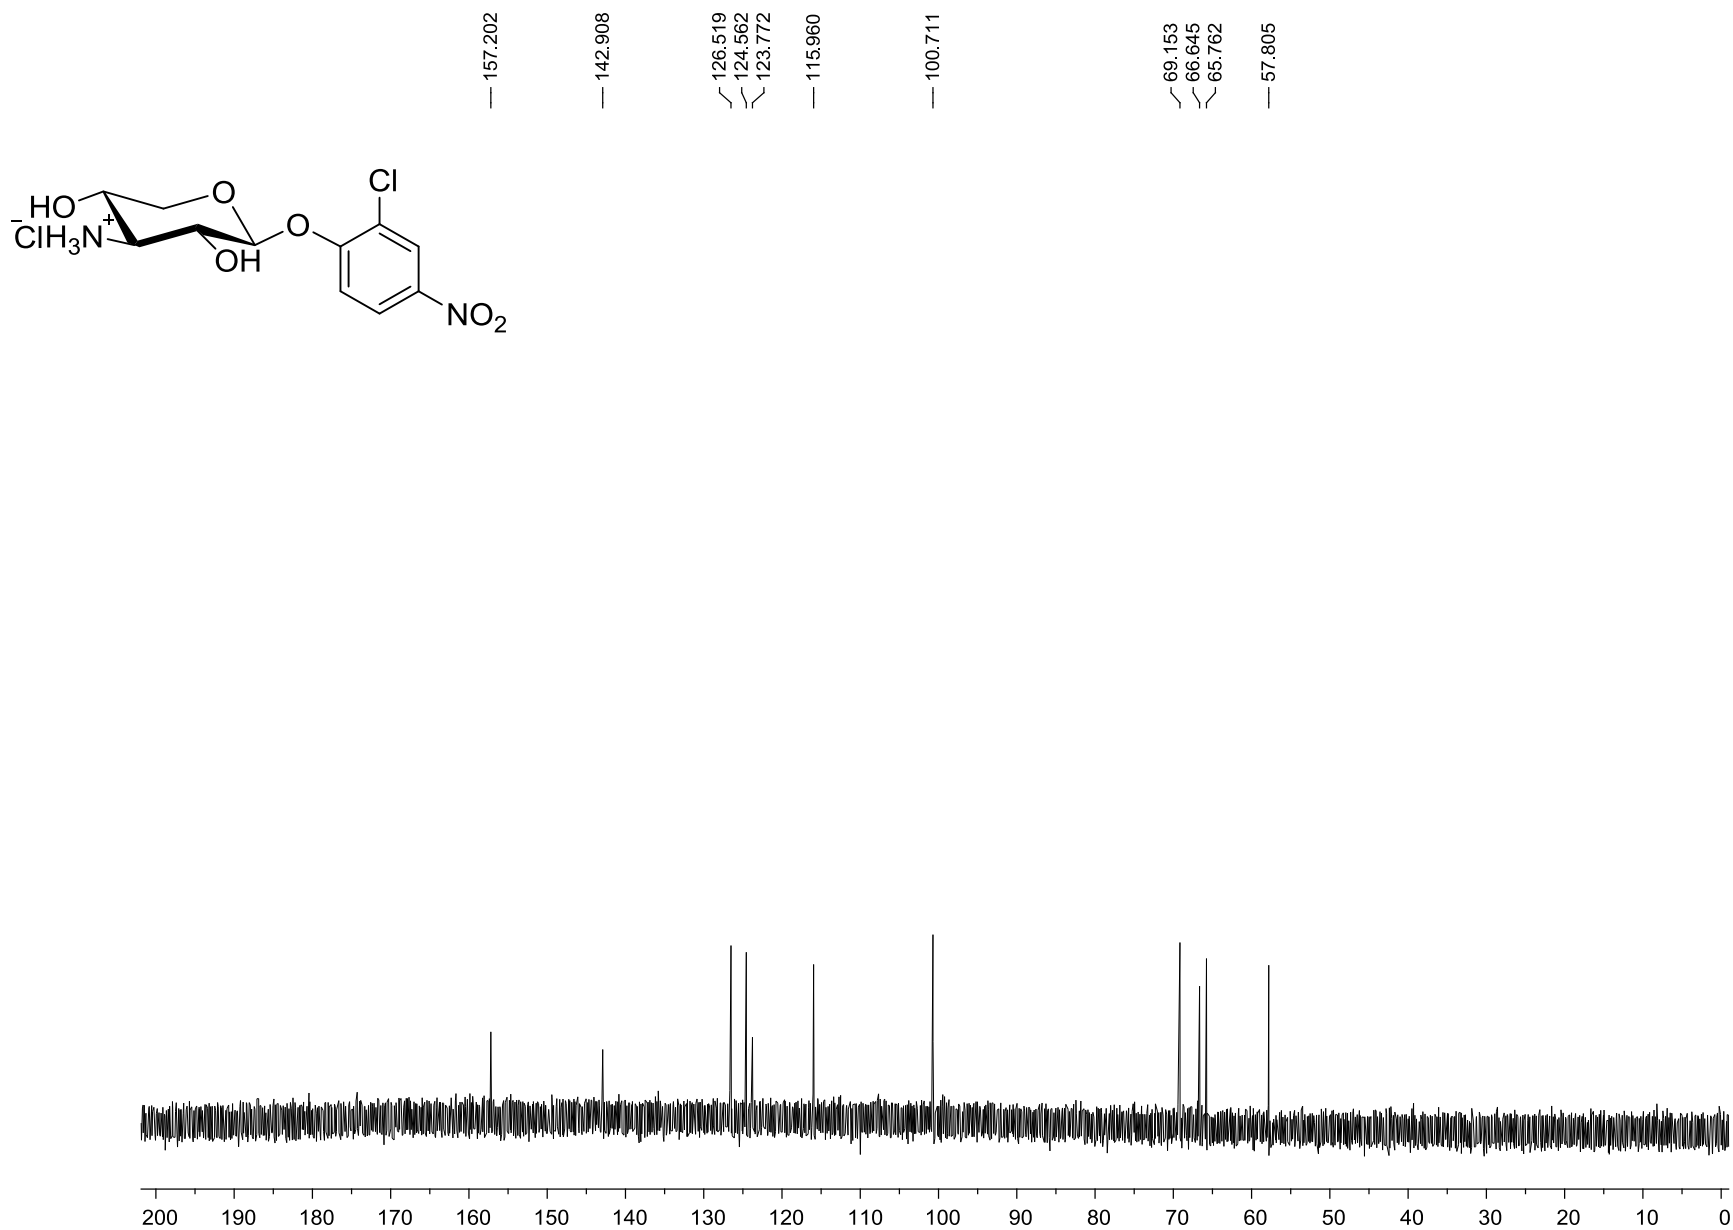

S93

(2-chloro-4-nitrophenyl)- $\beta$ -D-arabinopyranoside (**18d**):  $^1\text{H}$  NMR ( $\text{CD}_3\text{OD}$ , 500 MHz)

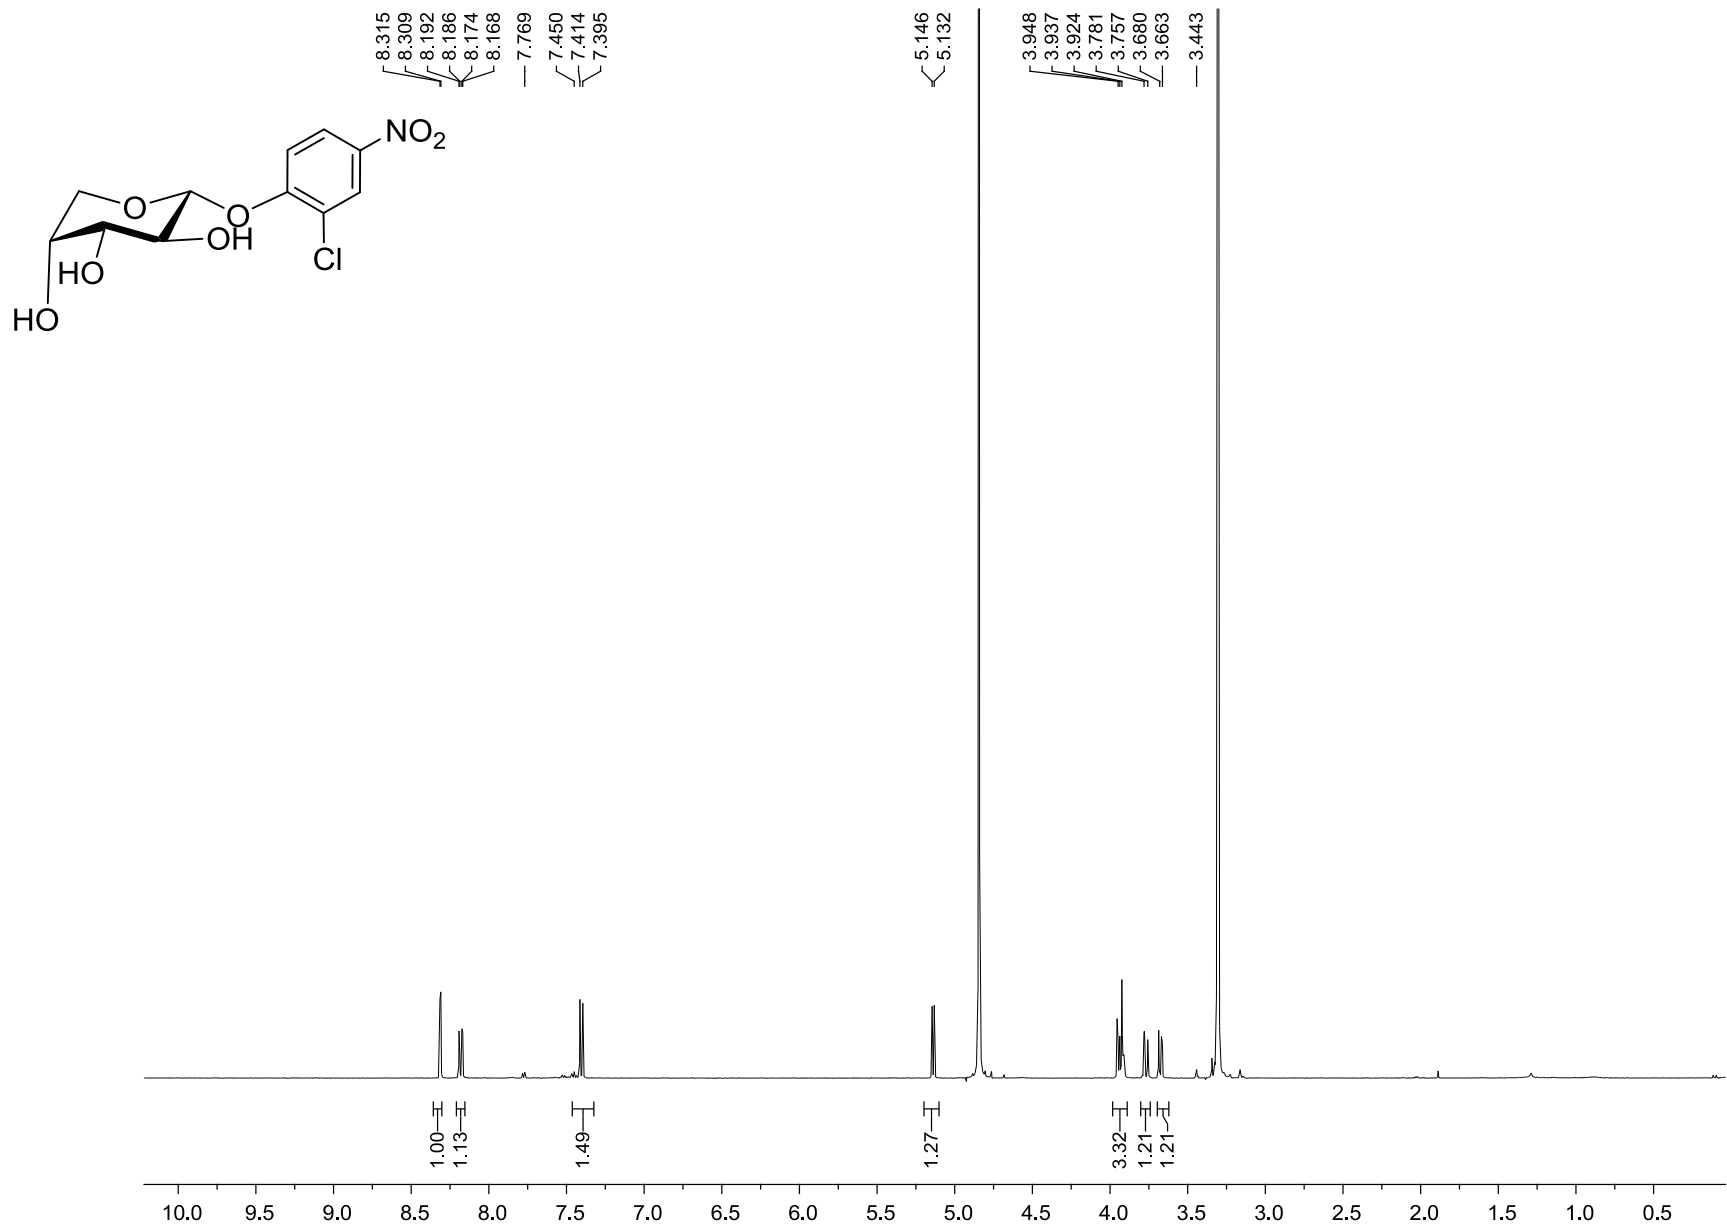

(2-chloro-4-nitrophenyl)- $\beta$ -D-arabinopyranoside (**18d**): gCOSY NMR (DMSO-*d*<sub>6</sub>, 500 MHz)

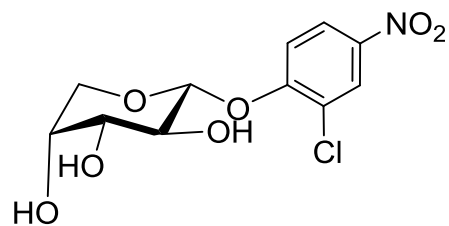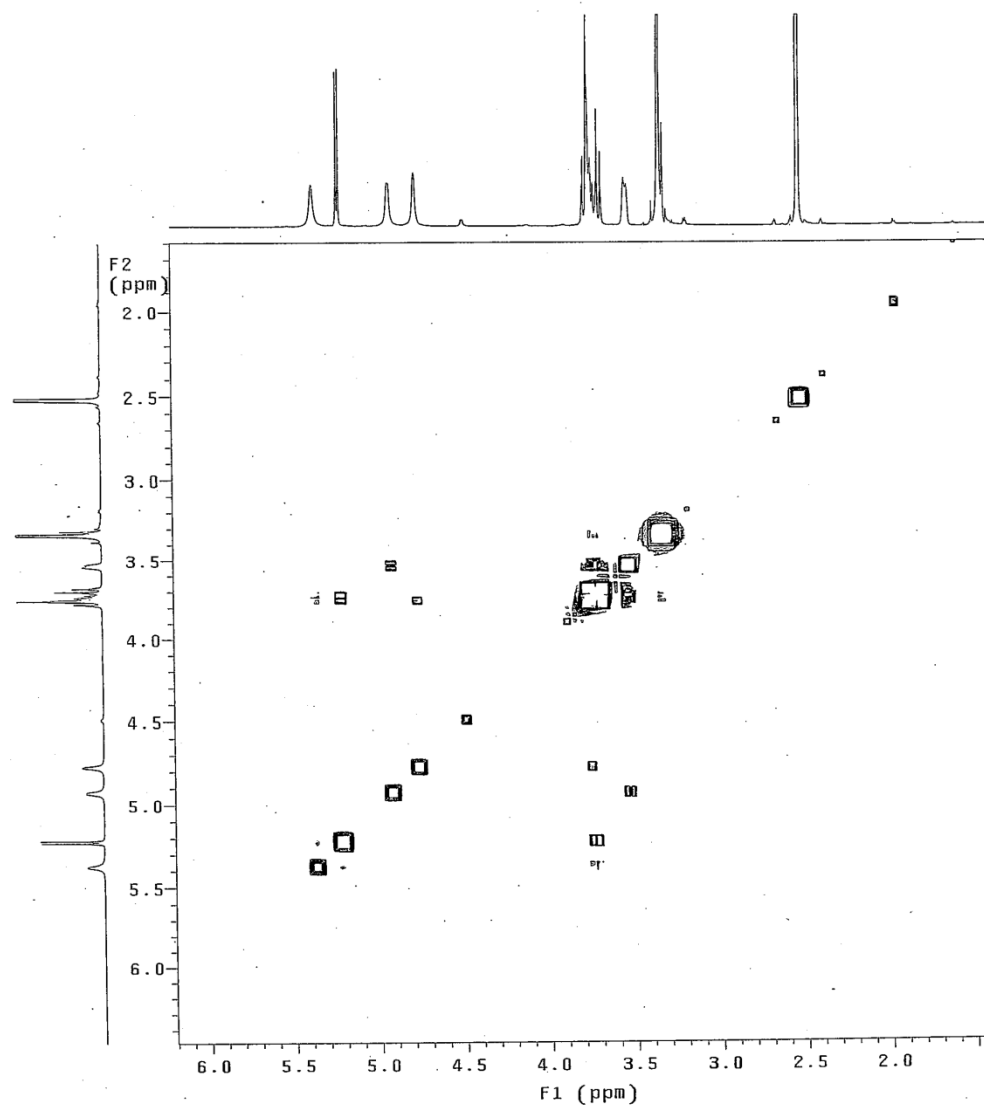

(2-chloro-4-nitrophenyl)- $\beta$ -D-arabinopyranoside (**18d**):  $^{13}\text{C}$  NMR (DMSO- $d_6$ , 500 MHz)

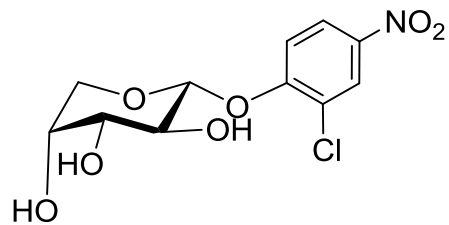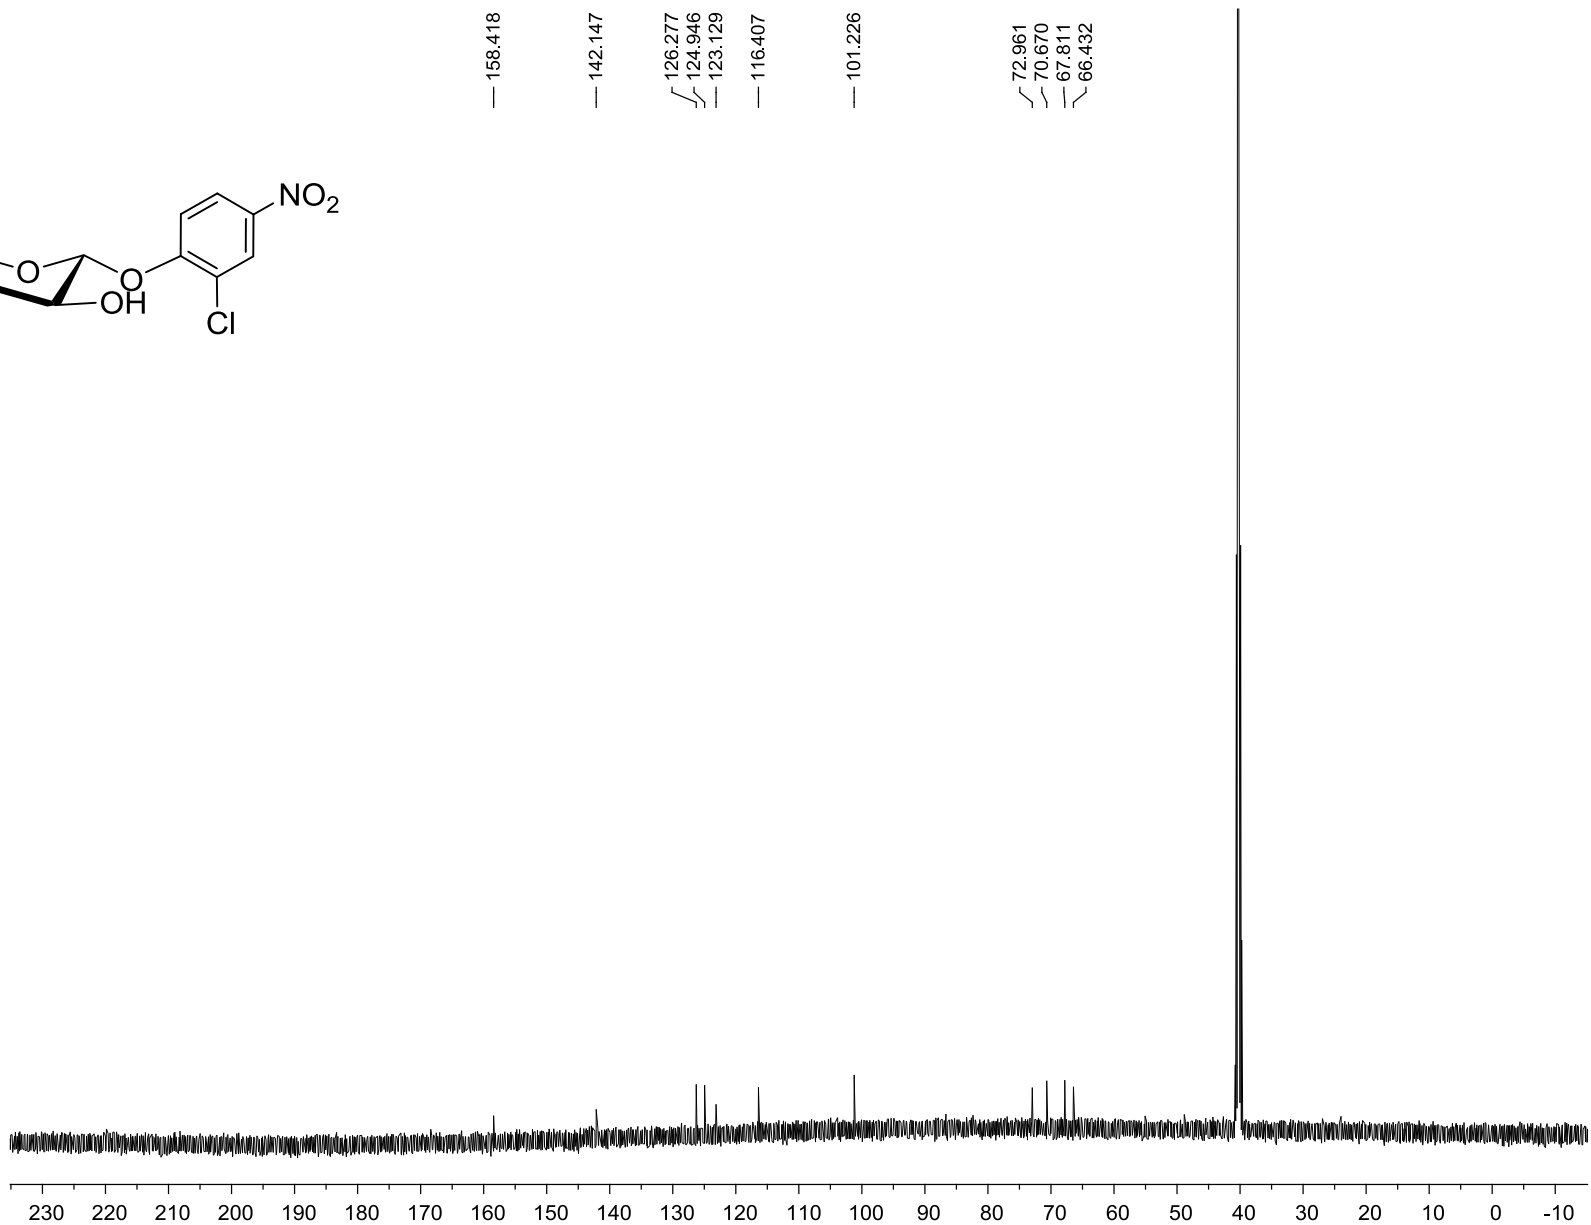

(2-chloro-4-nitrophenyl)- $\alpha$ -L-arabinopyranoside (**18**):  $^1\text{H}$  NMR ( $\text{CD}_3\text{OD}$ , 400 MHz)

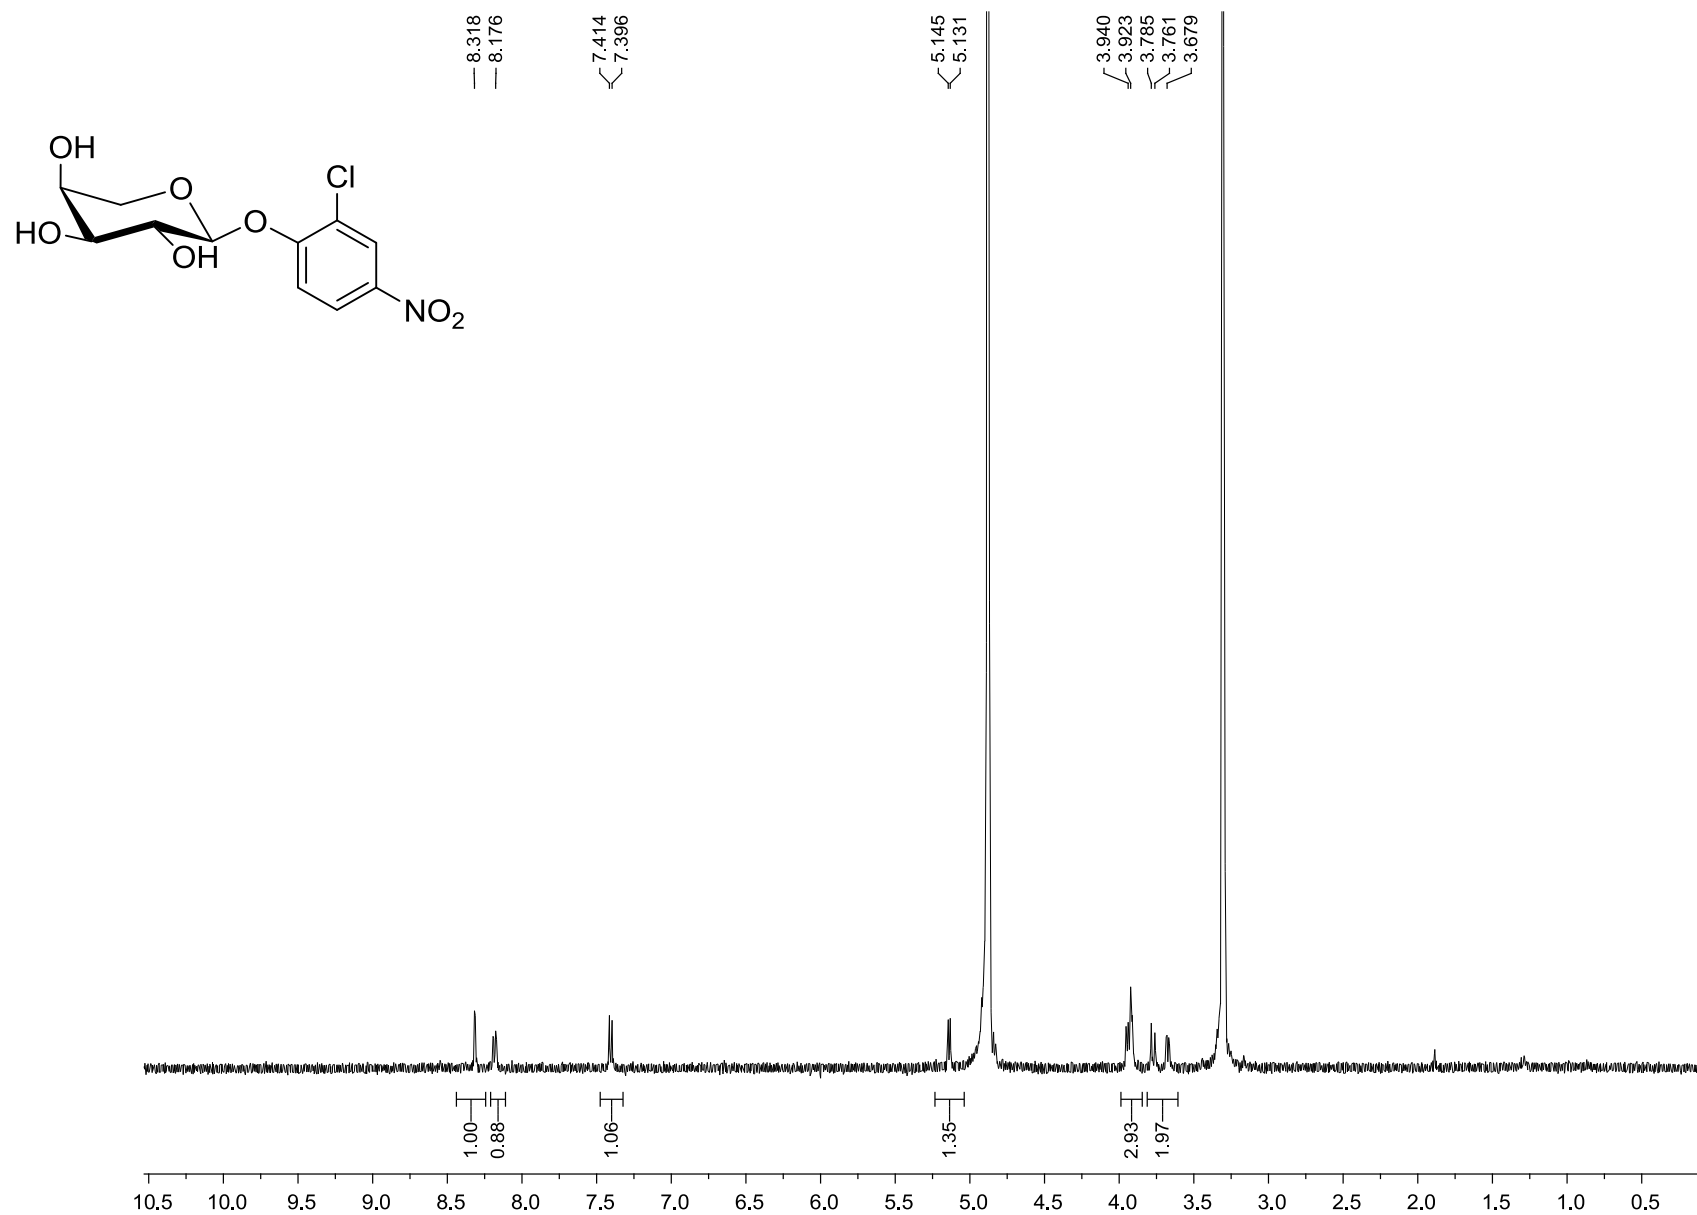

(2-chloro-4-nitrophenyl)- $\alpha$ -L-arabinopyranoside (**18**):  $^{13}\text{C}$  NMR (DMSO- $d_6$ , 100 MHz)

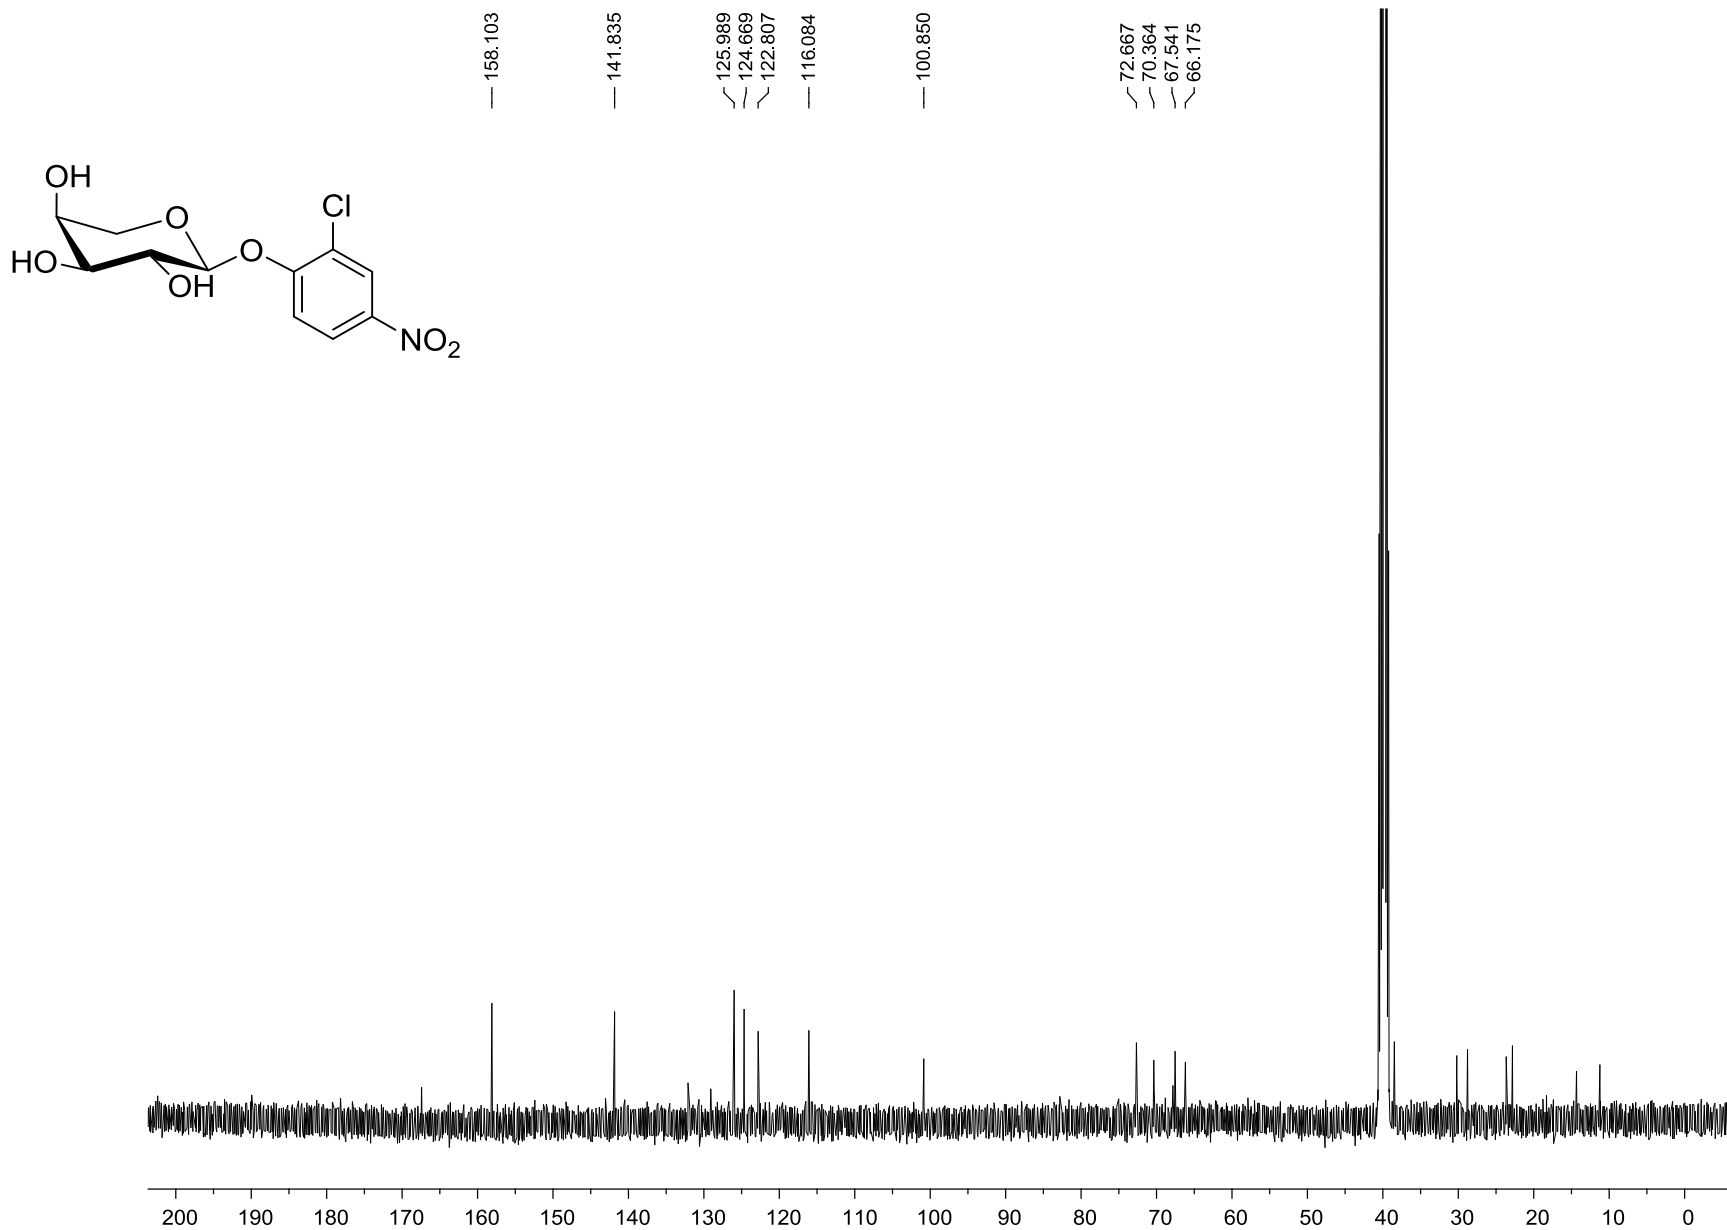

(2-chloro-4-nitrophenyl)-6-deoxy-6-aminoacetyl- $\beta$ -D-glucofuranoside (**19**):  $^1\text{H}$  NMR ( $\text{CD}_3\text{OD}$ , 400 MHz)

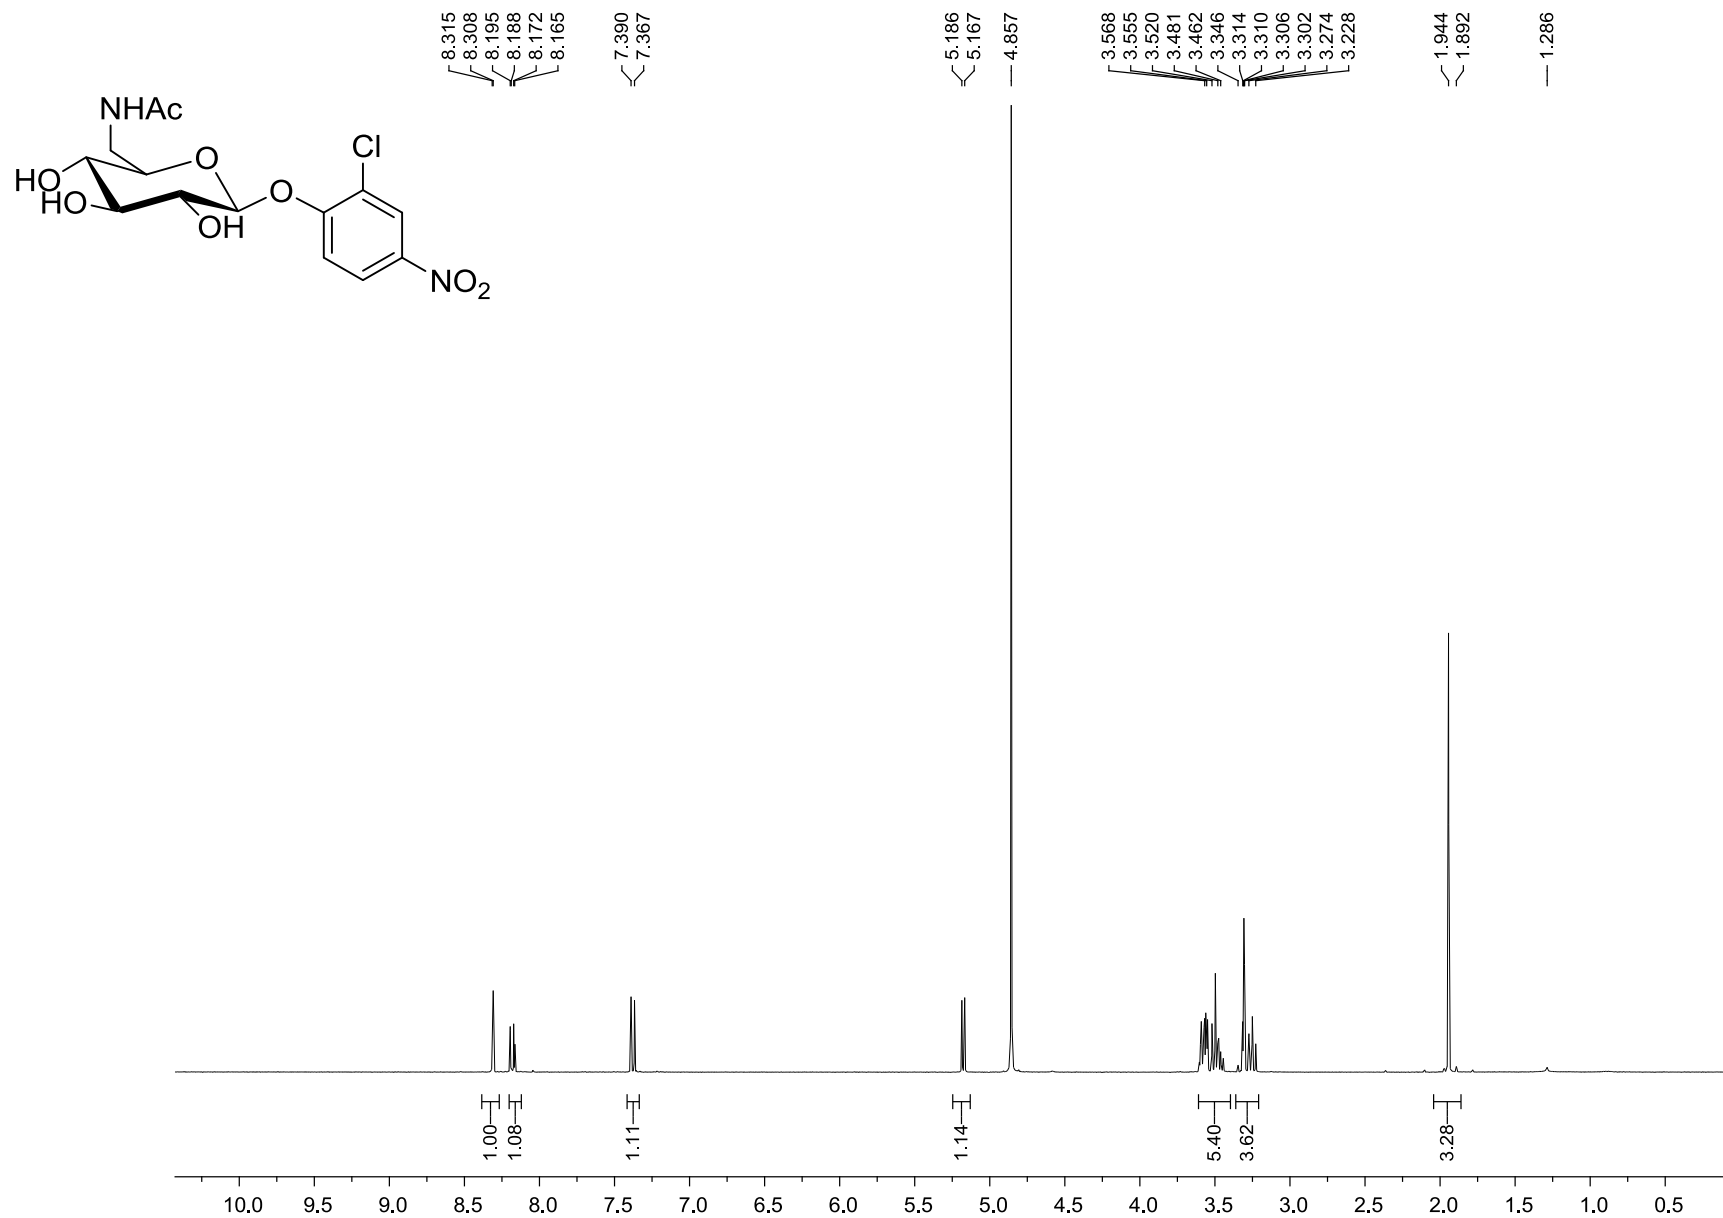

(2-chloro-4-nitrophenyl)-6-deoxy-6-aminoacetyl- $\beta$ -D-glucopyranoside (**19**):  $^{13}\text{C}$  NMR ( $\text{CD}_3\text{OD}$ , 100 MHz)

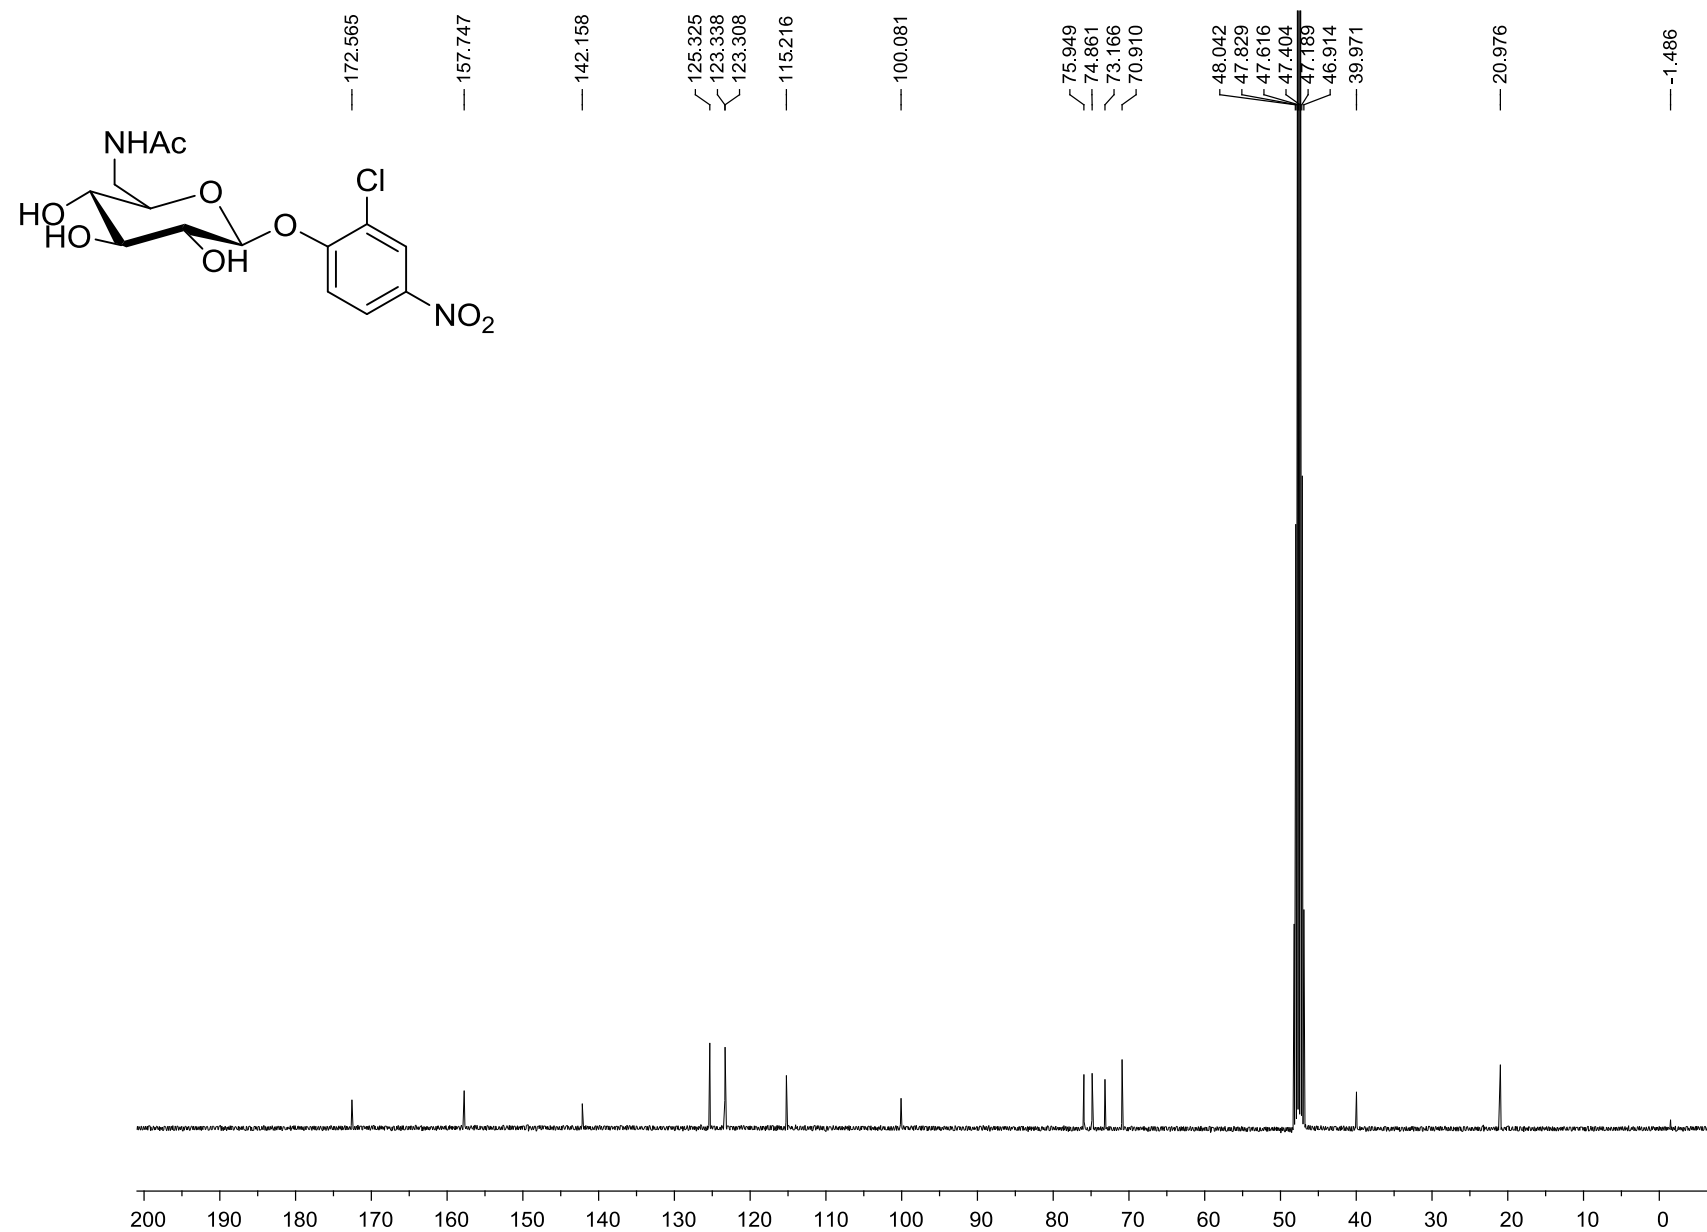

S100



(2-chloro-4-nitrophenyl)-2-amino- $\alpha$ -D-glucopyranoside (**20**):  $^1\text{H}$  NMR ( $\text{CD}_3\text{OD}$ , 500 MHz)

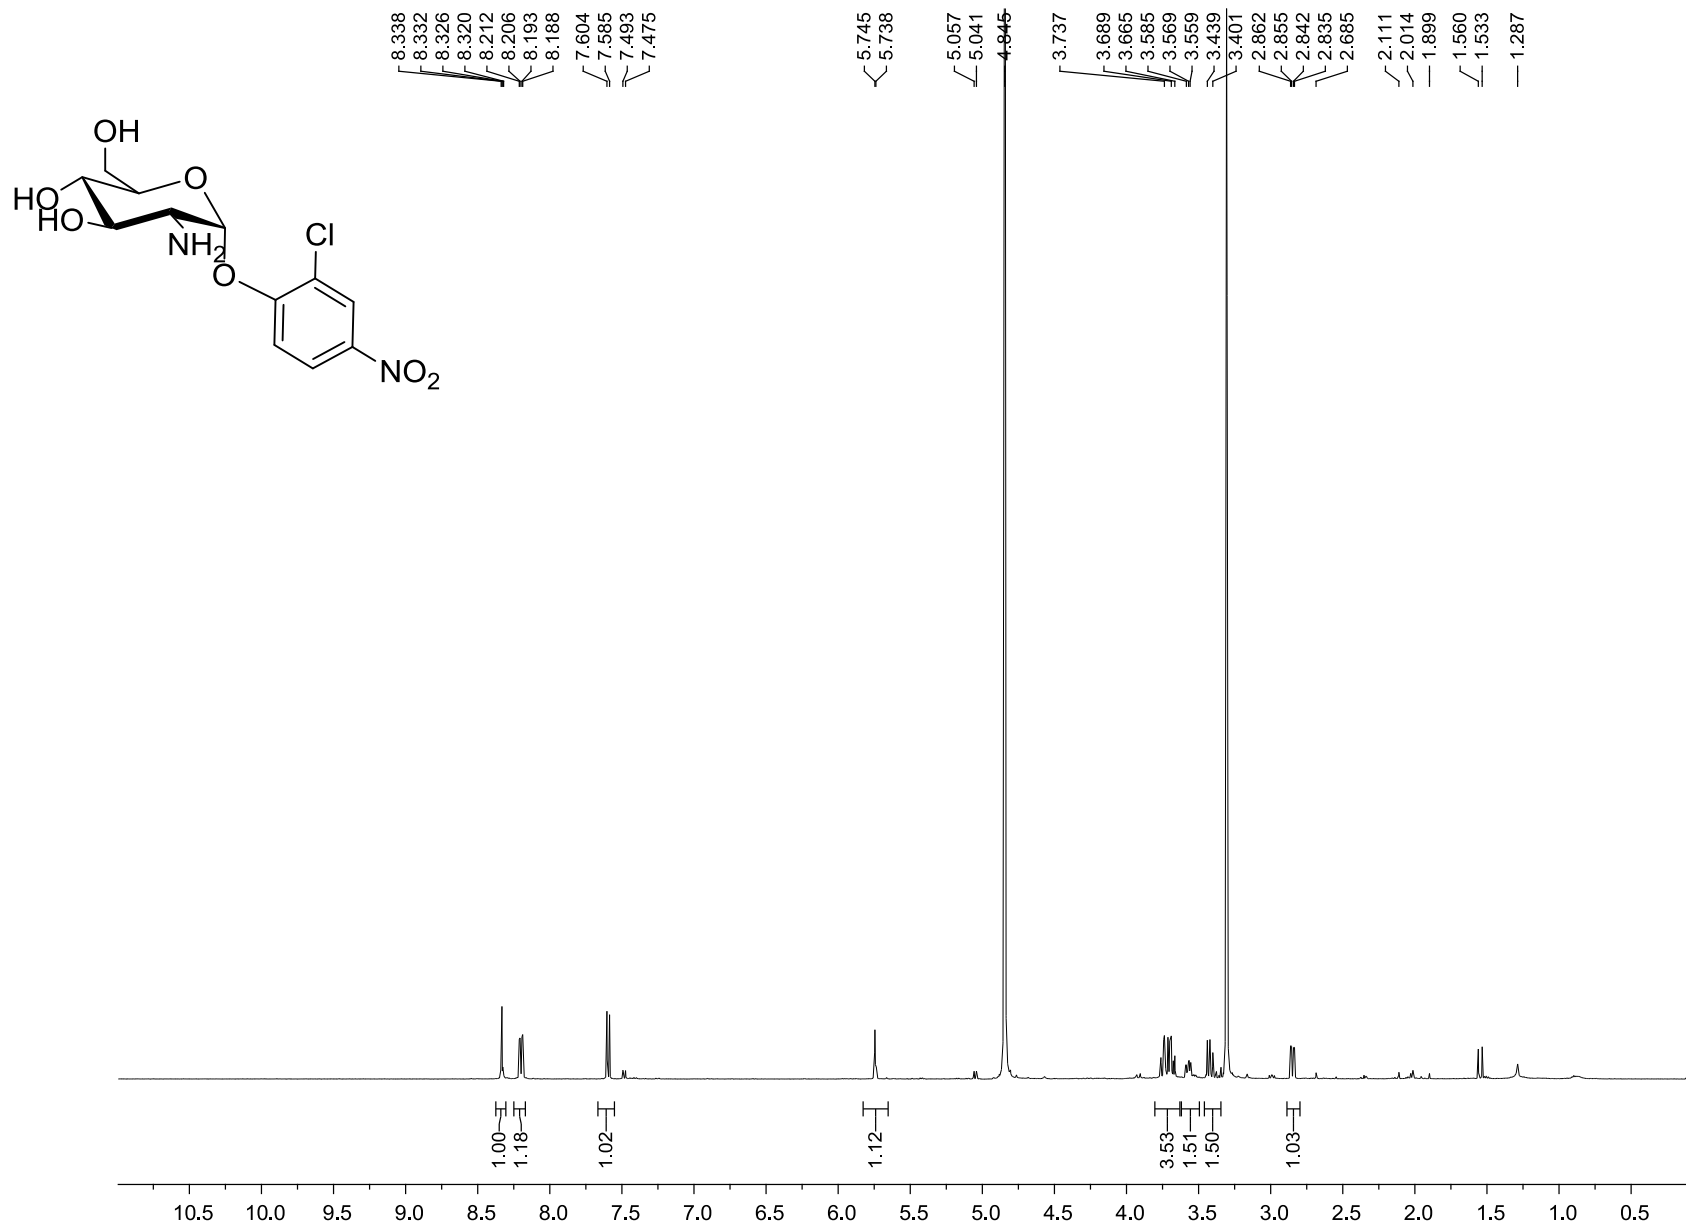

(2-chloro-4-nitrophenyl)-2-amino- $\alpha$ -D-glucofuranoside (**20**): gCOSY NMR ( $\text{CD}_3\text{OD}$ , 500 MHz)

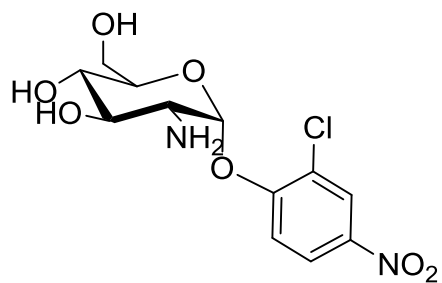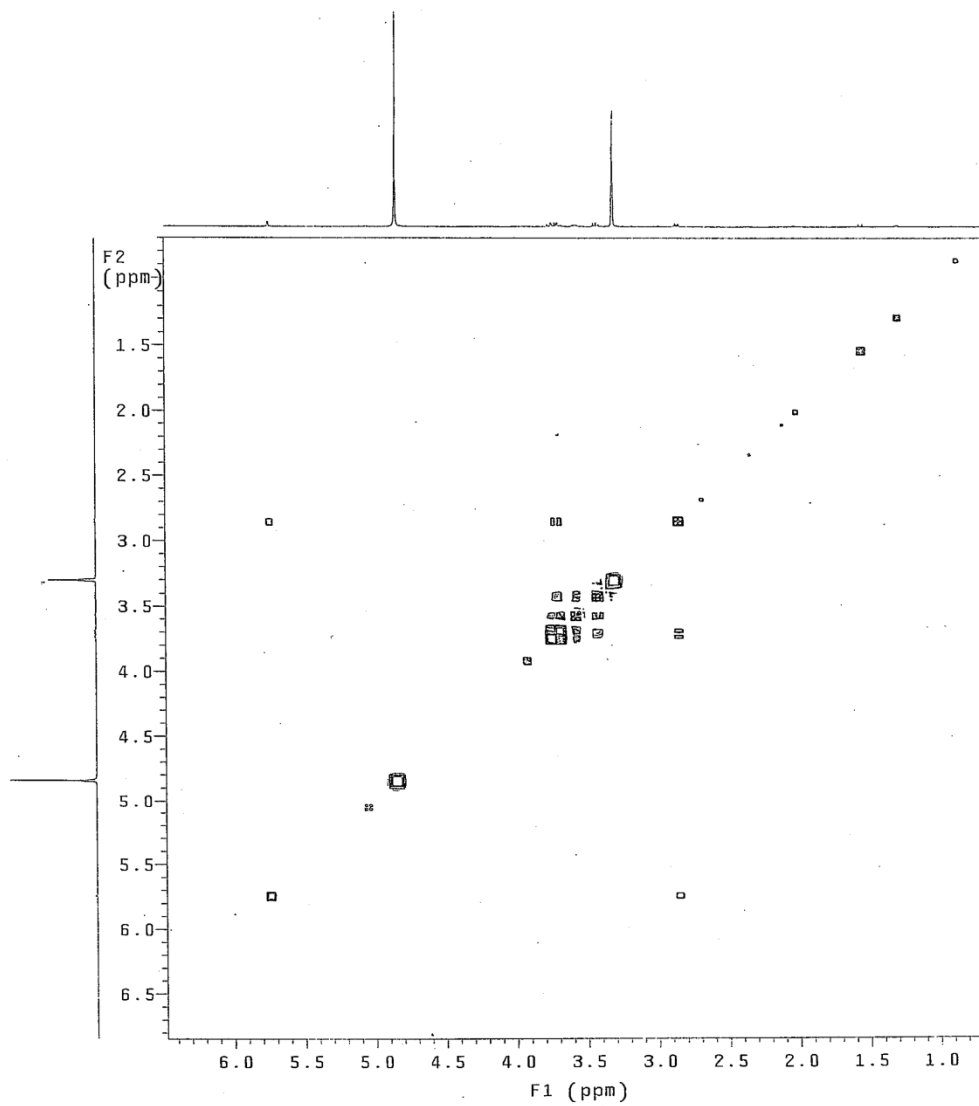

S102

(2-chloro-4-nitrophenyl)-2-amino- $\alpha$ -D-glucopyranoside (**20**):  $^{13}\text{C}$  NMR ( $\text{CD}_3\text{OD}$ , 100 MHz)

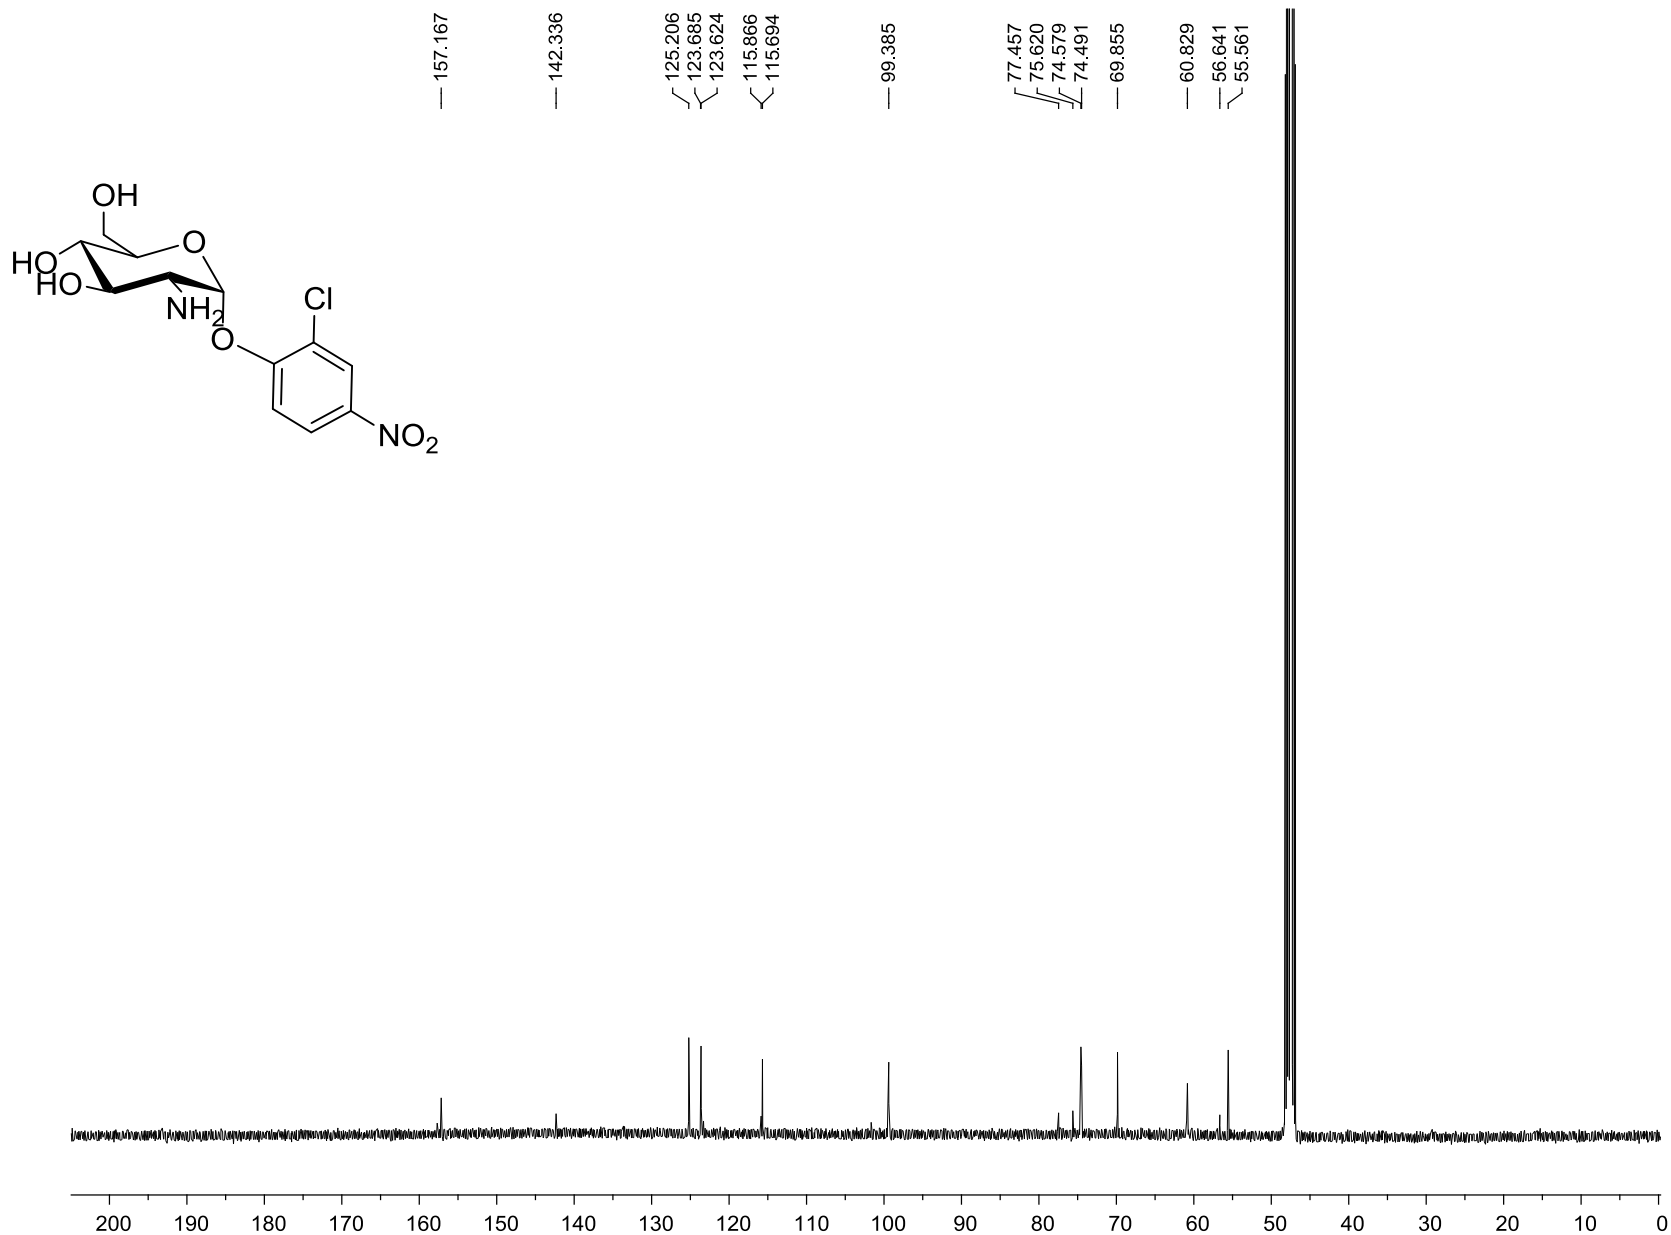

S103

(2-chloro-4-nitrophenyl)-3,4,6-tri-O-acetyl-2-deoxy-2-azido-β-D-glucopyranoside (**23**): <sup>1</sup>H NMR (CDCl<sub>3</sub>, 400 MHz)

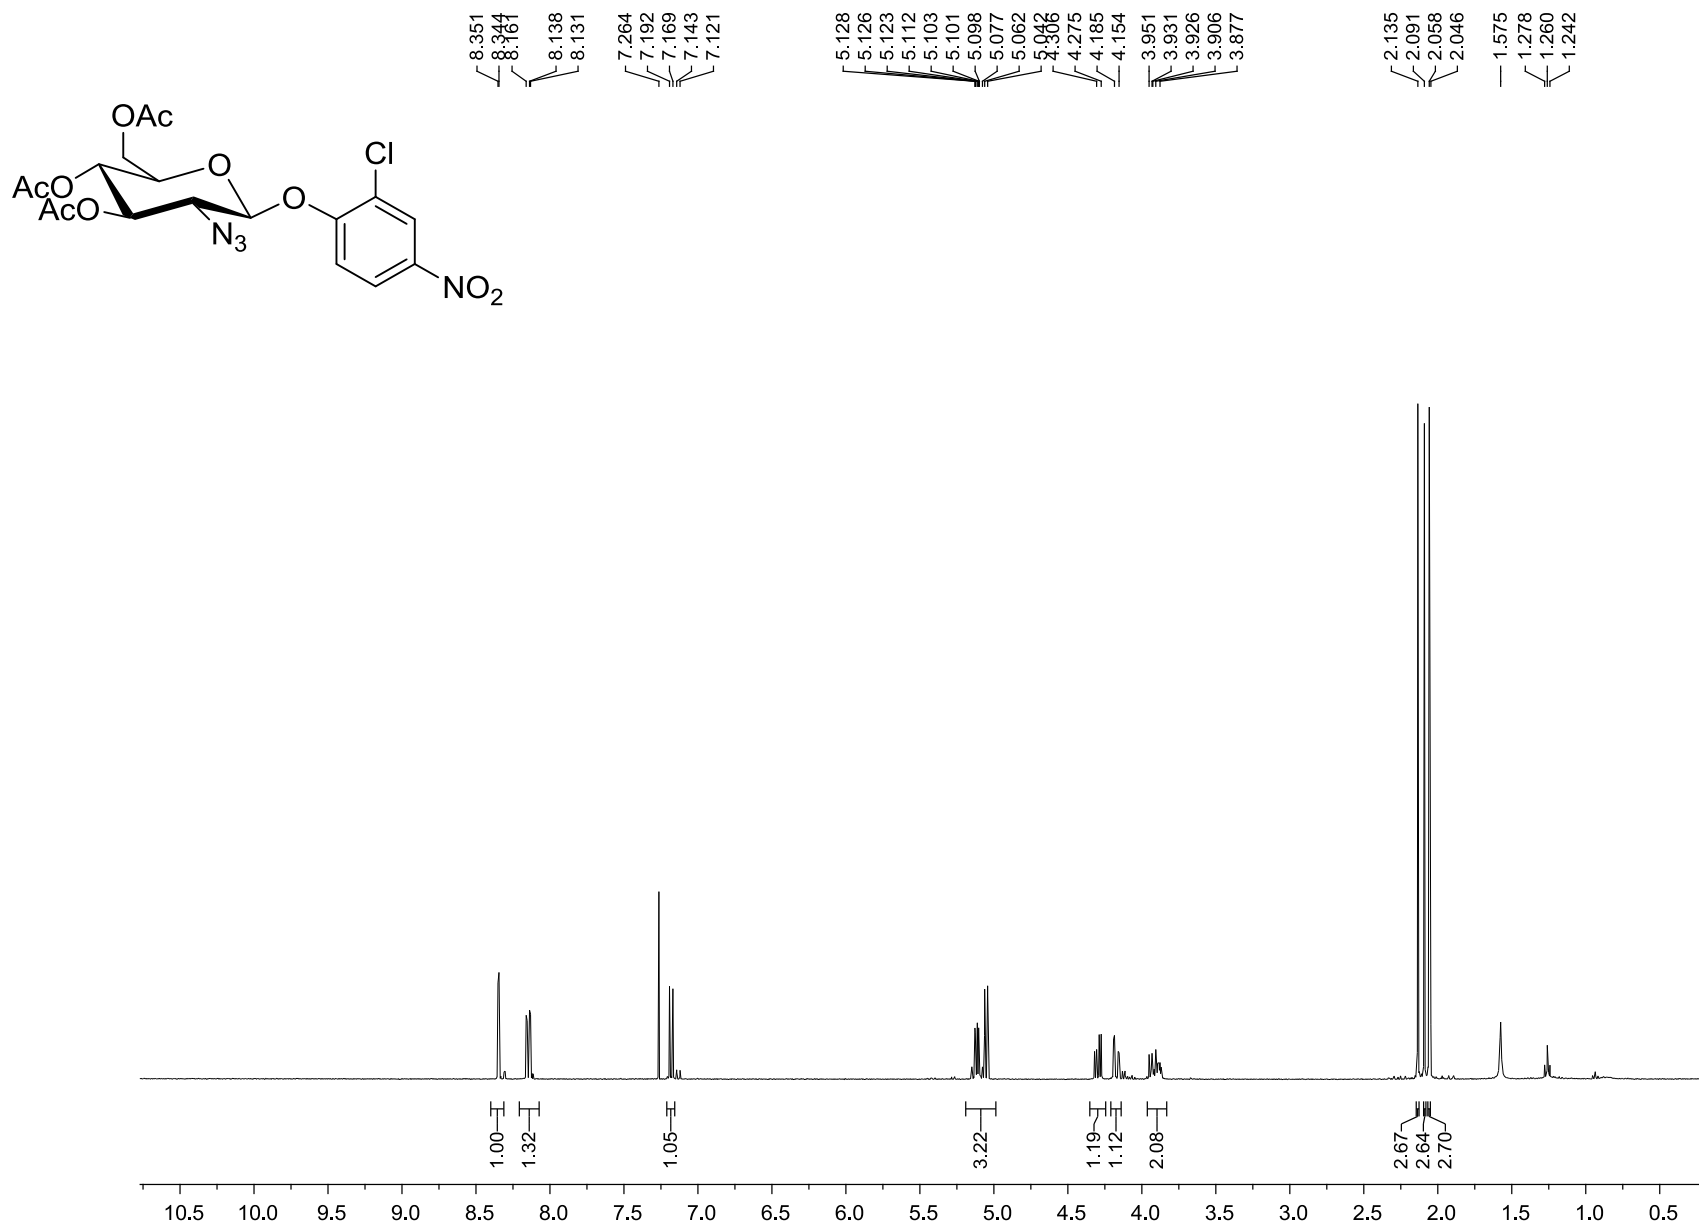

(2-chloro-4-nitrophenyl)-3,4,6-tri-O-acetyl-2-deoxy-2-azido-β-D-glucopyranoside (**23**): <sup>13</sup>C NMR (CDCl<sub>3</sub>, 125 MHz)

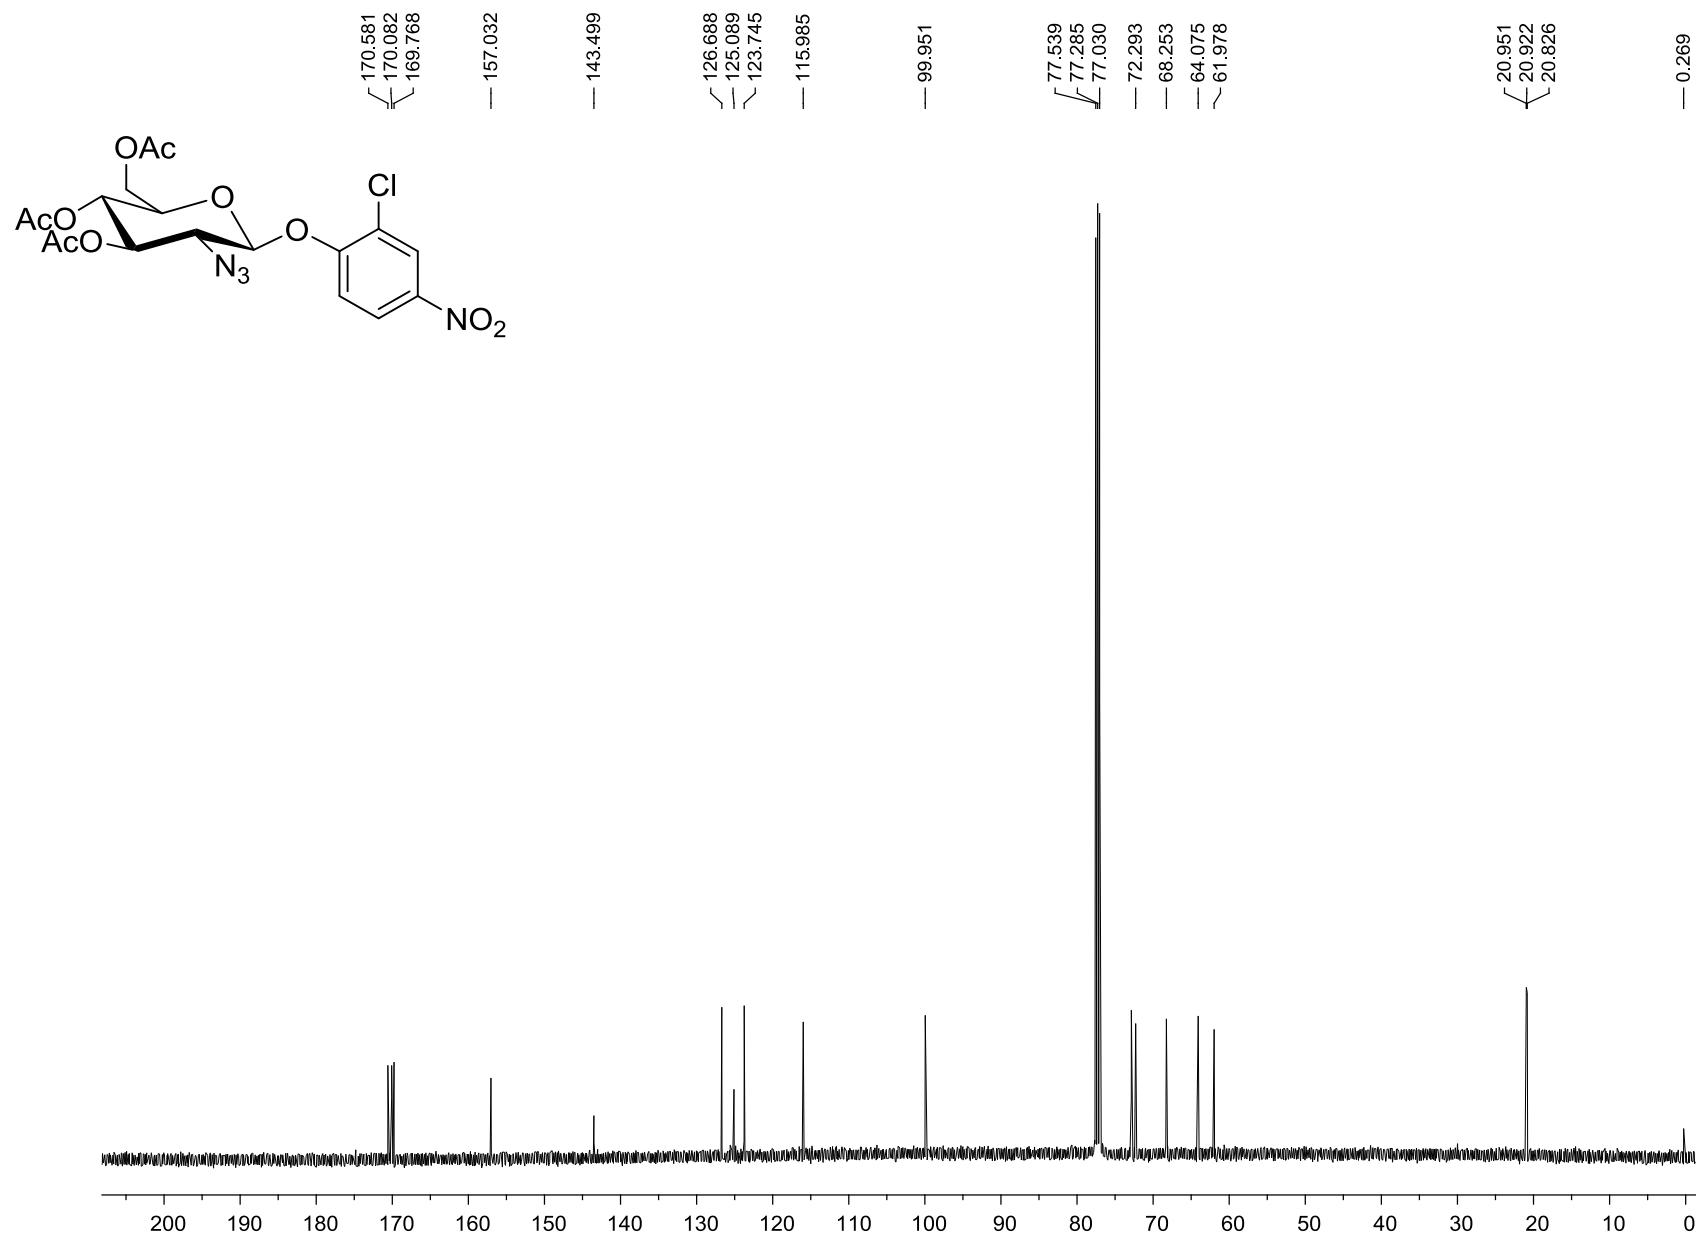

(2-chloro-4-nitrophenyl)-2,4,6-tri-O-acetyl-3-deoxy-3-azido- $\beta$ -D-glucopyranoside (**25**):  $^1\text{H}$  NMR ( $\text{CDCl}_3$ , 400 MHz)

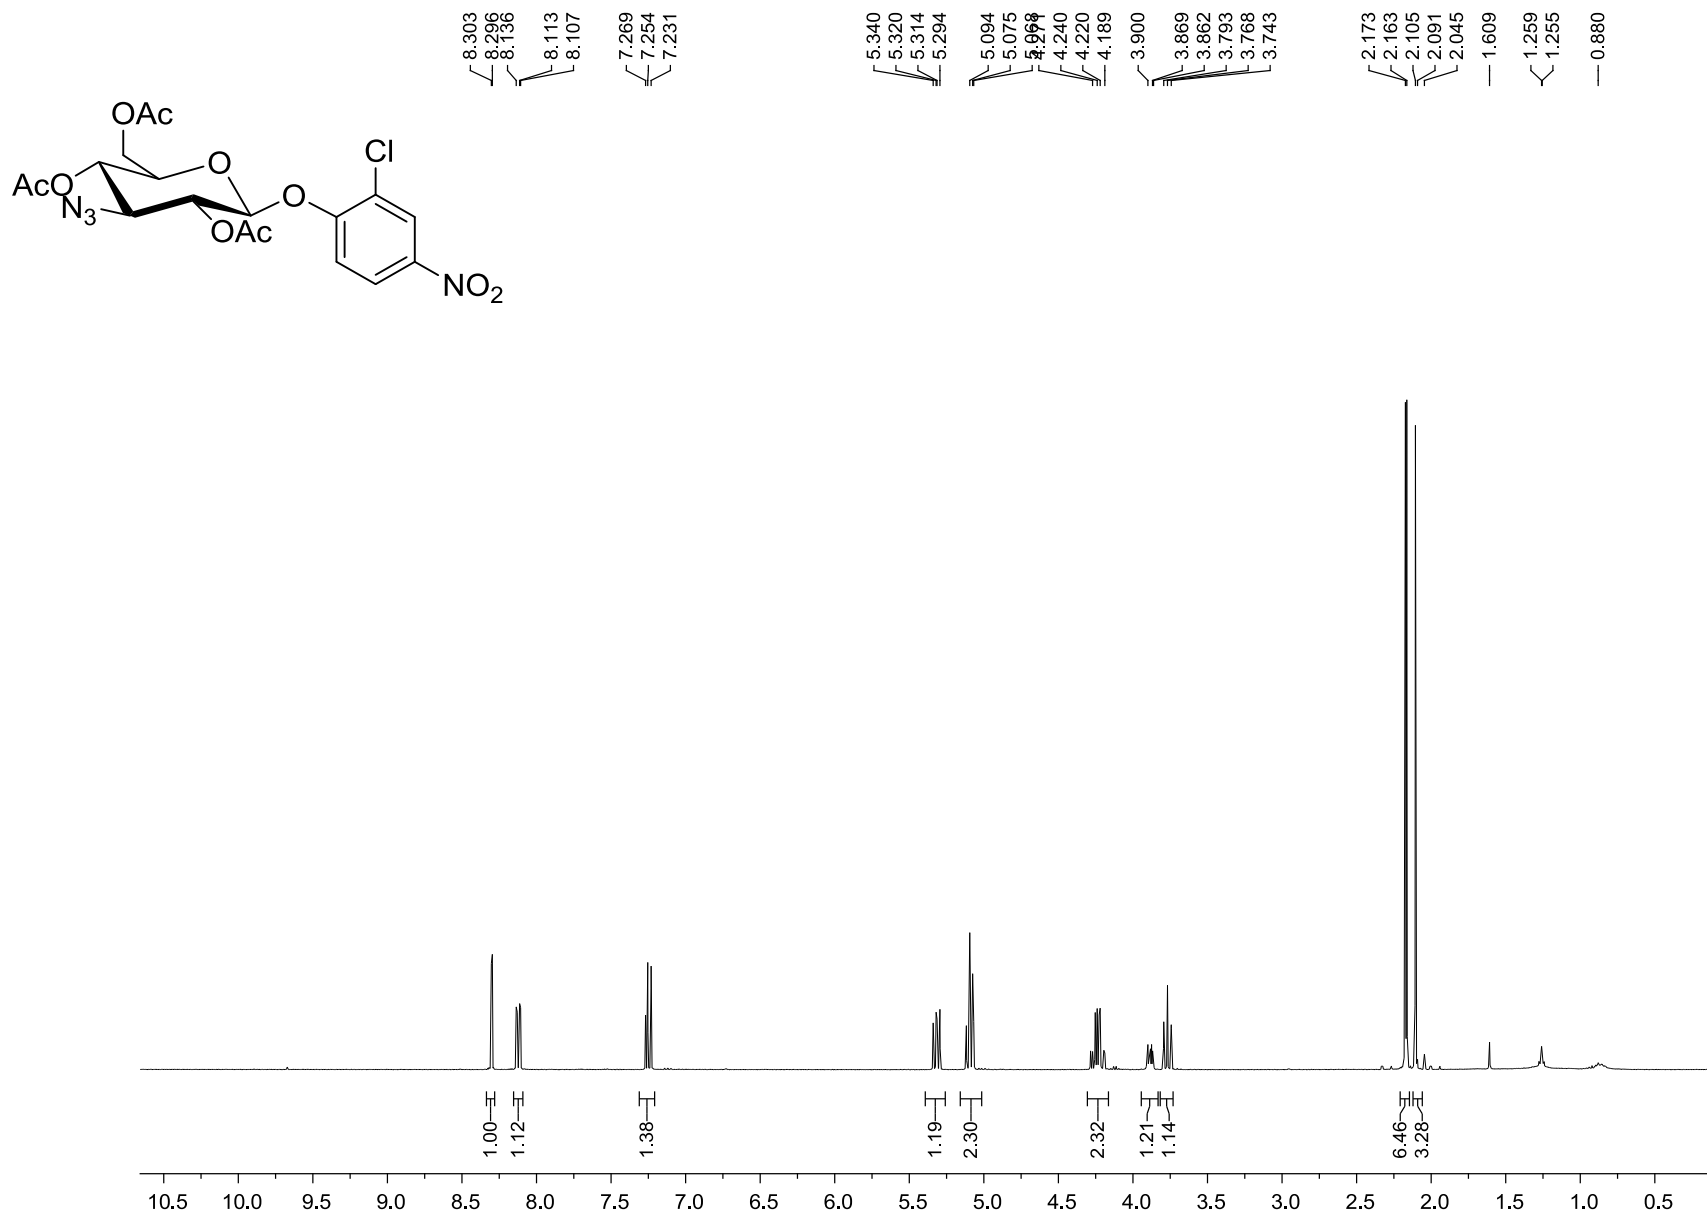

(2-chloro-4-nitrophenyl)-2,4,6-tri-O-acetyl-3-deoxy-3-azido- $\beta$ -D-glucopyranoside (**25**): gCOSY NMR ( $\text{CDCl}_3$ , 400 MHz)

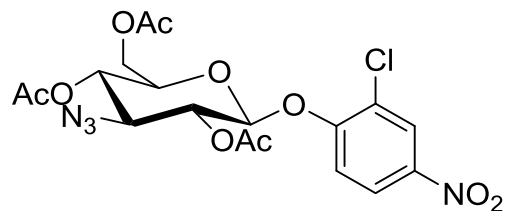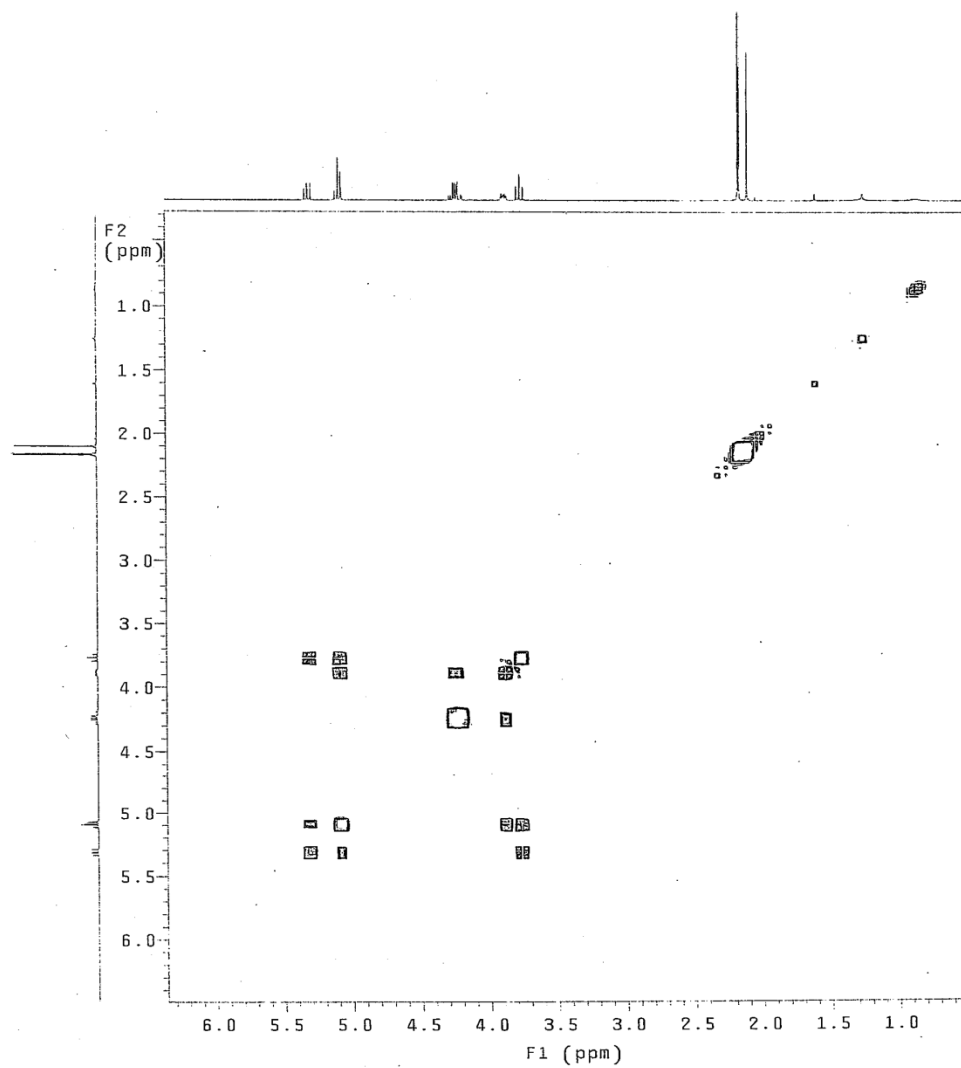

S107

(2-chloro-4-nitrophenyl)-2,4,6-tri-O-acetyl-3-deoxy-3-azido- $\beta$ -D-glucopyranoside (**25**):  $^{13}\text{C}$  NMR ( $\text{CDCl}_3$ , 100 MHz)

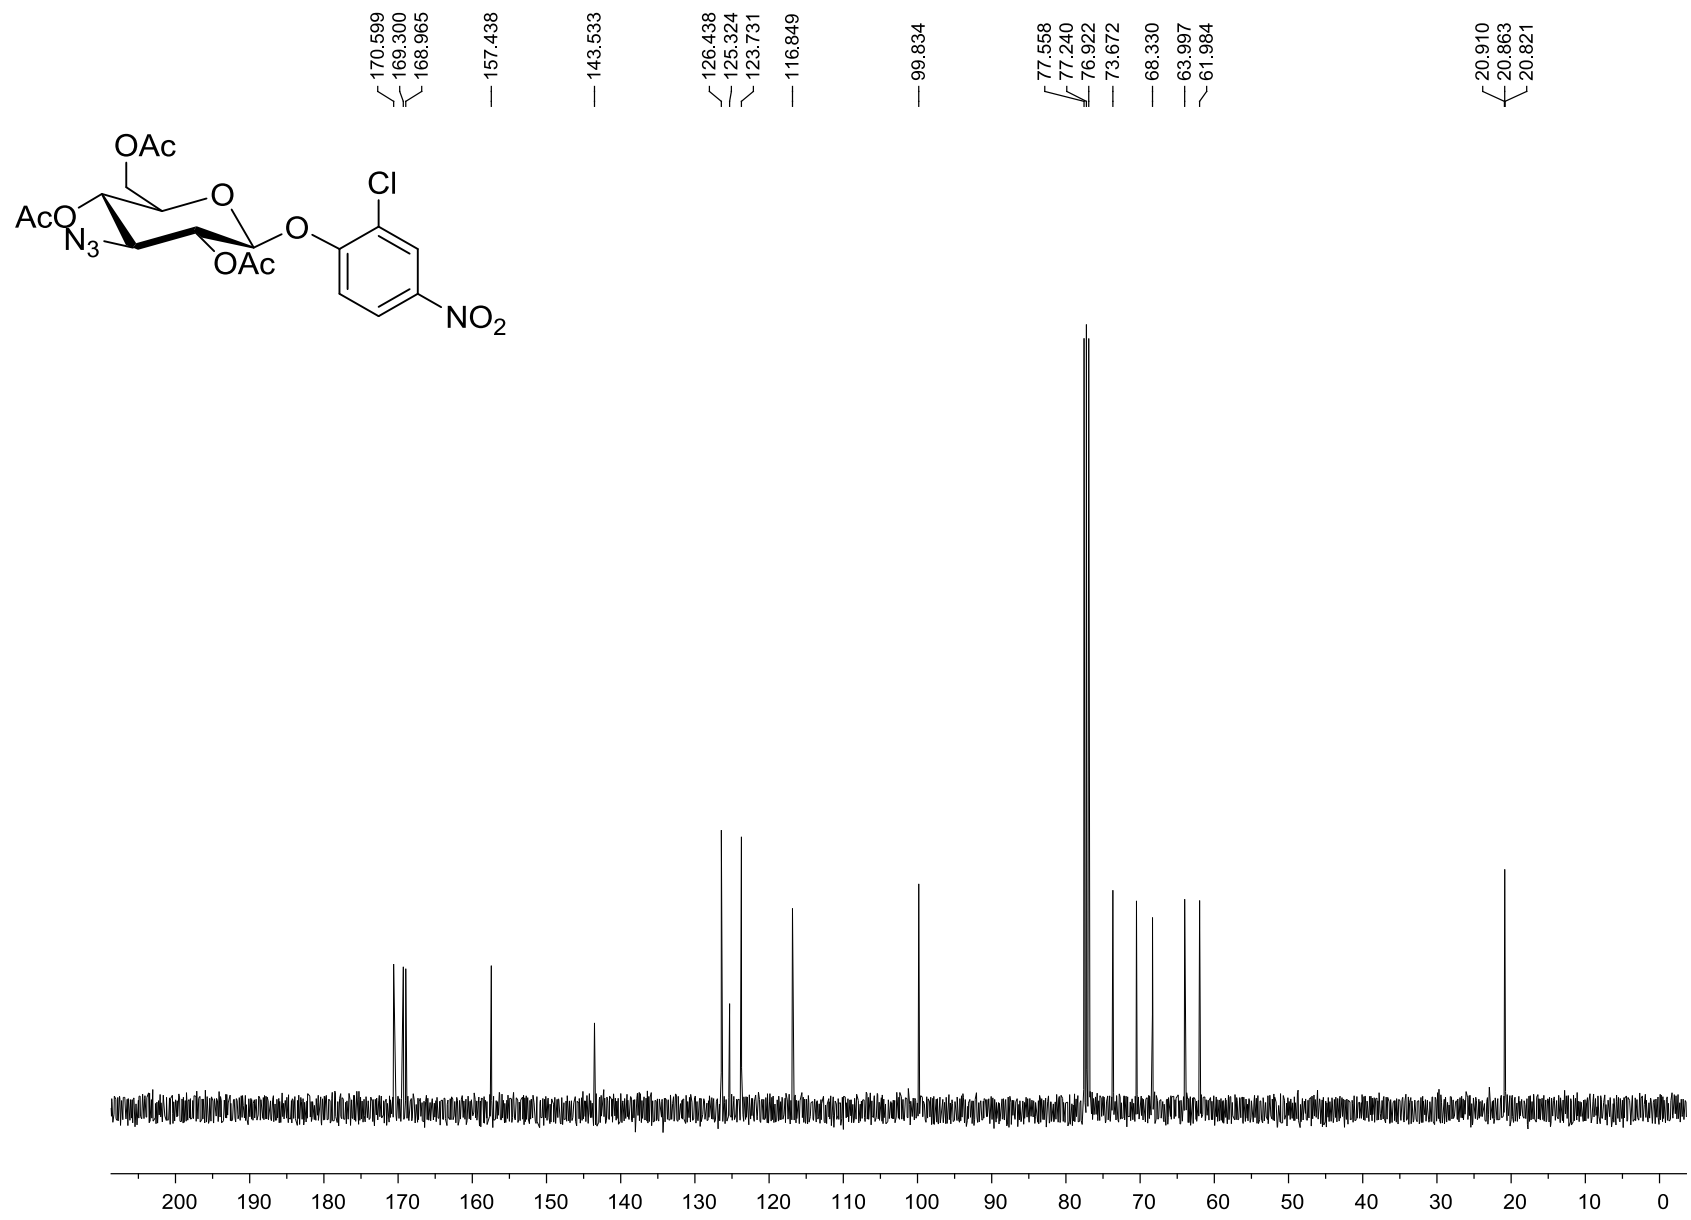



(2-chloro-4-nitrophenyl)-2,3,6-tri-O-acetyl-4-deoxy-4-azido-β-D-glucopyranoside (**27**): <sup>1</sup>H NMR (CDCl<sub>3</sub>, 500 MHz)

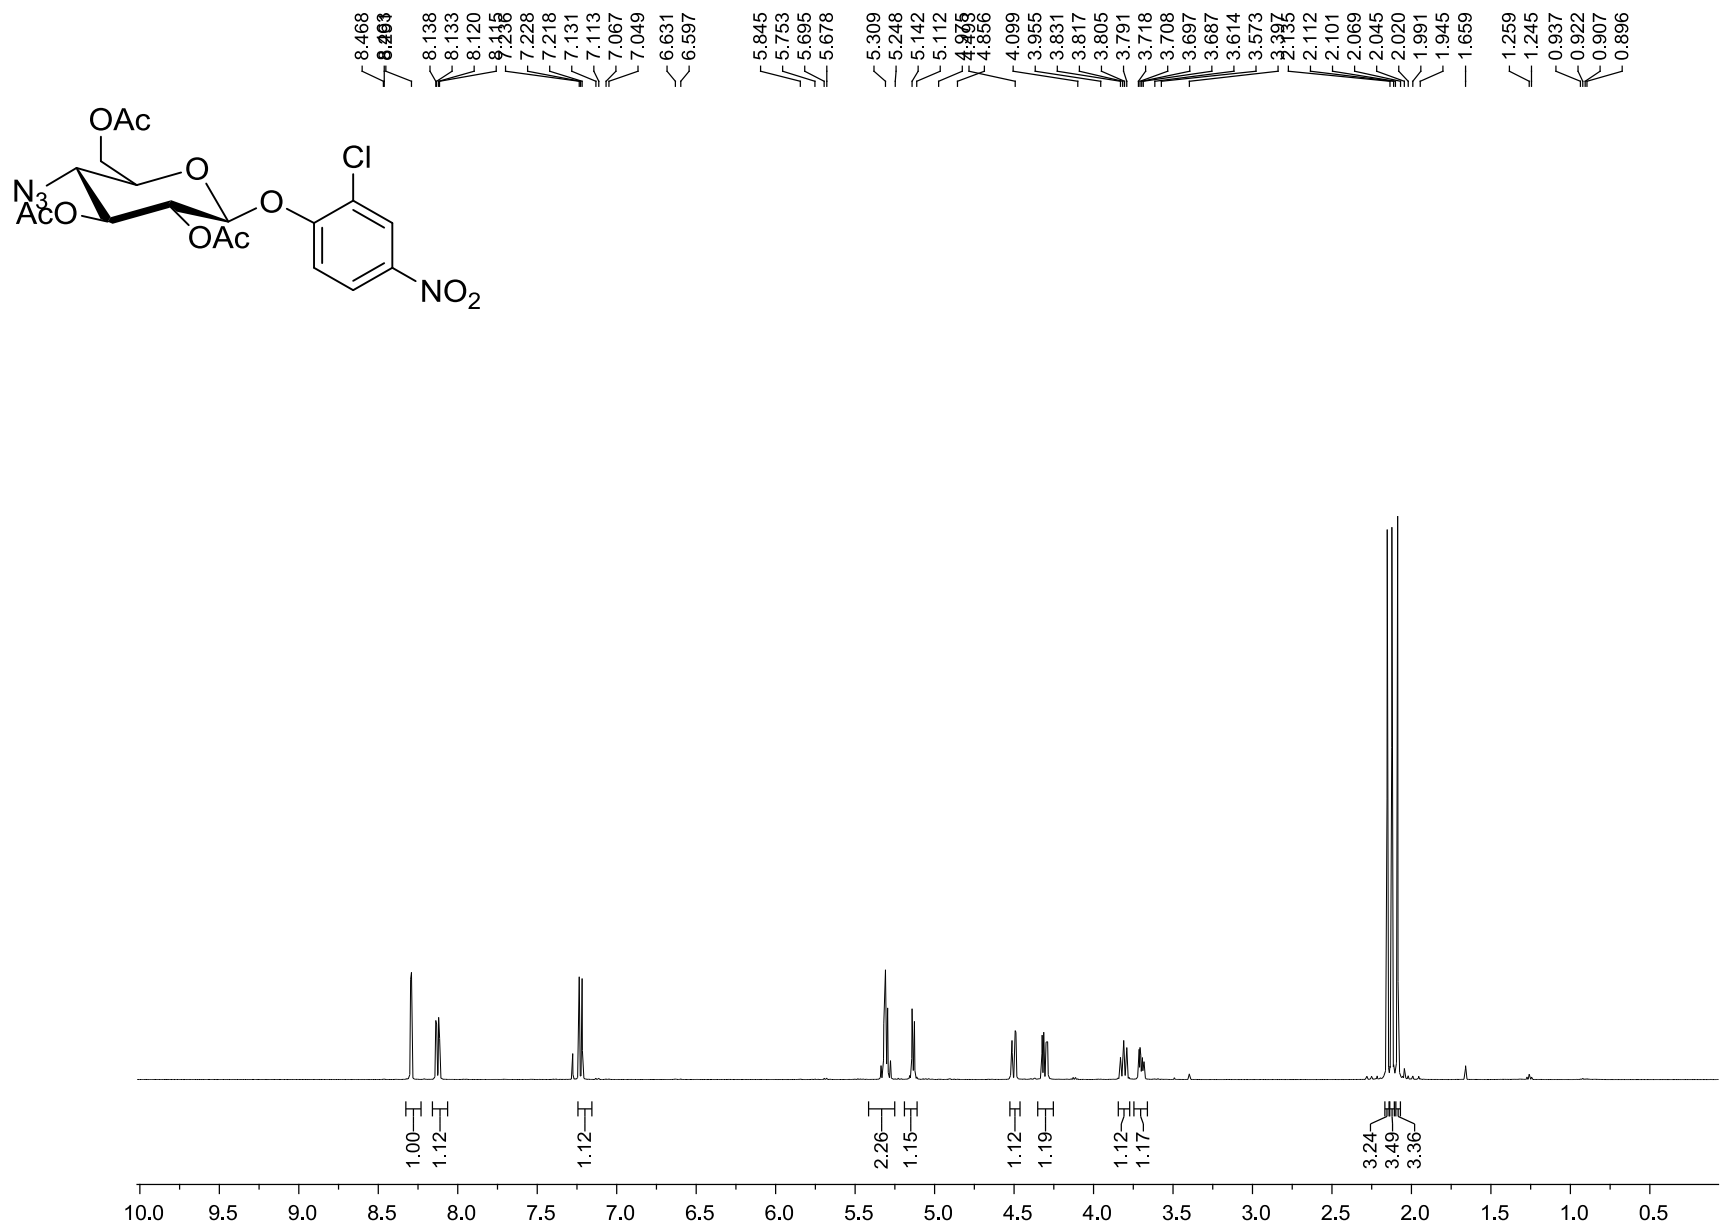

(2-chloro-4-nitrophenyl)-2,3,6-tri-O-acetyl-4-deoxy-4-azido-β-D-glucopyranoside (**27**): <sup>13</sup>C NMR (CDCl<sub>3</sub>, 500 MHz)

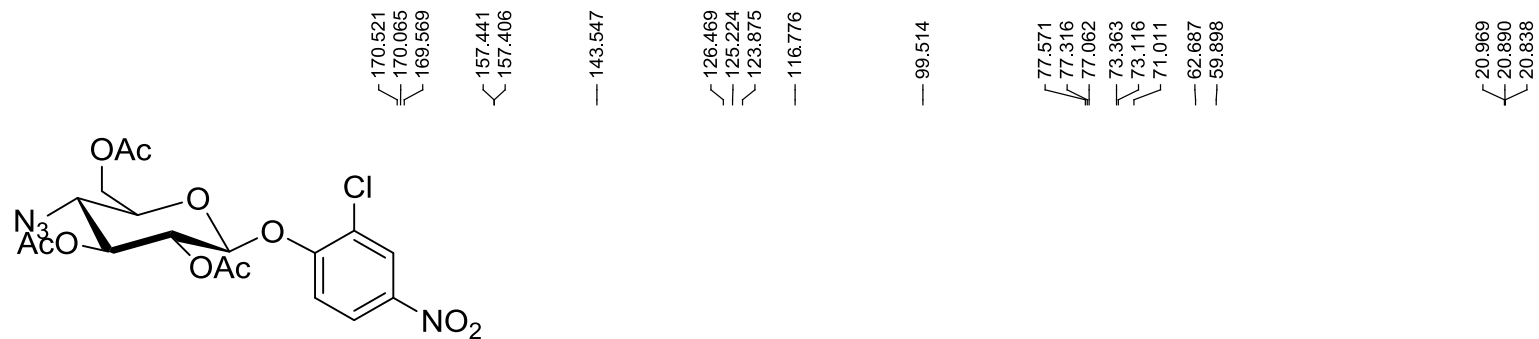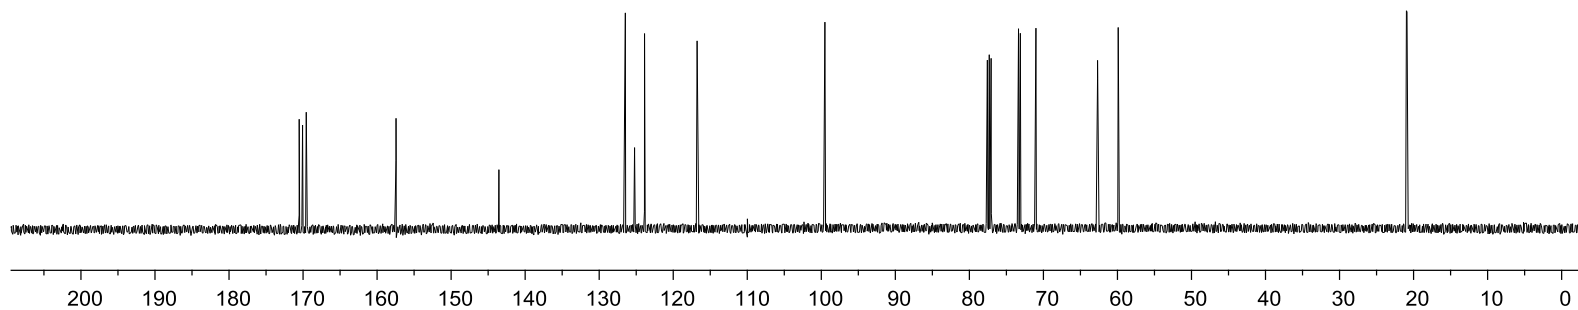

S110

1-bromo-3,4-di-O-acetyl-2-deoxy-2-azido- $\alpha$ -D-xylopyranoside (**29**):  $^1\text{H}$  NMR ( $\text{CDCl}_3$ , 400 MHz)

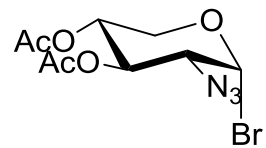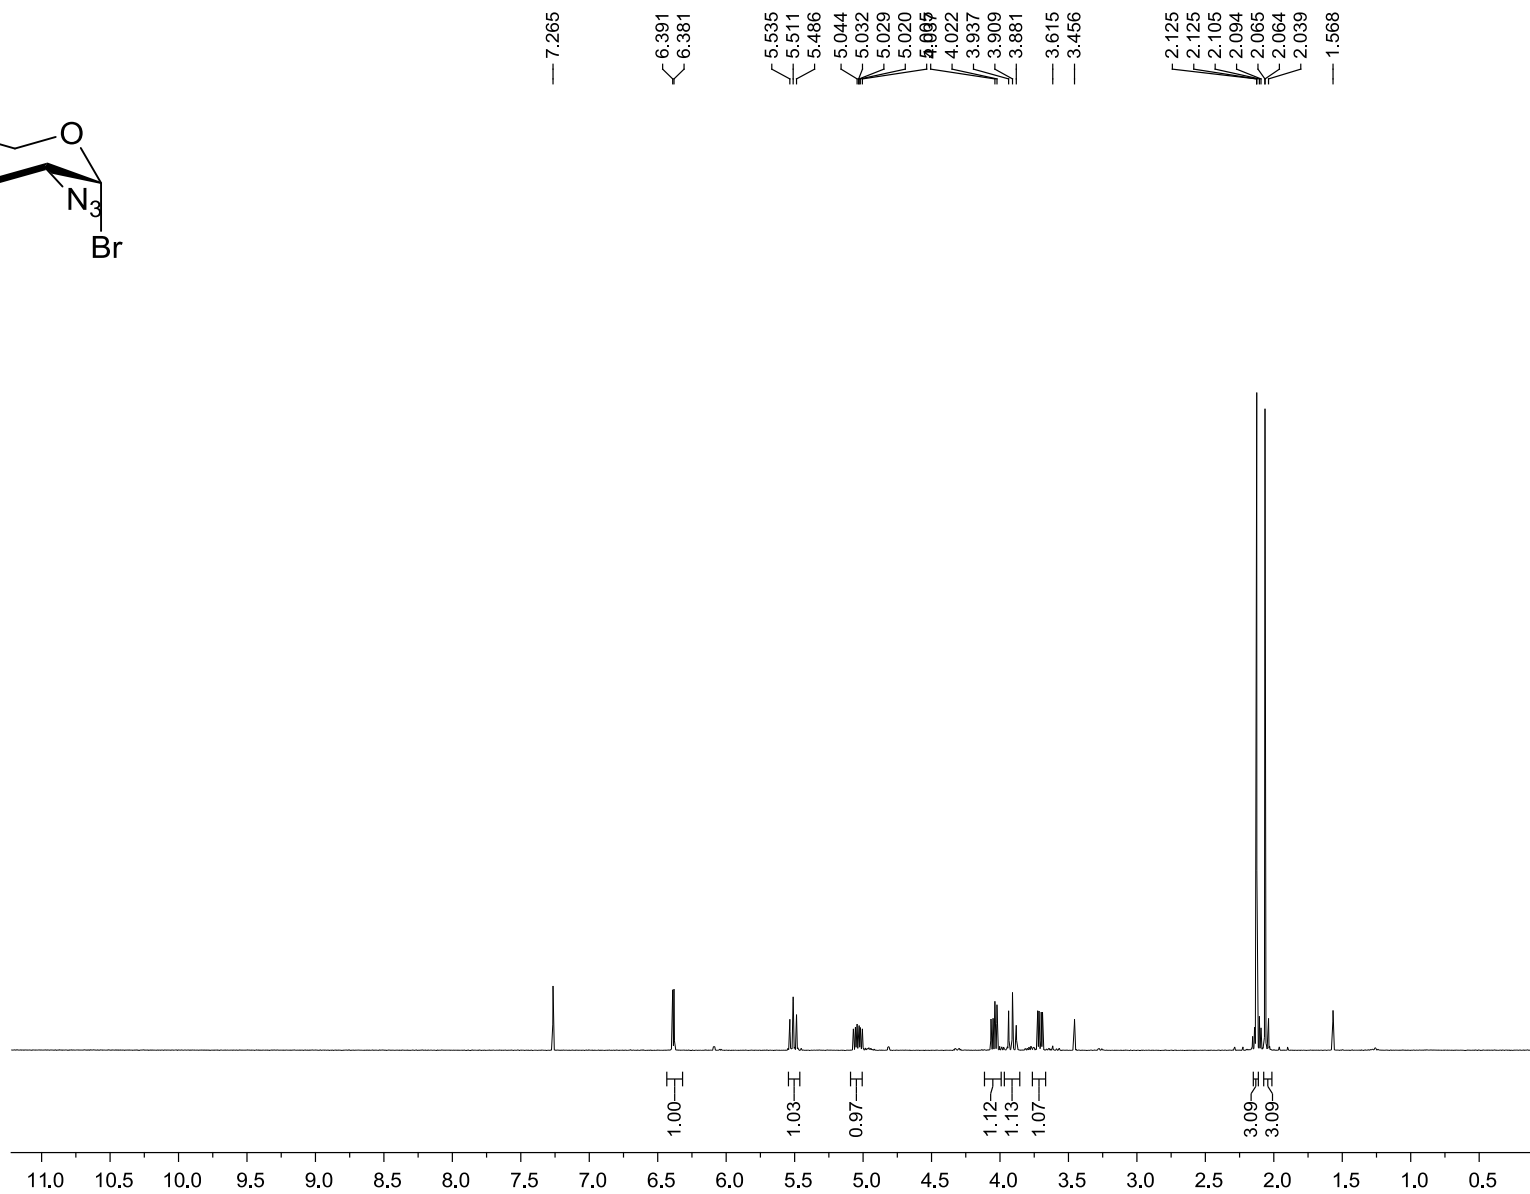

1-bromo-3,4-di-O-acetyl-2-deoxy-2-azido- $\alpha$ -D-xylopyranoside (**29**): gCOSY NMR ( $\text{CDCl}_3$ , 400 MHz)

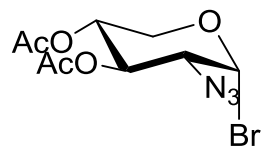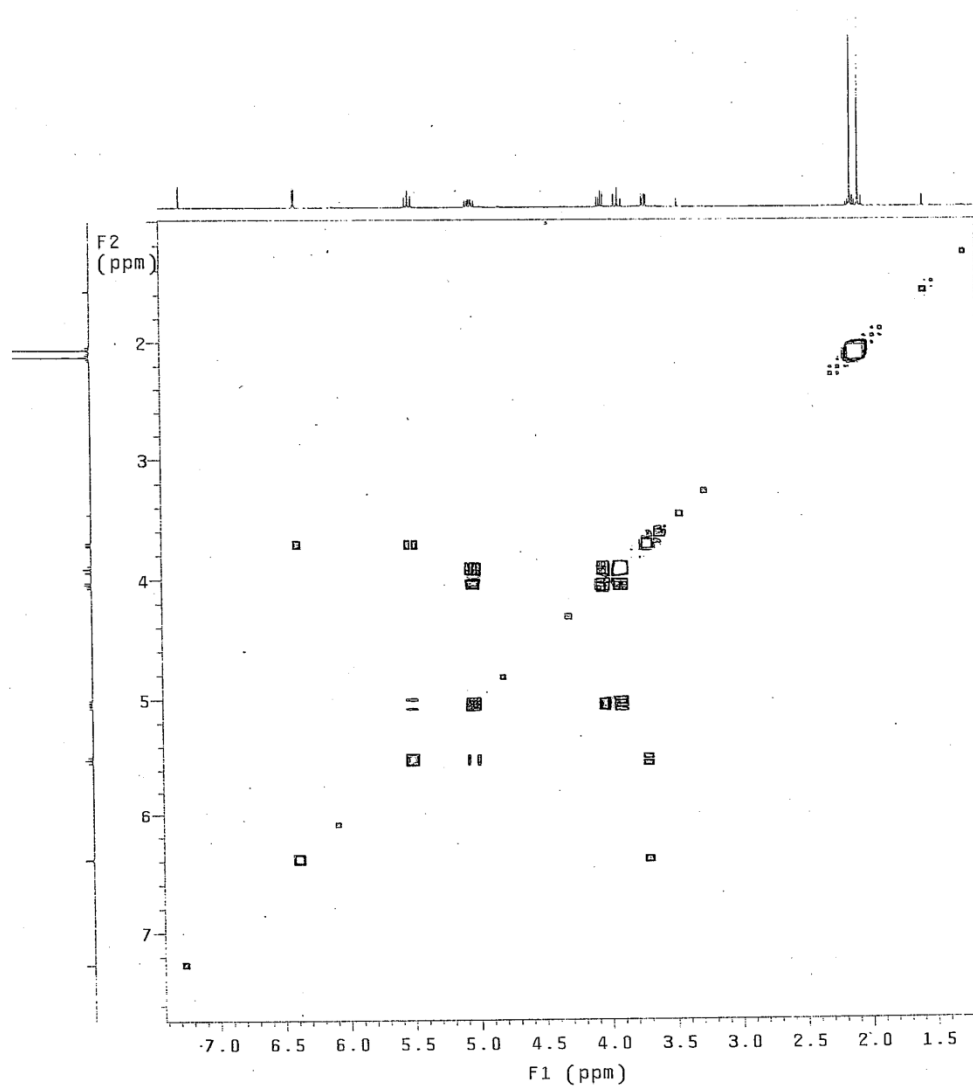

S112

1-bromo-3,4-di-O-acetyl-2-deoxy-2-azido- $\alpha$ -D-xylopyranoside (**29**):  $^{13}\text{C}$  NMR ( $\text{CDCl}_3$ , 100 MHz)

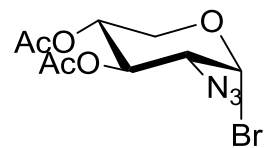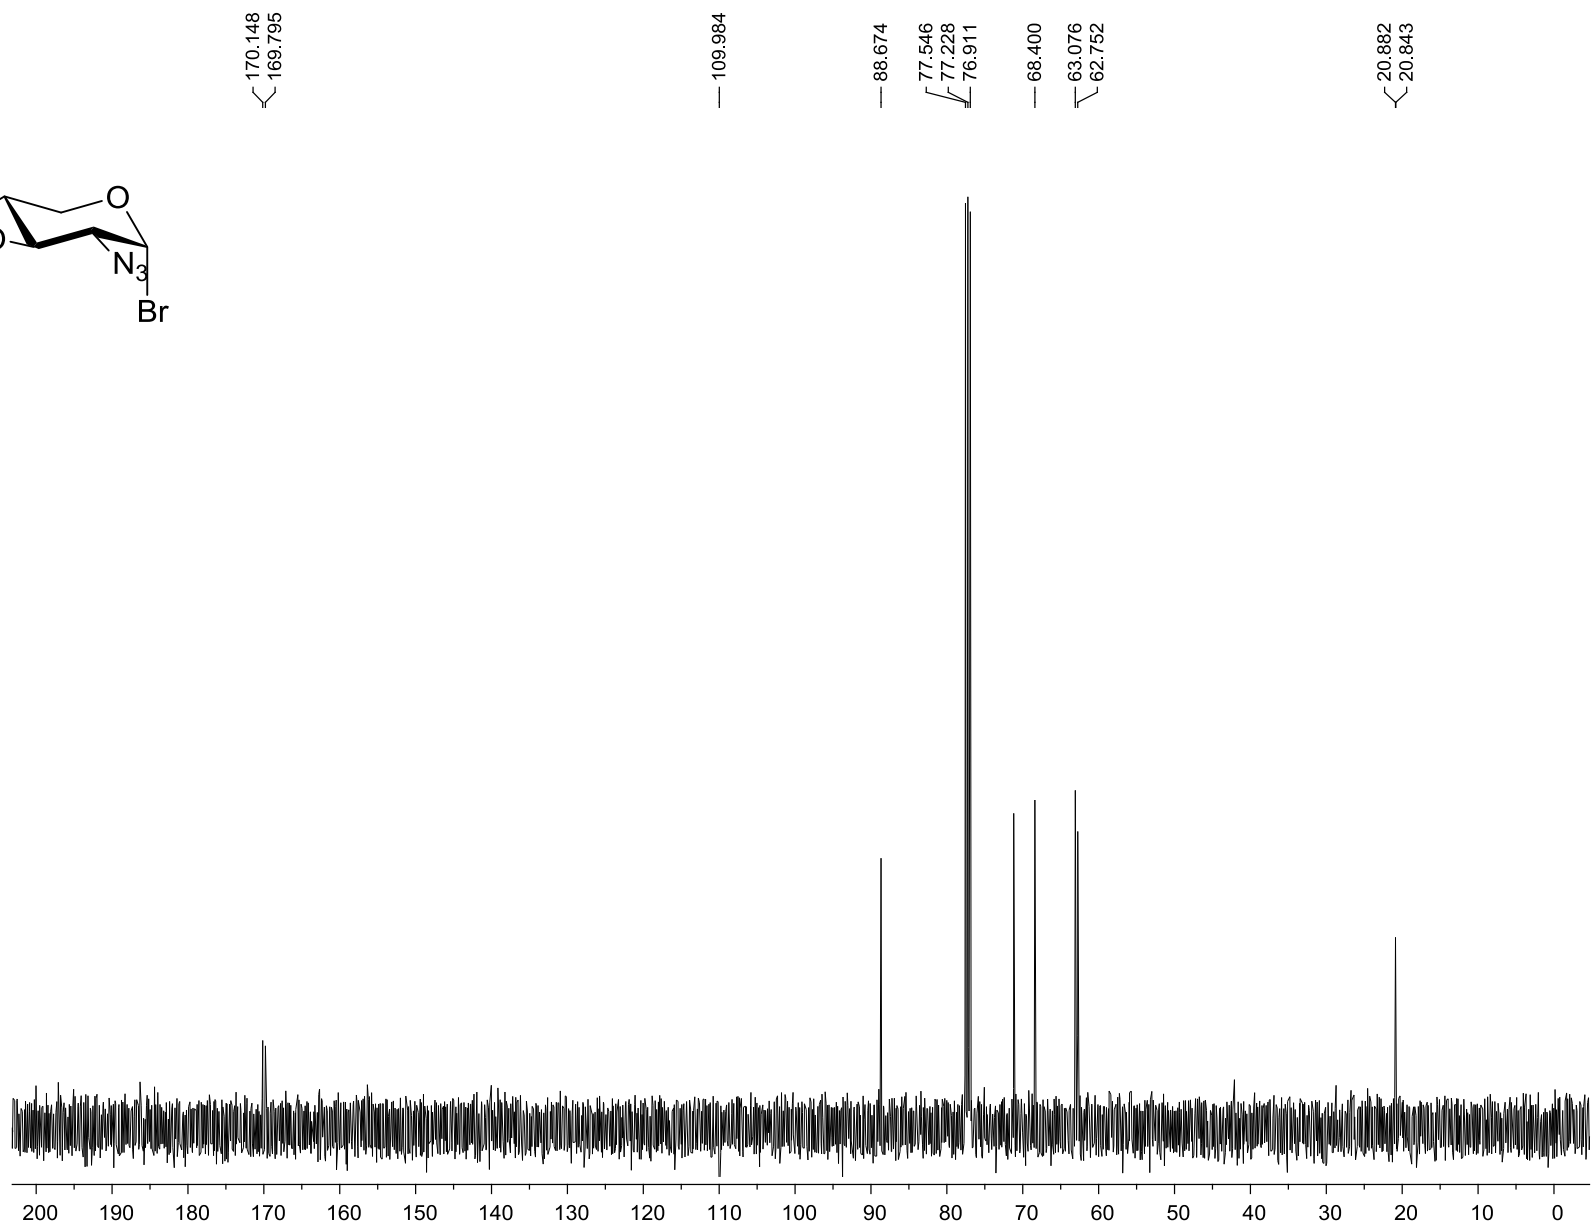

(2-chloro-4-nitrophenyl)-3,4-di-O-acetyl-2-deoxy-2-azido- $\beta$ -D-xylopyranoside (**30**):  $^1\text{H}$  NMR ( $\text{CDCl}_3$ , 400 MHz)

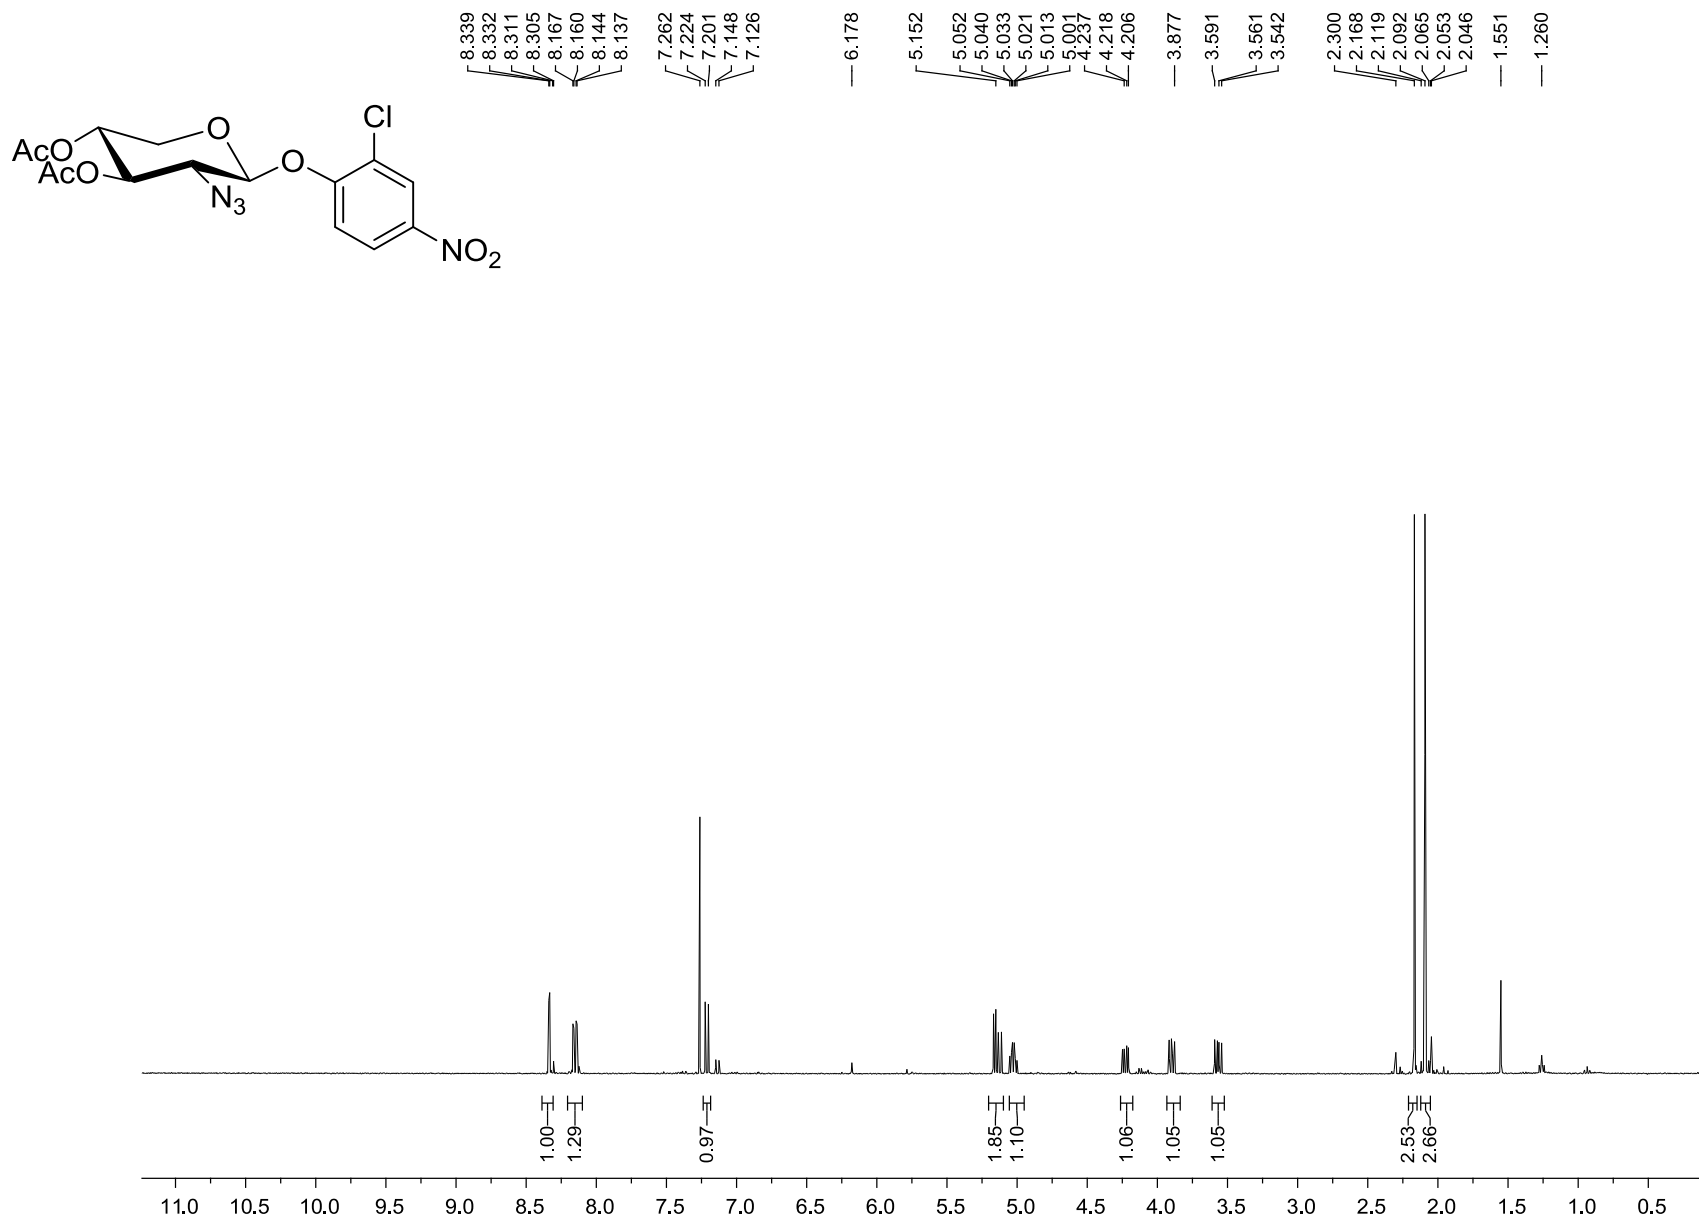

S114

(2-chloro-4-nitrophenyl)-3,4-di-O-acetyl-2-deoxy-2-azido- $\beta$ -D-xylopyranoside (**30**): gCOSY NMR ( $\text{CDCl}_3$ , 400 MHz)

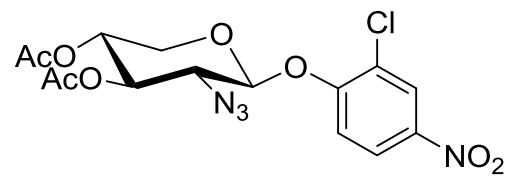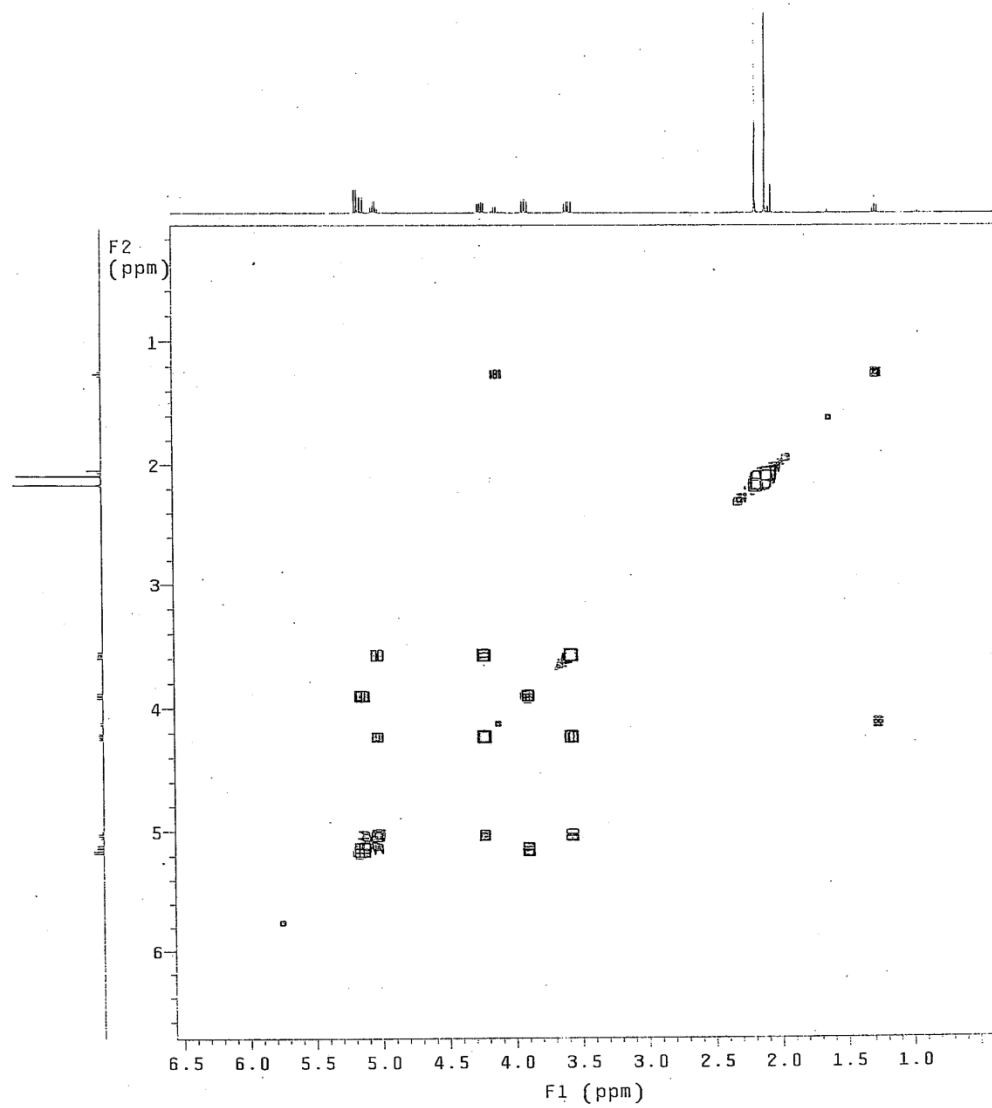

S115

(2-chloro-4-nitrophenyl)-3,4-di-O-acetyl-2-deoxy-2-azido- $\beta$ -D-xylopyranoside (**30**):  $^{13}\text{C}$  NMR ( $\text{CDCl}_3$ , 100 MHz)

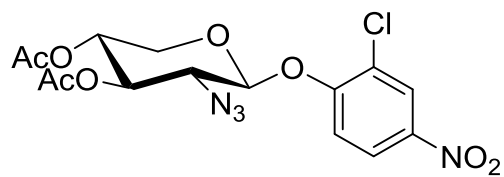

170.085  
169.892  
156.970  
143.229  
126.515  
124.795  
123.869  
115.910  
99.840  
77.563  
77.245  
76.927  
68.553  
62.811  
62.392  
21.258  
20.975  
20.911  
14.409

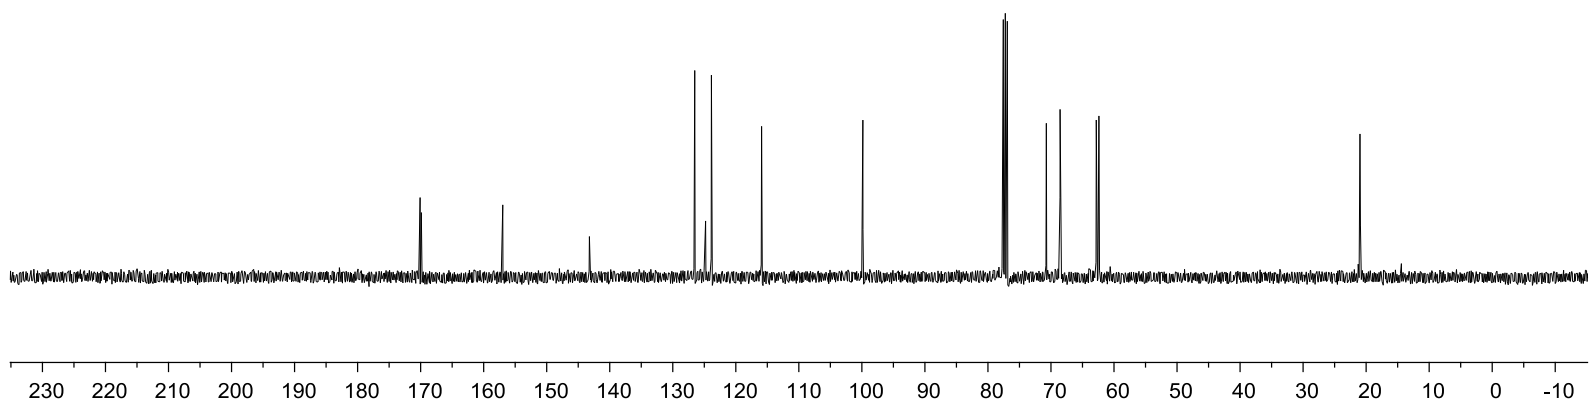

S116



1,2,3-tri-O-benzoyl- $\beta$ -L-arabinopyranoside (**31**):  $^1\text{H}$  NMR ( $\text{CDCl}_3$ , 500 MHz)

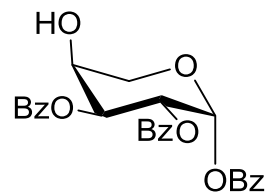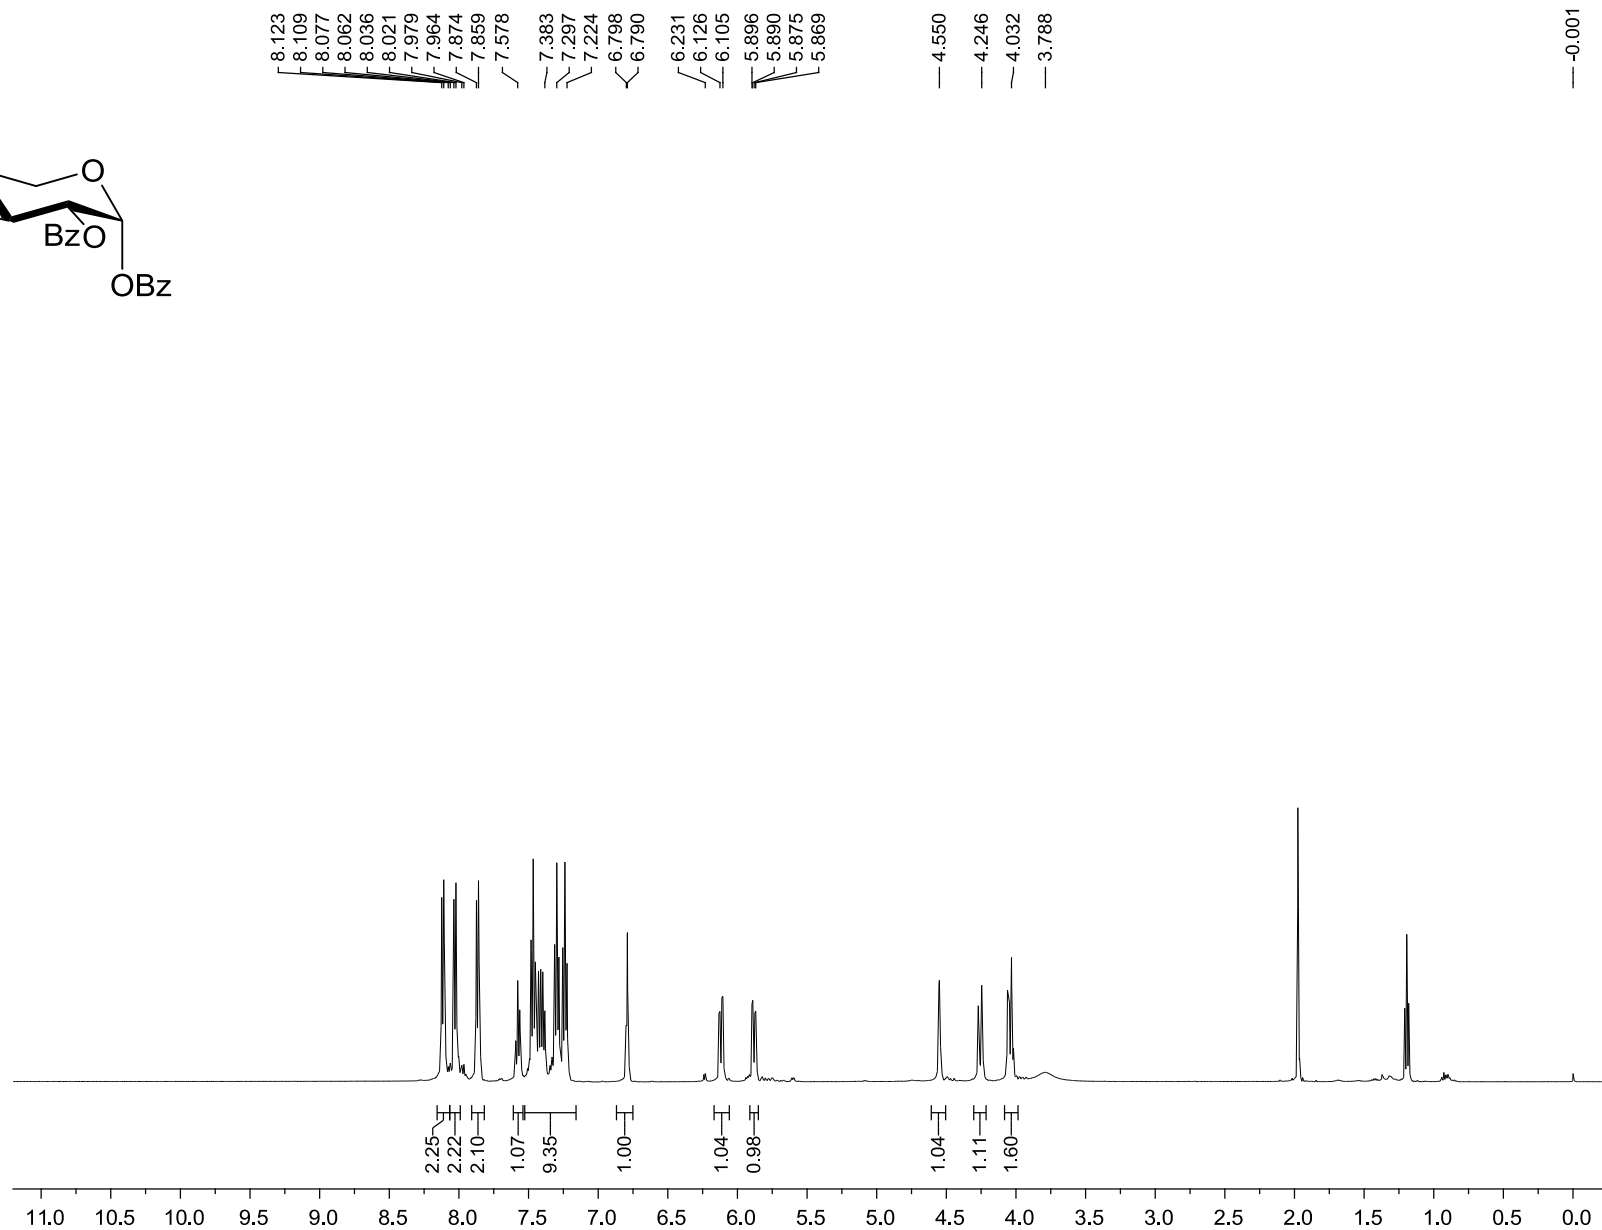

1,2,3-tri-O-benzoyl- $\beta$ -L-arabinopyranoside (**31**):  $^{13}\text{C}$  NMR ( $\text{CDCl}_3$ , 100 MHz)

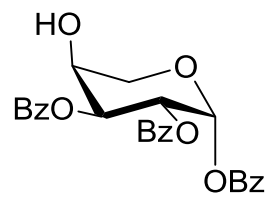

- 171.595
- 166.133
- 165.695
- 164.902
- 133.768
- 133.528
- 133.371
- 129.817
- 129.198
- 129.053
- 128.889
- 128.701
- 128.488
- 128.377
- 91.447
- 77.551
- 77.232
- 76.913
- 70.989
- 65.040
- 60.557
- 21.015
- 14.138

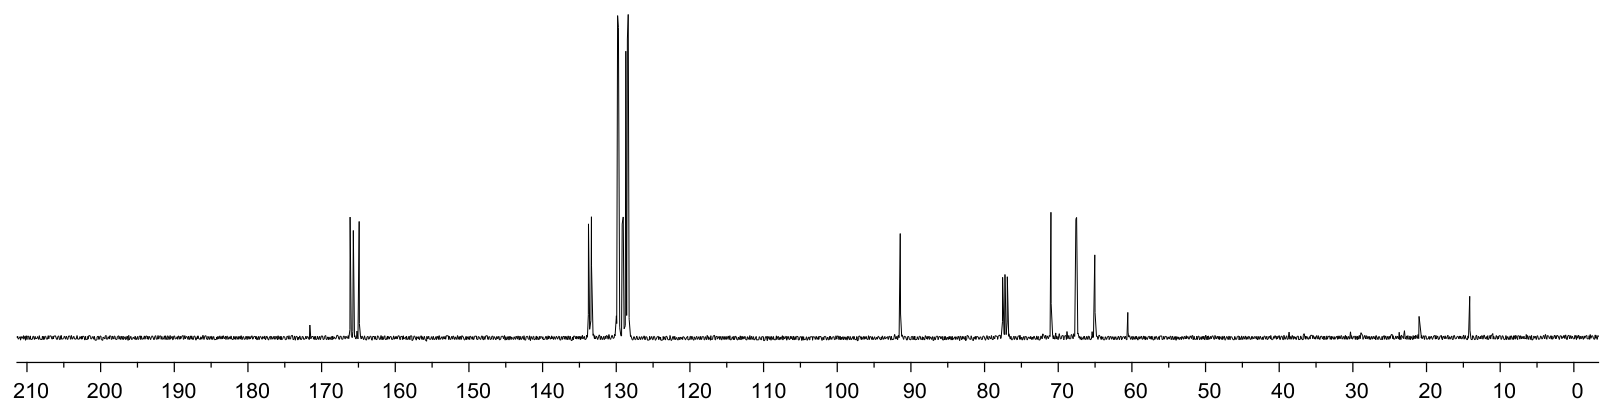



1,2,3-tri-O-benzoyl- $\beta$ -D-arabinopyranoside (**32**): gCOSY NMR ( $\text{CDCl}_3$ , 500 MHz)

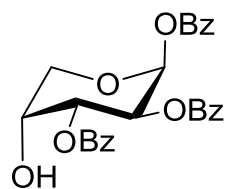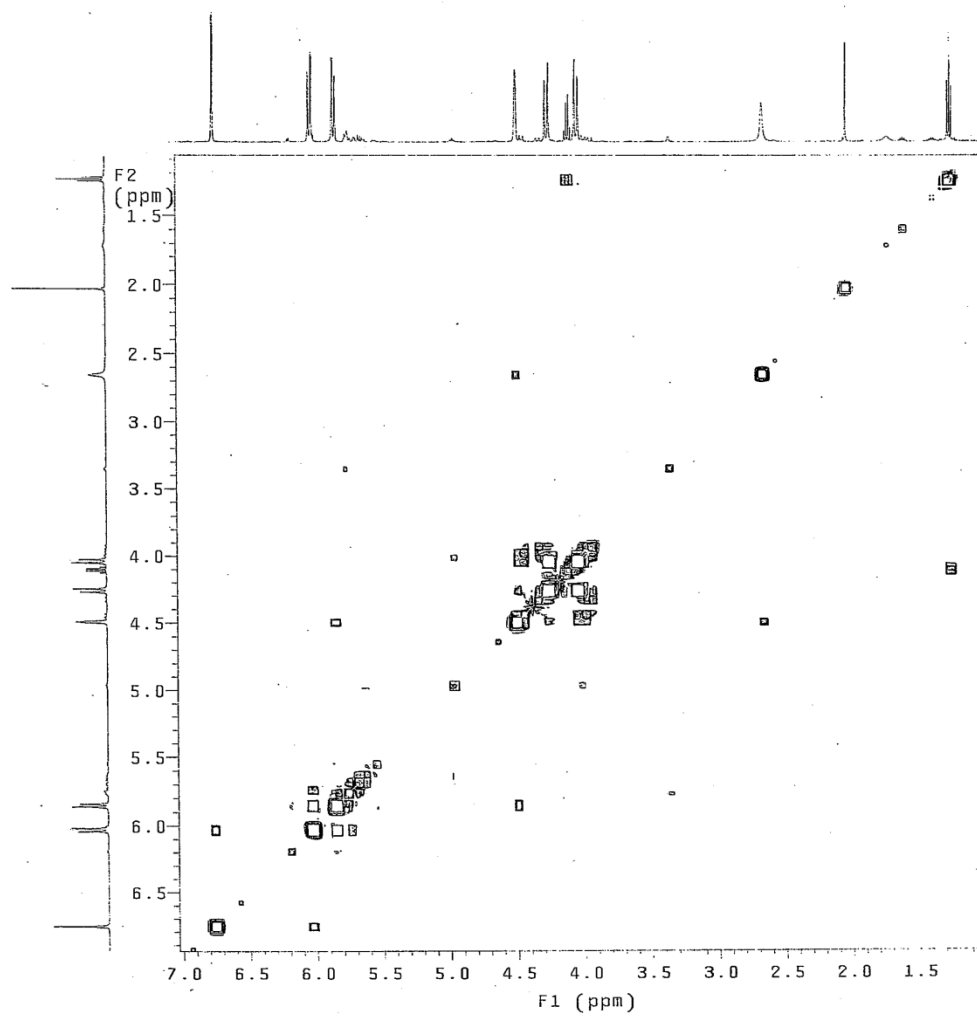

1,2,3-tri-O-benzoyl- $\beta$ -D-arabinopyranoside (**32**):  $^{13}\text{C}$  NMR ( $\text{CDCl}_3$ , 100 MHz)

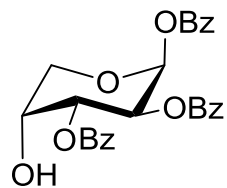

166.147  
165.794  
164.966

133.942  
133.845  
133.557  
130.096  
129.164  
128.910  
128.784  
128.681  
128.592  
128.528

91.560

77.580  
77.262  
76.944  
76.000  
64.993  
60.646

21.258  
14.405

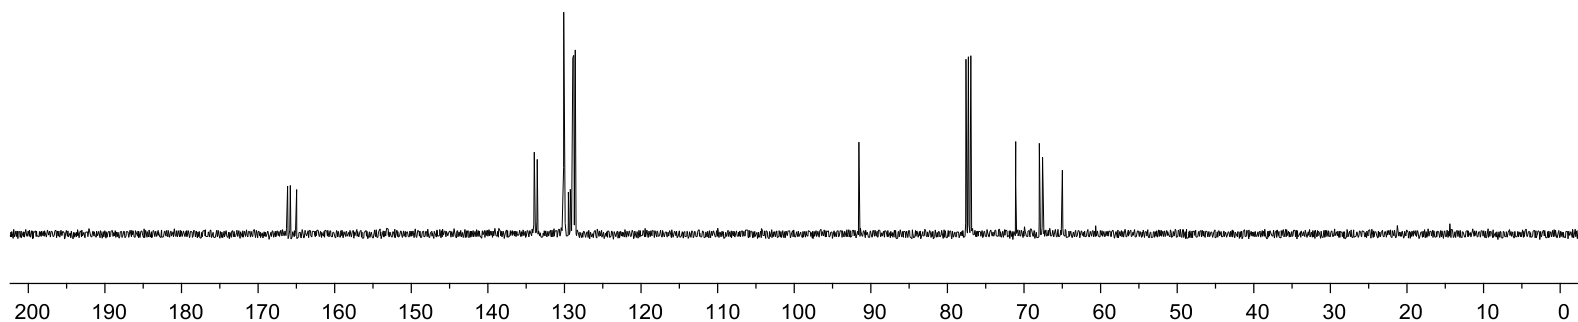

1,2,3,4-tetra-O-benzoyl- $\beta$ -L-arabinopyranoside (**33**):  $^1\text{H}$  NMR ( $\text{CDCl}_3$ , 500 MHz)

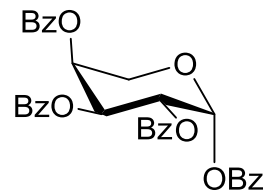

8.281  
8.046  
8.015  
7.879  
7.421  
7.406  
7.359  
7.260  
7.115  
7.097  
6.277  
6.266  
5.954  
5.805  
4.432  
4.166  
4.142

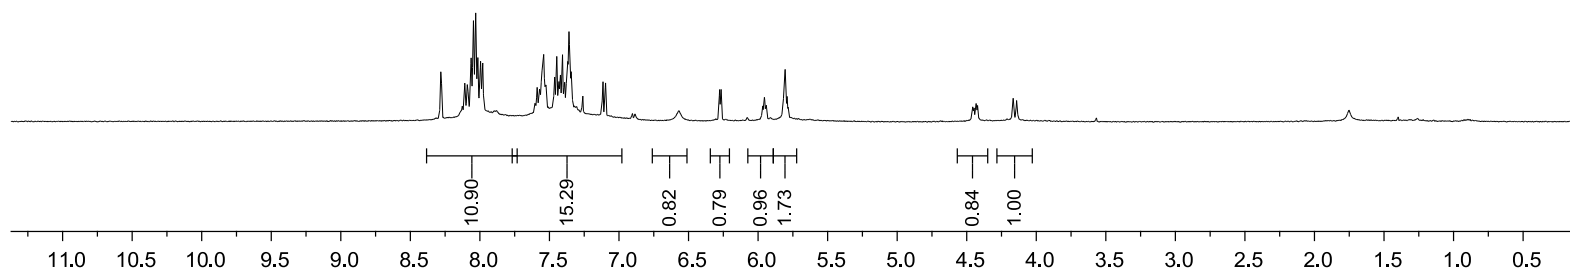

1,2,3,4-tetra-O-benzoyl- $\beta$ -L-arabinopyranoside (**33**):  $^{13}\text{C}$  NMR ( $\text{CDCl}_3$ , 100 MHz)

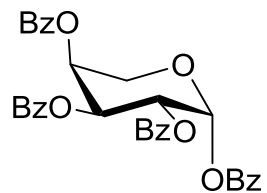

|         |         |        |        |        |
|---------|---------|--------|--------|--------|
| 165.600 | 133.758 | 92.344 | 77.332 | 69.847 |
| 165.501 | 133.645 | —      | 77.014 | 68.831 |
| 165.153 | 133.549 | —      | 76.696 | 67.491 |
| 164.783 | 128.464 | —      | —      | —      |
| 156.937 | 125.353 | —      | —      | —      |
| —       | 124.531 | —      | —      | —      |
| —       | 116.228 | —      | —      | —      |

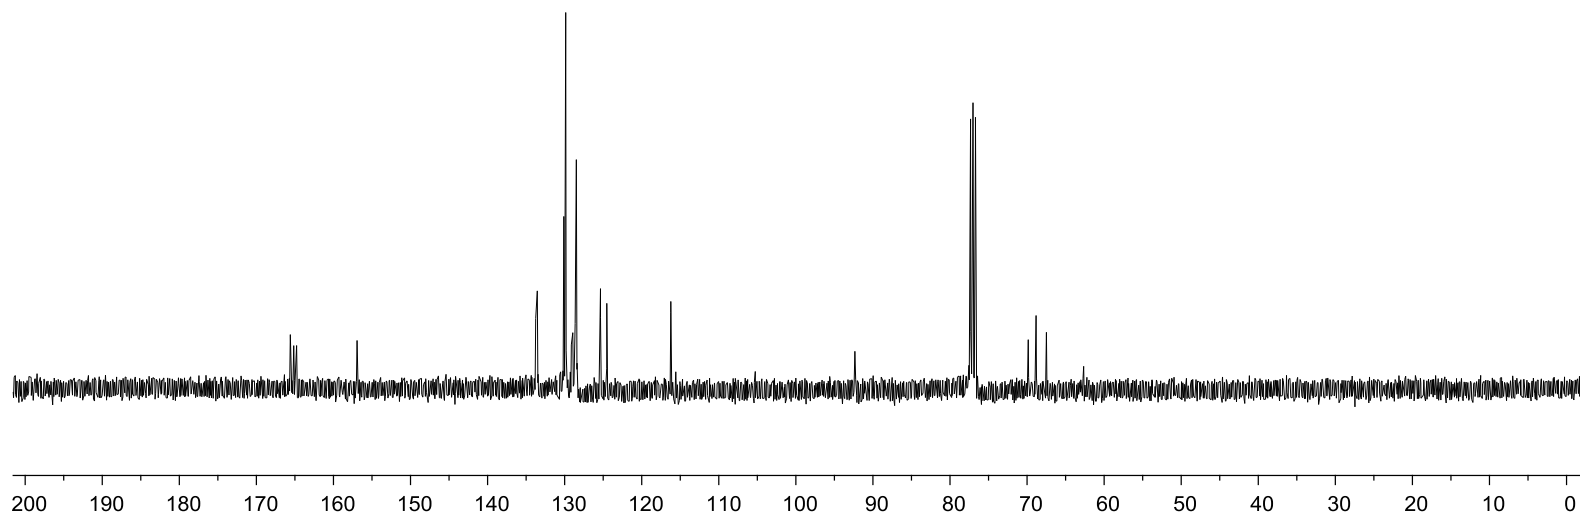

1,2,3,4-tetra-O-benzoyl- $\alpha$ -D-arabinopyranoside (**34**):  $^1\text{H}$  NMR ( $\text{CDCl}_3$ , 400 MHz)

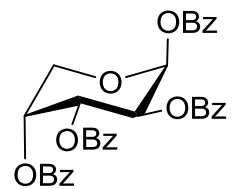

8.163  
8.161  
8.153  
8.151  
8.144  
8.140  
8.134  
8.130  
— 7.890  
7.576  
7.465  
7.409  
— 7.238  
6.954  
6.948  
6.921  
6.170  
6.164  
6.144  
6.141  
6.137  
6.117  
6.110  
5.966  
4.472  
4.441  
4.234  
4.229  
4.200  
4.195

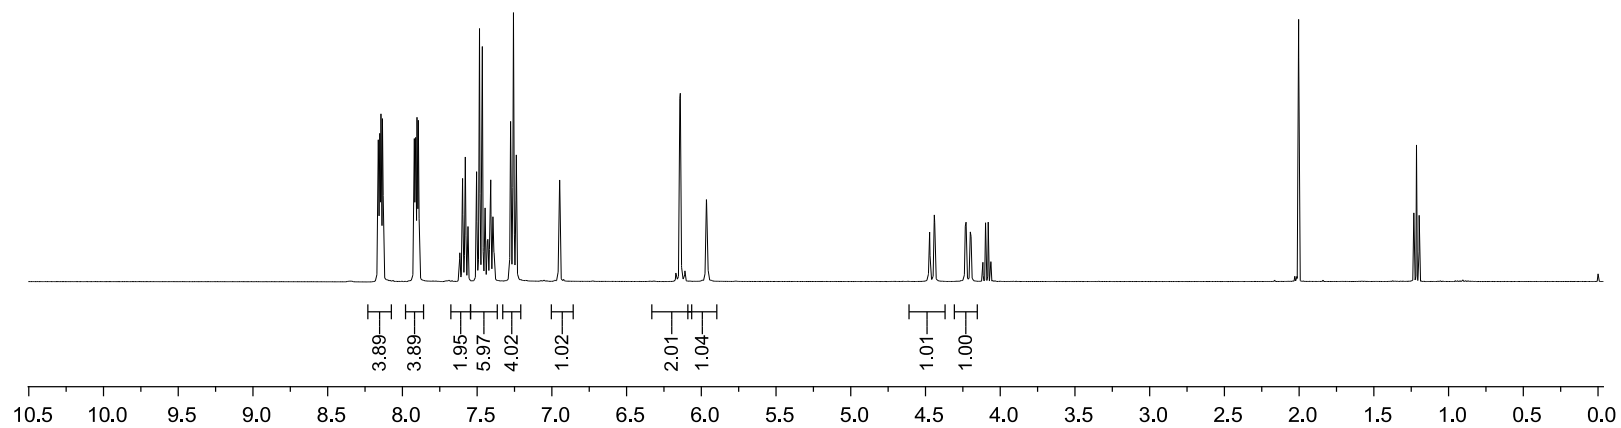



1,2,3,4-tetra-O-benzoyl- $\alpha$ -D-arabinopyranoside (**34**): gCOSY NMR (CDCl<sub>3</sub>, 400 MHz)

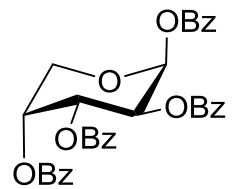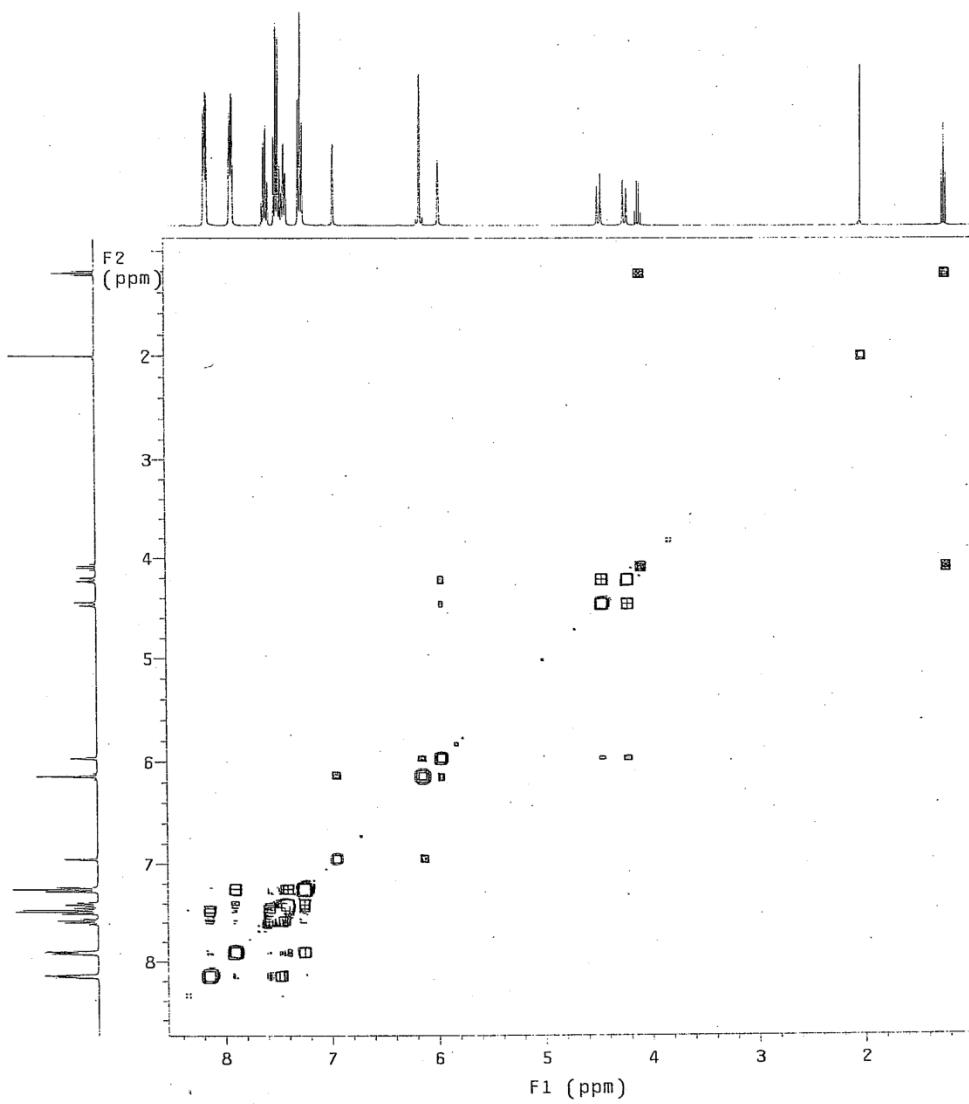

1,2,3,4-tetra-O-benzoyl- $\alpha$ -D-arabinopyranoside (**34**):  $^{13}\text{C}$  NMR ( $\text{CDCl}_3$ , 100 MHz)

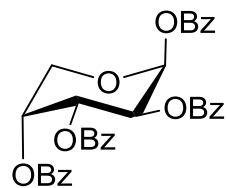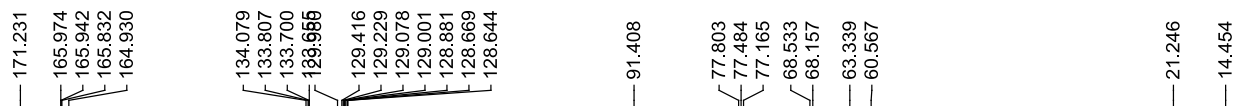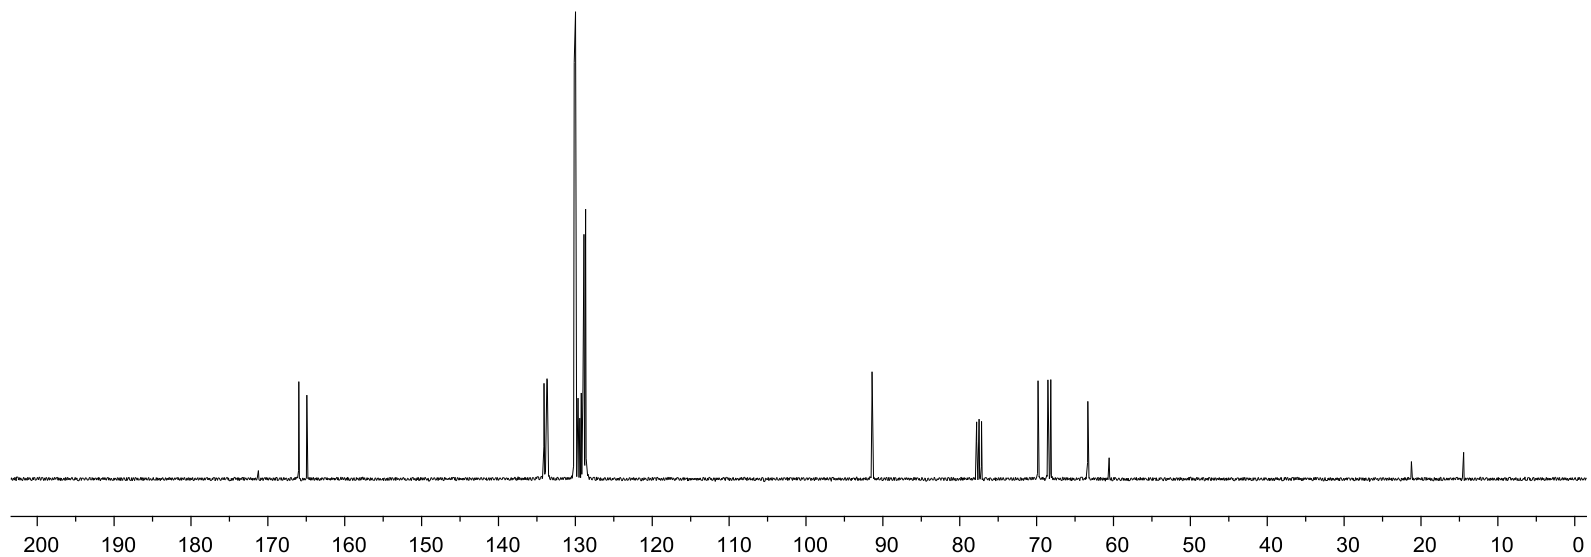

1,2,3-tri-O-benzoyl-4-deoxy-4-azido- $\alpha$ -D-xylopyranoside (**35**):  $^1\text{H}$  NMR ( $\text{CDCl}_3$ , 500 MHz)

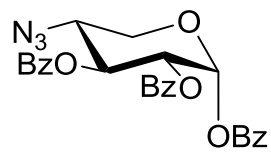

8.132  
8.118  
8.116  
8.049  
8.034  
8.032  
7.985  
7.971  
7.897  
7.882  
7.881  
7.547  
7.459  
7.381  
7.261  
6.730  
6.723  
6.058  
6.038  
6.019  
5.665  
5.539  
5.532  
5.519  
5.511  
4.133  
4.119  
4.108  
4.093  
4.077  
4.065  
3.936  
3.925  
3.910  
3.884

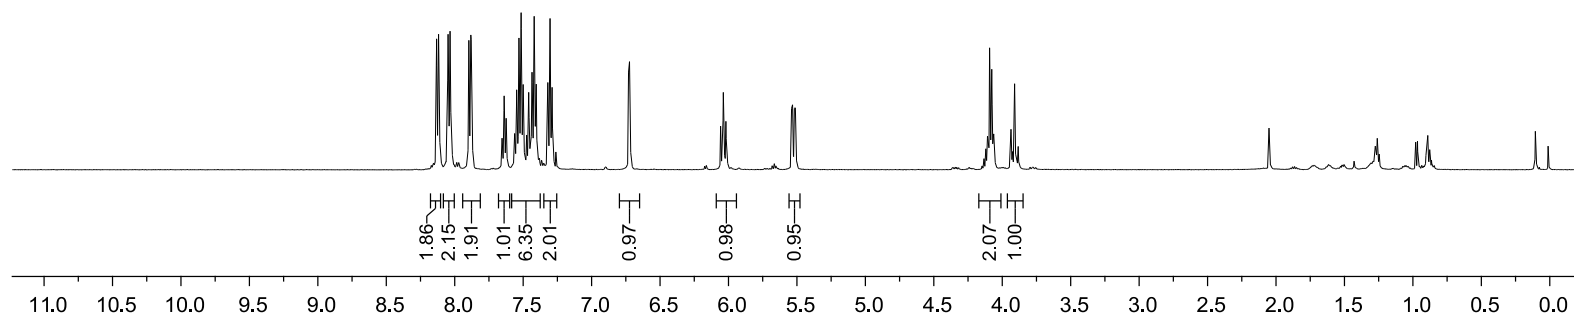

1,2,3-tri-O-benzoyl-4-deoxy-4-azido- $\alpha$ -D-xylopyranoside (**35**):  $^{13}\text{C}$  NMR ( $\text{CDCl}_3$ , 100 MHz)

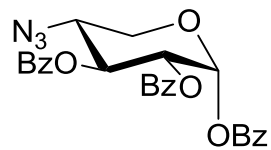

165.691  
165.421  
164.529

133.943  
133.645  
133.546  
130.087  
129.946  
129.817  
128.806  
128.769  
128.550  
128.437  
128.416

90.168

77.395  
77.077  
76.759

70.991  
70.350

61.946  
59.434

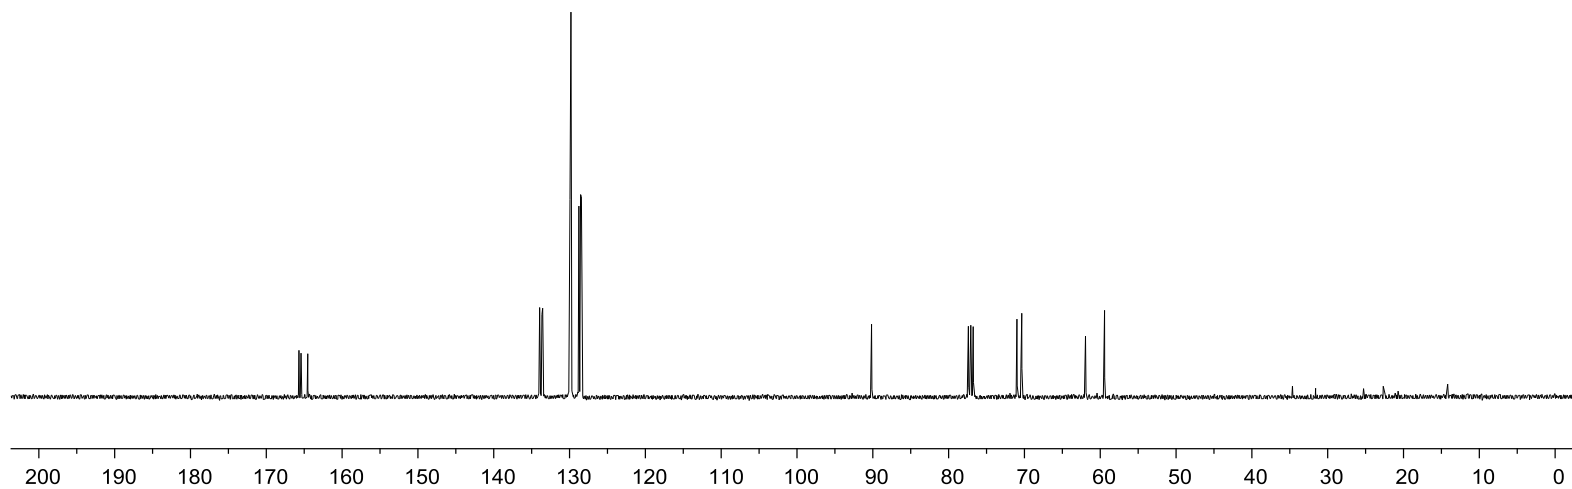

1,2,3-tri-O-benzoyl-4-deoxy-4-azido- $\alpha$ -L-xylopyranoside (**36**):  $^1\text{H}$  NMR ( $\text{CDCl}_3$ , 500 MHz)

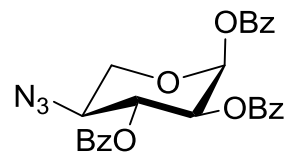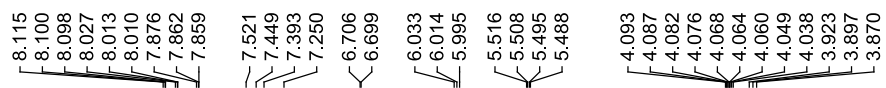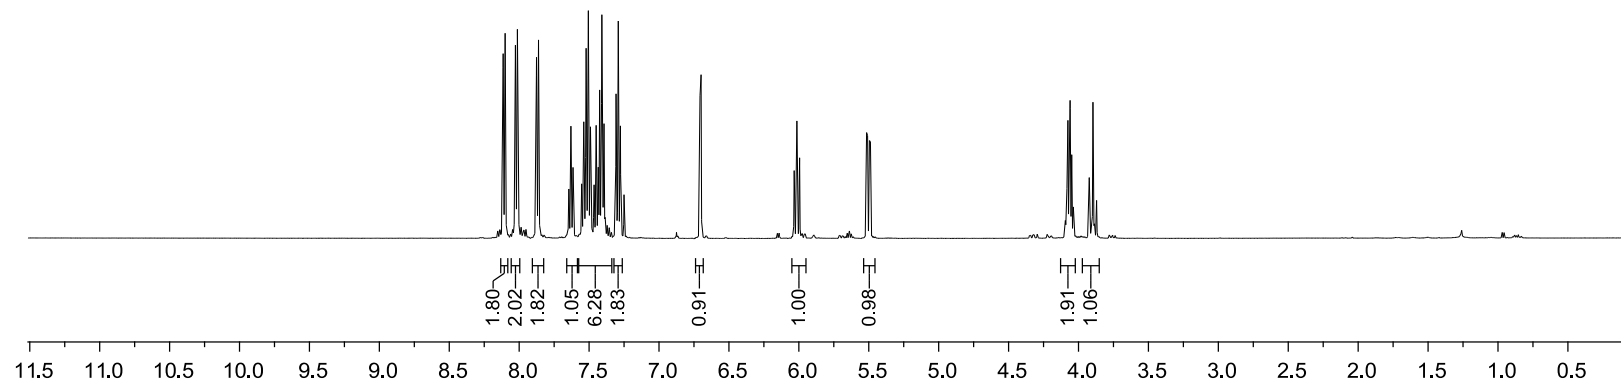

1,2,3-tri-O-benzoyl-4-deoxy-4-azido- $\alpha$ -L-xylopyranoside (**36**): gCOSY NMR ( $\text{CDCl}_3$ , 500 MHz)

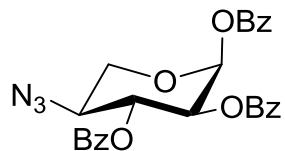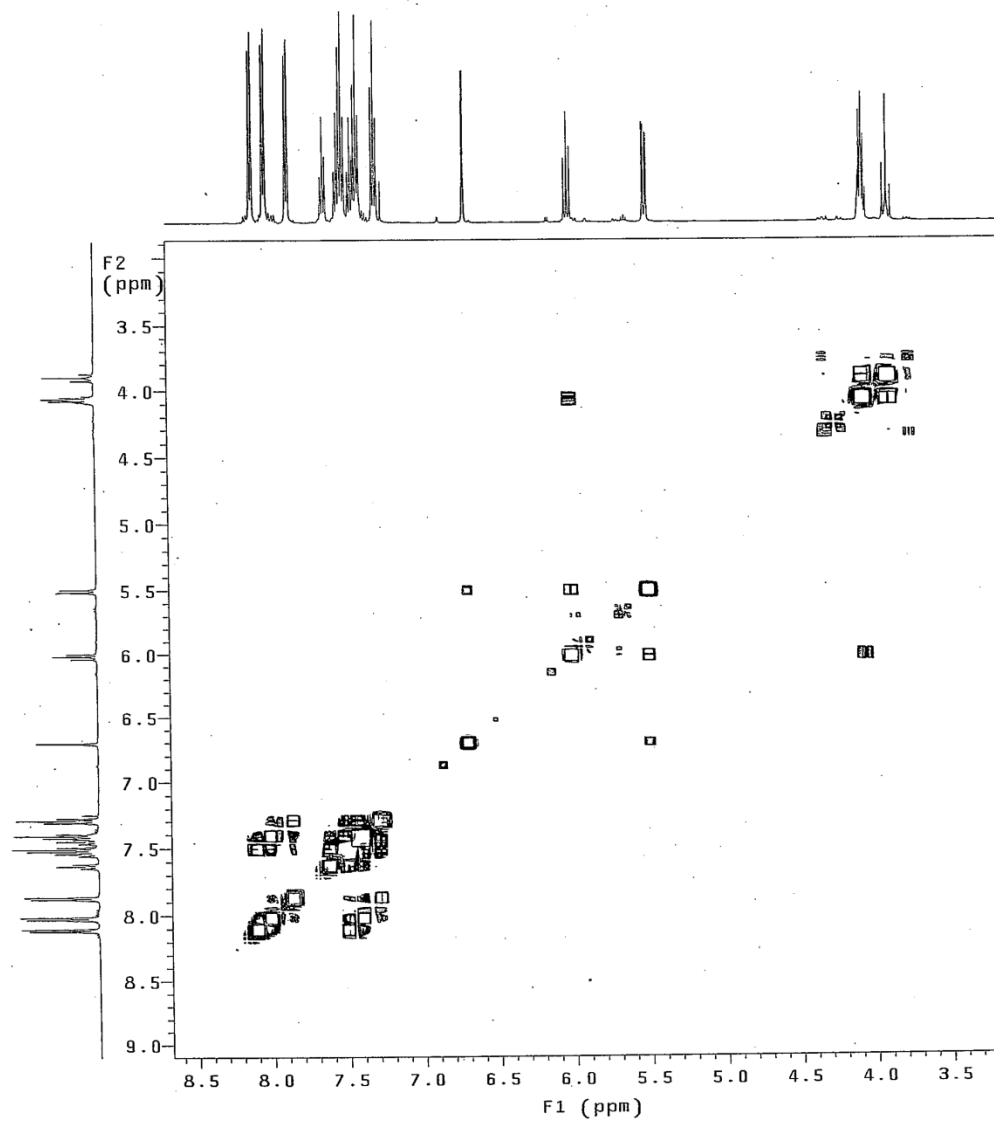

S130

1,2,3-tri-O-benzoyl-4-deoxy-4-azido- $\alpha$ -L-xylopyranoside (**36**):  $^{13}\text{C}$  NMR ( $\text{CDCl}_3$ , 125 MHz)

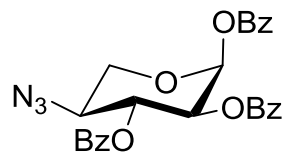

165.973  
165.705  
164.787

134.188  
133.887  
133.792  
130.107  
130.102  
129.179  
129.128  
129.048  
128.821  
128.778  
128.704

90.508

77.586  
77.332  
77.078

71.331  
70.693  
70.668

62.263  
59.763  
59.744

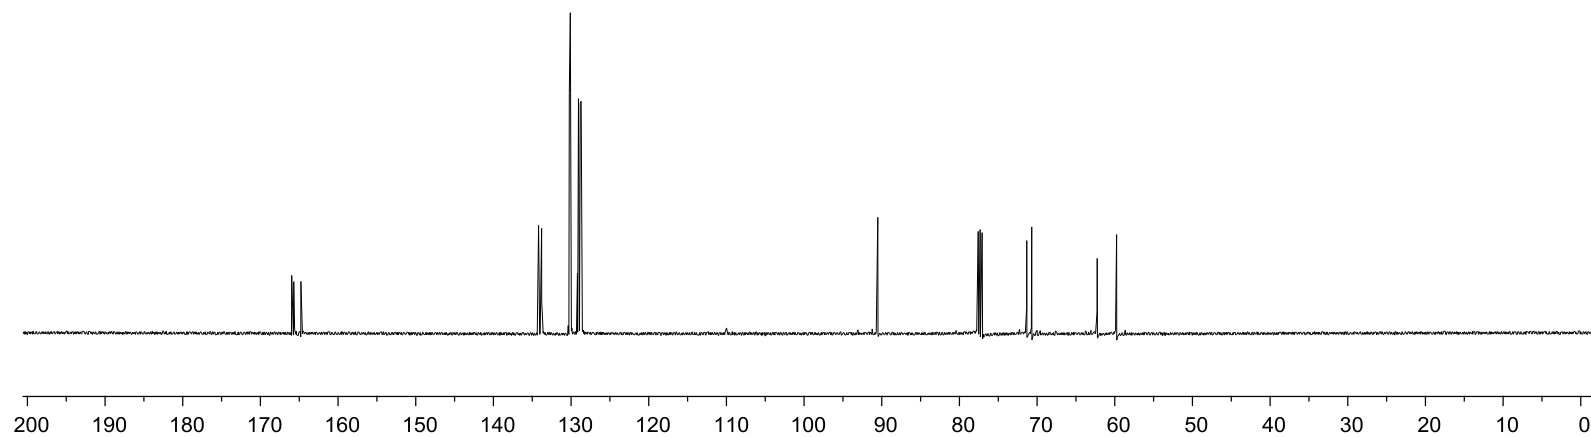

1-bromo-2,3-di-O-benzoyl-4-deoxy-4-azido- $\alpha$ -D-xylopyranoside (**37**):  $^1\text{H}$  NMR ( $\text{CD}_3\text{Cl}$ , 400 MHz)

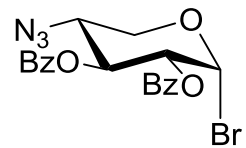

8.097  
8.014  
8.012  
8.011  
7.999  
7.994  
7.990  
7.988  
7.975  
7.970  
7.966  
7.505  
7.399  
7.372  
7.242  
6.743  
6.733  
5.980  
5.976  
5.956  
5.951  
5.932  
5.174  
5.164  
5.149  
5.139  
4.151  
4.121  
4.106  
4.097  
4.078  
4.075  
4.024  
4.017  
4.003  
3.995  
3.993  
3.975  
3.949

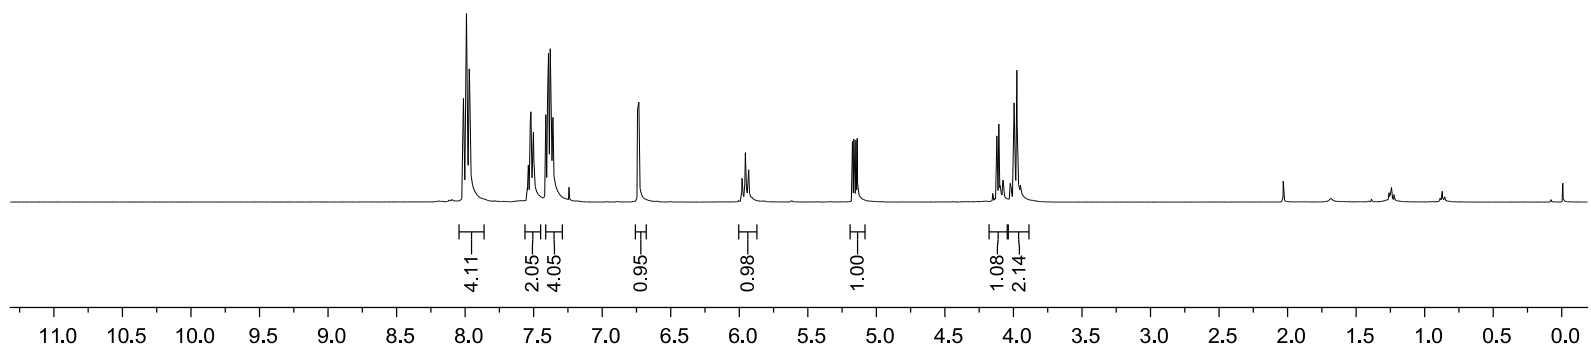



1-bromo-2,3-di-O-benzoyl-4-deoxy-4-azido- $\alpha$ -D-xylopyranoside (**37**):  $^{13}\text{C}$  NMR ( $\text{CD}_3\text{Cl}$ , 100 MHz)

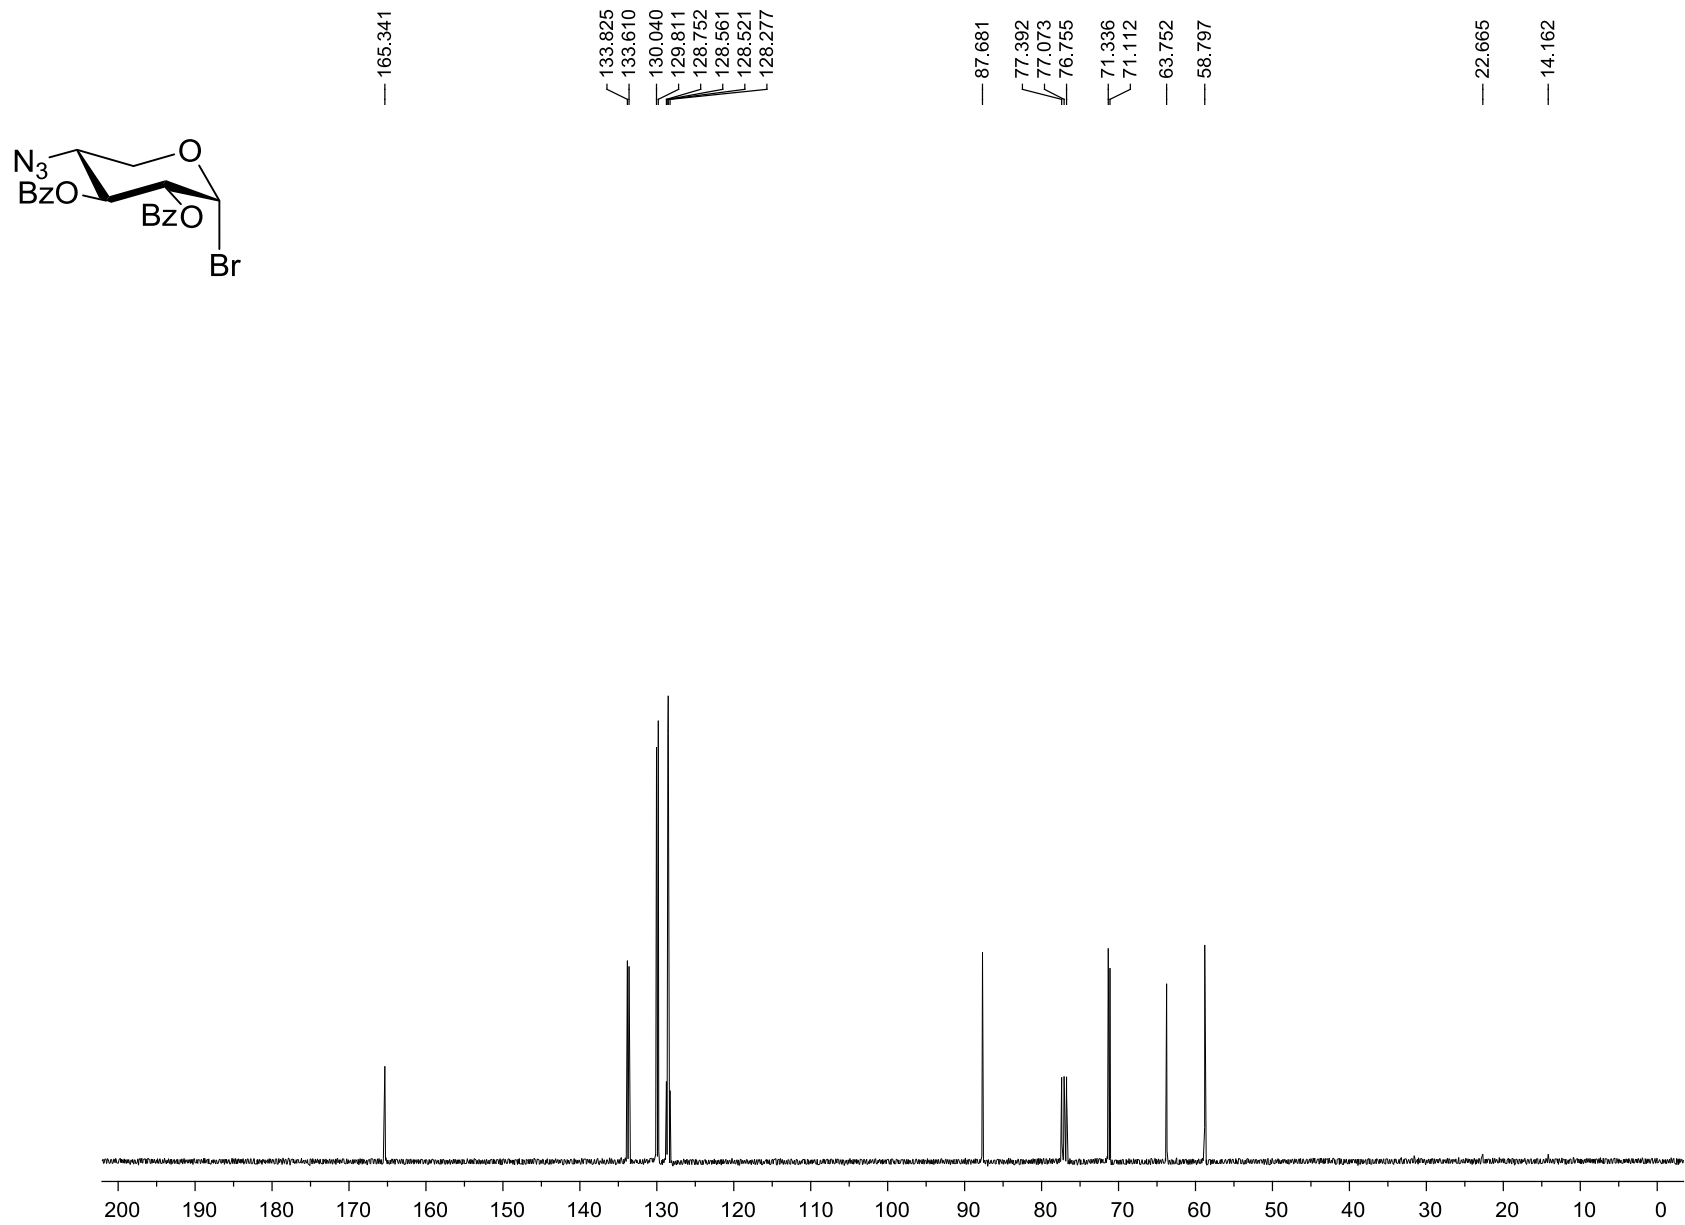

1-bromo-2,3-di-O-benzoyl-4-deoxy-4-azido- $\alpha$ -L-xylopyranoside (**38**):  $^1\text{H}$  NMR ( $\text{CDCl}_3$ , 400 MHz)

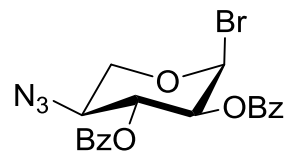

8.016  
8.015  
7.995  
7.992  
7.974  
7.976  
7.431  
7.411  
7.378  
7.259  
6.741  
6.731  
5.979  
5.955  
5.931  
5.171  
5.161  
5.147  
5.137  
4.143  
4.135  
4.121  
4.114  
4.092  
4.033  
4.007  
3.999  
3.993  
3.984  
3.978

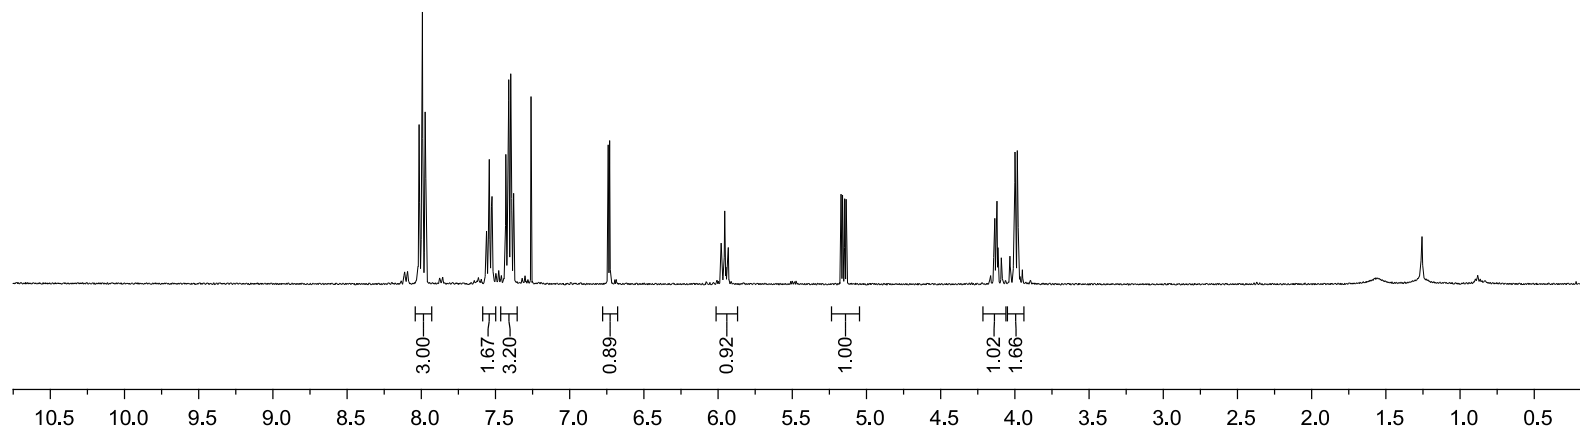

— 1.256

1-bromo-2,3-di-O-benzoyl-4-deoxy-4-azido- $\alpha$ -L-xylopyranoside (**38**):  $^{13}\text{C}$  NMR ( $\text{CDCl}_3$ , 100 MHz)

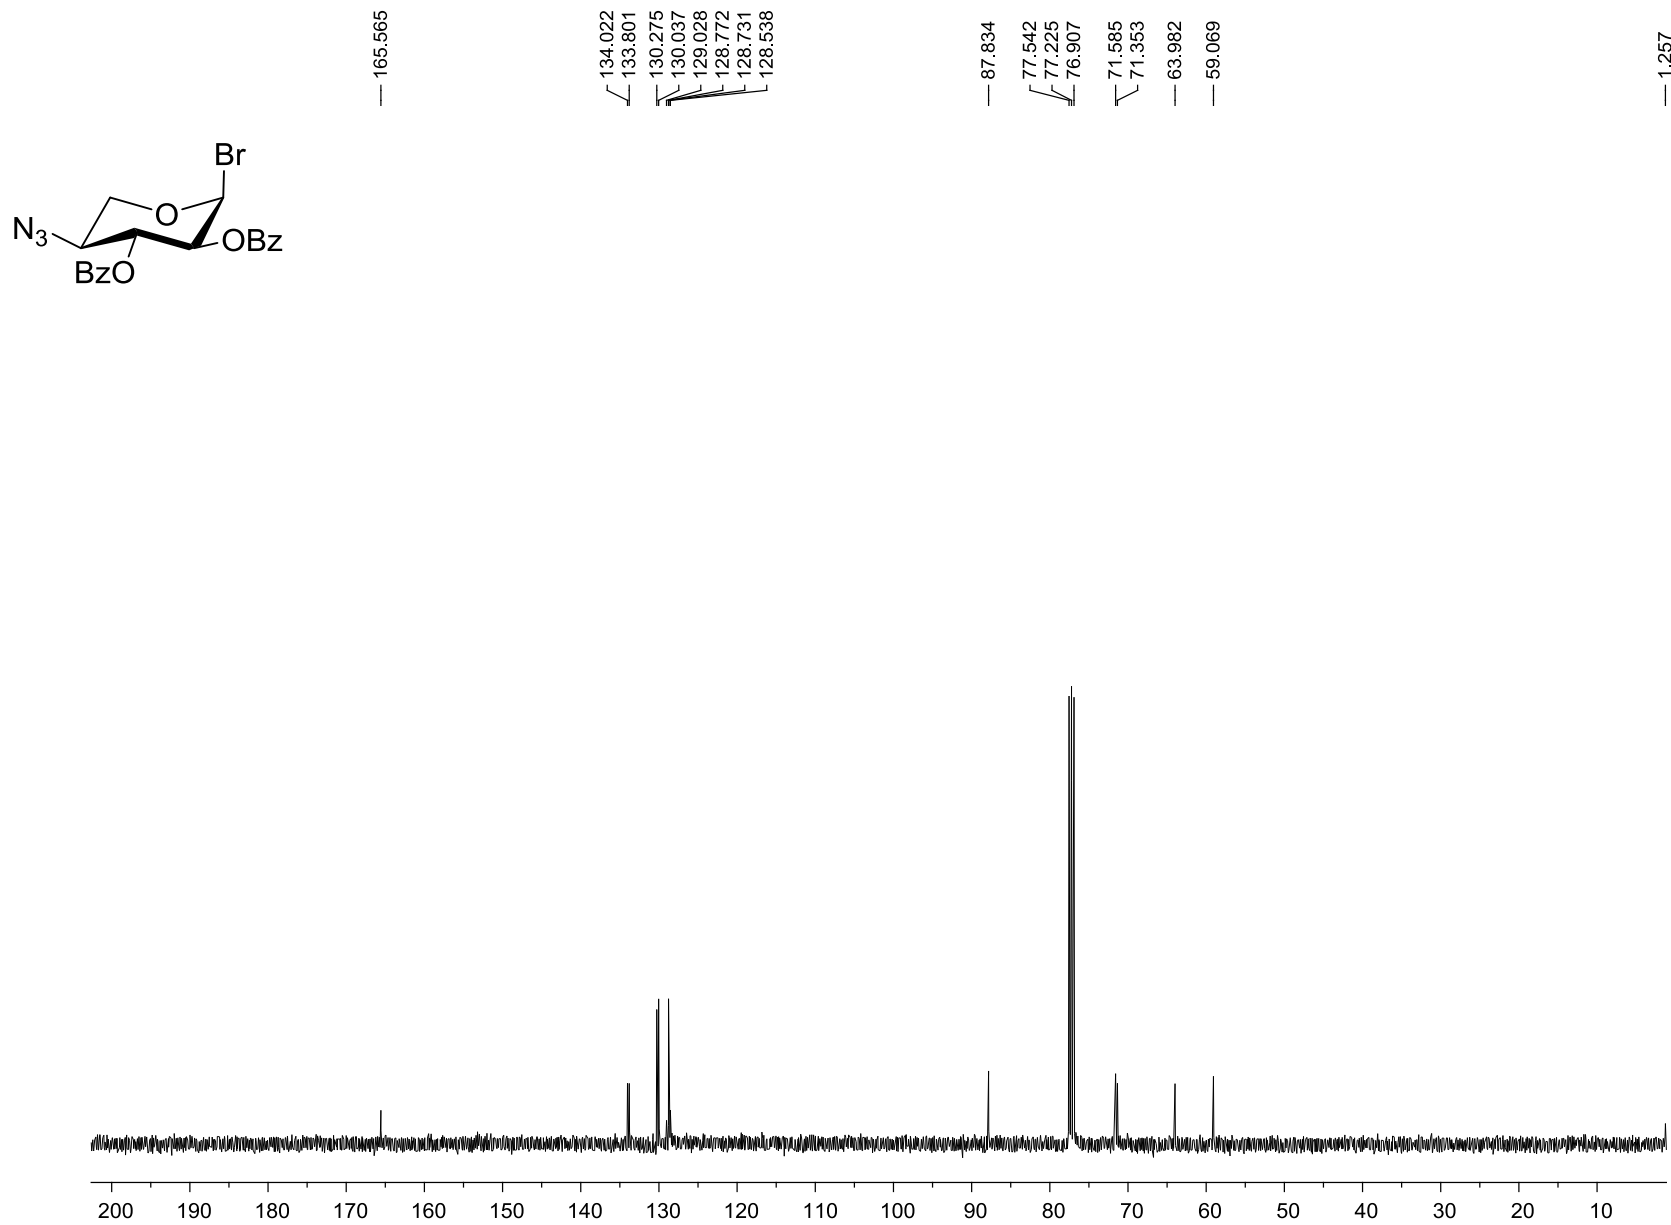

(2-chloro-4-nitrophenyl)-2,3-di-O-benzoyl-4-deoxy-4-azido- $\beta$ -D-xylopyranoside (**39**):  $^1\text{H}$  NMR ( $\text{CDCl}_3$ , 400 MHz)

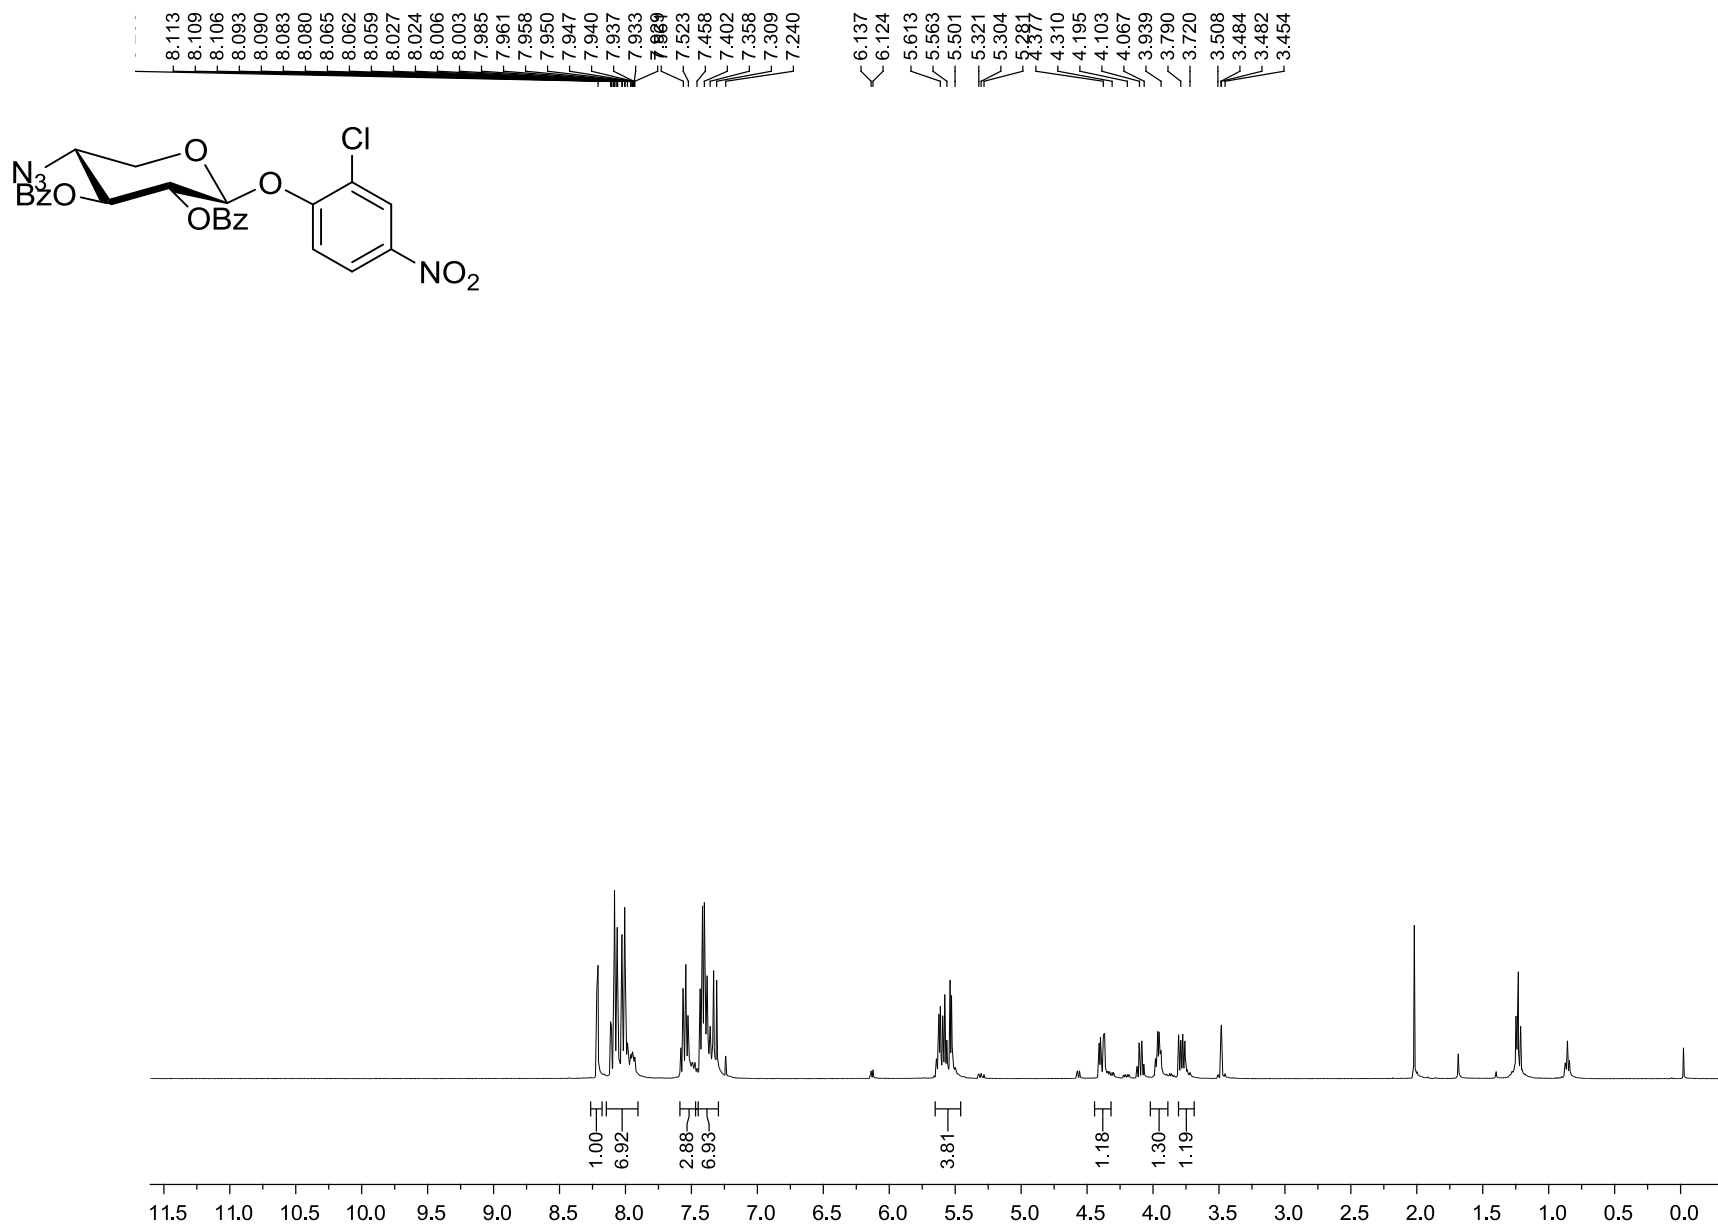

(2-chloro-4-nitrophenyl)-2,3-di-O-benzoyl-4-deoxy-4-azido- $\beta$ -D-xylopyranoside (**39**):  $^{13}\text{C}$  NMR ( $\text{CDCl}_3$ , 100 MHz)

— 171.146  
— 165.233  
— 165.144  
— 165.045  
— 157.122  
  
— 142.843  
— 133.812  
— 133.271  
— 129.836  
— 128.544  
— 128.350  
— 123.706  
— 116.006  
  
— 102.056  
— 98.401  
— 92.716  
  
— 77.380  
— 77.062  
— 76.744  
— 71.186  
— 69.027  
  
— 63.413  
— 63.039  
— 61.644  
— 60.386  
— 59.076  
— 58.267  
— 57.017  
— 56.923

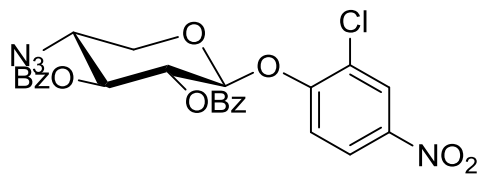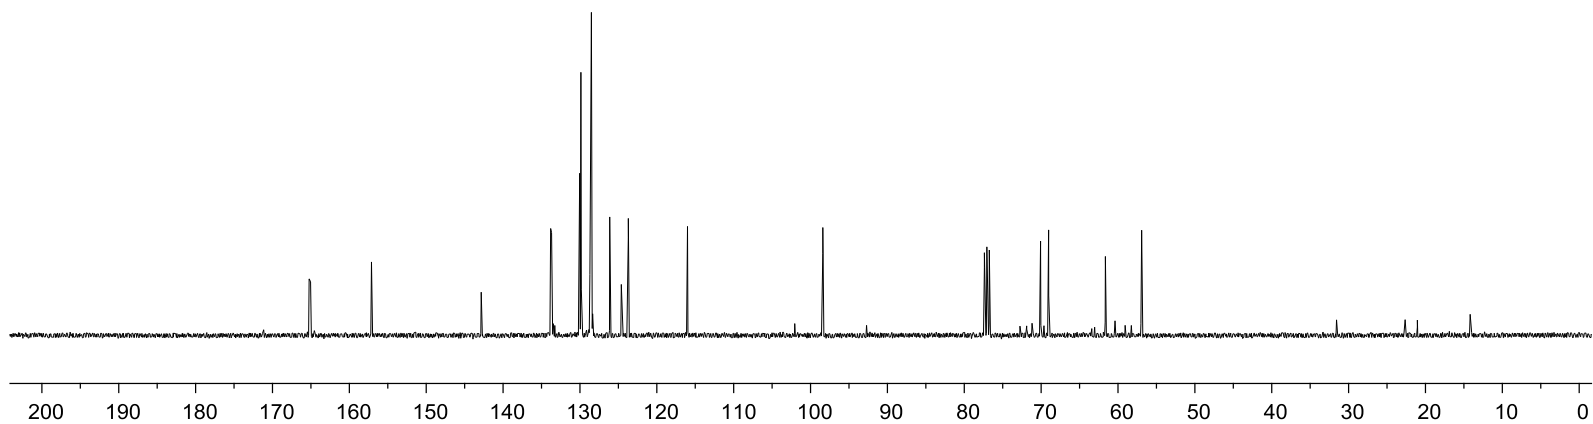

S137

(2-chloro-4-nitrophenyl)-4-deoxy-4-azido-2,3-di-O-benzoyl- $\beta$ -L-xylopyranoside (**40**):  $^1\text{H}$  NMR ( $\text{CDCl}_3$ , 500 MHz)

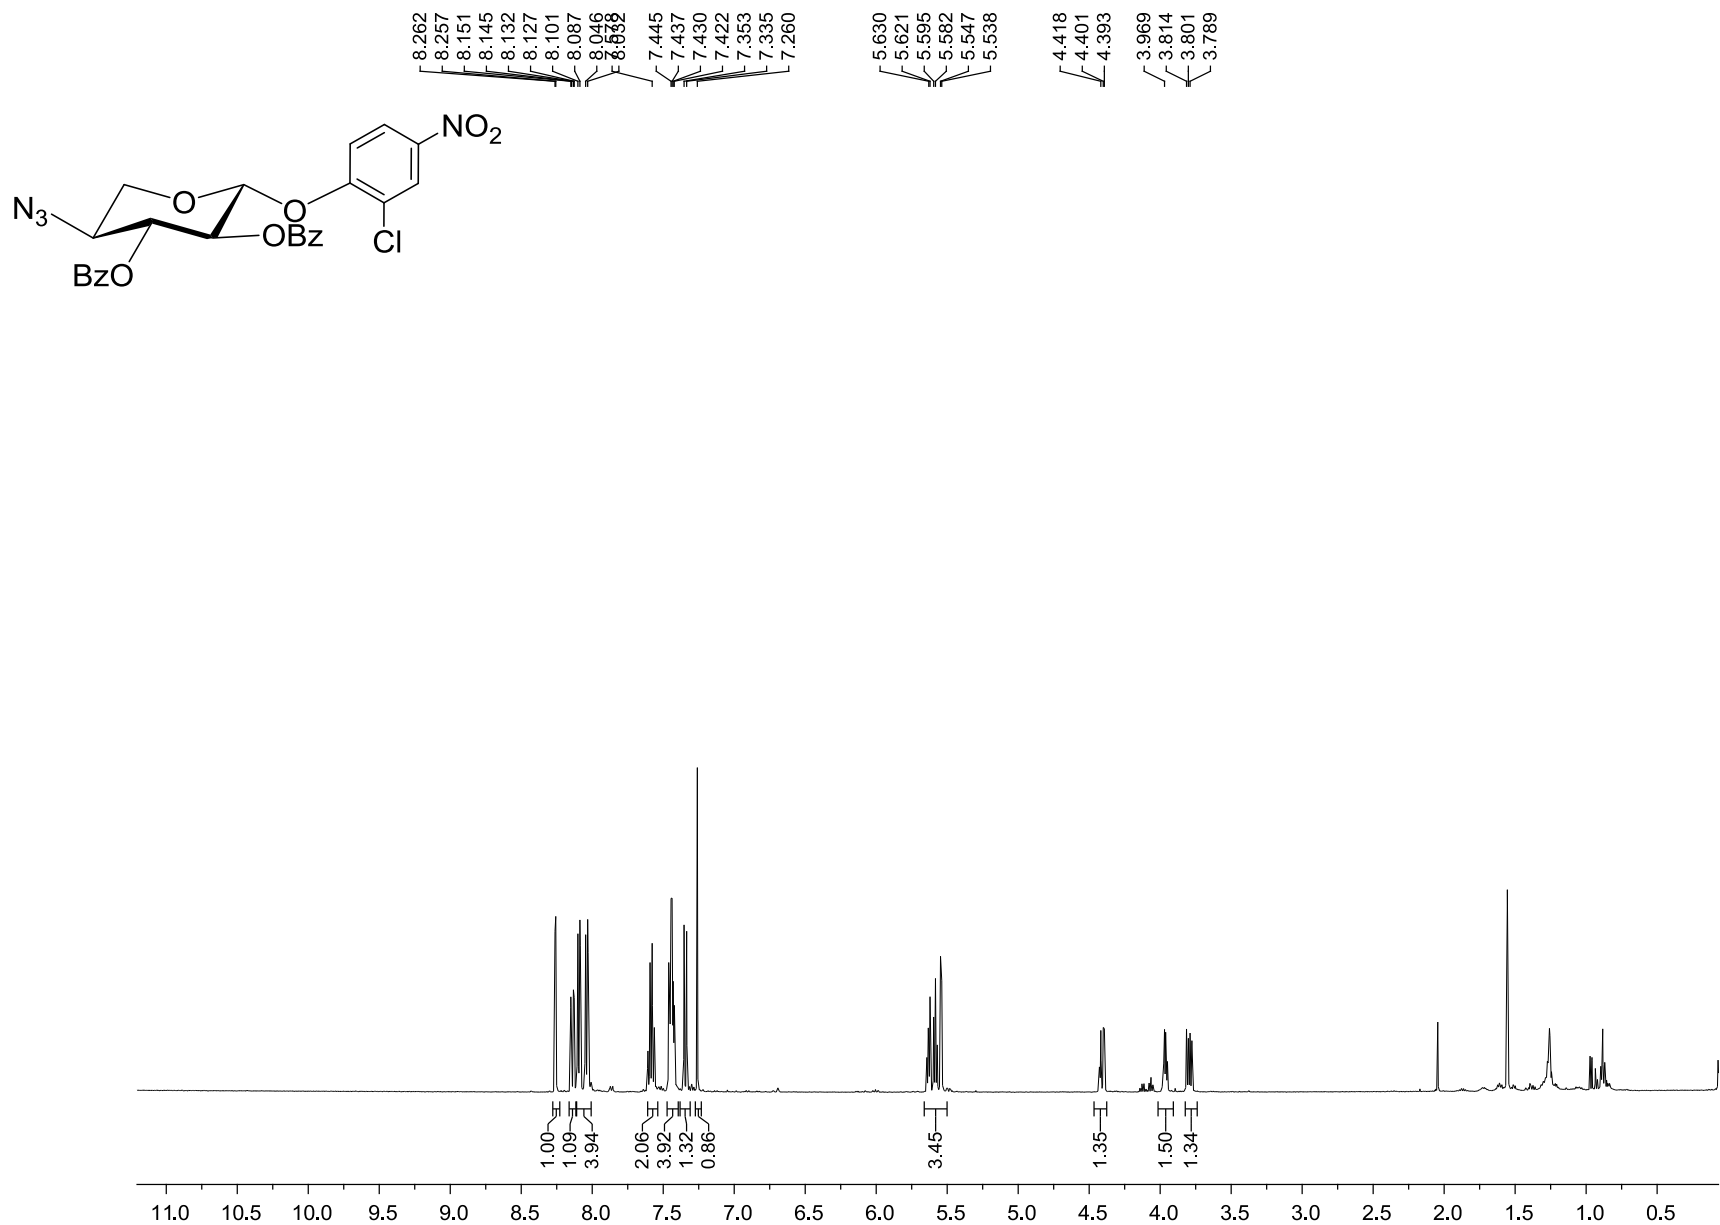

S138

(2-chloro-4-nitrophenyl)-4-deoxy-4-azido-2,3-di-O-benzoyl- $\beta$ -L-xylopyranoside (**40**):  $^{13}\text{C}$  NMR ( $\text{CDCl}_3$ , 125 MHz)

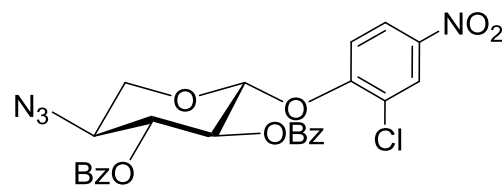

— 167.328  
— 159.232  
└ 135.914  
└ 135.804  
└ 132.003  
└ 130.615  
└ 125.795  
— 118.193  
— 100.541  
└ 79.352  
└ 79.097  
└ 78.843  
└ 72.119  
└ 71.122  
— 63.709  
— 59.000

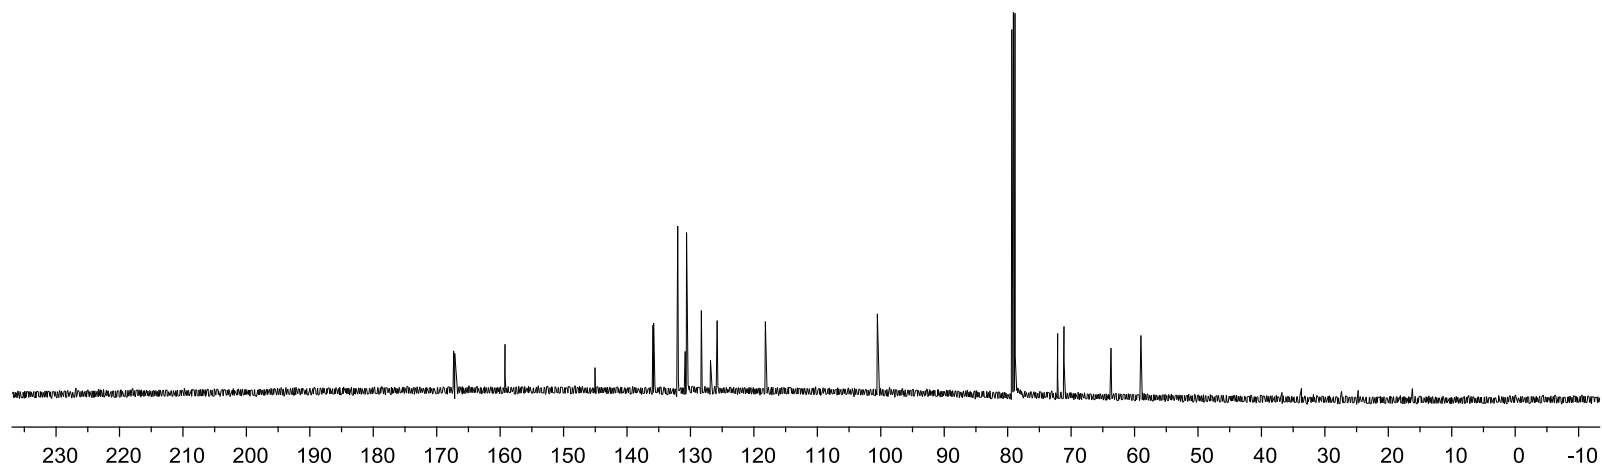

S139

1,2,3-tri-O-acetyl-4-deoxy-4-azido-L-xylopyranoside (**41**):  $^1\text{H}$  NMR ( $\text{CDCl}_3$ , 500 MHz)

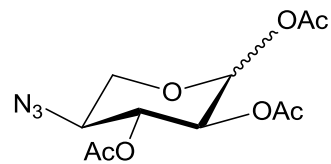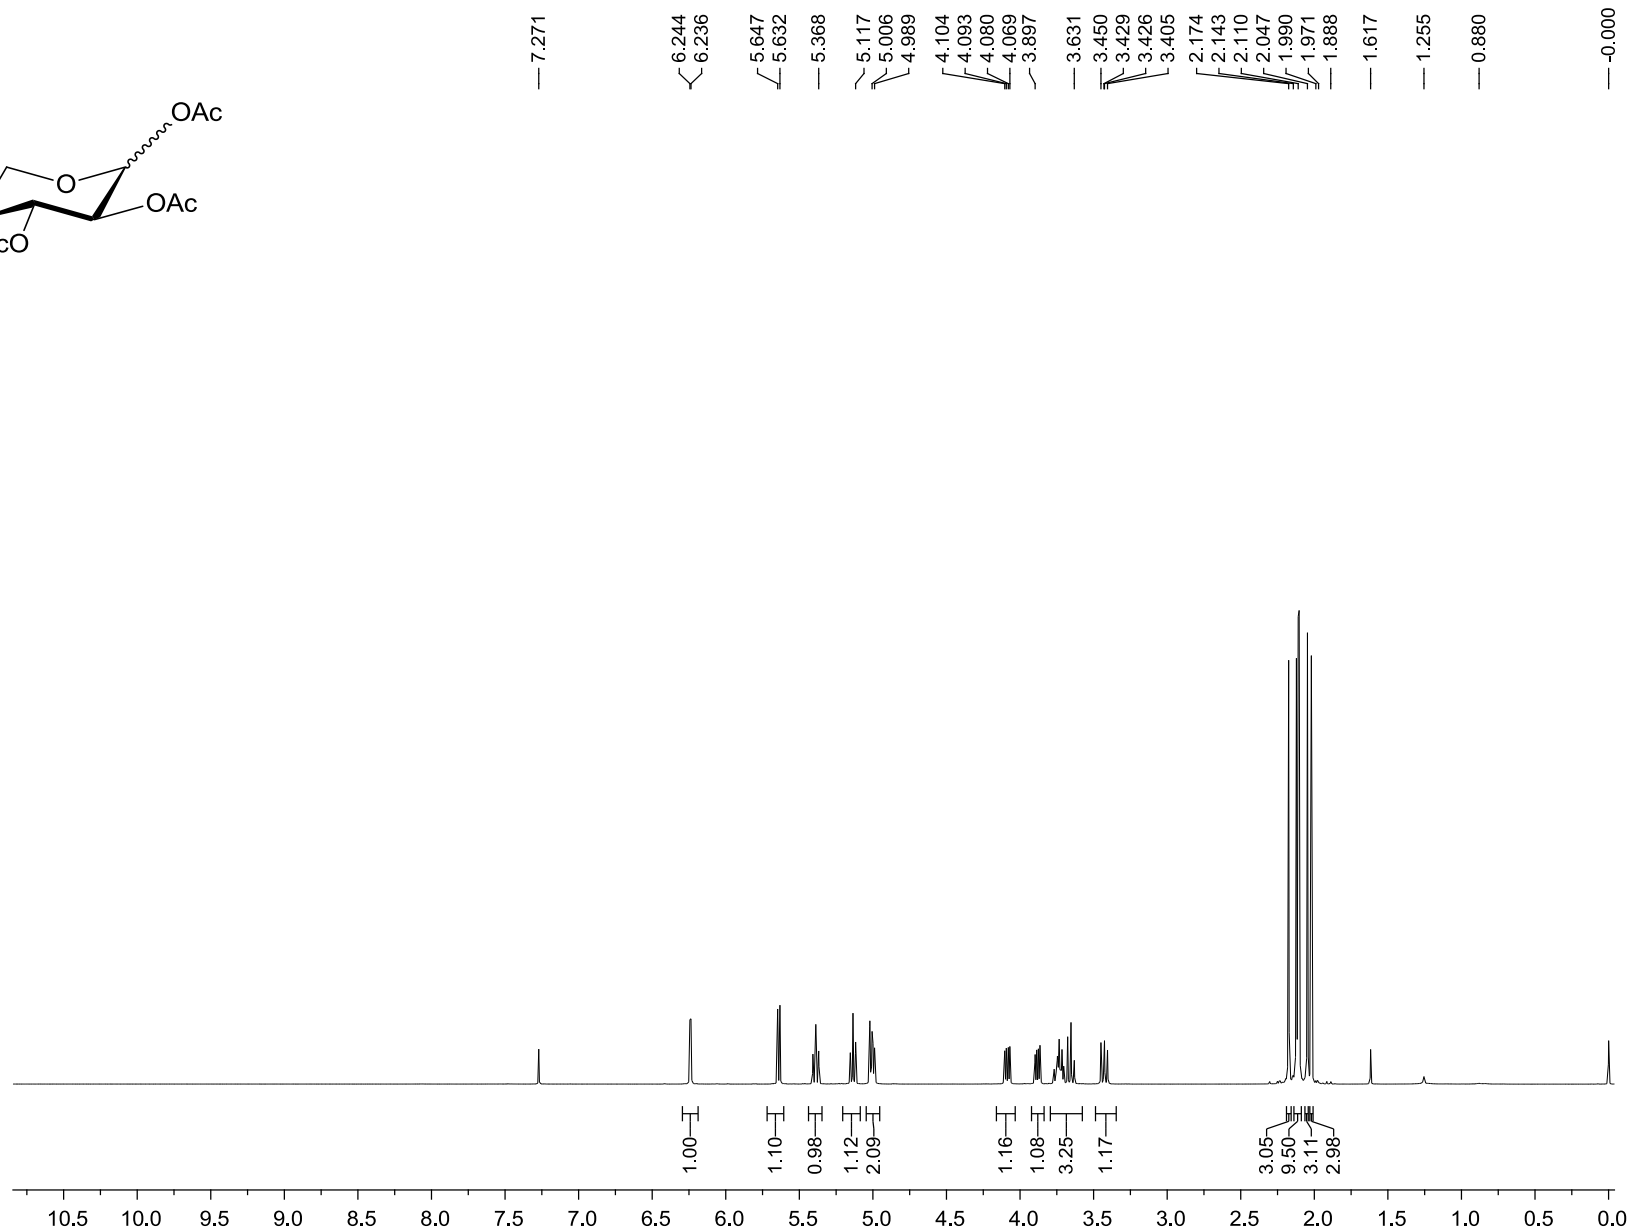

S140



1,2,3-tri-O-acetyl-4-deoxy-4-azido-L-xylopyranoside (**41**): gCOSY NMR (CDCl<sub>3</sub>, 500 MHz)

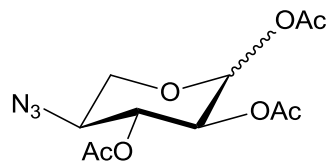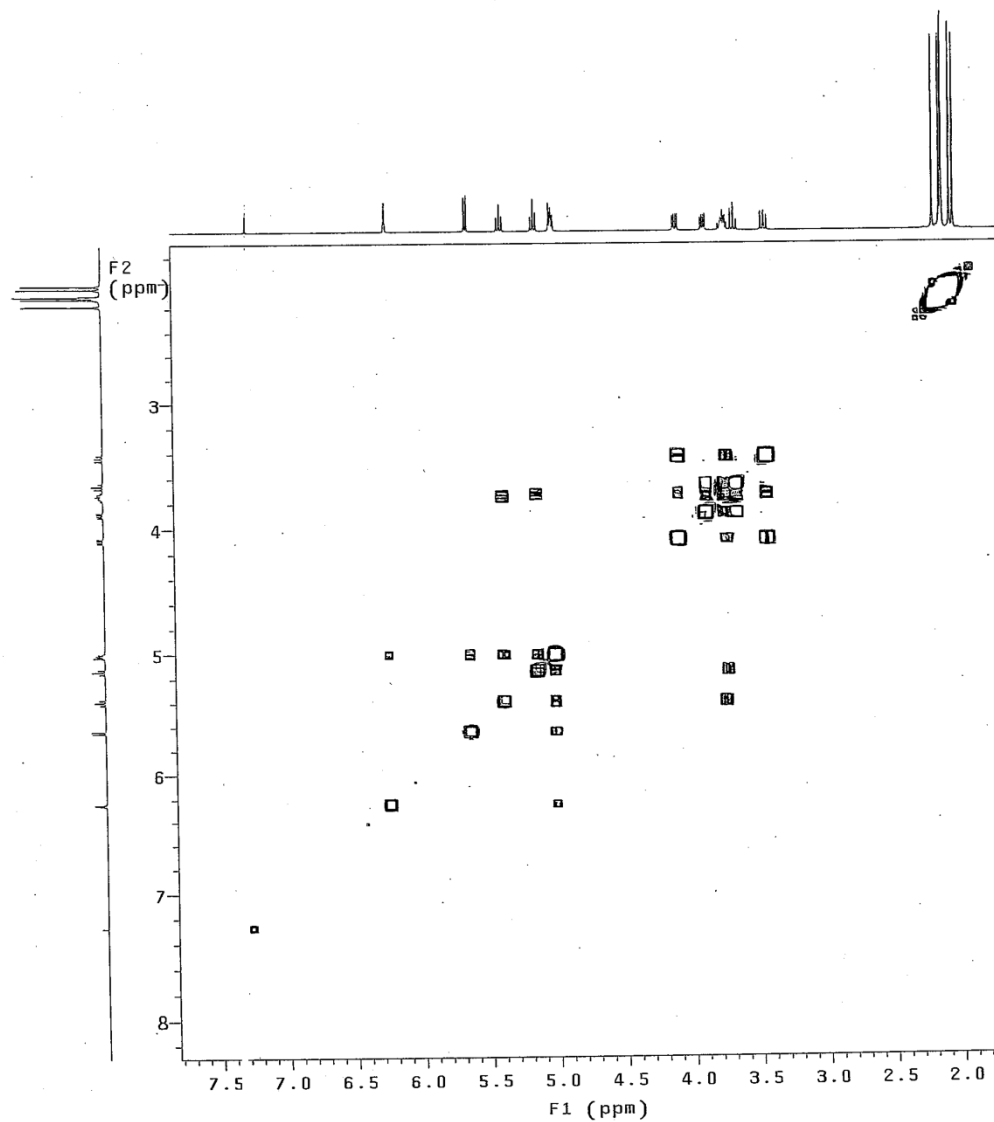

S141

1,2,3-tri-O-acetyl-4-deoxy-4-azido-L-xylopyranoside (**41**):  $^{13}\text{C}$  NMR ( $\text{CDCl}_3$ , 125 MHz)

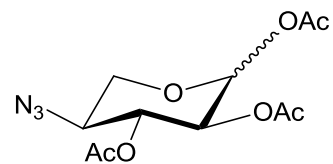

170.119  
170.091  
170.018  
169.766  
169.261  
169.166

92.454  
89.641

77.555  
77.300  
77.046

70.705  
69.715

64.292  
61.865

59.364  
58.767

21.138  
21.019  
20.982  
20.915  
20.832  
20.742

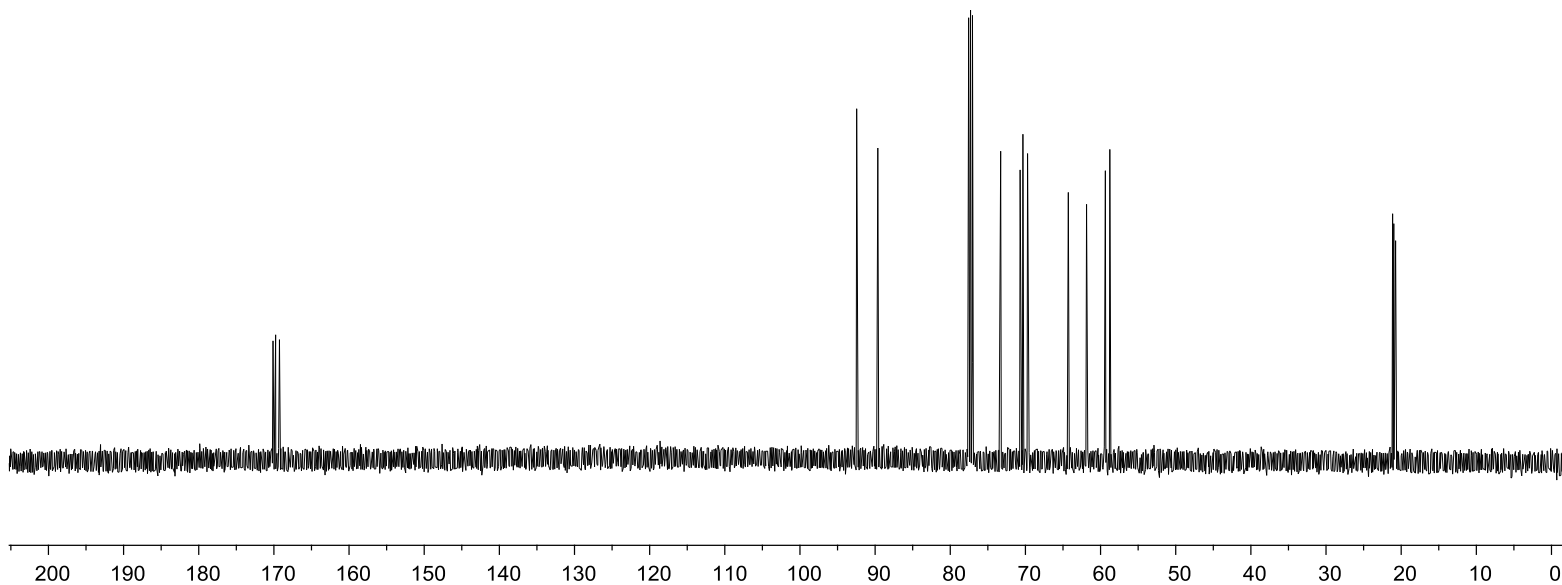

1-bromo-2,3-di-O-acetyl-4-deoxy-4-azido- $\alpha$ -L-xylopyranoside (**42**):  $^1\text{H}$  NMR ( $\text{CDCl}_3$ , 400 MHz)

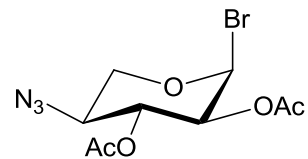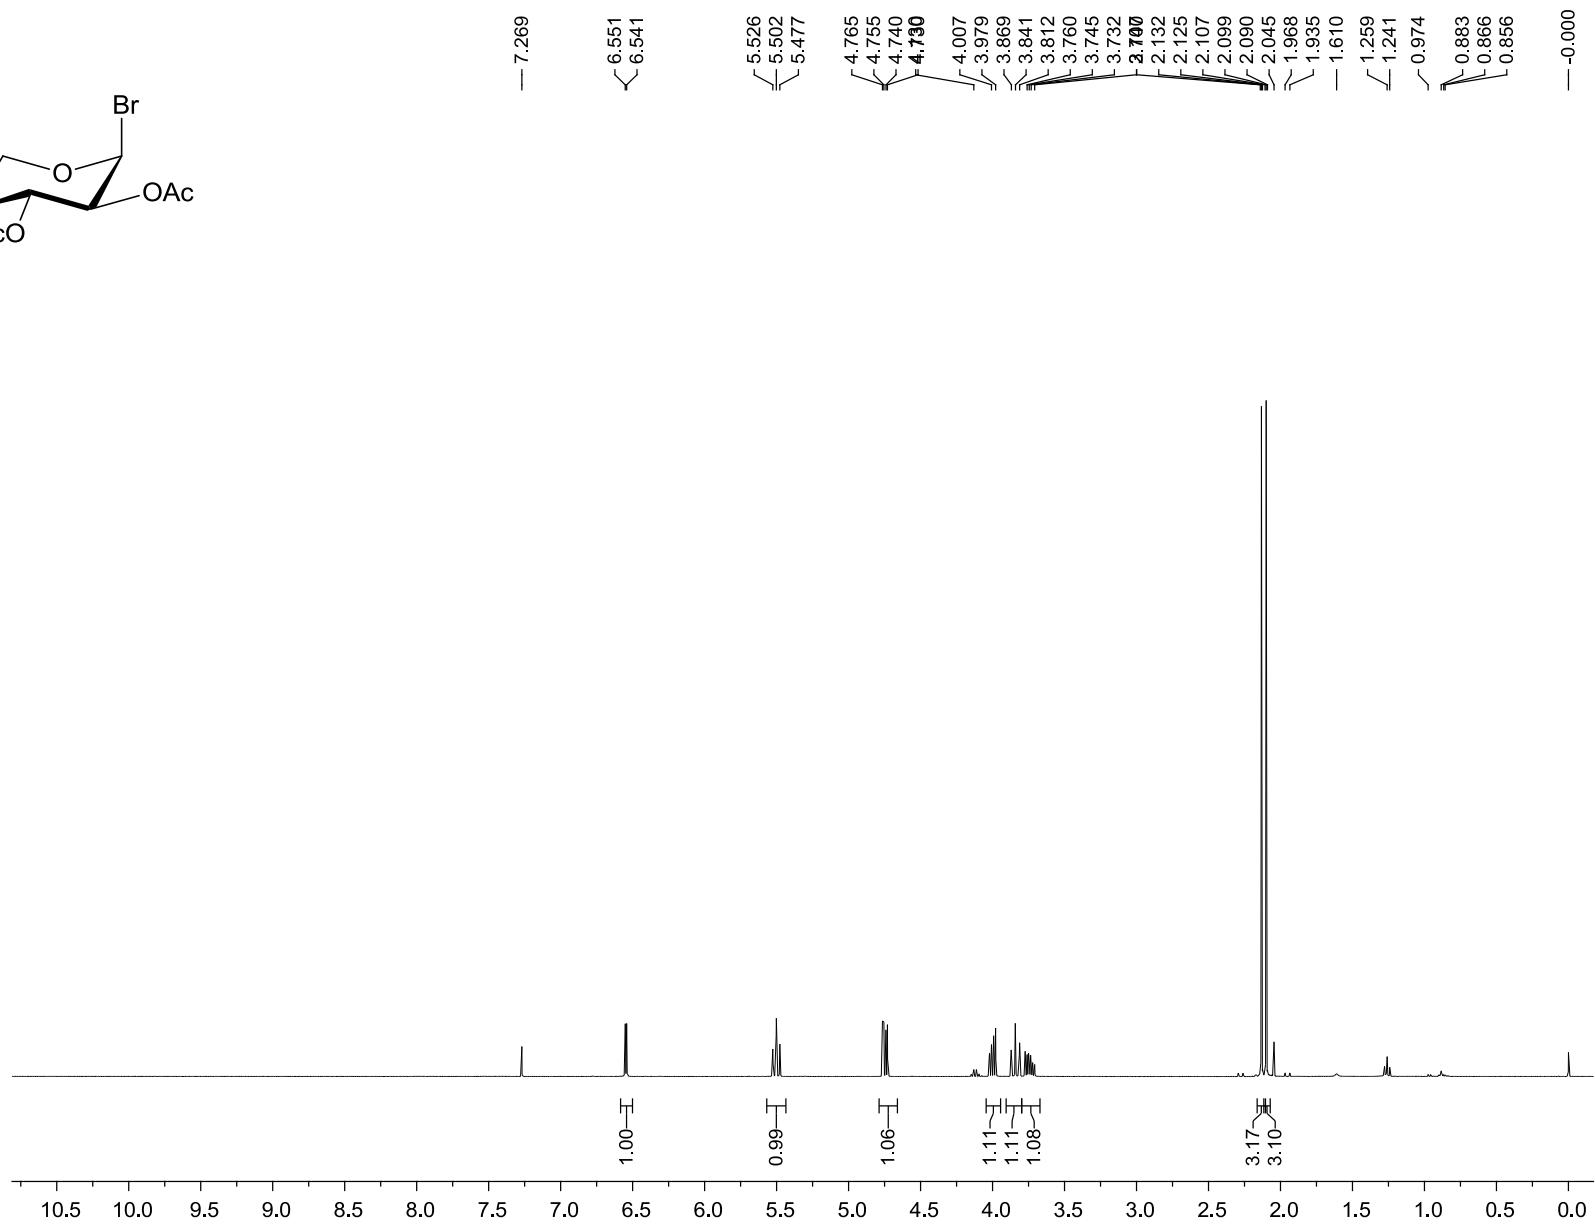

1-bromo-2,3-di-O-acetyl-4-deoxy-4-azido- $\alpha$ -L-xylopyranoside (**42**): gCOSY NMR ( $\text{CDCl}_3$ , 400 MHz)

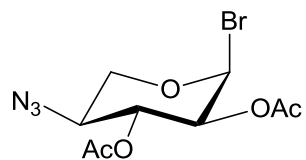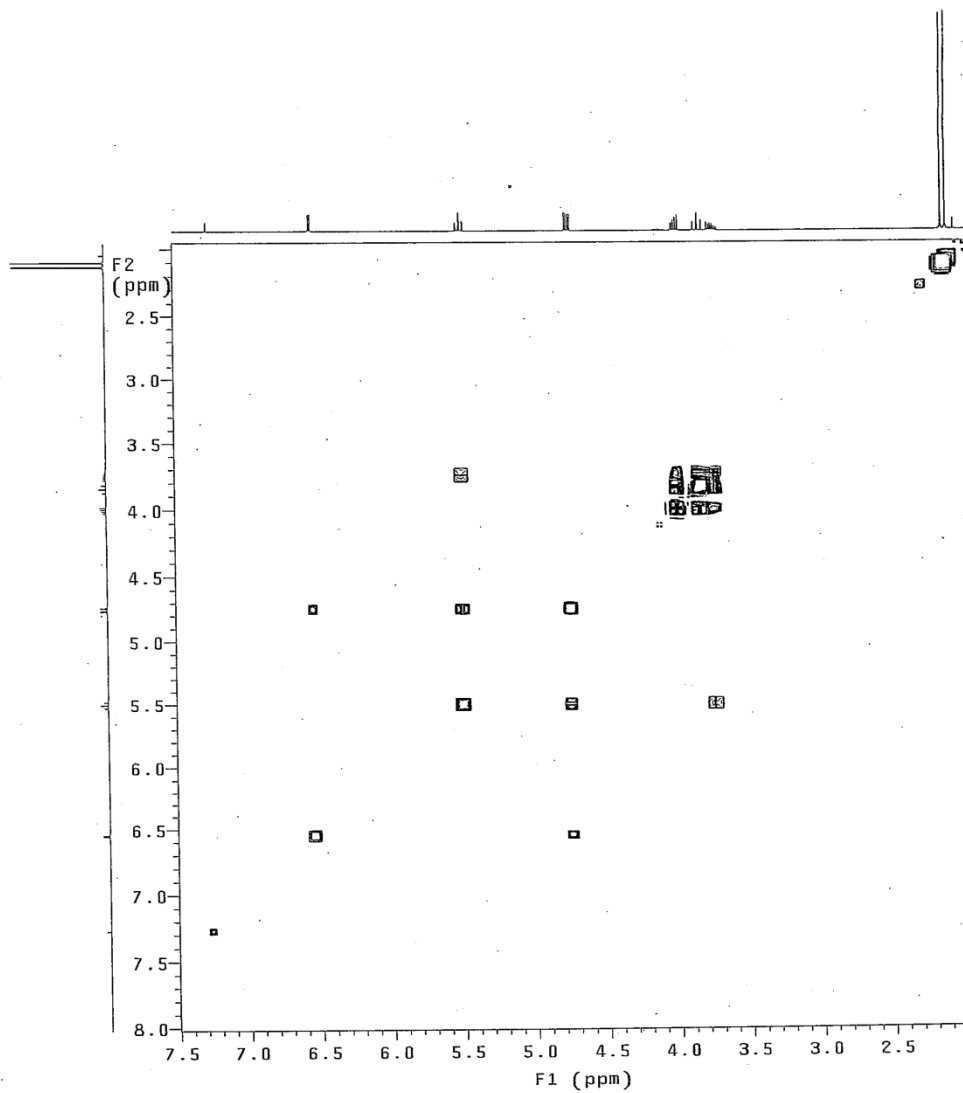

S144

1-bromo-2,3-di-O-acetyl-4-deoxy-4-azido- $\alpha$ -L-xylopyranoside (**42**):  $^{13}\text{C}$  NMR ( $\text{CDCl}_3$ , 100 MHz)

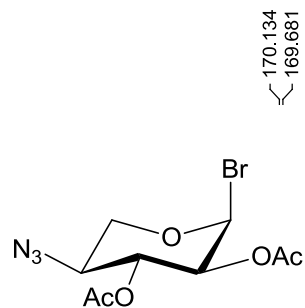

170.134  
169.681

87.619  
77.243  
76.924  
70.998  
70.719  
63.711  
58.776

20.874

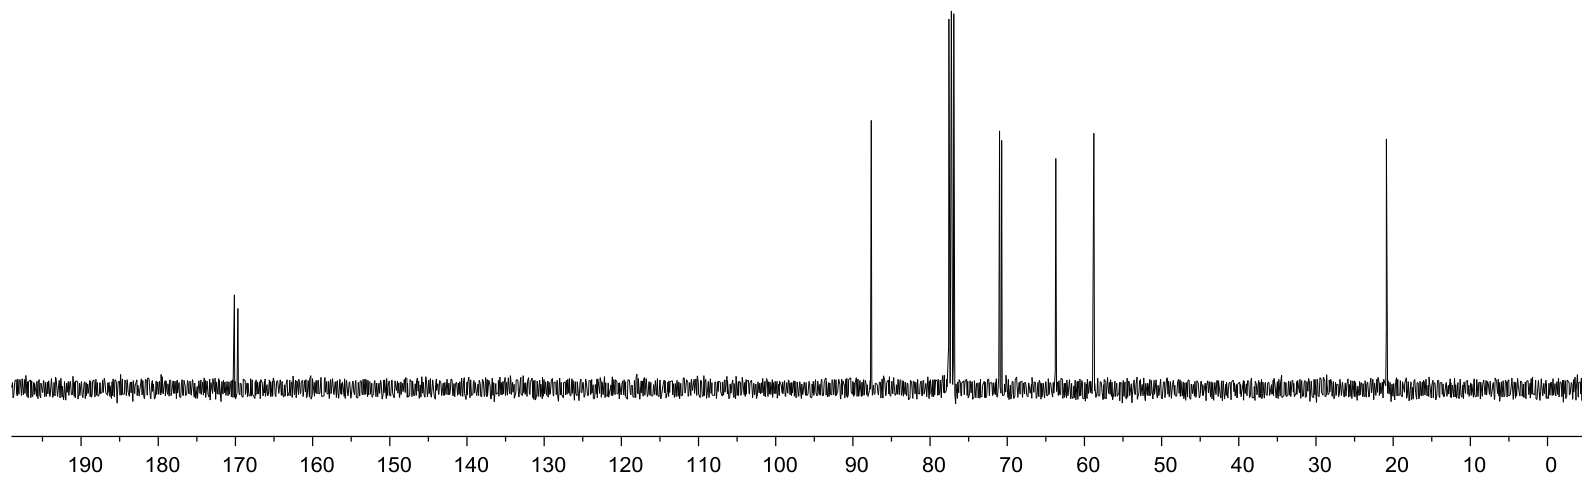

(2-chloro-4-nitrophenyl)-4-deoxy-4-azido-2,3-di-O-acetyl- $\beta$ -L-xylopyranoside (**43**):  $^1\text{H NMR}$  ( $\text{CDCl}_3$ , 500 MHz)

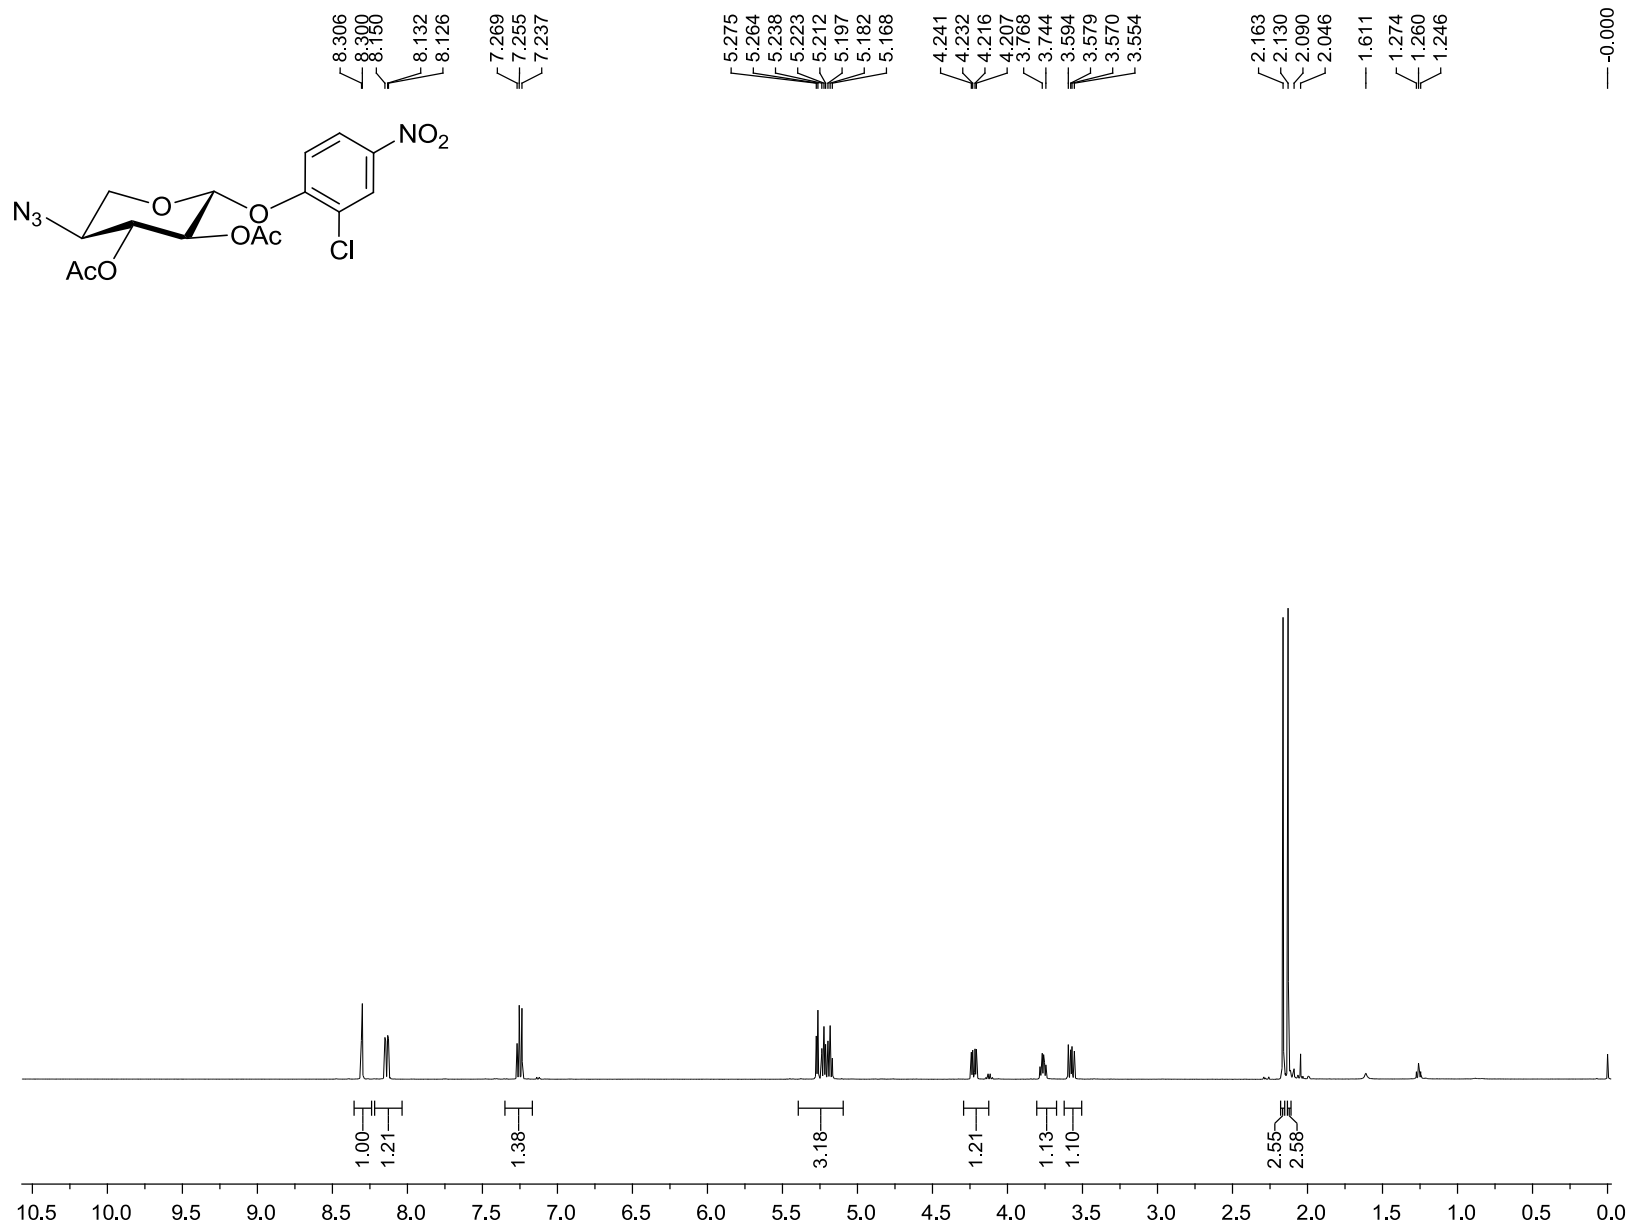

(2-chloro-4-nitrophenyl)-4-deoxy-4-azido-2,3-di-O-acetyl- $\beta$ -L-xylopyranoside (**43**): gCOSY NMR ( $\text{CDCl}_3$ , 500 MHz)

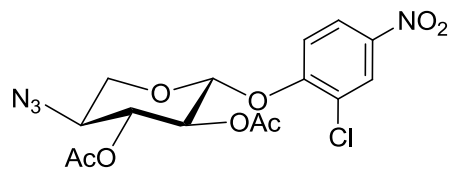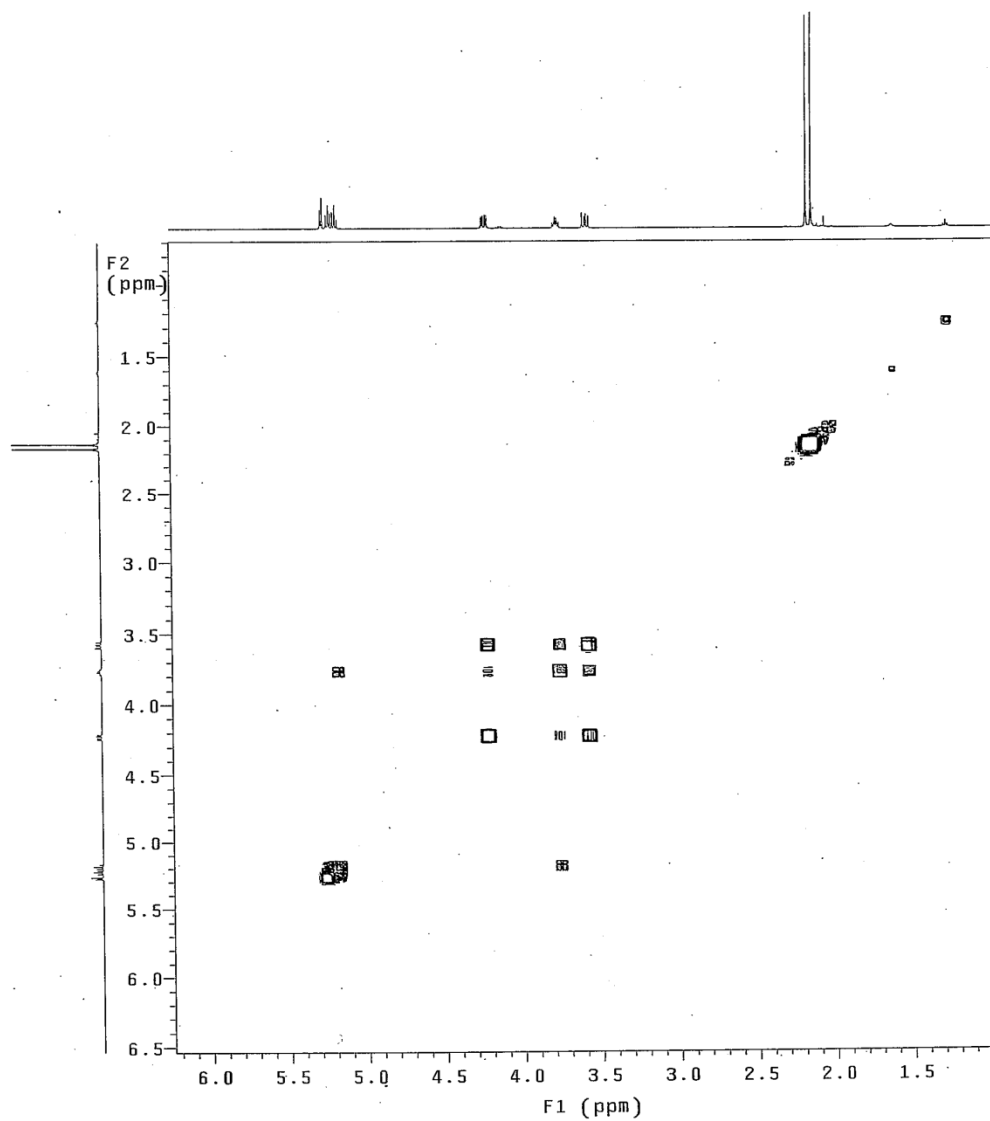

S147

(2-chloro-4-nitrophenyl)-4-deoxy-4-azido-2,3-di-O-acetyl- $\beta$ -L-xylopyranoside (**43**):  $^{13}\text{C}$  NMR ( $\text{CDCl}_3$ , 125 MHz)

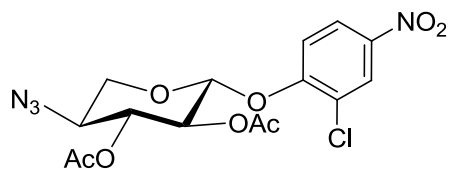

169.952  
169.623

157.236

143.266

126.482  
124.887  
123.998

116.201

98.785

77.554  
77.300  
77.045

71.067  
69.458

62.708

57.459

20.997  
20.910

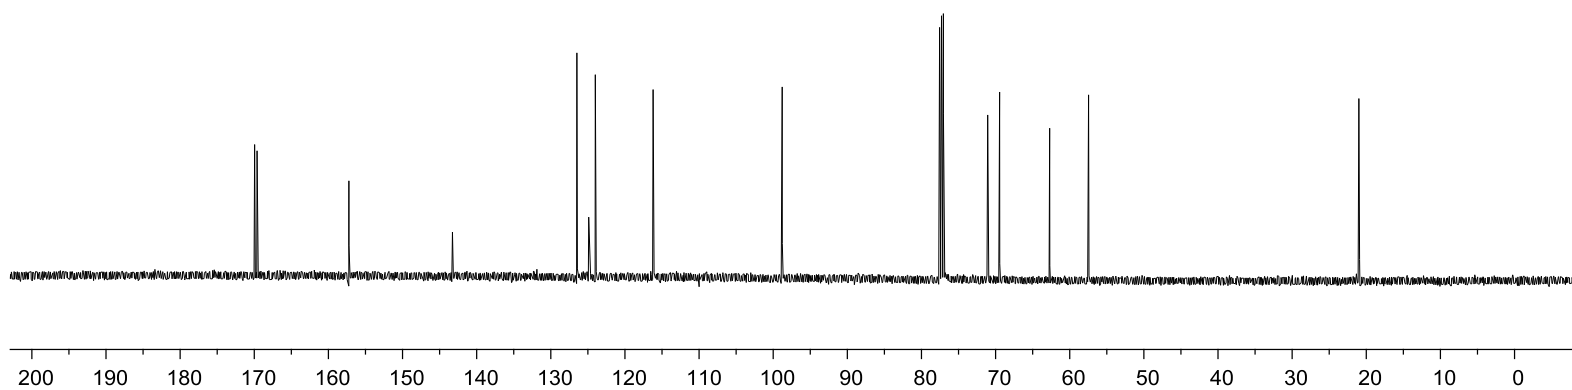



1,2,3,4-tetra-O-benzoyl- $\alpha$ -D-ribofuranose (**44**):  $^1\text{H}$  NMR ( $\text{CDCl}_3$ , 500 MHz)

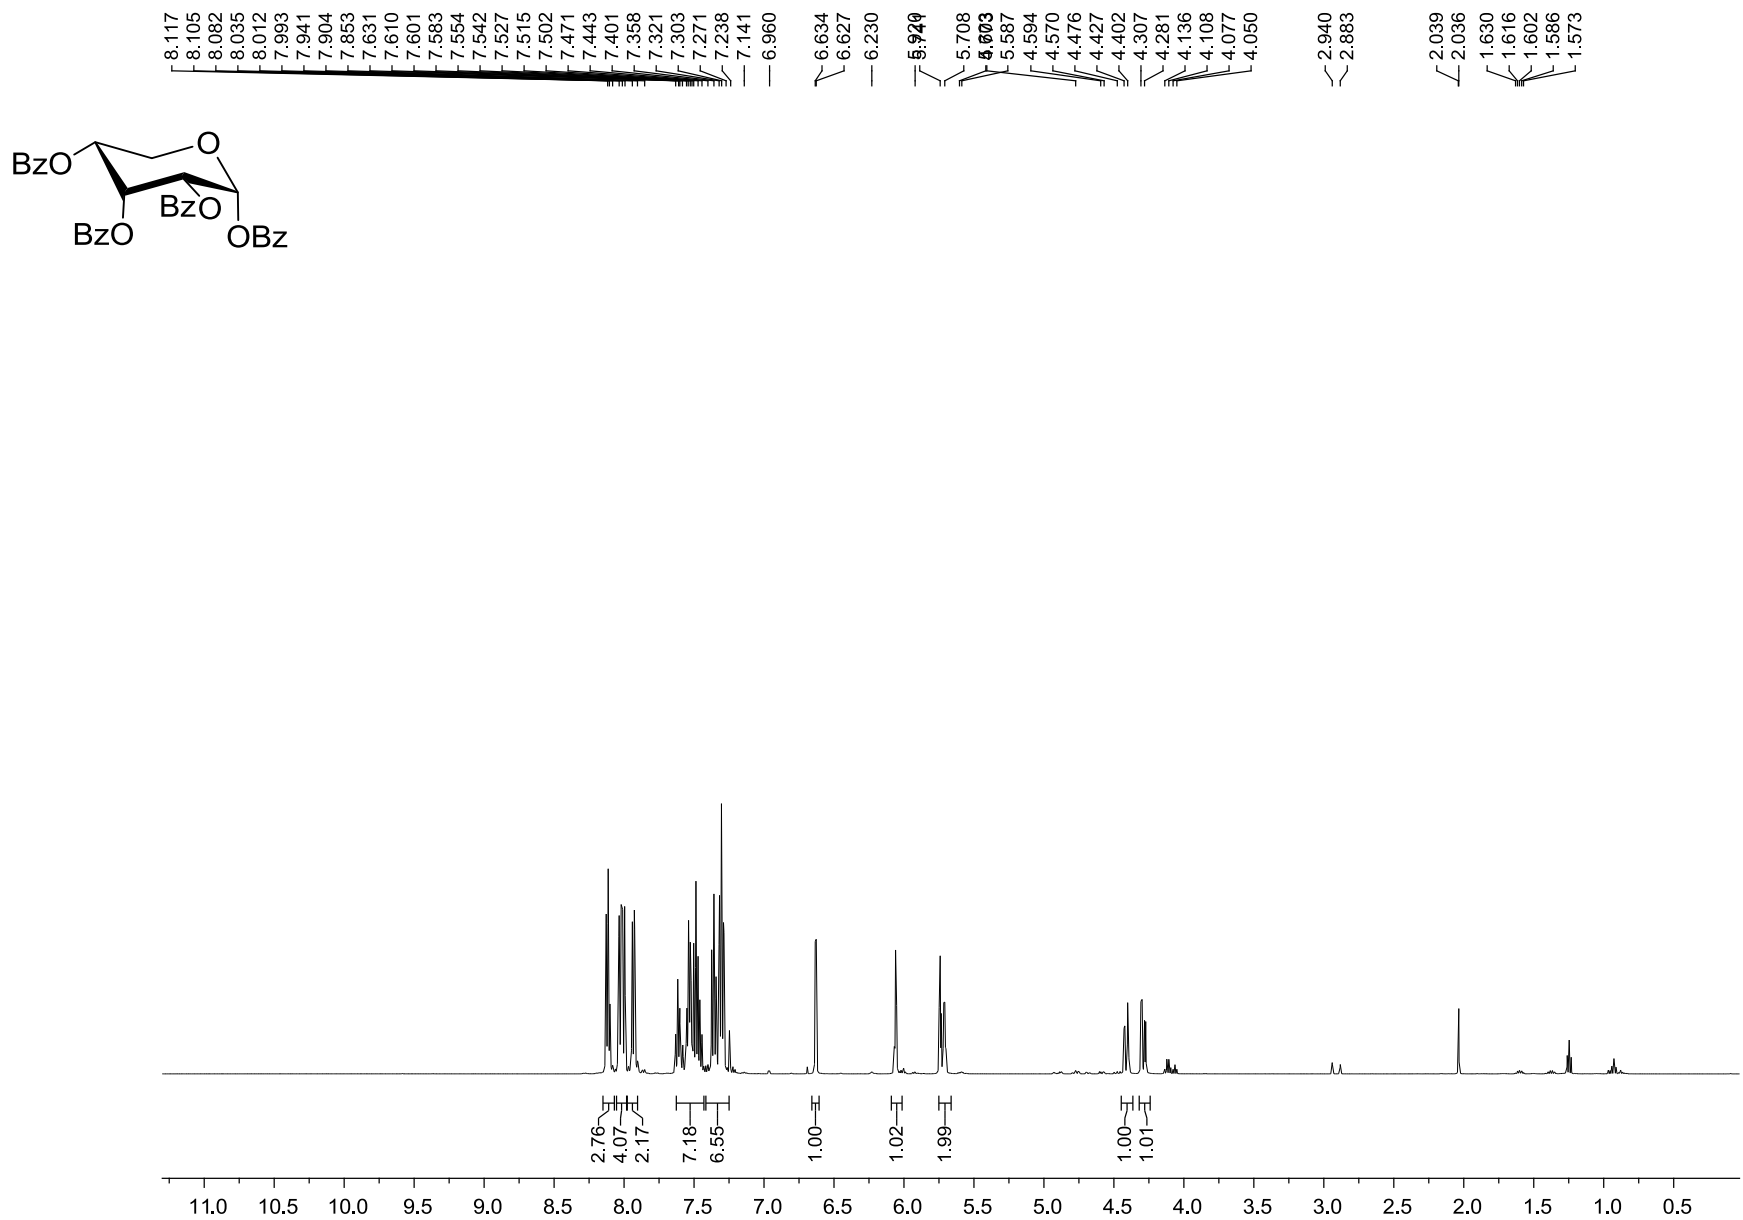

1,2,3,4-tetra-O-benzoyl- $\alpha$ -D-ribofuranoside (**44**): gCOSY NMR ( $\text{CDCl}_3$ , 500 MHz)

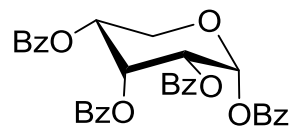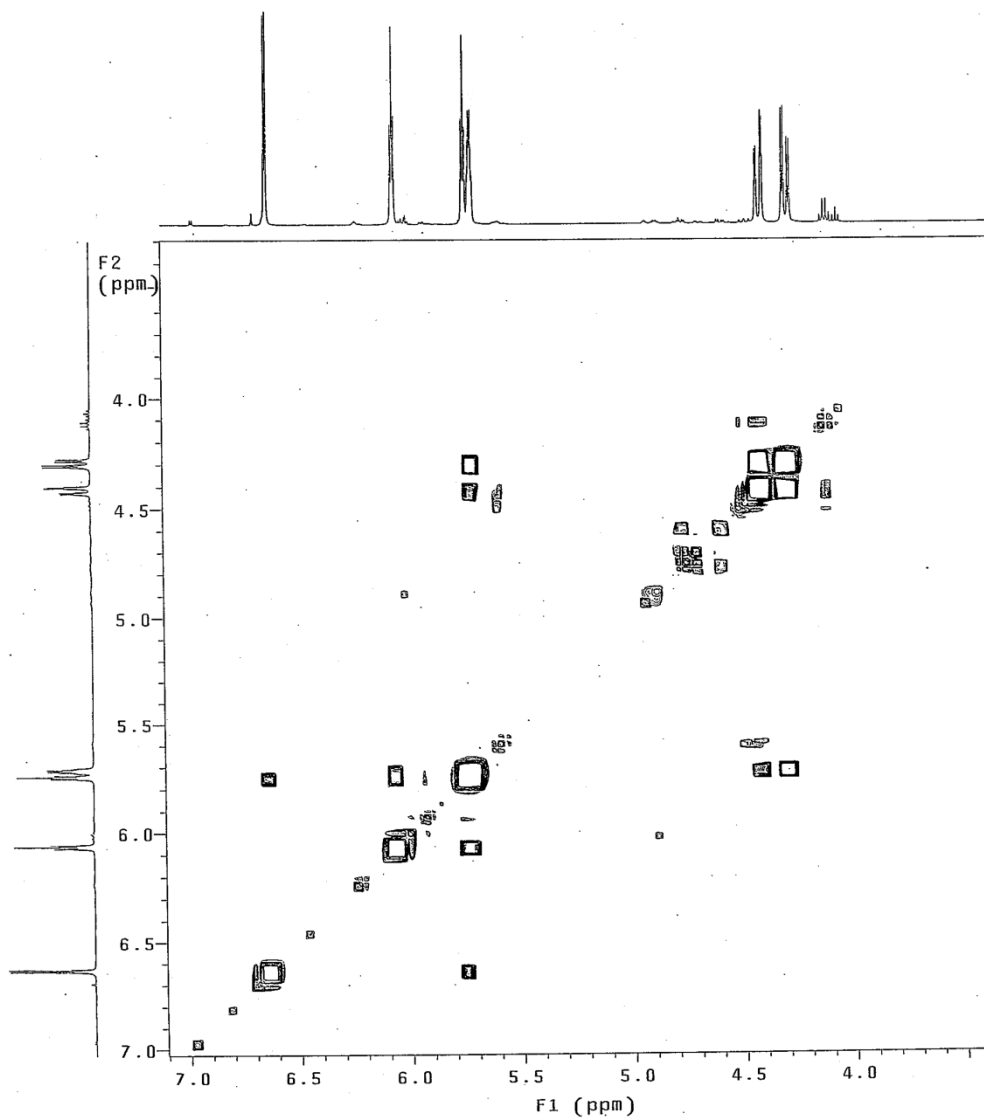

S150

1,2,3,4-tetra-O-benzoyl- $\alpha$ -D-ribofuranoside (**44**):  $^{13}\text{C}$  NMR ( $\text{CDCl}_3$ , 100 MHz)

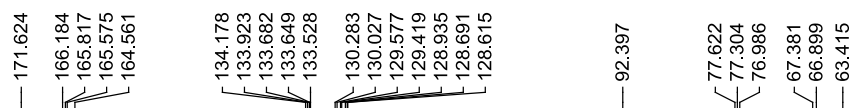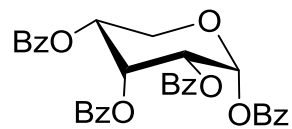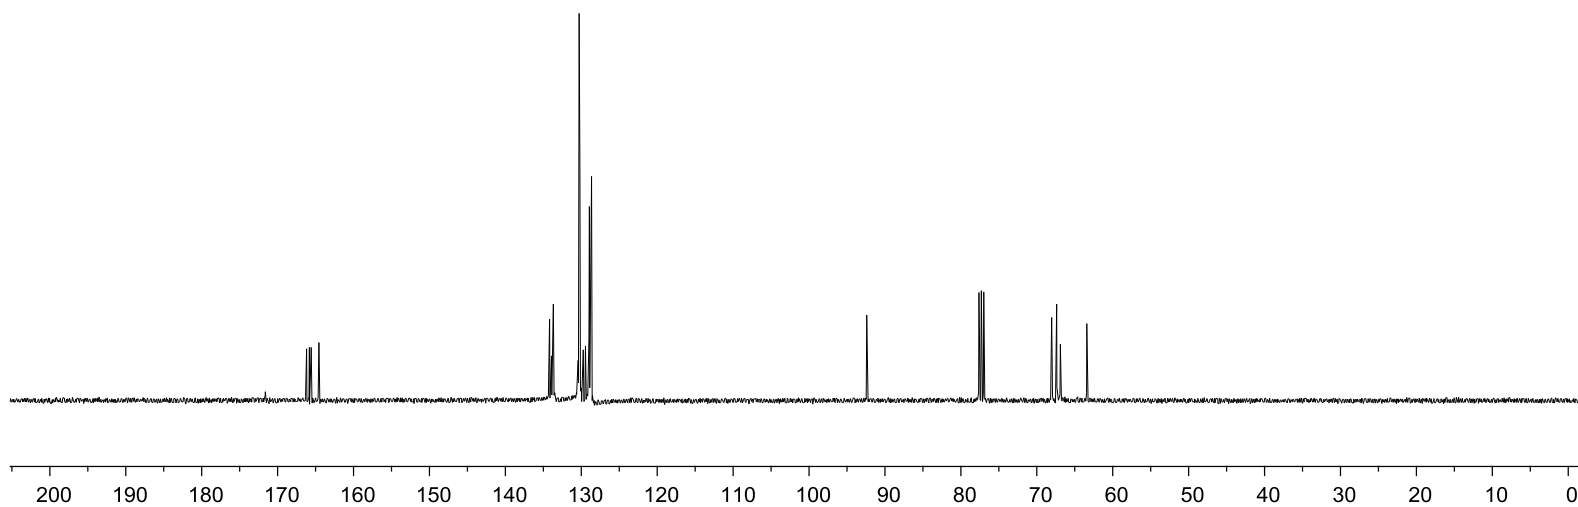

1,2,4-tri-O-benzoyl- $\alpha$ -D-ribofuranose (**45a**):  $^1\text{H}$  NMR ( $\text{CDCl}_3$ , 500 MHz)

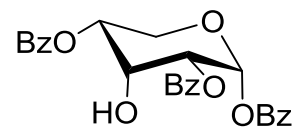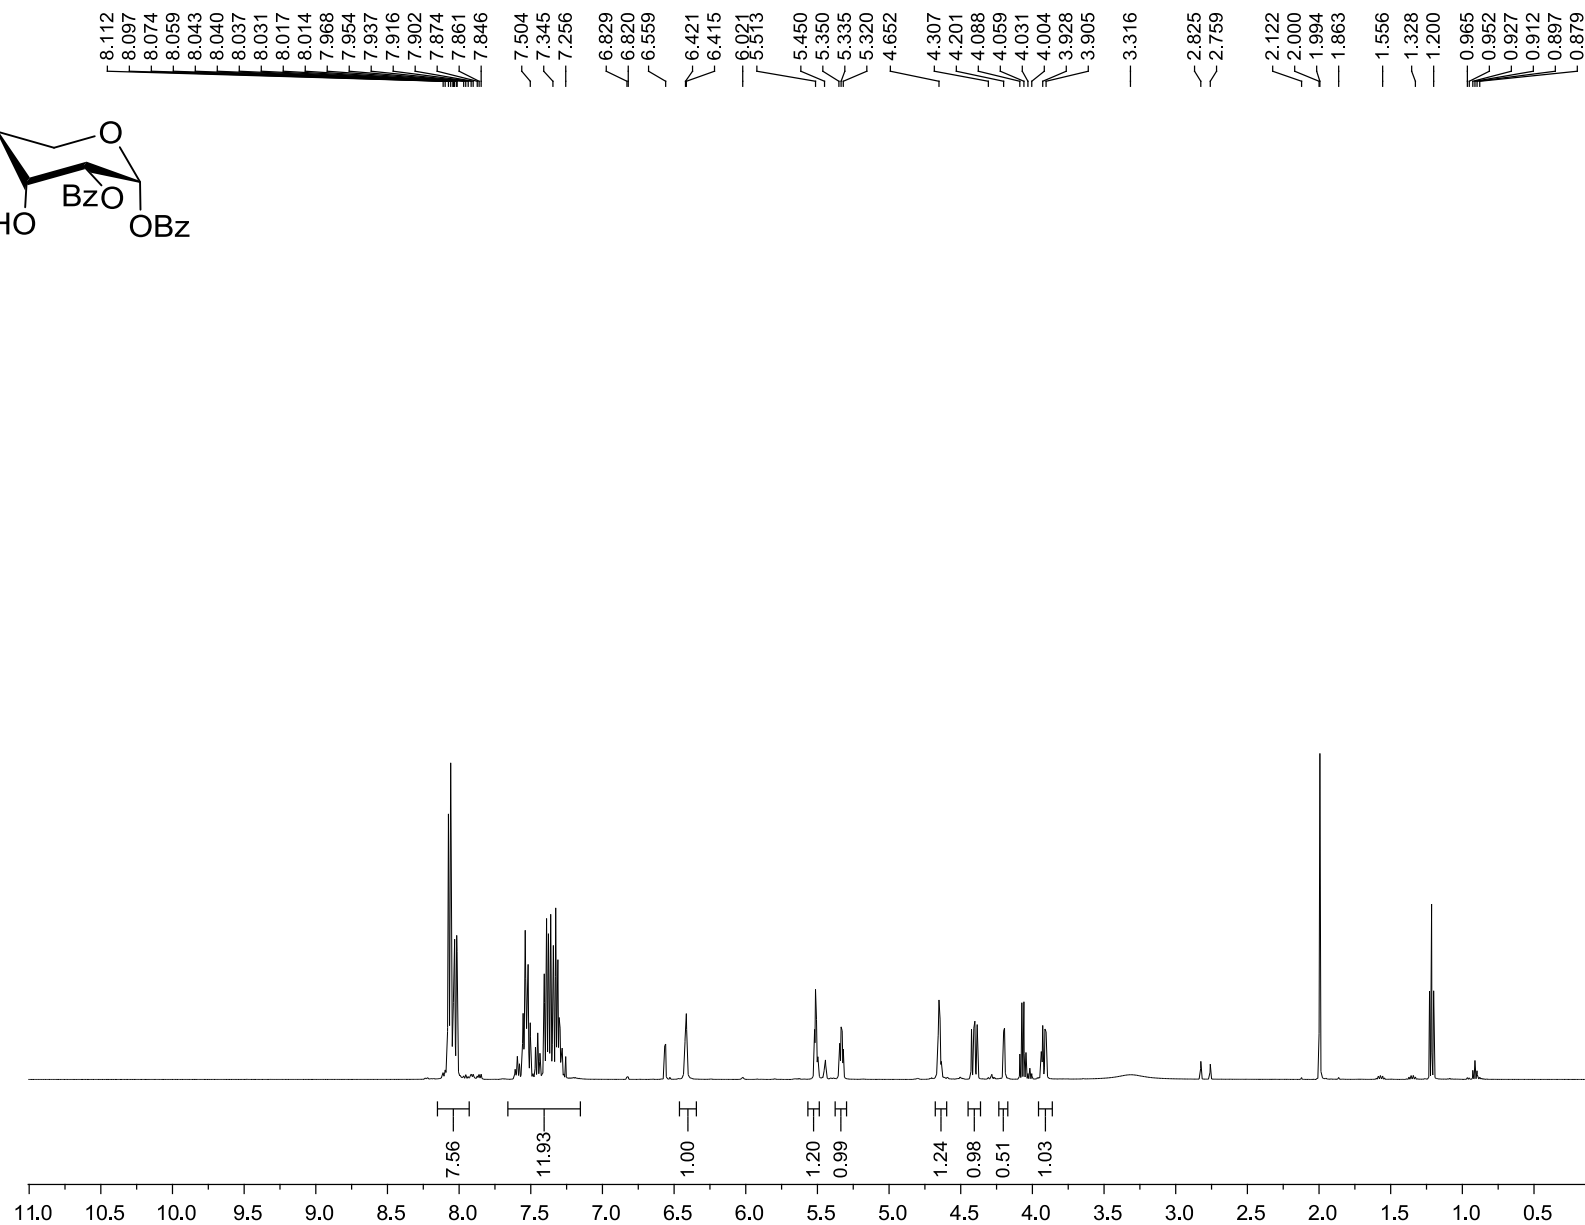

1,2,4-tri-O-benzoyl- $\alpha$ -D-ribofuranoside (**45a**): gCOSY NMR ( $\text{CDCl}_3$ , 500 MHz)

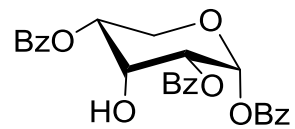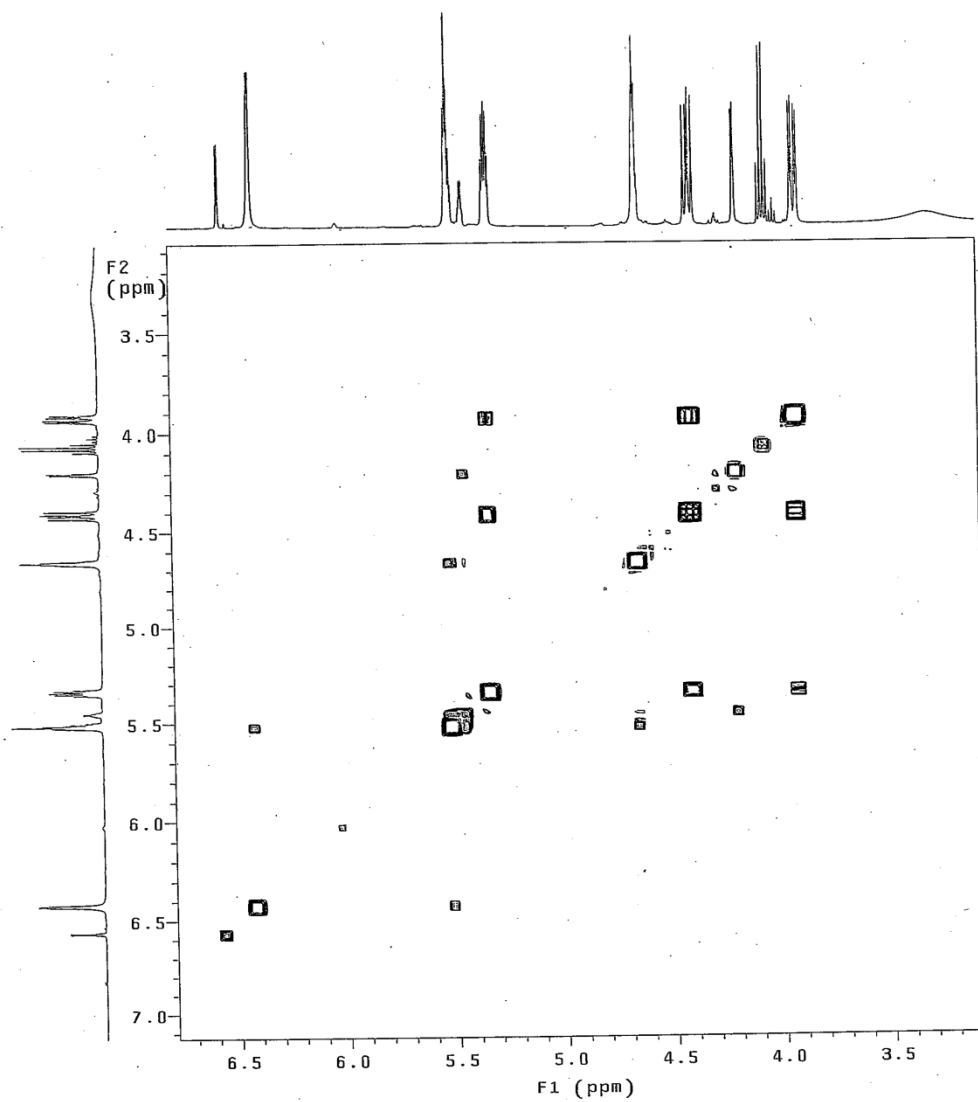

S153

1,2,4-tri-O-benzoyl- $\alpha$ -D-ribofuranose (**45a**):  $^{13}\text{C}$  NMR ( $\text{CDCl}_3$ , 100 MHz)

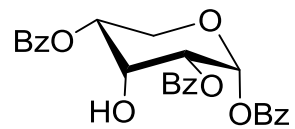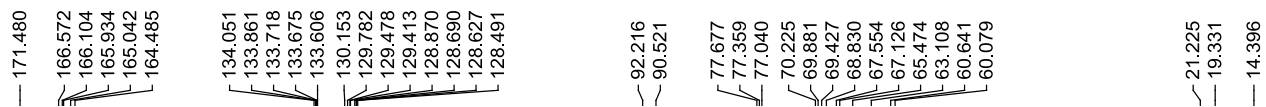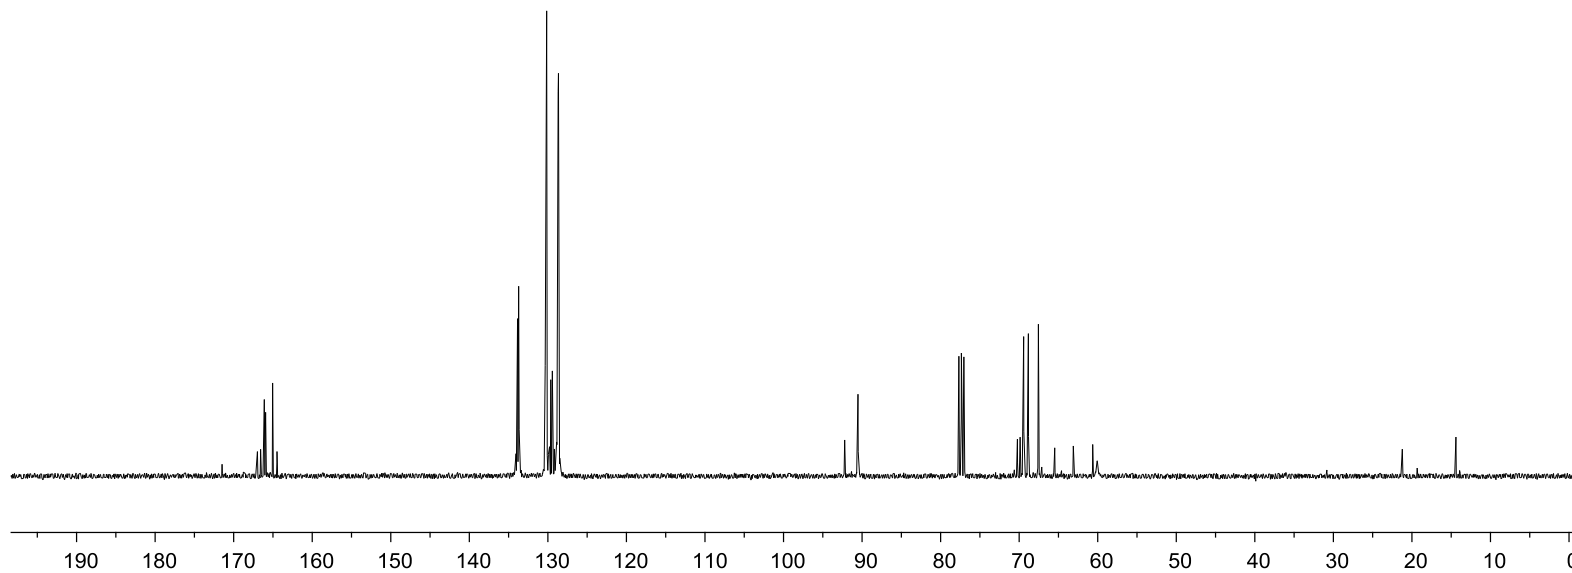

1,3,4-tri-O-benzoyl- $\alpha$ -D-ribofuranoside (**45b**):  $^1\text{H}$  NMR ( $\text{CDCl}_3$ , 500 MHz)

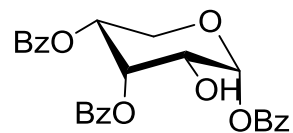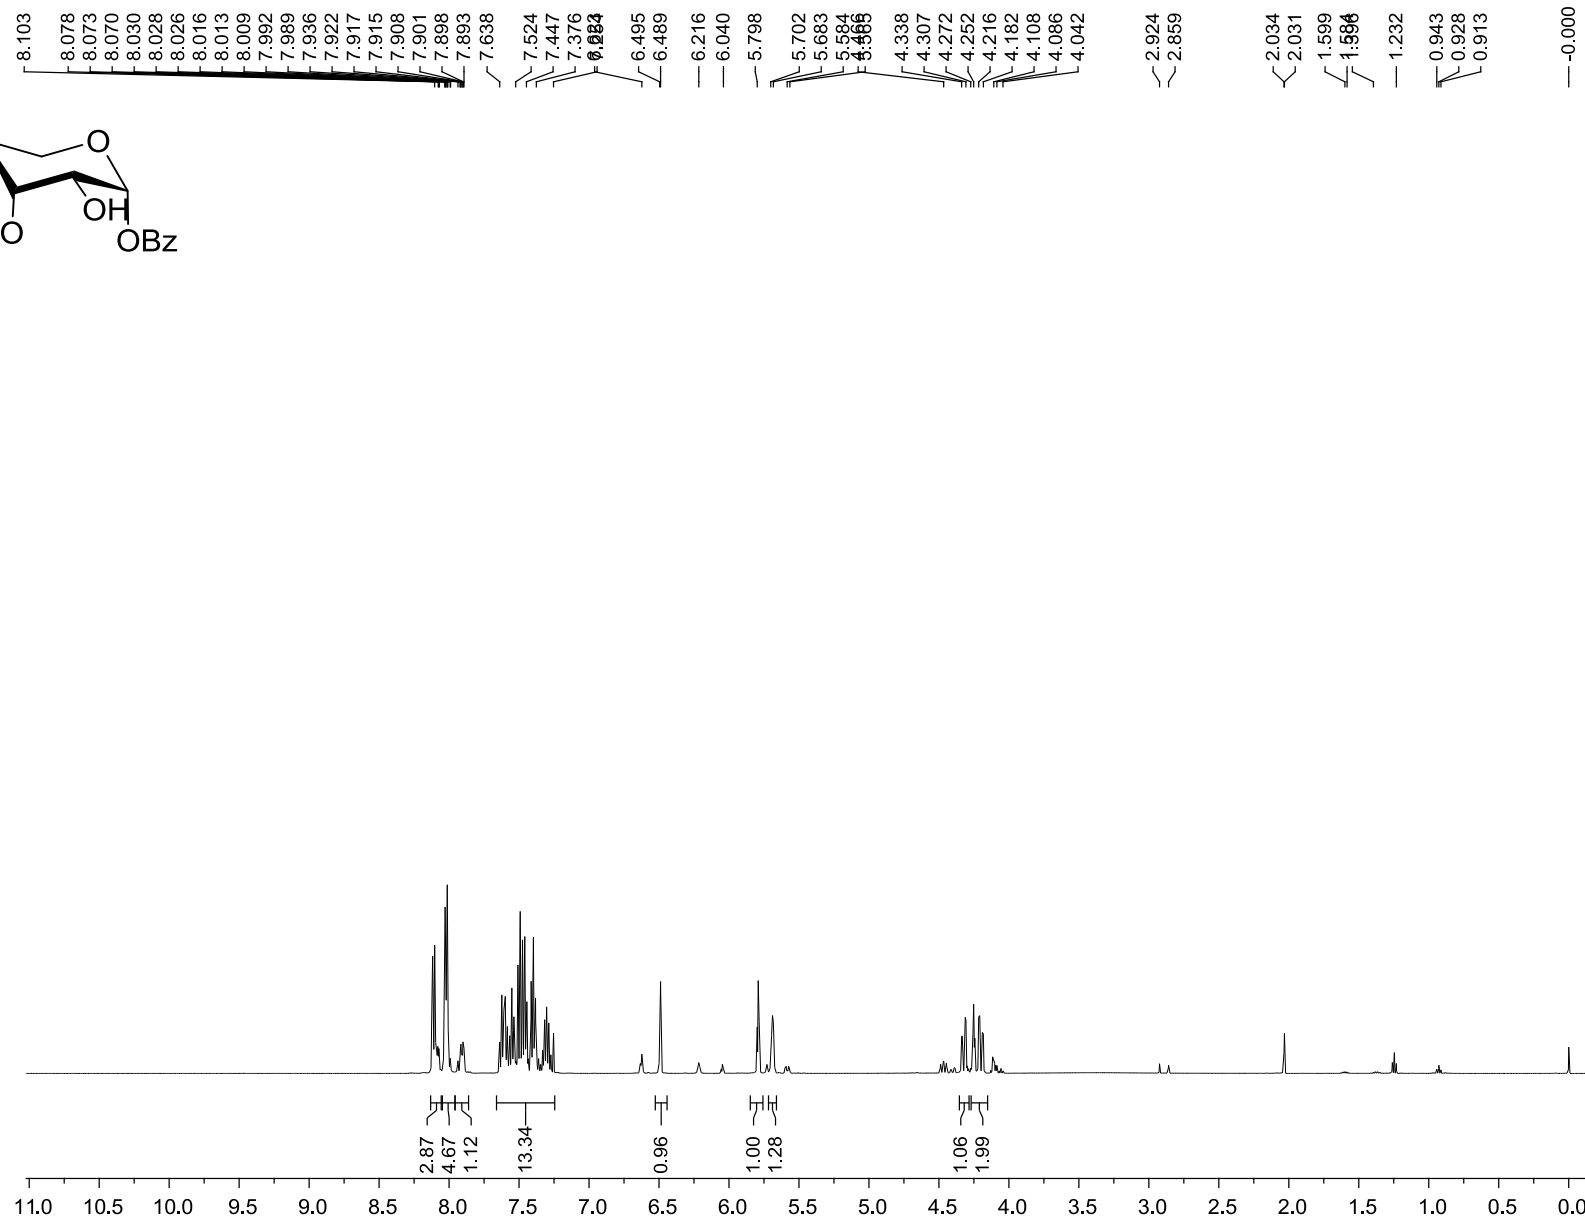

1,3,4-tri-O-benzoyl- $\alpha$ -D-ribofuranose (**45b**): gCOSY NMR ( $\text{CDCl}_3$ , 500 MHz)

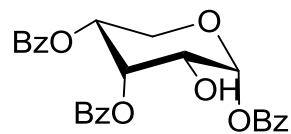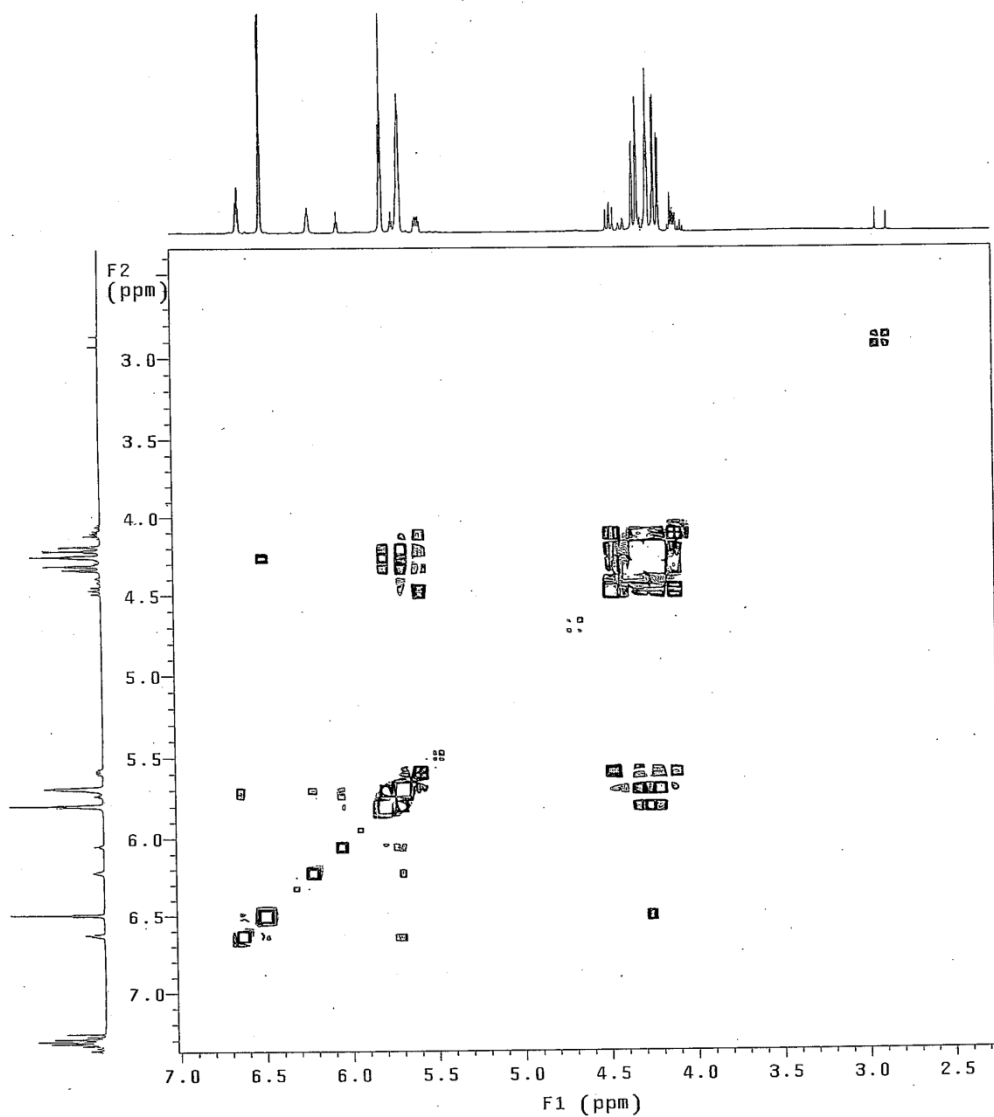

S156



1,3,4-tri-O-benzoyl- $\alpha$ -D-ribofuranose (**45b**):  $^{13}\text{C}$  NMR ( $\text{CDCl}_3$ , 125 MHz)

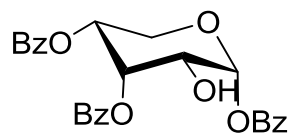

166.108  
165.858  
165.657  
165.361  
164.717  
134.102  
133.903  
133.782  
133.746  
133.648  
133.509  
129.915  
129.421  
128.967  
128.793  
128.670  
128.637  
94.671  
92.384  
89.543  
77.606  
77.288  
76.970  
68.721  
68.044  
66.605  
63.291

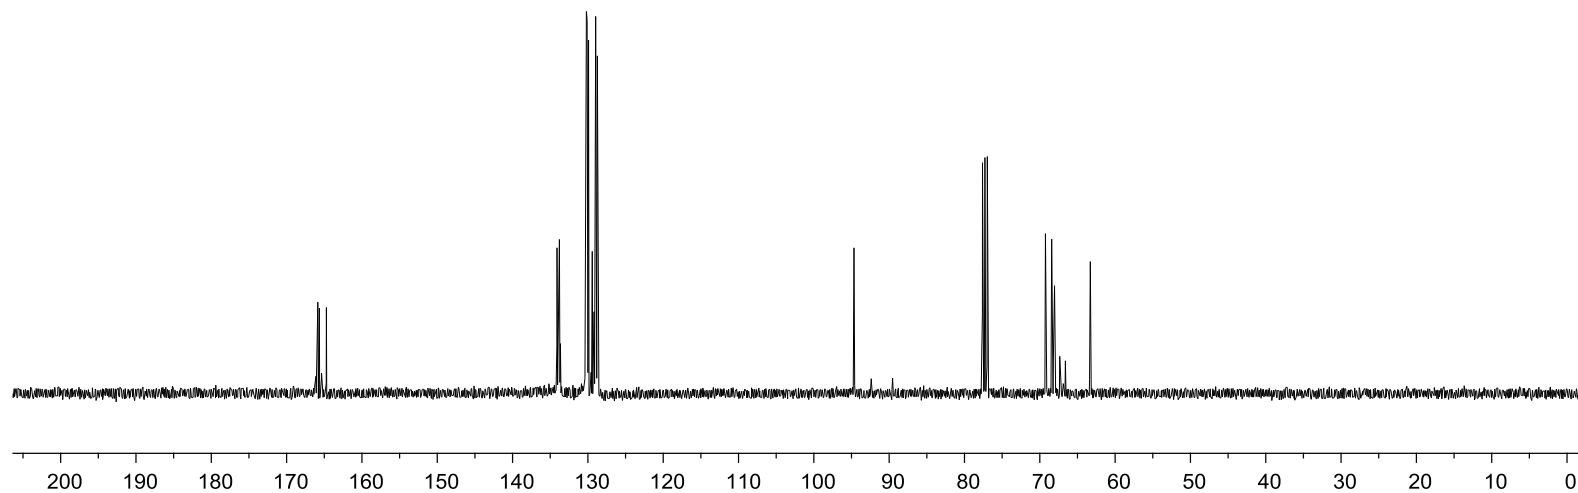

1,2,3-tri-O-benzoyl- $\alpha$ -D-ribofuranoside (**45c**):  $^1\text{H}$  NMR ( $\text{CDCl}_3$ , 500 MHz)

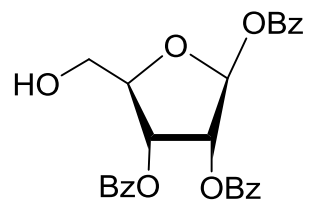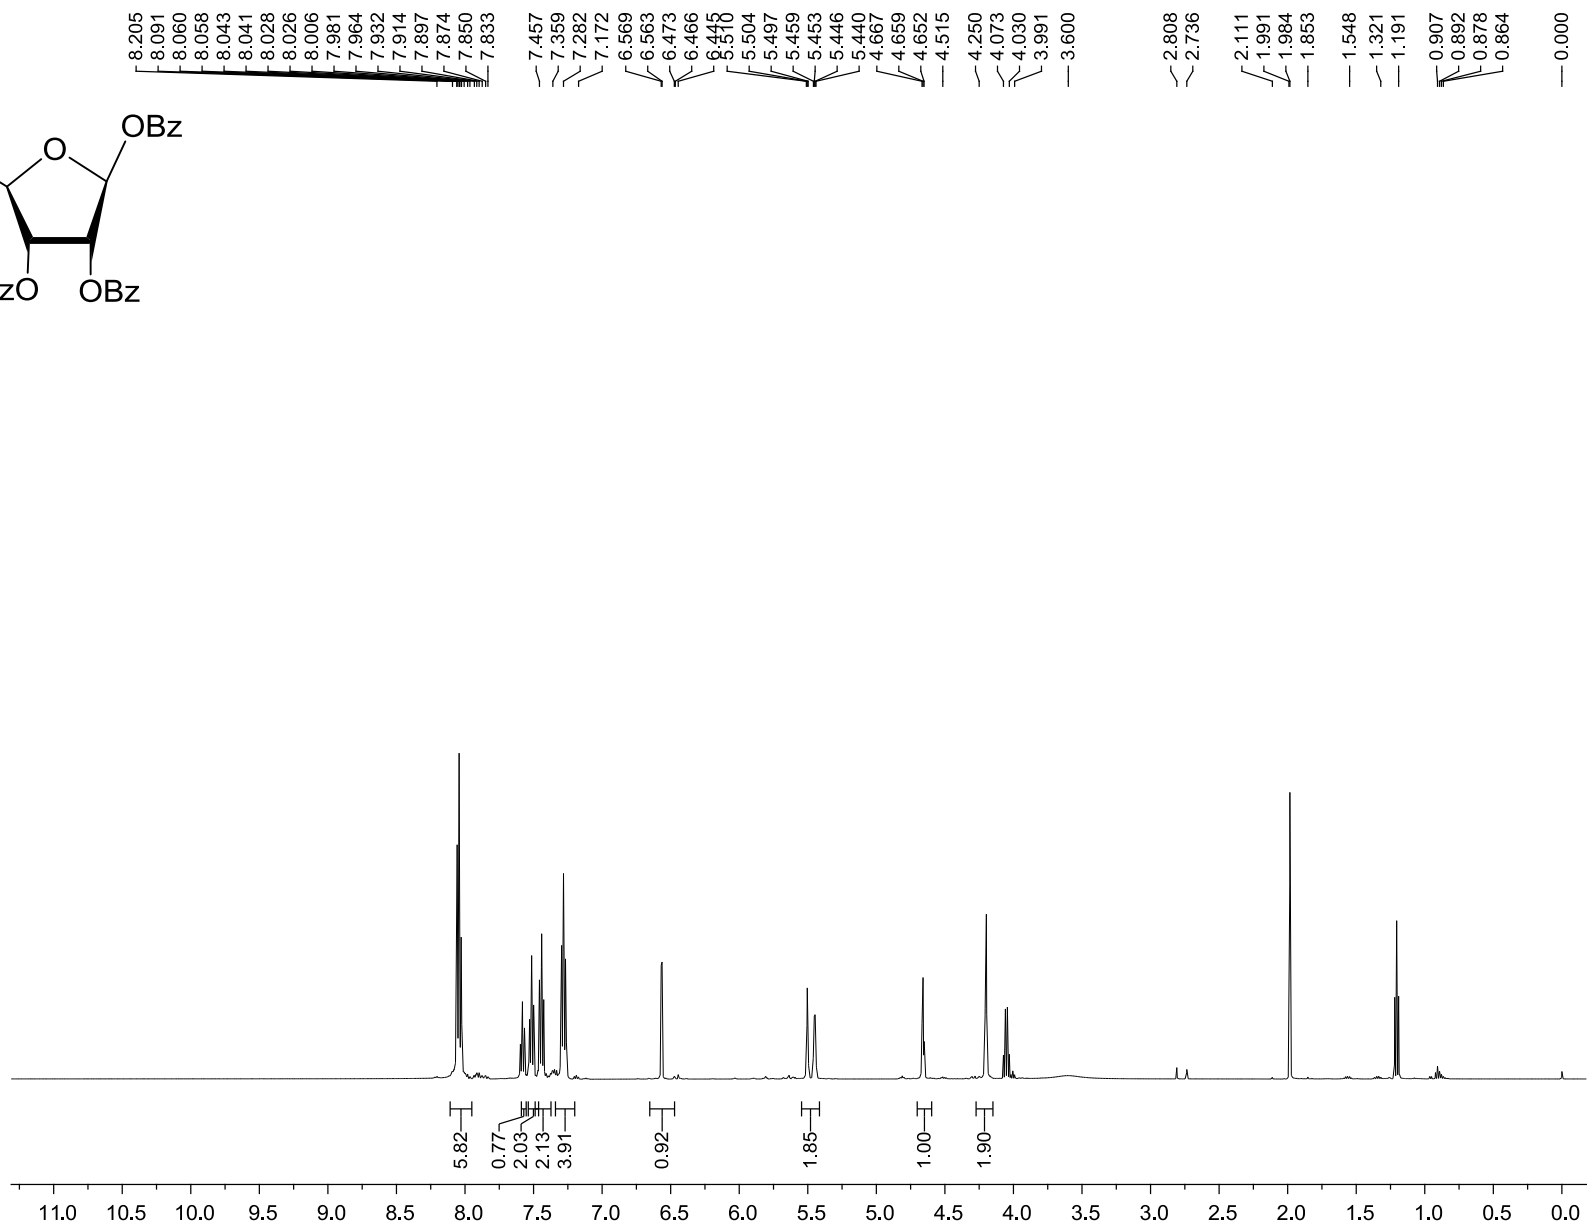

1,2,3-tri-O-benzoyl- $\alpha$ -D-ribofuranoside (**45c**): gCOSY NMR ( $\text{CDCl}_3$ , 500 MHz)

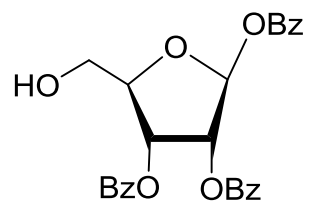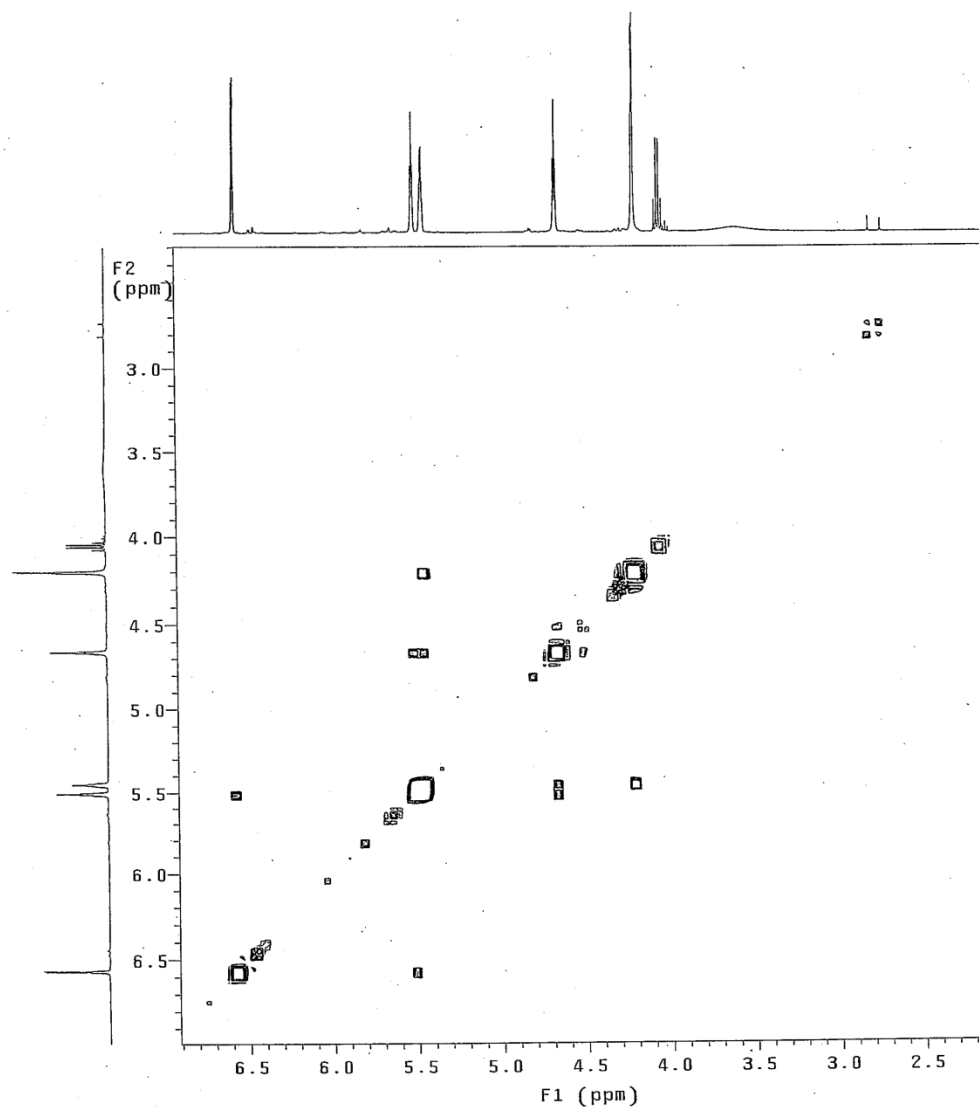

S159

1,2,3-tri-O-benzoyl- $\alpha$ -D-ribofuranoside (**45c**):  $^{13}\text{C}$  NMR ( $\text{CDCl}_3$ , 125 MHz)

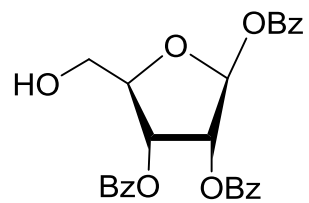

167.037  
166.638  
164.574

134.107  
133.752  
133.640  
130.394  
130.290  
130.224  
129.866  
129.560  
129.244  
128.929  
128.671  
128.640

92.293

77.719  
77.465  
77.210

69.957  
65.534  
63.184  
60.714

21.277

14.458

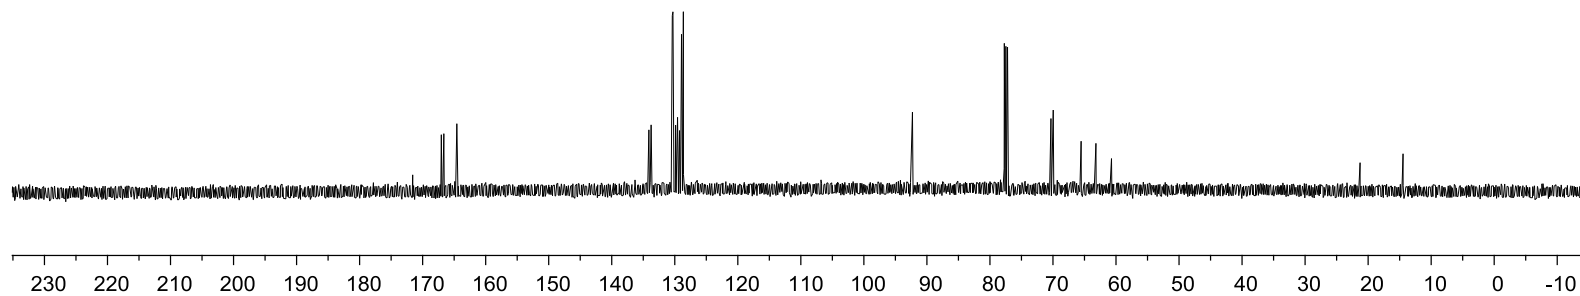

1,2,3-tri-O-benzoyl- $\alpha$ -D-ribofuranose (**45d**):  $^1\text{H}$  NMR ( $\text{CDCl}_3$ , 500 MHz)

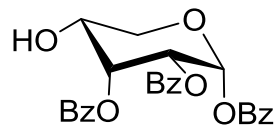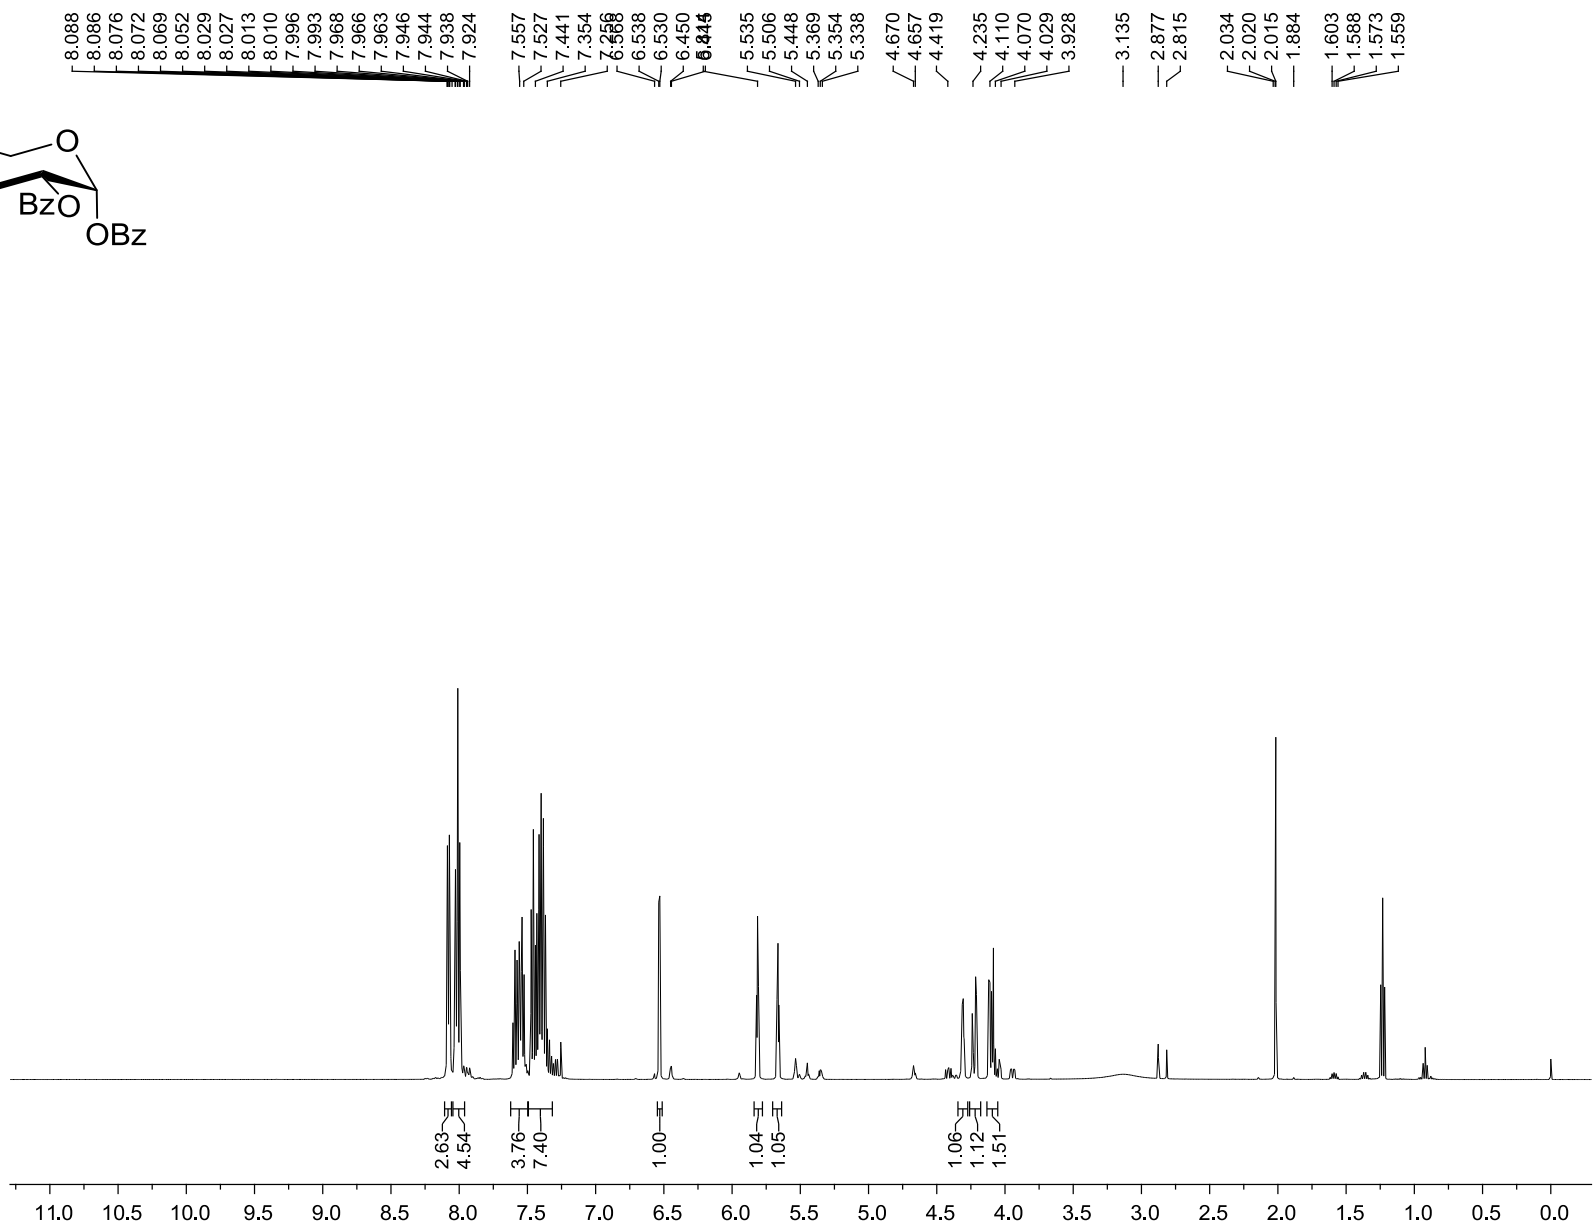

1,2,3-tri-O-benzoyl- $\alpha$ -D-ribofuranose (**45d**): gCOSY NMR ( $\text{CDCl}_3$ , 125 MHz)

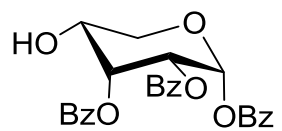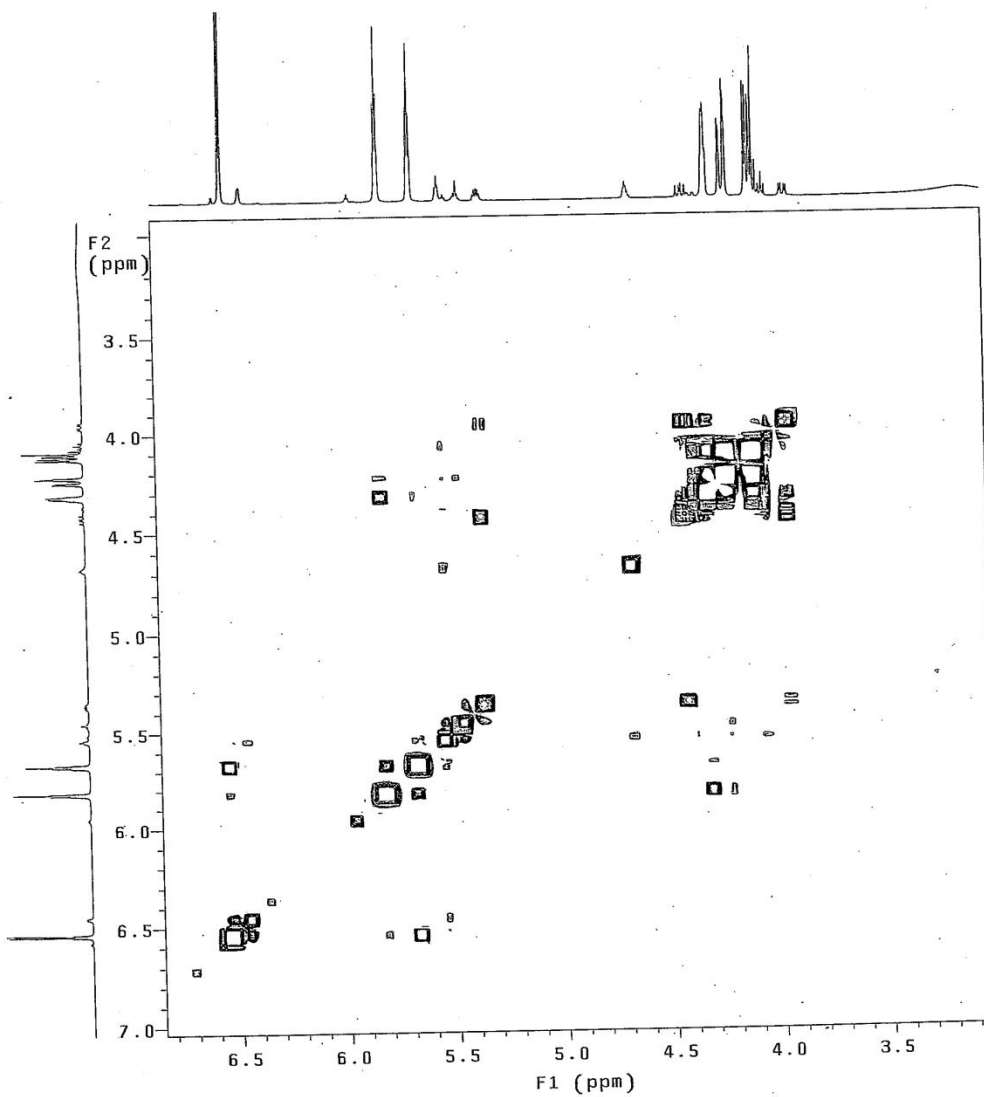

S162

1,2,3-tri-O-benzoyl- $\alpha$ -D-ribofuranose (**45d**):  $^{13}\text{C}$  NMR ( $\text{CDCl}_3$ , 125 MHz)

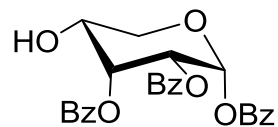

166.072  
165.463  
164.657

134.189  
133.982  
133.845

130.111  
129.498  
129.267  
129.058  
128.969  
128.951  
128.820

92.200

77.663  
77.409  
77.154

69.372  
69.033  
66.930  
66.087

14.482

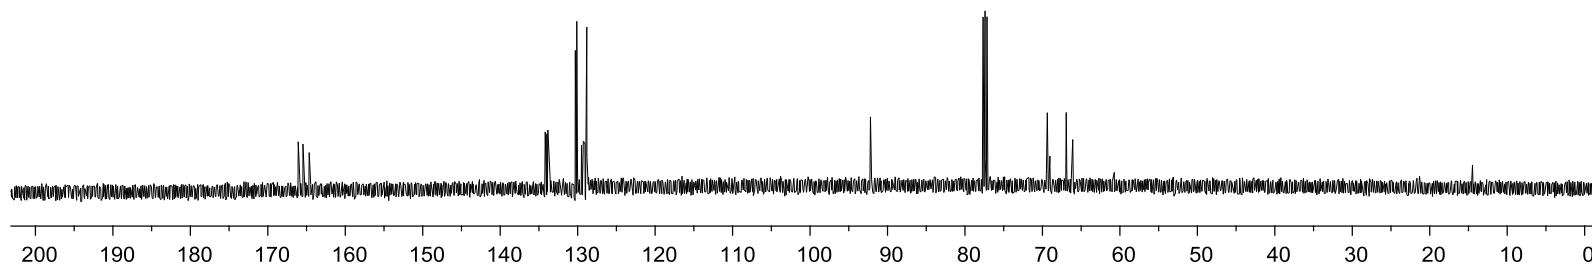

3-deoxy-3-azido-1,2,4-tri-O-benzoyl-D-xylopyranoside (**46**):  $^1\text{H}$  NMR ( $\text{CDCl}_3$ , 500 MHz)

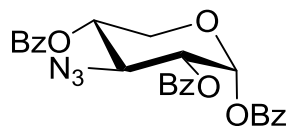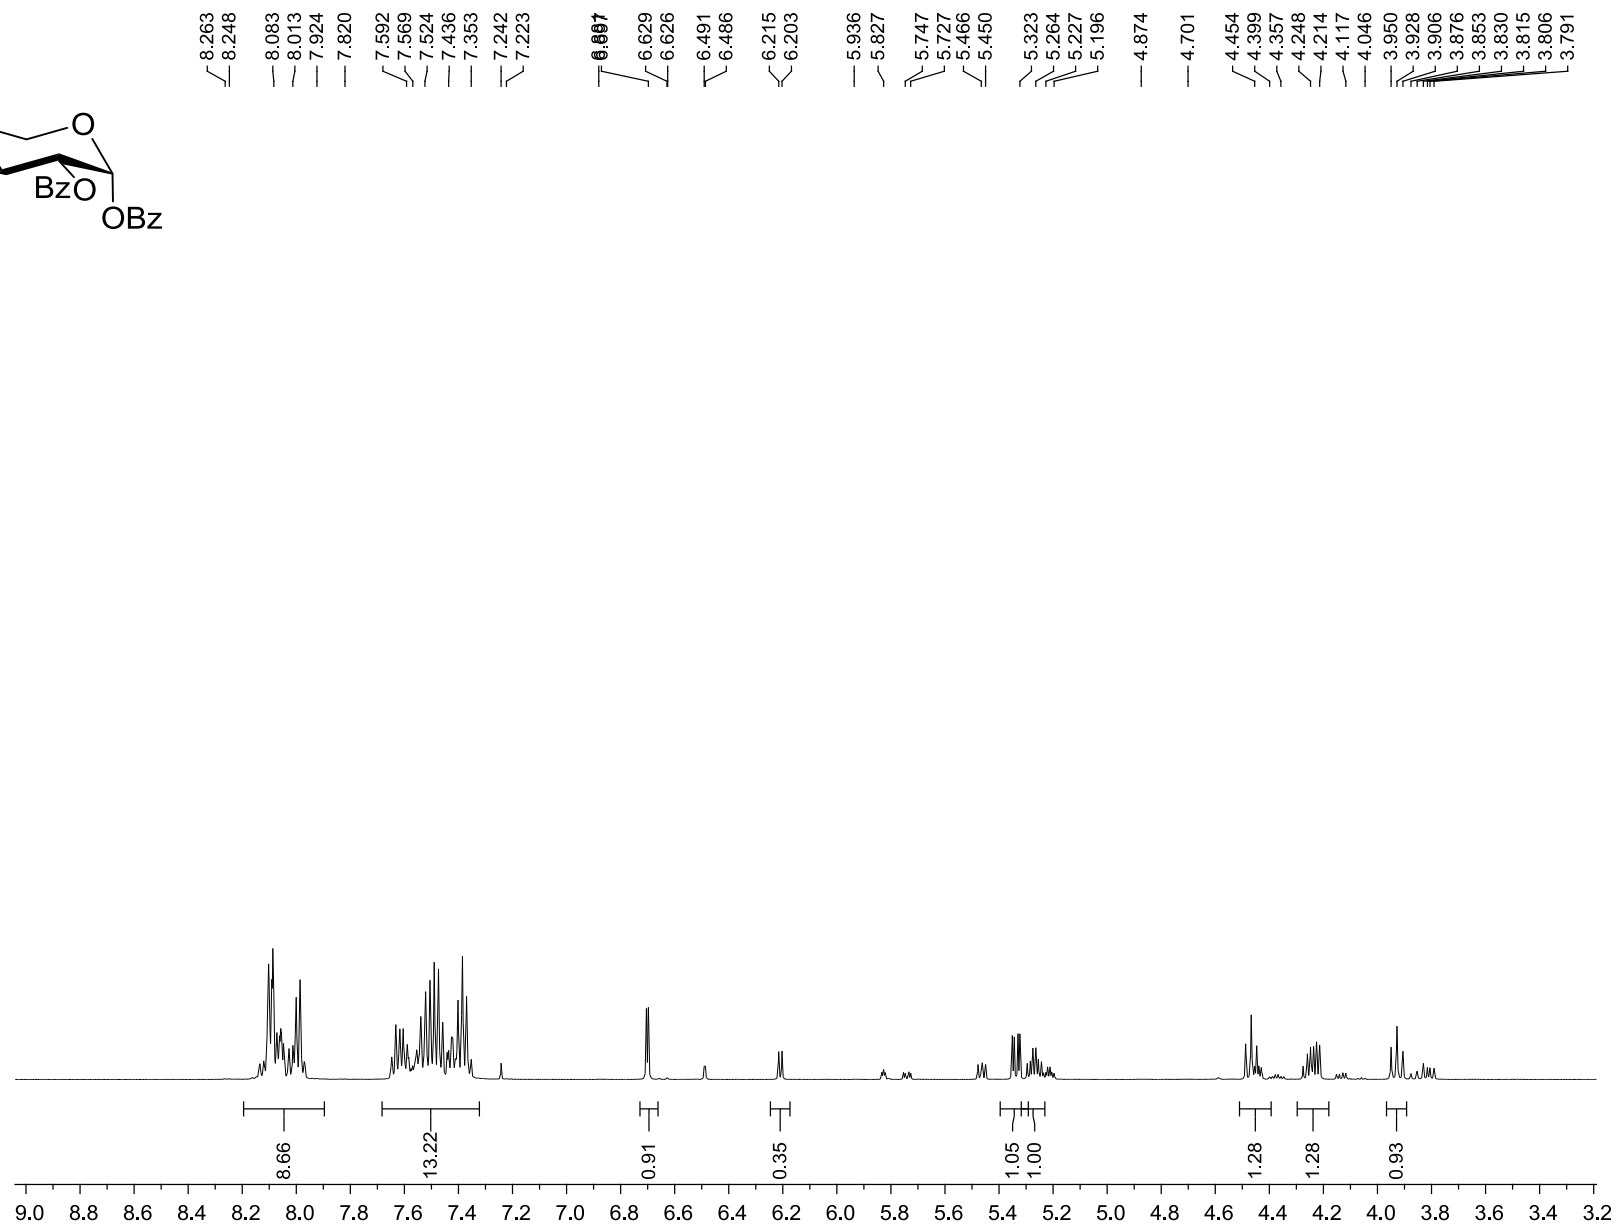



3-deoxy-3-azido-1,2,4-tri-O-benzoyl-D-xylopyranoside (**46**): gCOSY NMR (CDCl<sub>3</sub>, 500 MHz)

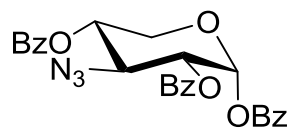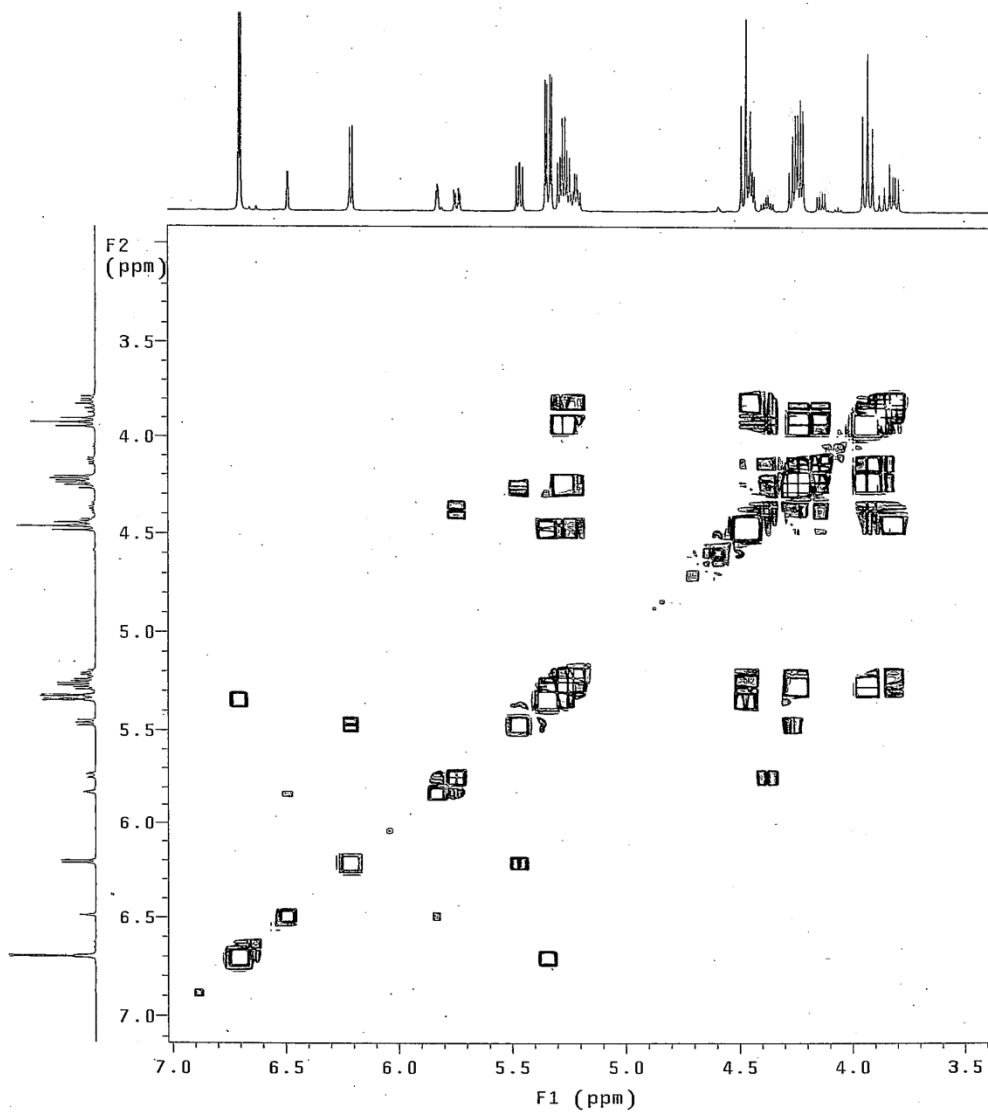

S165

3-deoxy-3-azido-1,2,4-tri-O-benzoyl-D-xylopyranoside (**46**):  $^{13}\text{C}$  NMR ( $\text{CDCl}_3$ , 125 MHz)

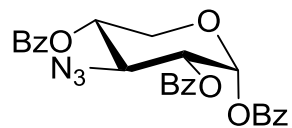

165.685  
165.670  
165.535  
165.427  
165.360  
165.278  
164.976  
164.693  
164.300  
134.183  
134.059  
134.035  
133.998  
133.959  
133.889  
130.158  
129.204  
129.052  
128.998  
128.913  
128.866  
128.806

92.848  
91.795  
89.897

77.651  
77.396  
77.142  
70.207  
68.856

61.324  
56.773

34.968  
31.875

25.588  
22.951  
21.015

14.436

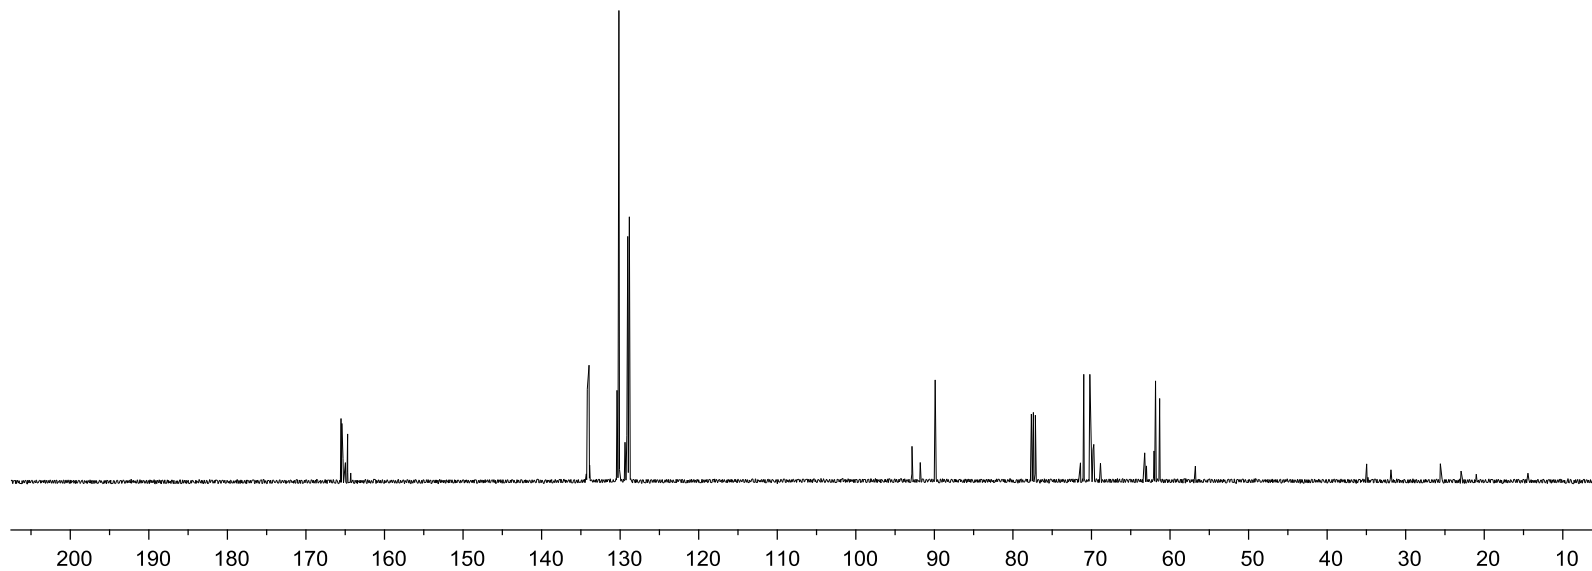

S166

(2-chloro-4-nitrophenyl)-3-deoxy-3-azido-2,4-di-O-benzoyl- $\beta$ -D-xylopyranoside (**47**):  $^1\text{H}$  NMR ( $\text{CDCl}_3$ , 500 MHz)

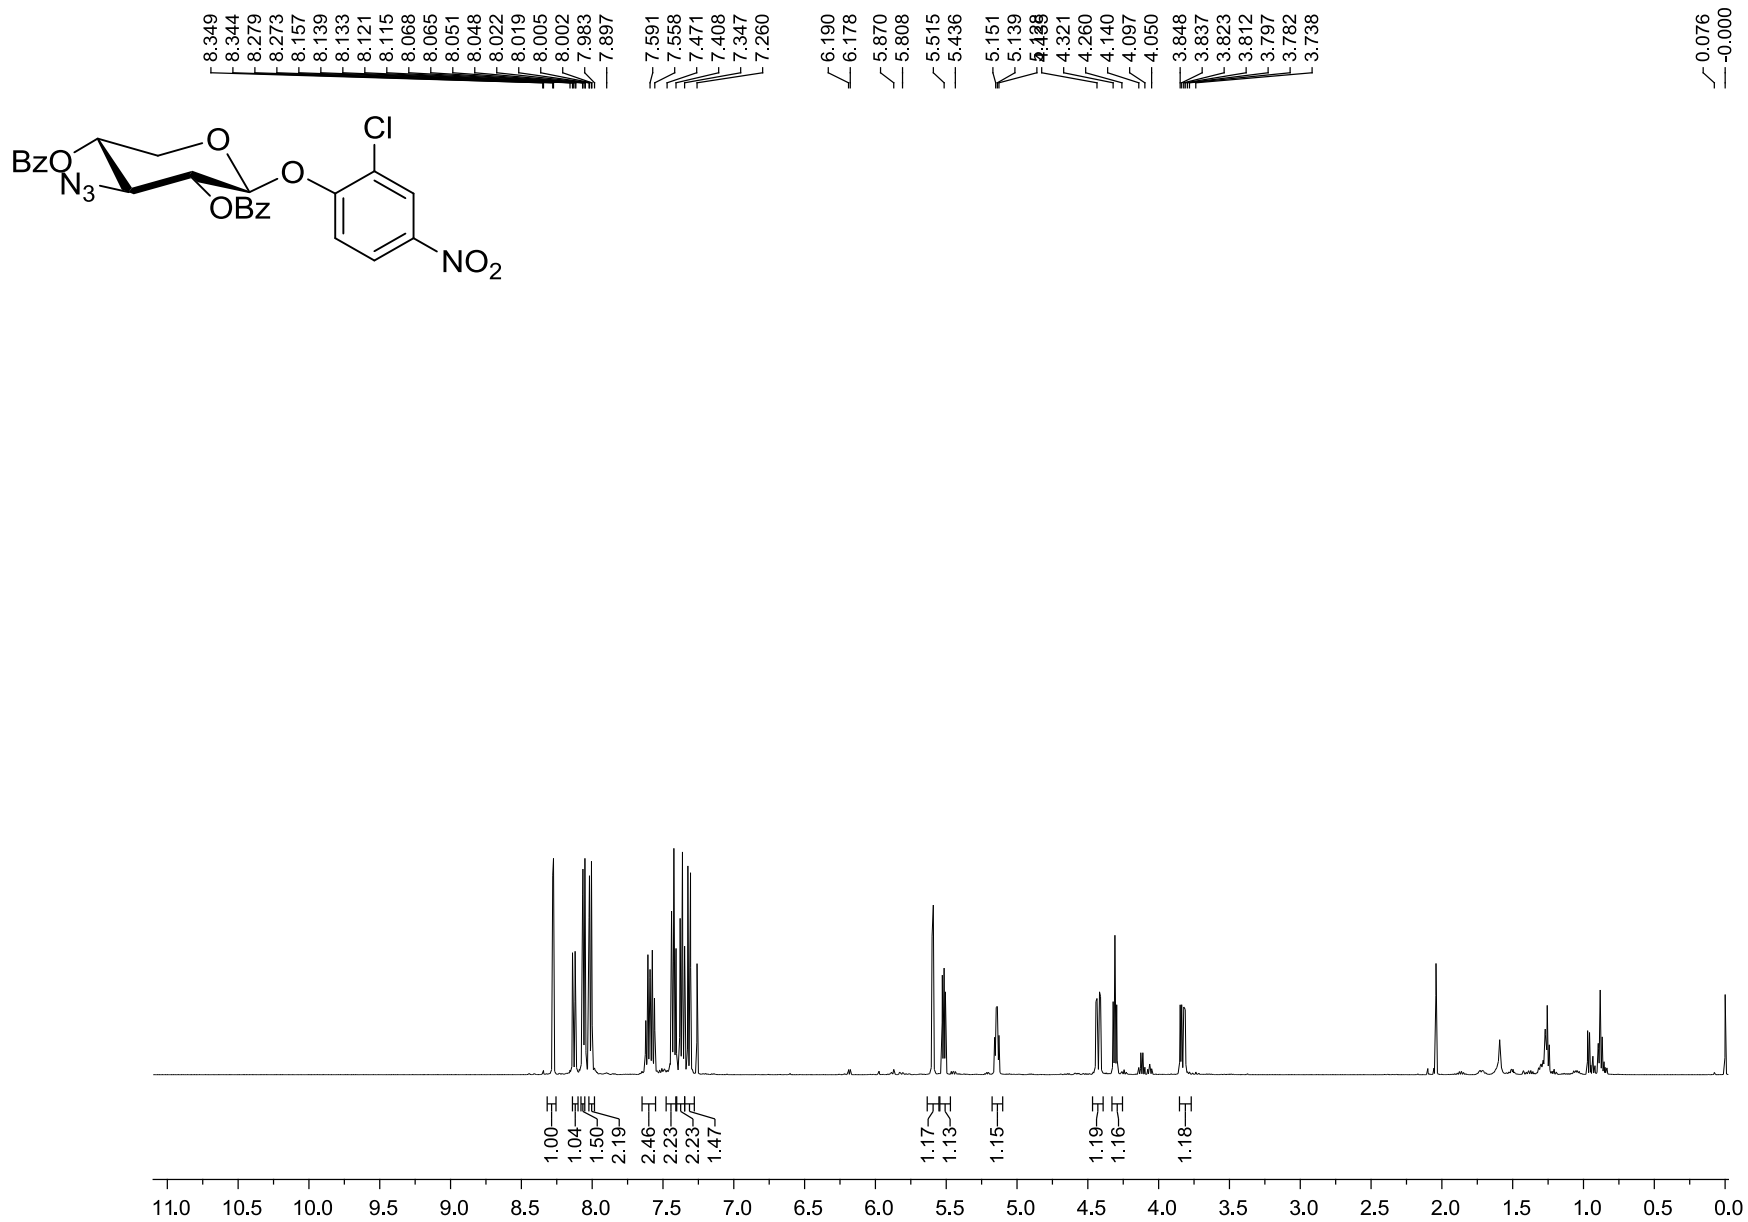

(2-chloro-4-nitrophenyl)-3-deoxy-3-azido-2,4-di-O-benzoyl- $\beta$ -D-xylopyranoside (**47**): gCOSY NMR ( $\text{CDCl}_3$ , 500 MHz)

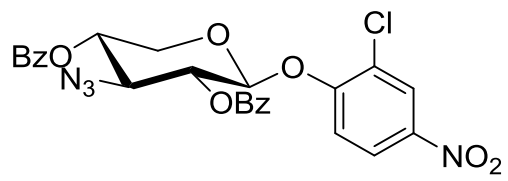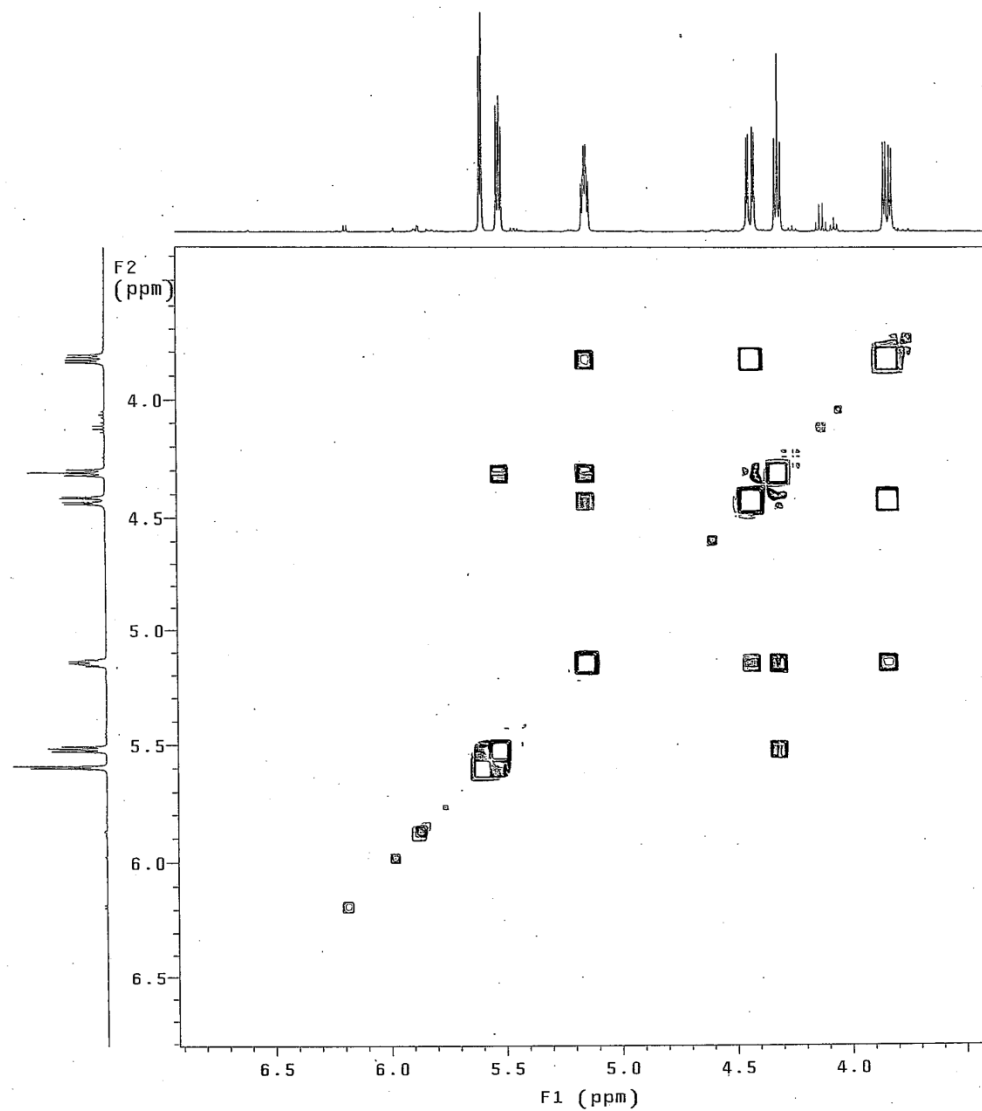

(2-chloro-4-nitrophenyl)-3-deoxy-3-azido-2,4-di-O-benzoyl- $\beta$ -D-xylopyranoside (**47**):  $^{13}\text{C}$  NMR ( $\text{CDCl}_3$ , 125 MHz)

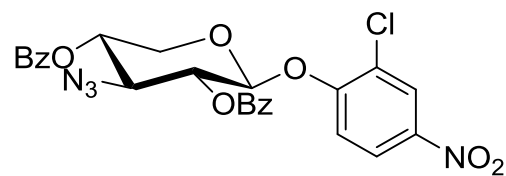

165.693  
165.236  
157.167  
143.208  
134.052  
134.015  
130.206  
128.858  
126.509  
123.880  
116.263  
98.336  
77.564  
77.310  
77.055  
69.102  
68.949  
61.723  
59.690  
31.866  
14.403

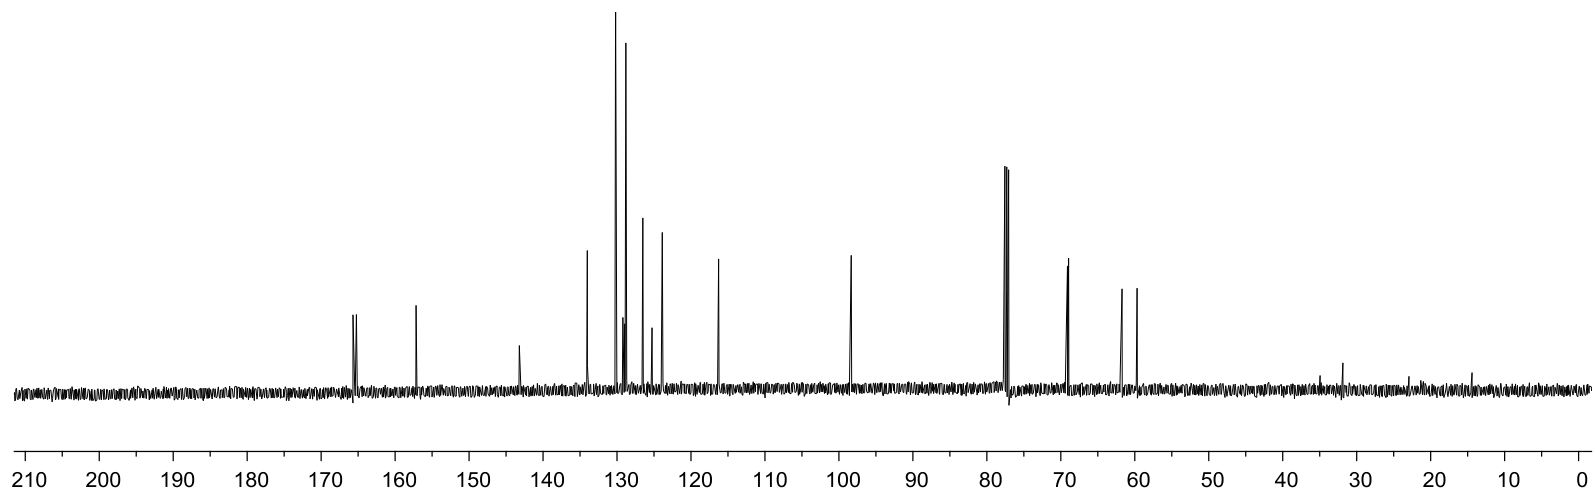

S169

1-bromo-2,3,4-tri-O-benzoyl- $\beta$ -L-arabinopyranoside (**48**):  $^1\text{H}$  NMR ( $\text{CDCl}_3$ , 500 MHz)

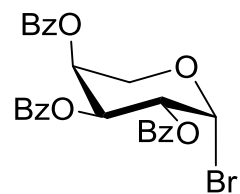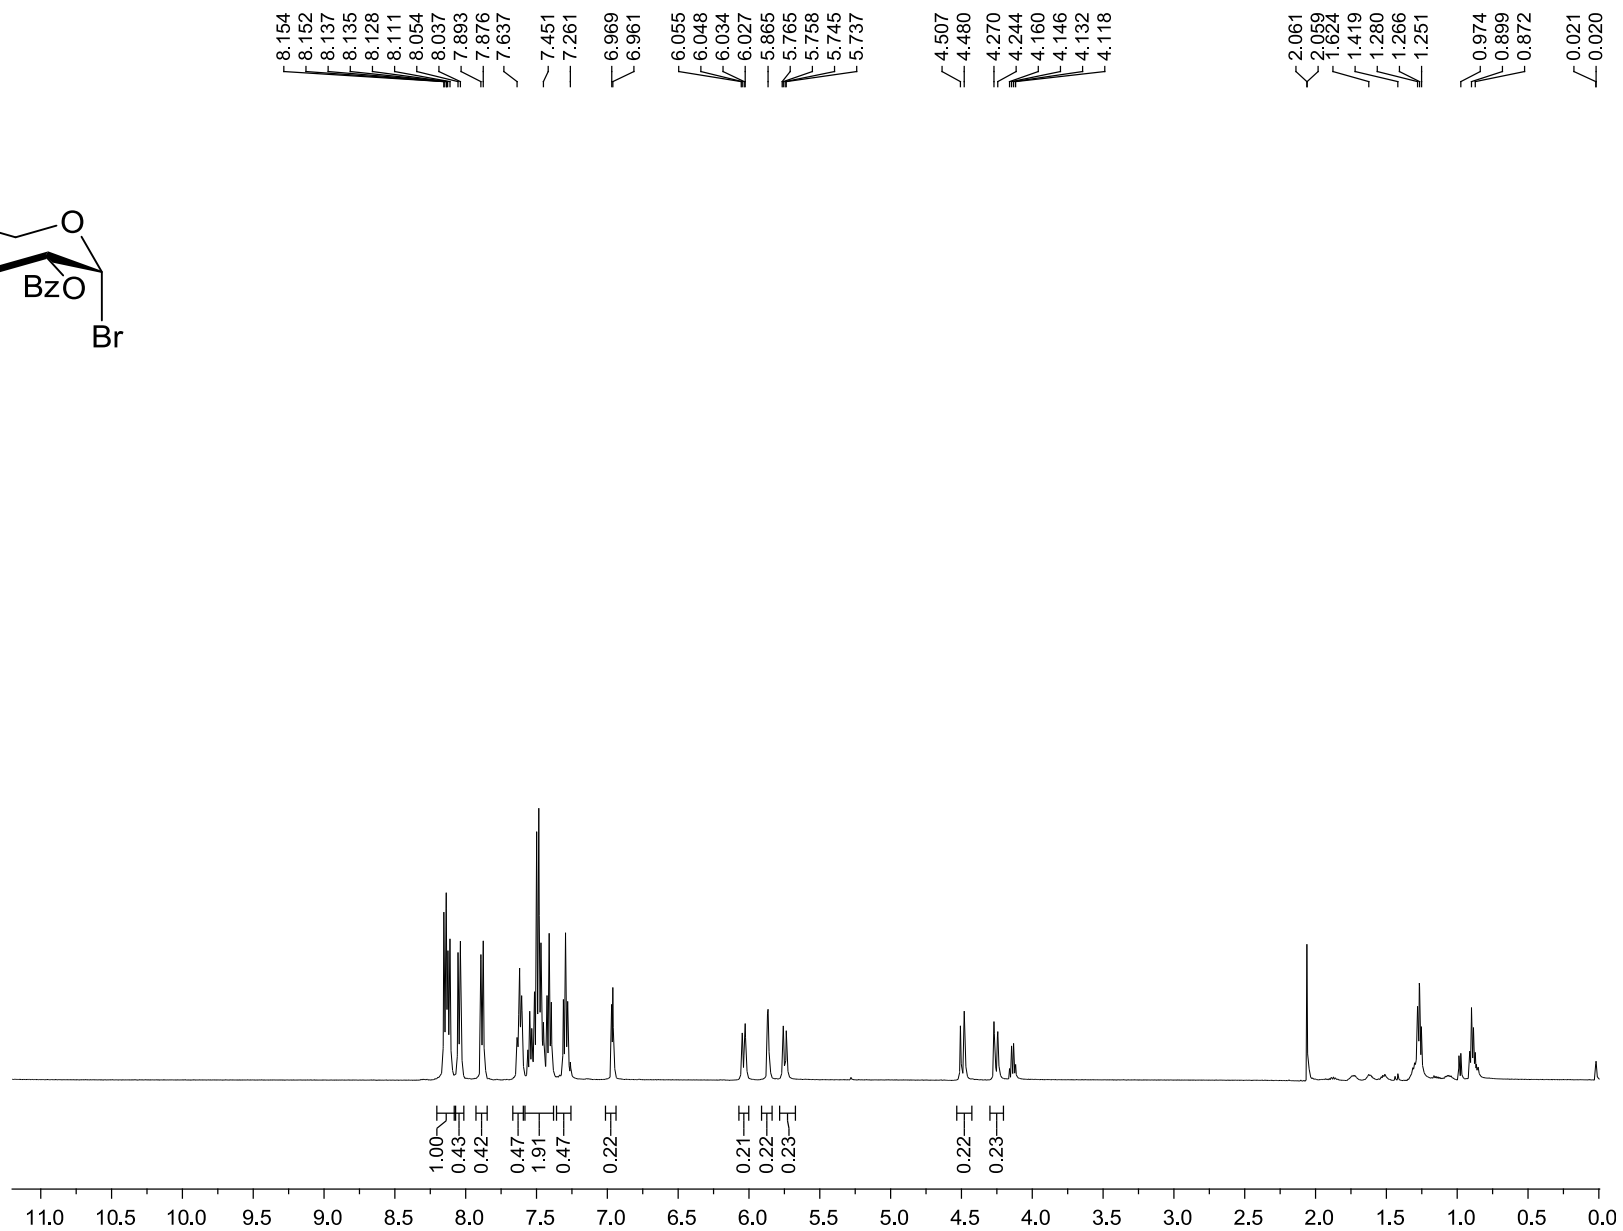

1-bromo-2,3,4-tri-O-benzoyl- $\beta$ -L-arabinopyranoside (**48**):  $^{13}\text{C}$  NMR ( $\text{CDCl}_3$ , 100 MHz)

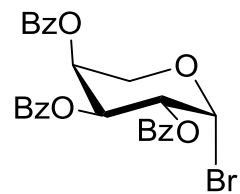

— 172.226  
— 165.588  
— 165.551  
— 165.438  
  
— 133.772  
— 133.634  
— 133.398  
— 129.878  
— 129.191  
— 128.581  
— 128.370  
  
— 109.986  
  
— 89.800  
  
— 77.397  
— 77.079  
— 76.761  
— 68.683  
— 68.562  
— 65.013  
— 60.486

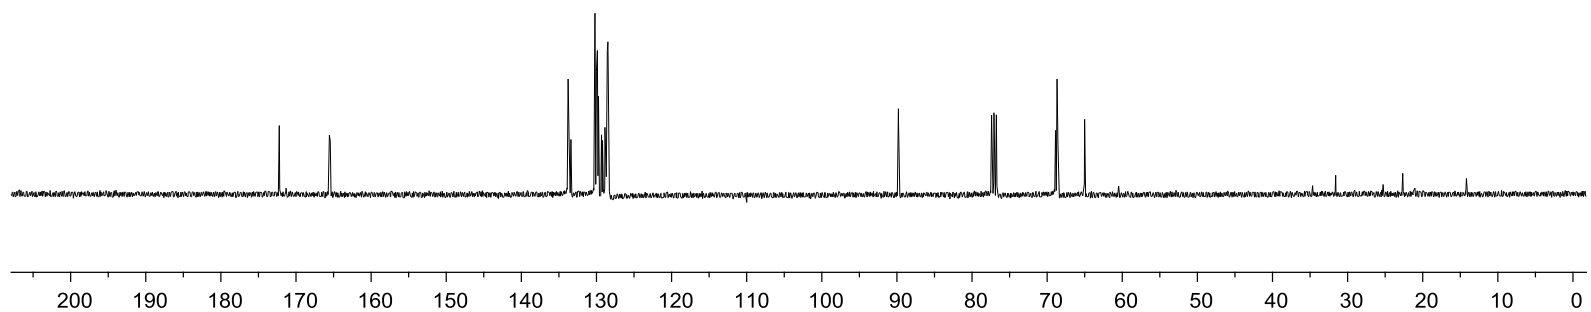

1-bromo-2,3,4-tri-O-benzoyl- $\alpha$ -D-arabinopyranoside (**49**):  $^1\text{H}$  NMR ( $\text{CDCl}_3$ , 400 MHz)

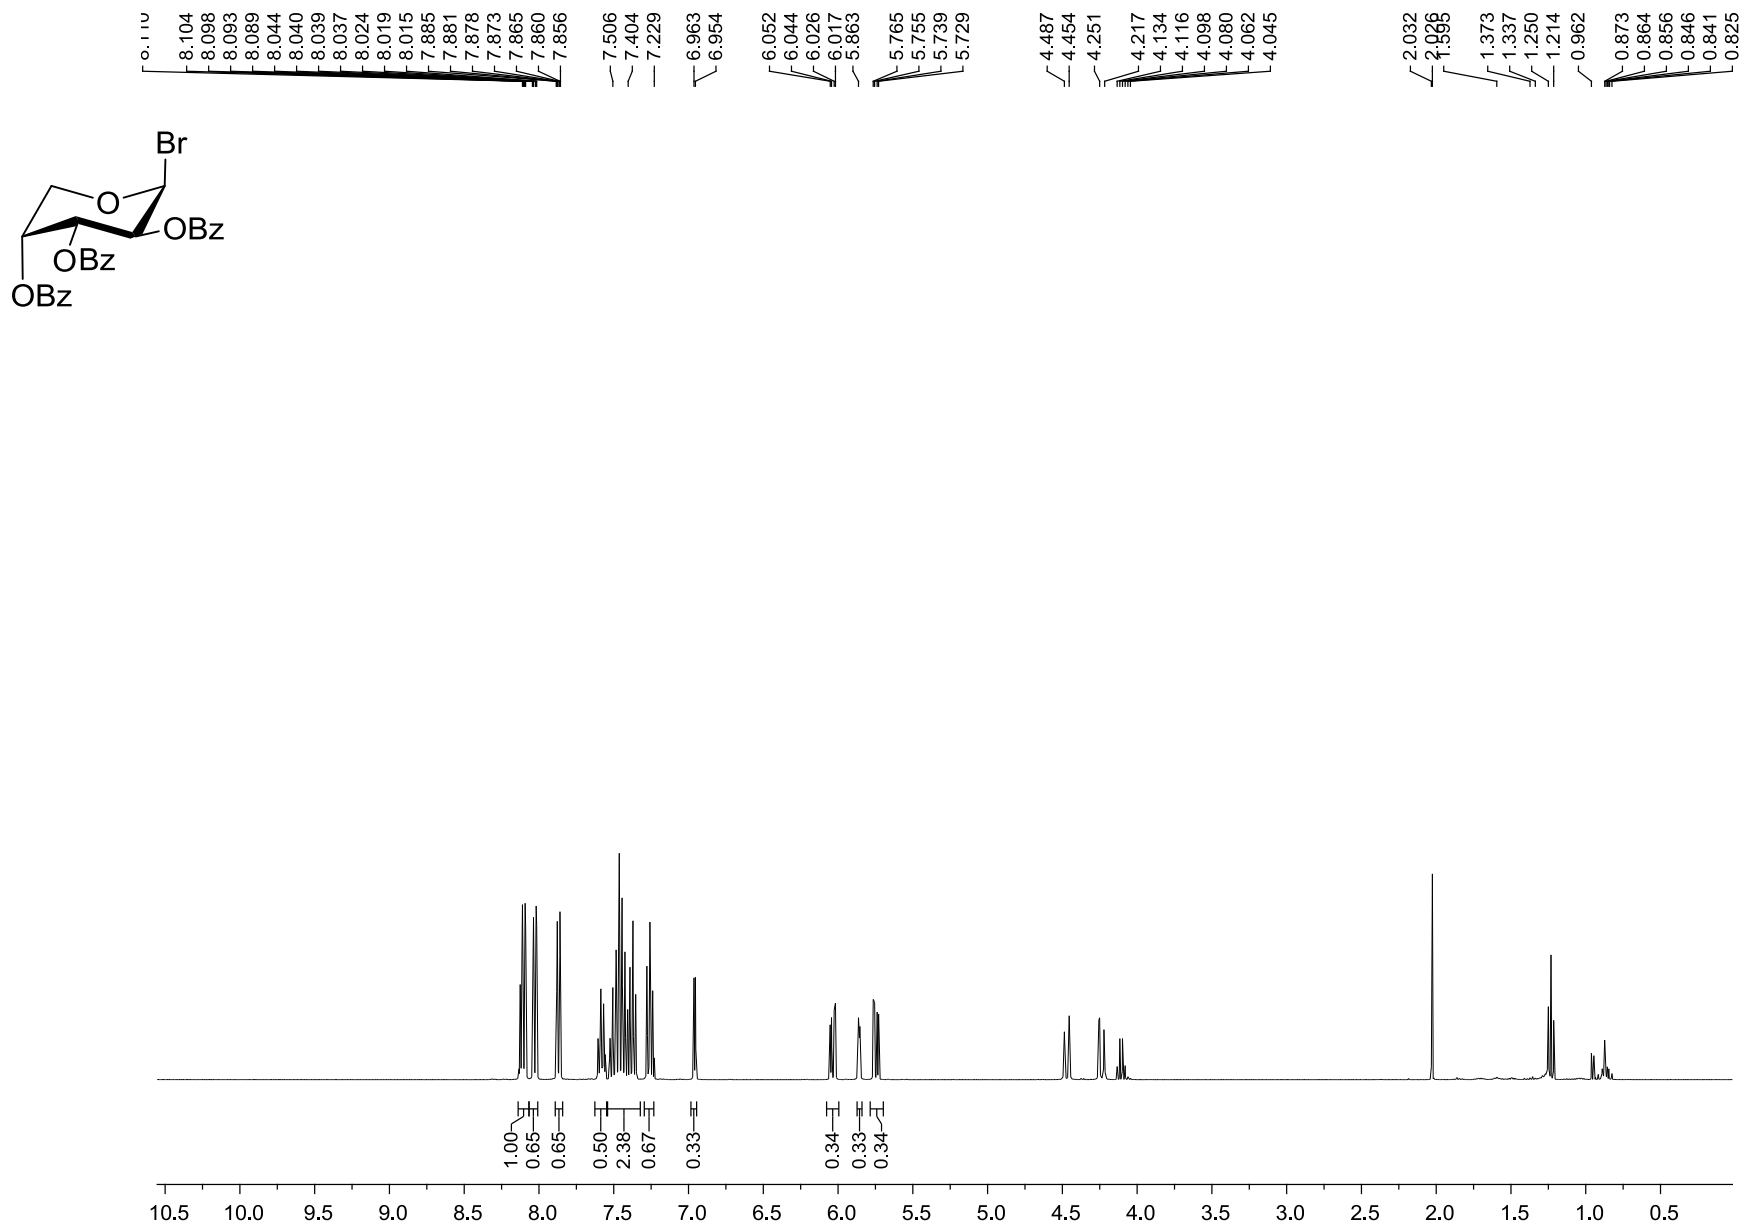



1-bromo-2,3,4-tri-O-benzoyl- $\alpha$ -D-arabinopyranoside (**49**): gCOSY NMR (CDCl<sub>3</sub>, 400 MHz)

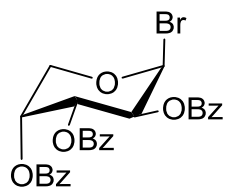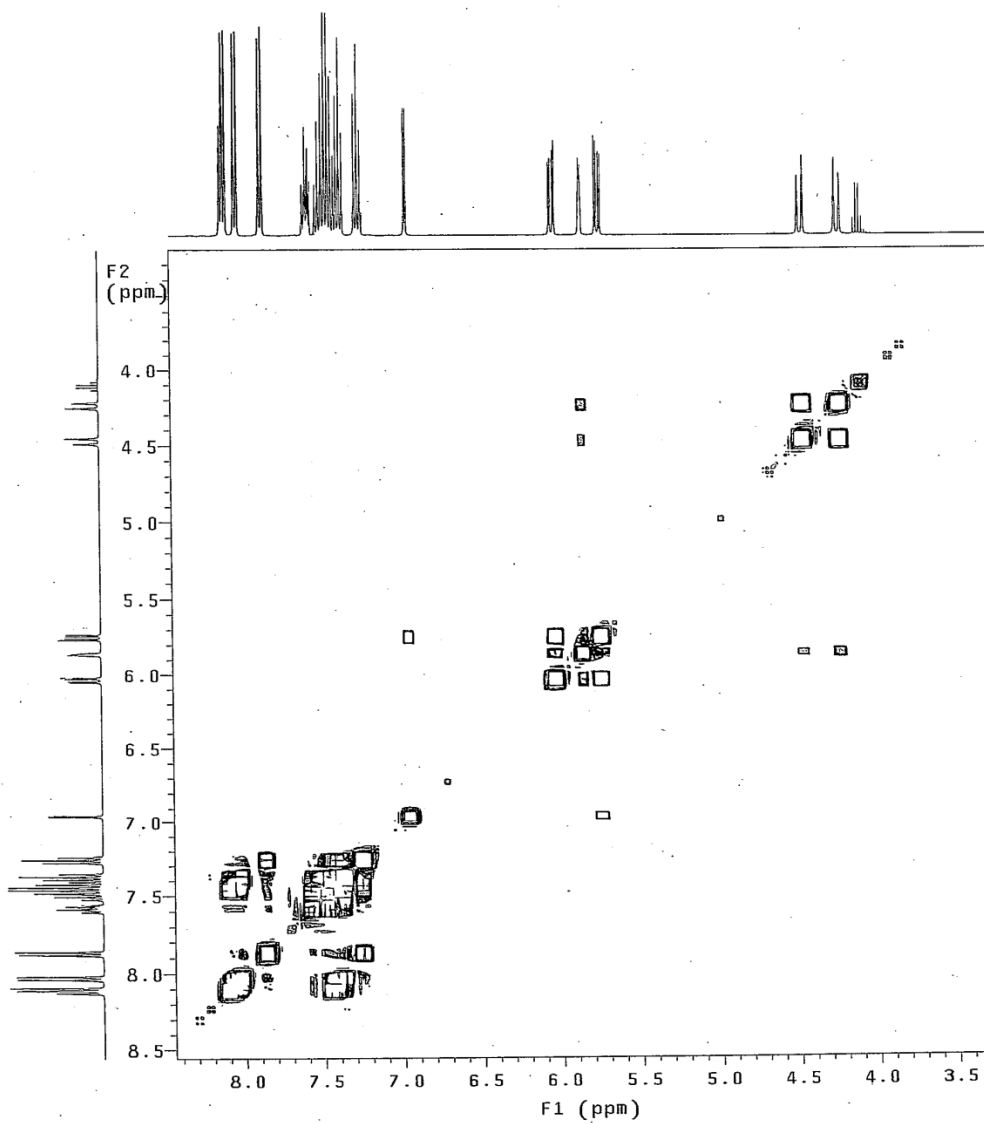

S173

1-bromo-2,3,4-tri-O-benzoyl- $\alpha$ -D-arabinopyranoside (**49**):  $^{13}\text{C}$  NMR ( $\text{CDCl}_3$ , 100 MHz)

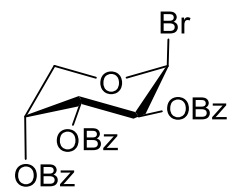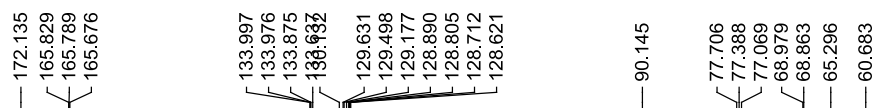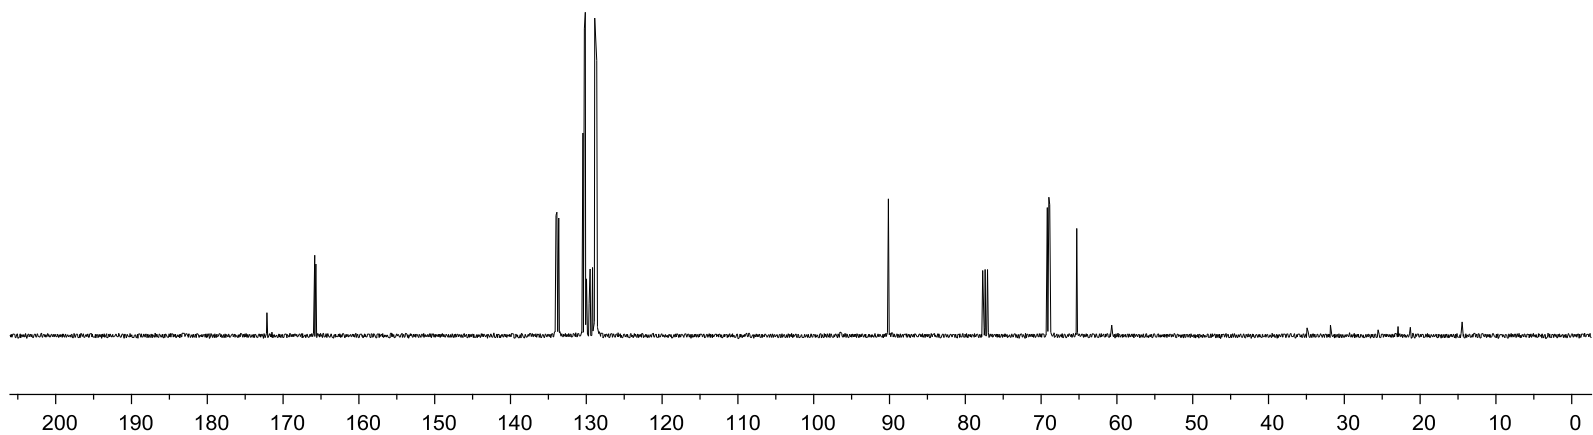

(2-chloro-4-nitrophenyl)-2,3,4-tri-O-benzoyl- $\alpha$ -L-arabinopyranoside (**50**):  $^1\text{H}$  NMR ( $\text{CDCl}_3$ , 500 MHz)

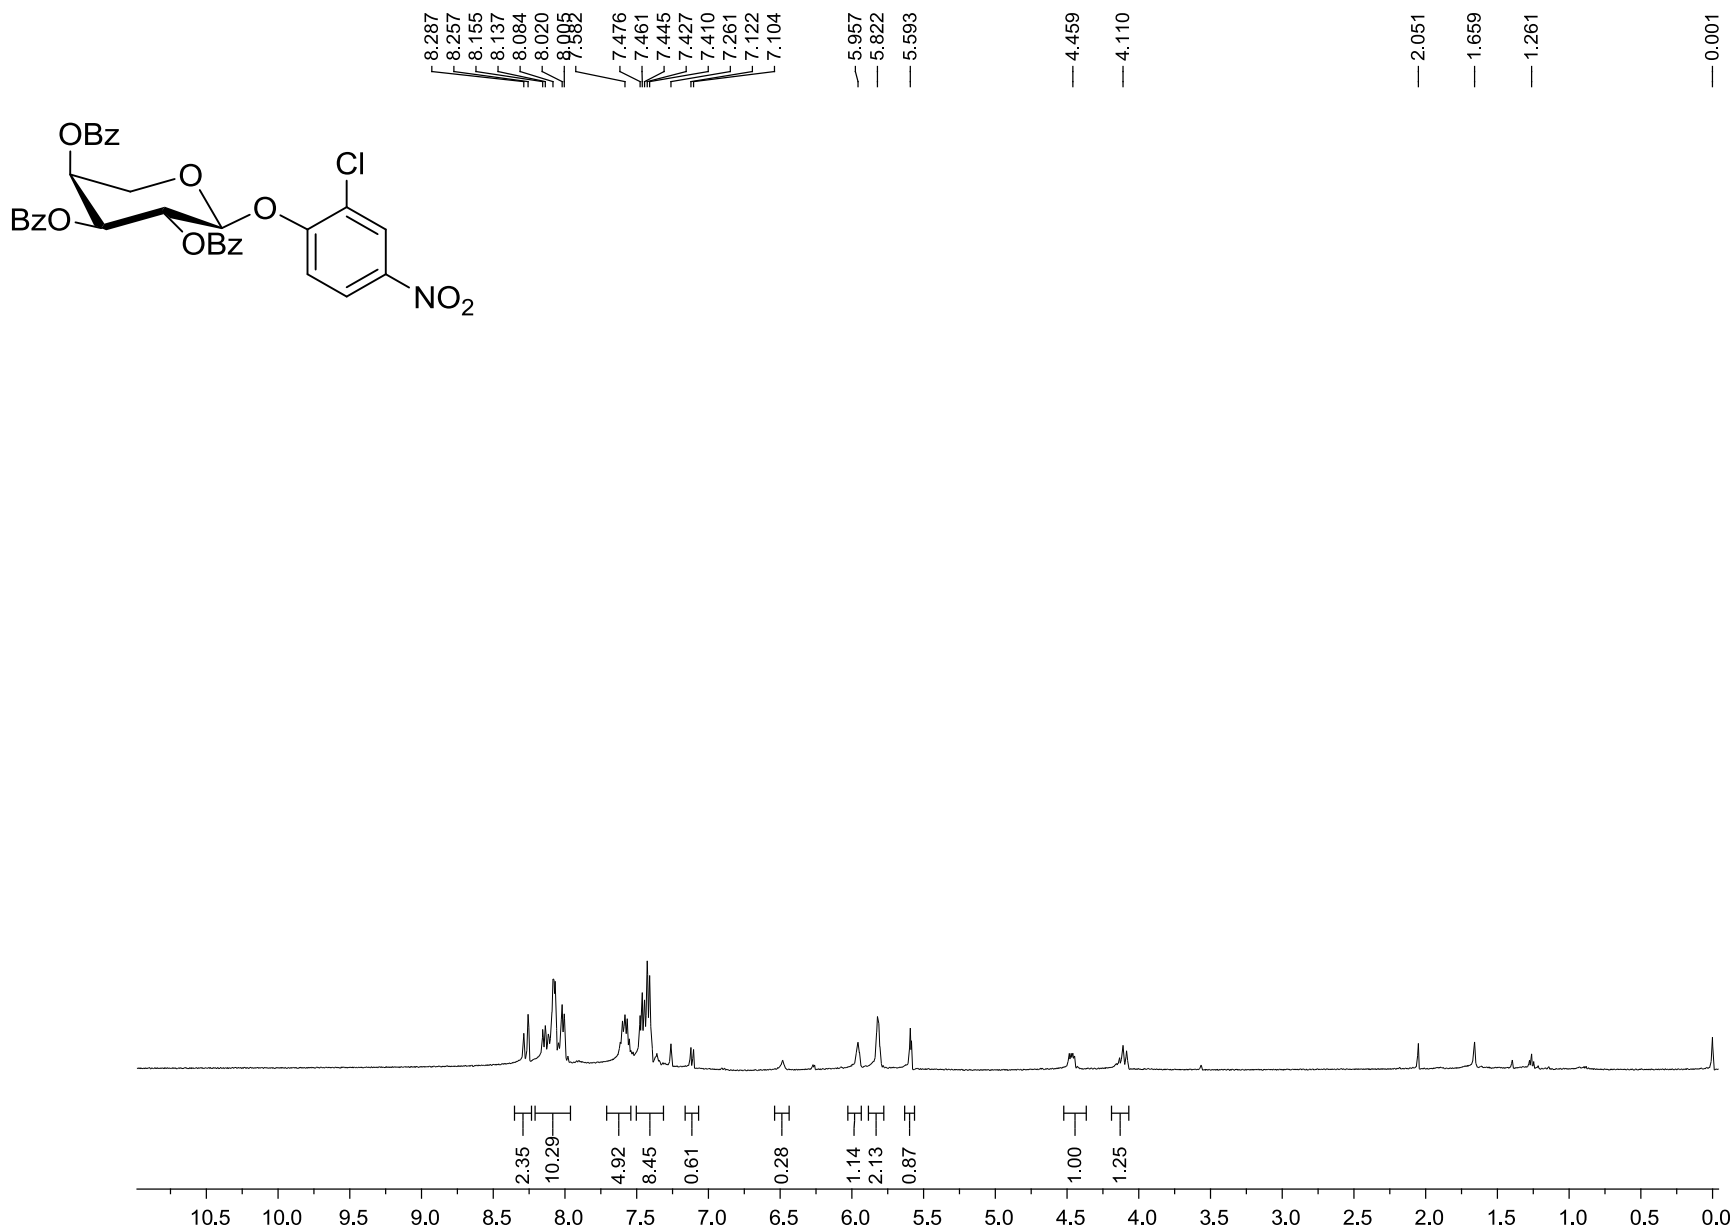

S175

(2-chloro-4-nitrophenyl)-2,3,4-tri-O-benzoyl- $\alpha$ -L-arabinopyranoside (**50**):  $^{13}\text{C}$  NMR ( $\text{CDCl}_3$ , 100 MHz)

165.547  
165.510  
165.030  
— 157.375  
— 142.810  
133.792  
133.609  
129.856  
128.685  
126.132  
123.702  
116.218  
116.116  
— 98.311  
77.323  
77.005  
76.830  
76.687  
76.509  
69.194  
68.873  
66.667  
— 60.917

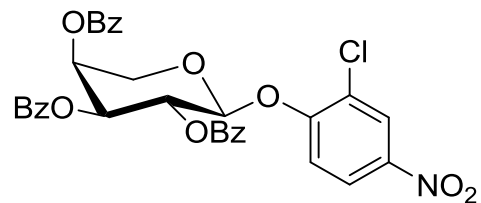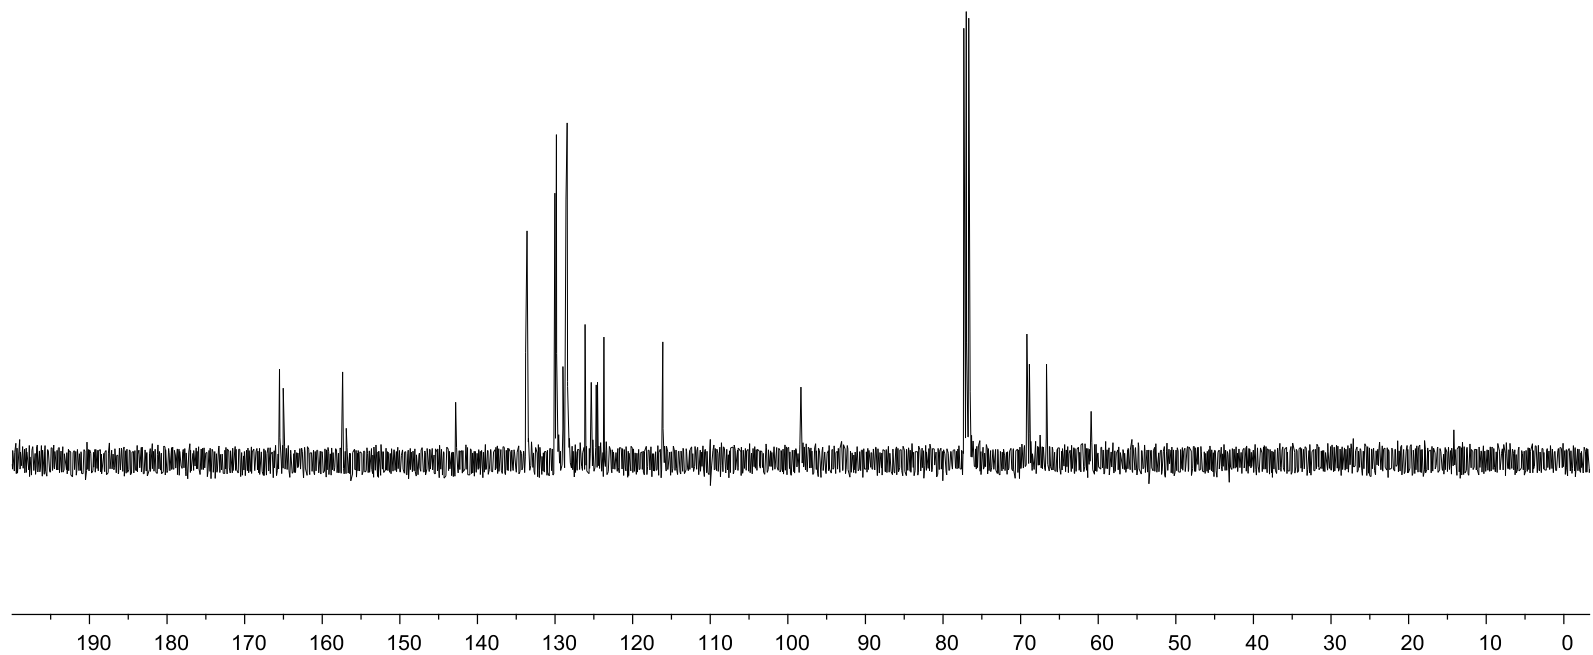

S176

(2-chloro-4-nitrophenyl)-2,3,4-tri-O-benzoyl- $\beta$ -D-arabinopyranoside (**51**):  $^1\text{H}$  NMR ( $\text{CDCl}_3$ , 500 MHz)

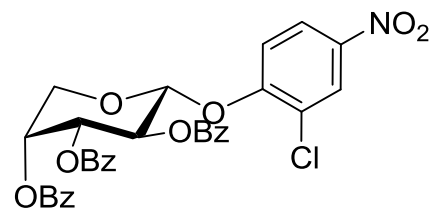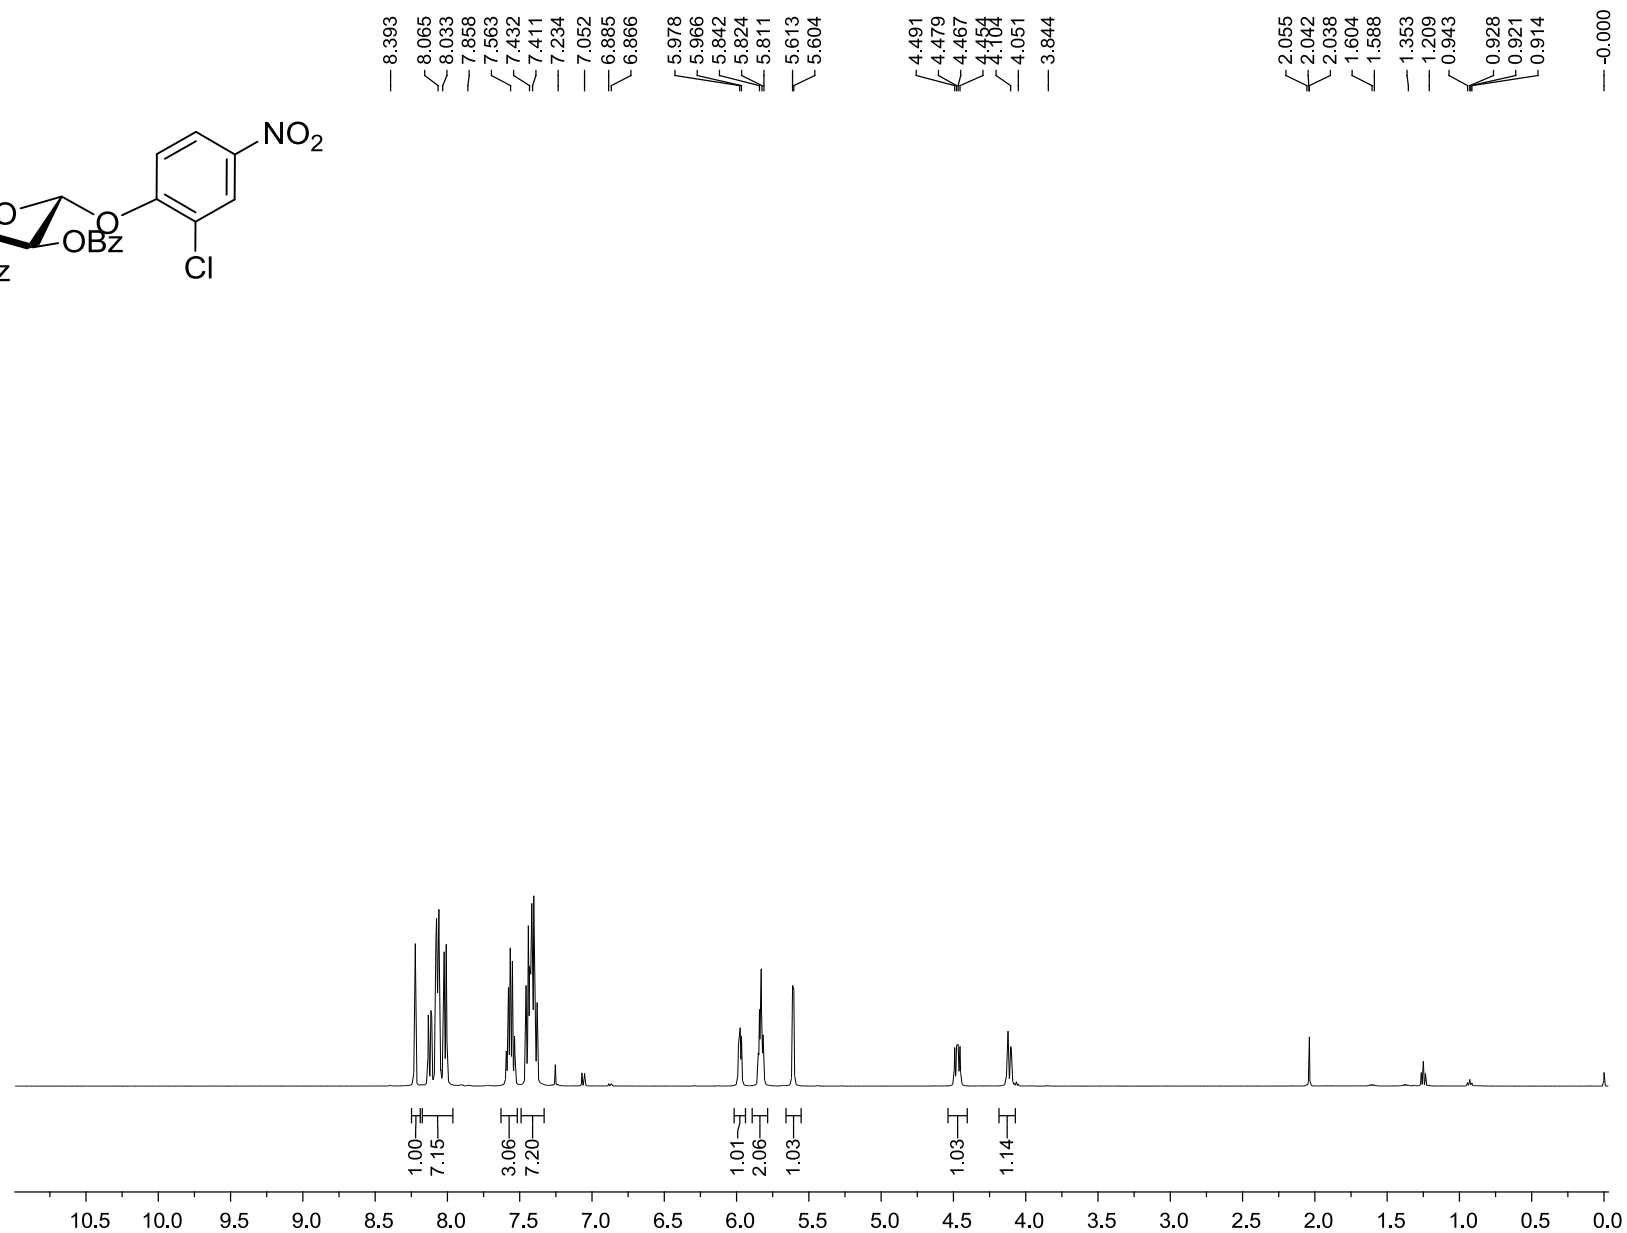

S177

(2-chloro-4-nitrophenyl)-2,3,4-tri-O-benzoyl- $\beta$ -D-arabinopyranoside (**51**): gCOSY (CDCl<sub>3</sub>, 500 MHz)

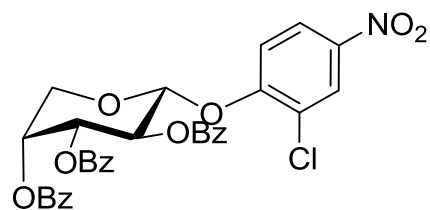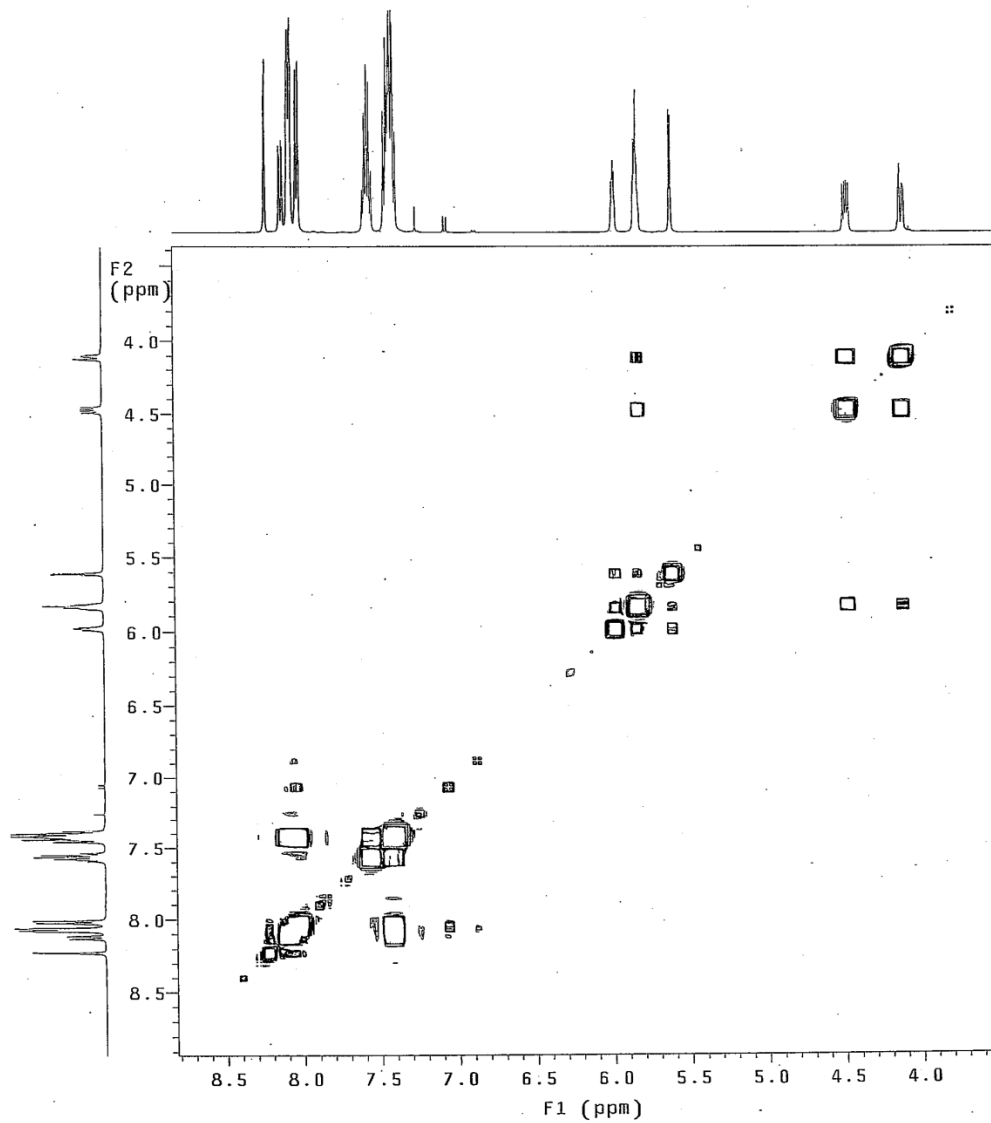

S178

(2-chloro-4-nitrophenyl)-2,3,4-tri-O-benzoyl- $\beta$ -D-arabinopyranoside (**51**):  $^{13}\text{C}$  NMR ( $\text{CDCl}_3$ , 125 MHz)

165.848  
165.811  
165.344  
157.703  
157.489  
— 143.128  
134.069  
133.997  
128.855  
125.756  
124.012  
116.547  
116.454  
— 98.705  
77.636  
77.381  
77.126  
69.566  
69.289  
67.088  
— 61.381

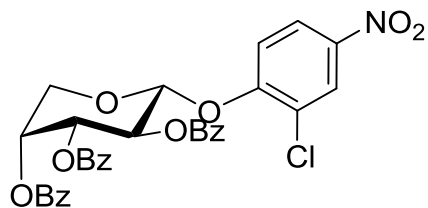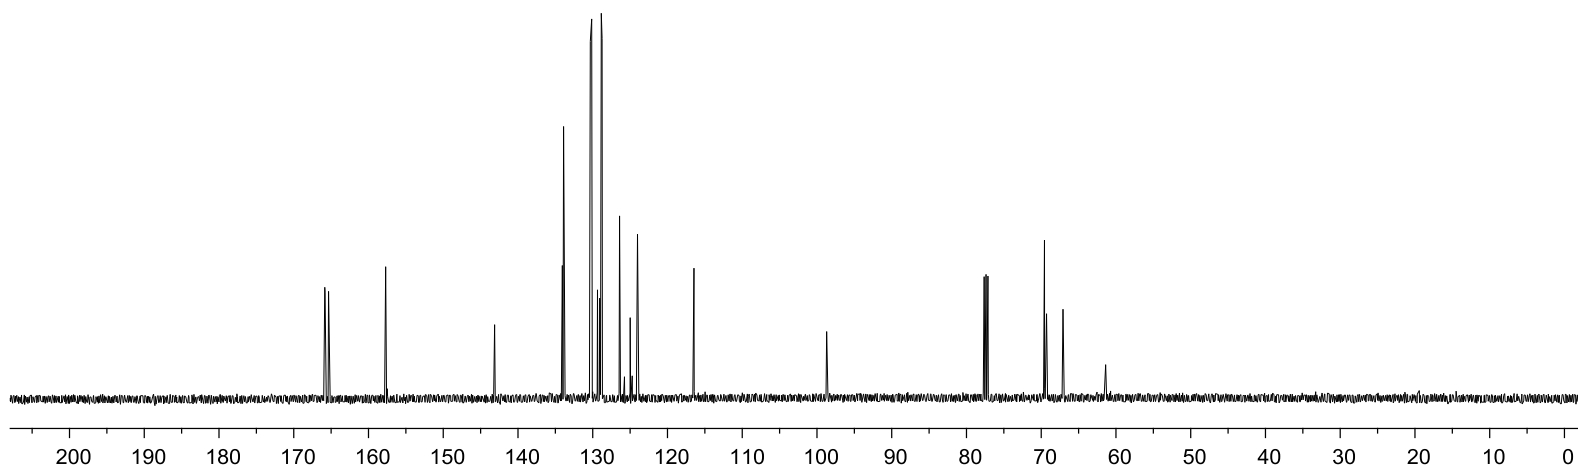

1,2,3,4-tetra-O-benzoyl- $\alpha$ -L-arabinopyranoside (**52**):  $^1\text{H}$  NMR ( $\text{CDCl}_3$ , 500 MHz)

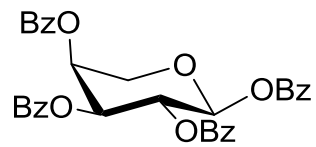

8.281  
8.281  
8.276  
8.046  
8.015  
7.979  
7.421  
7.406  
7.359  
7.260  
7.115  
7.097  
6.277  
6.266  
5.954  
5.805  
4.432  
4.166  
4.142

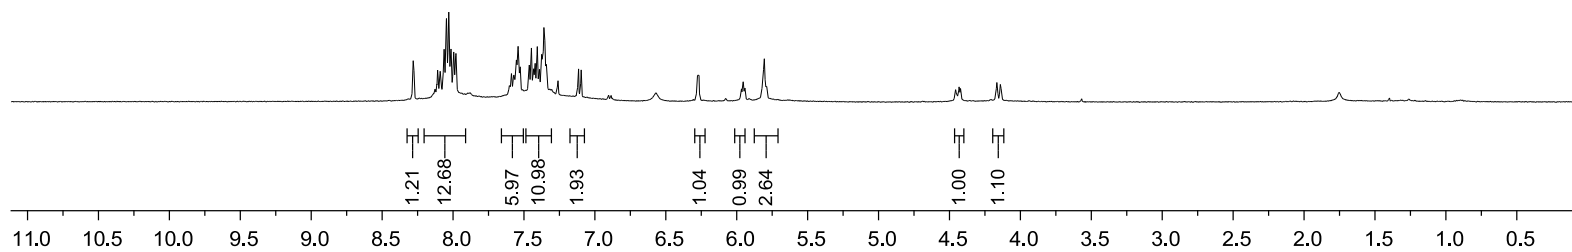



1,2,3,4-tetra-O-benzoyl- $\alpha$ -L-arabinopyranoside (**52**):  $^{13}\text{C}$  NMR ( $\text{CDCl}_3$ , 100 MHz)

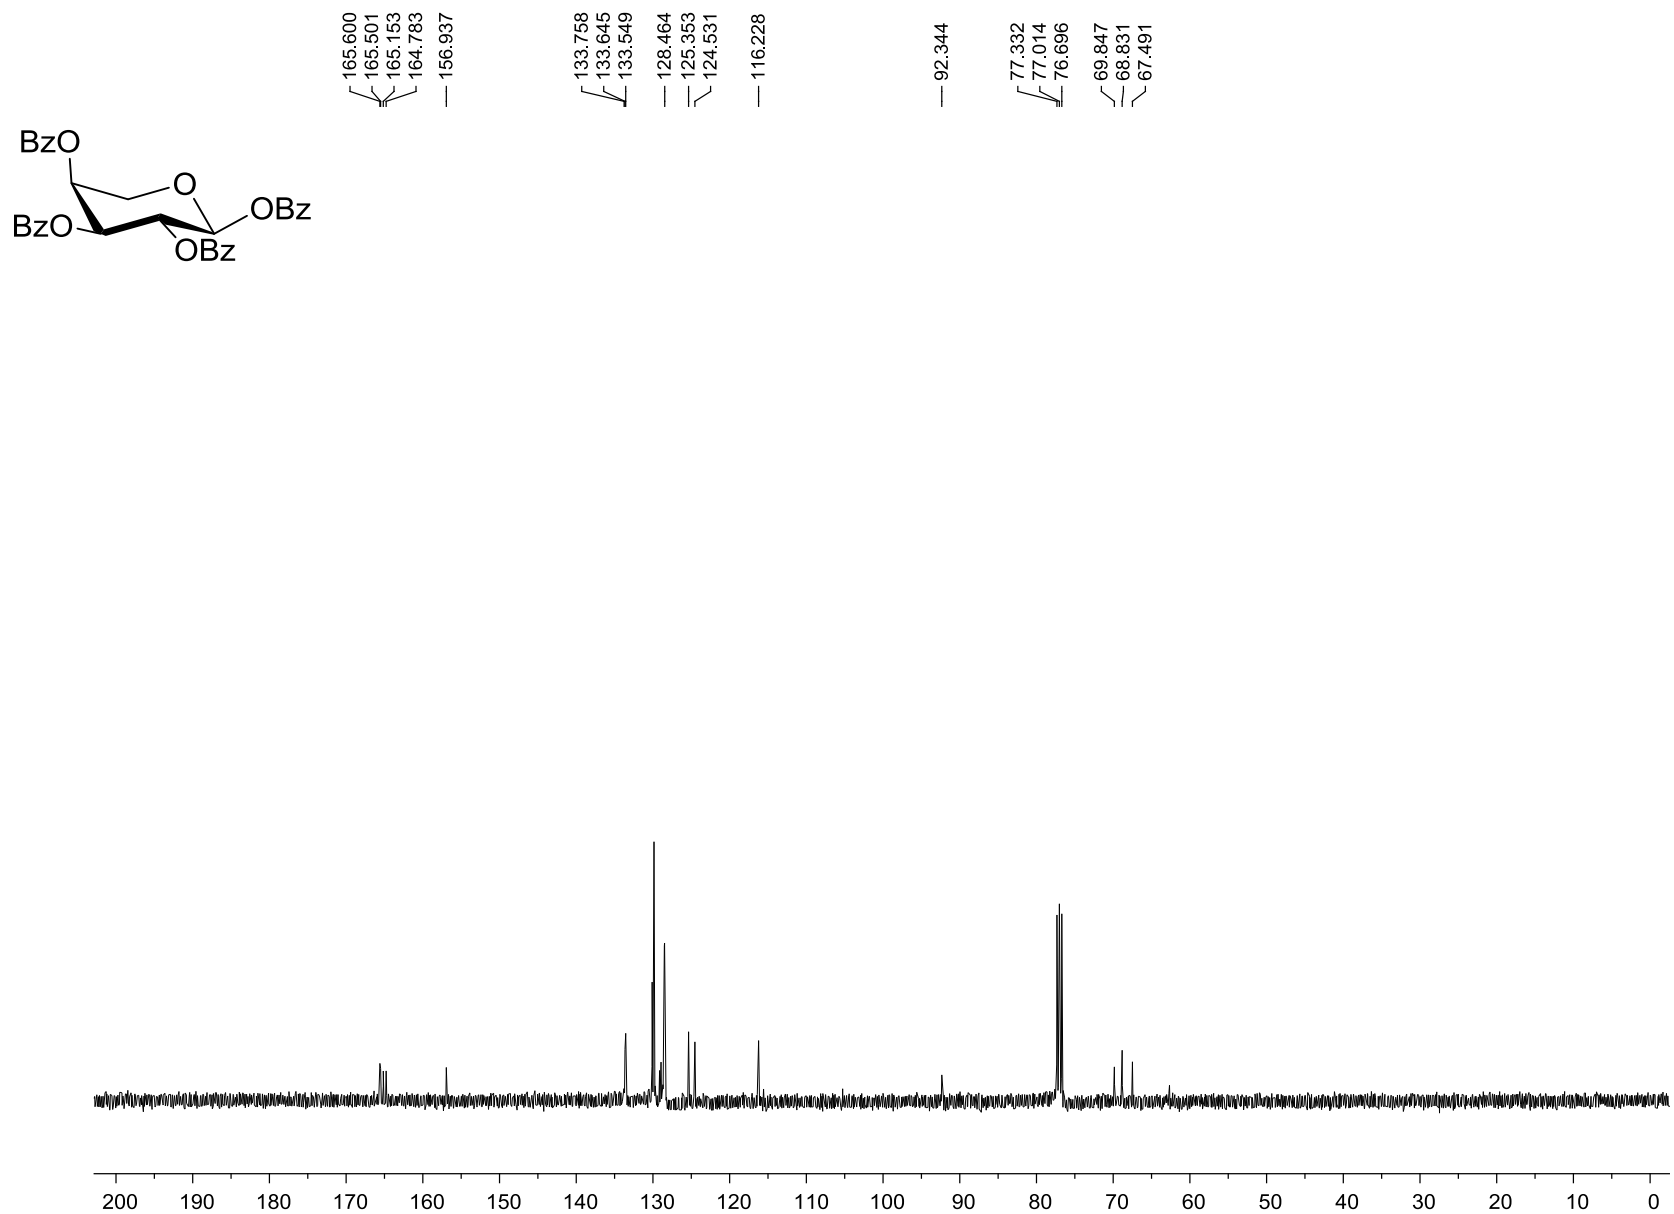

1,2,3,4-tetra-O-benzoyl- $\beta$ -D-arabinopyranoside (**53**):  $^1\text{H}$  NMR ( $\text{CDCl}_3$ , 500 MHz)

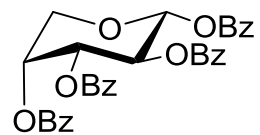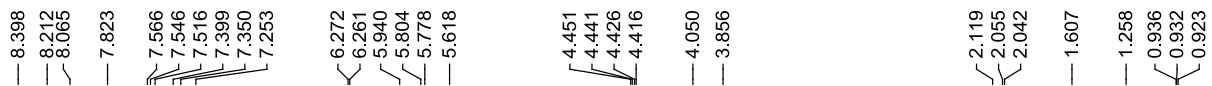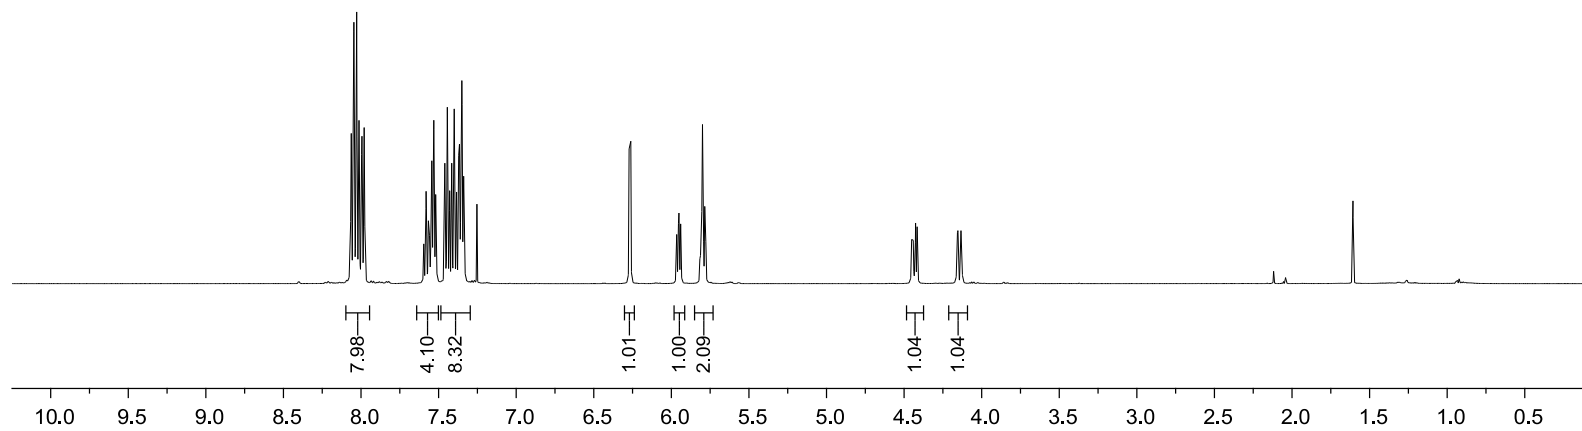

1,2,3,4-tetra-O-benzoyl- $\beta$ -D-arabinopyranoside (**53**): gCOSY NMR ( $\text{CDCl}_3$ , 500 MHz)

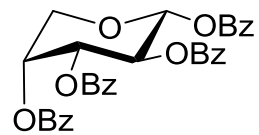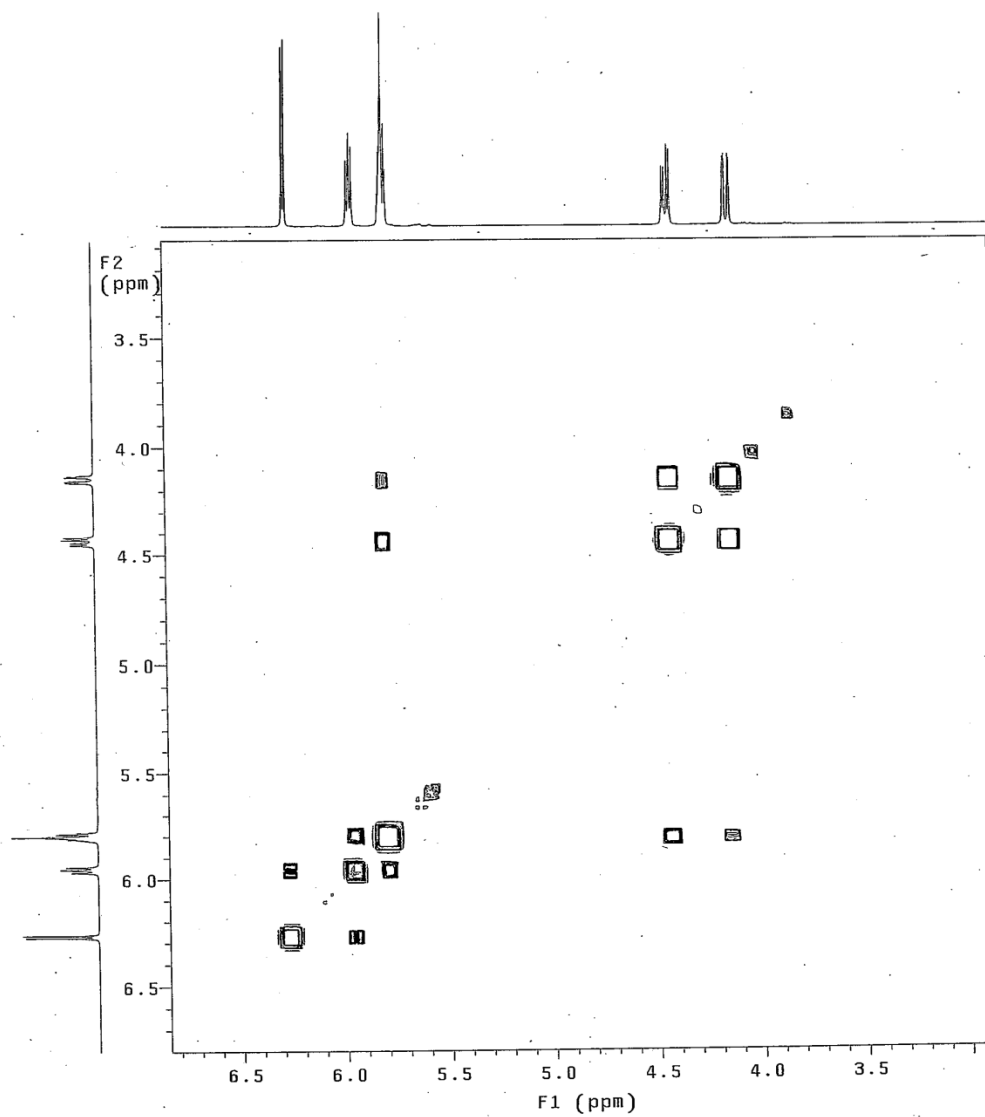

S183

1,2,3,4-tetra-O-benzoyl- $\beta$ -D-arabinopyranoside (**53**):  $^{13}\text{C}$  NMR ( $\text{CDCl}_3$ , 125 MHz)

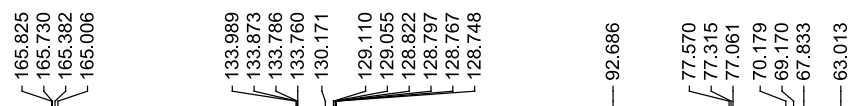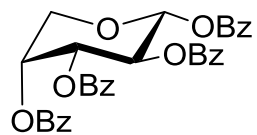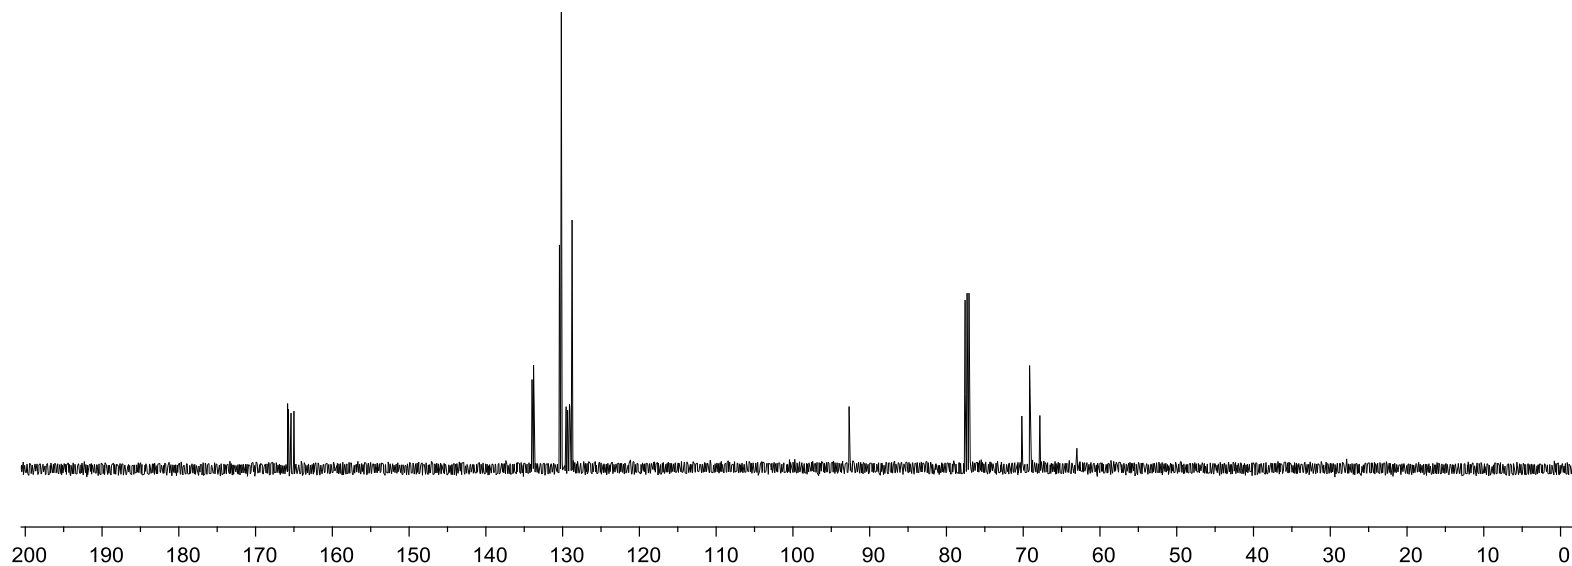

Supplement: NIHMS584897-supplement-Supporting_Information.pdf [file NIHMS584897-supplement-Supporting_Information.pdf]
